# Supplementary material
Source: bioRxiv or medRxiv preprint supplement (https://www.biorxiv.org/highwire/filestream/7121/field_highwire_adjunct_files/3/026153-4.pdf)

AZD6482:UO31

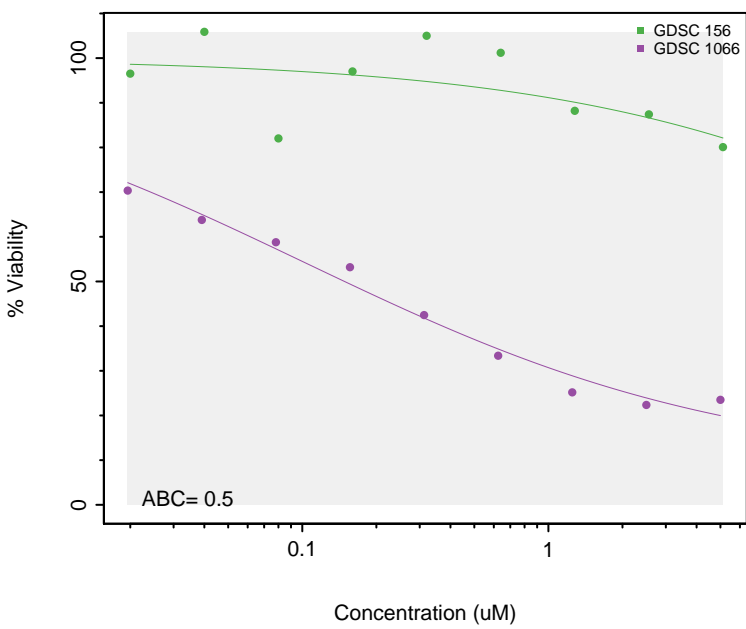

AZD6482:A498

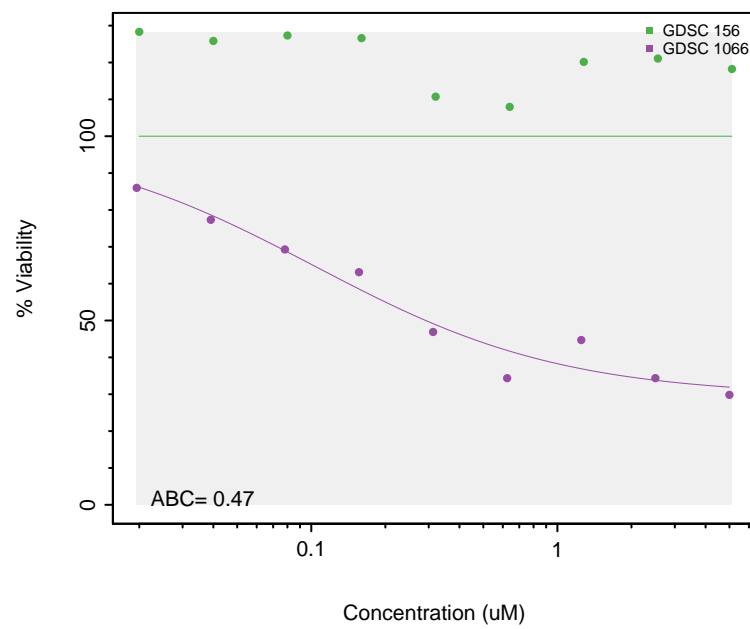

AZD6482:KURAMOCHI

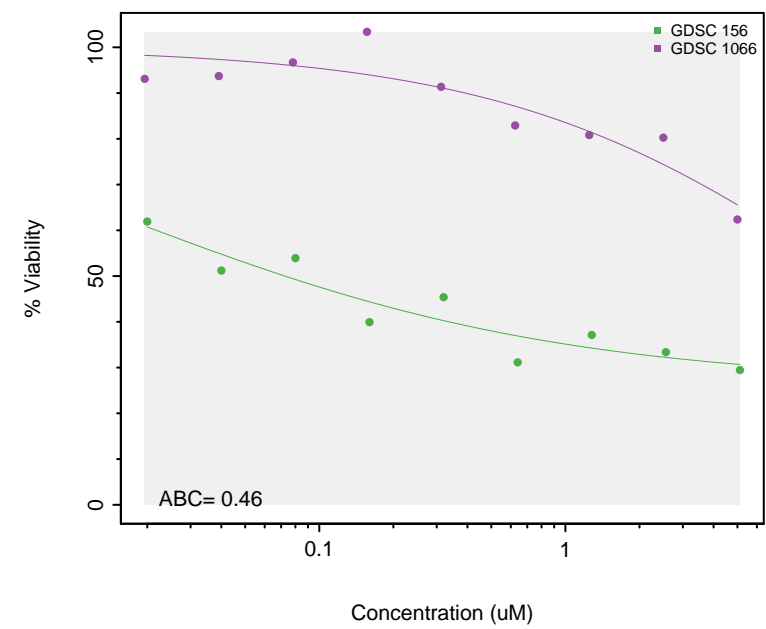

AZD6482:RPMI-8866

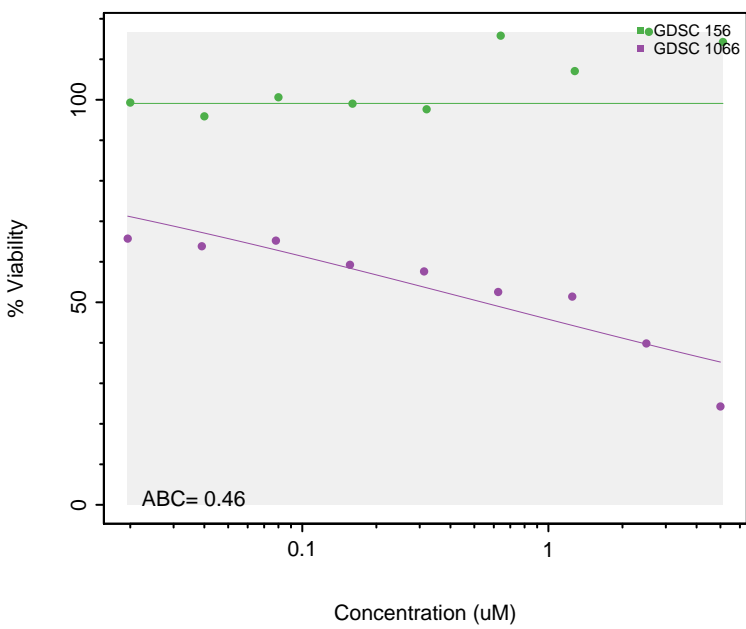

AZD6482:DG-75

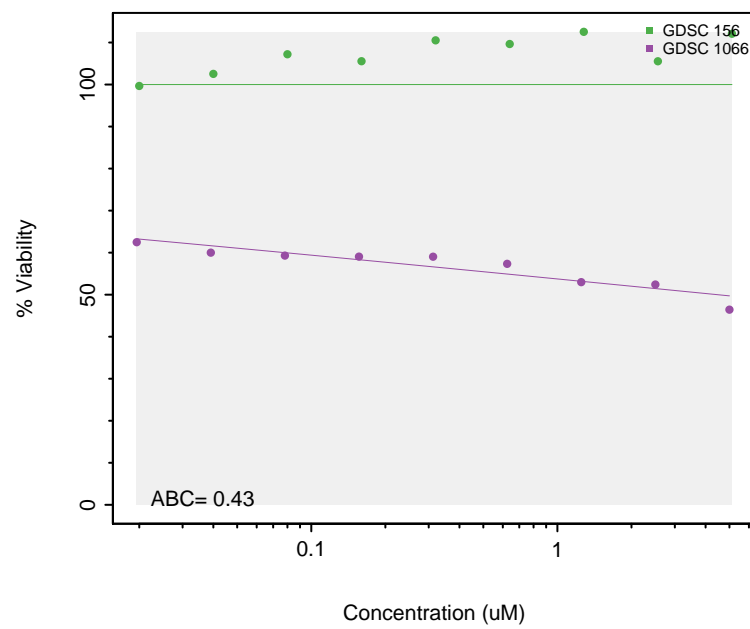

AZD6482:J82

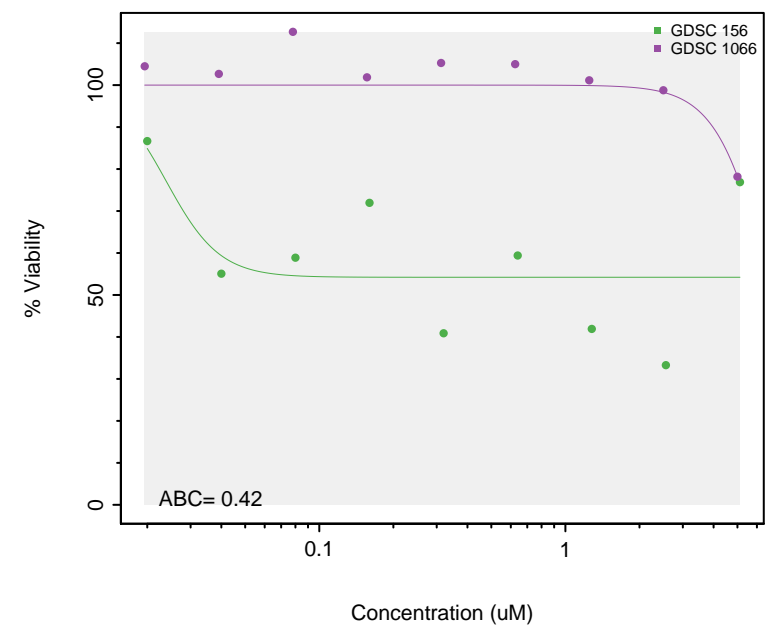

AZD6482:LB996-RCC

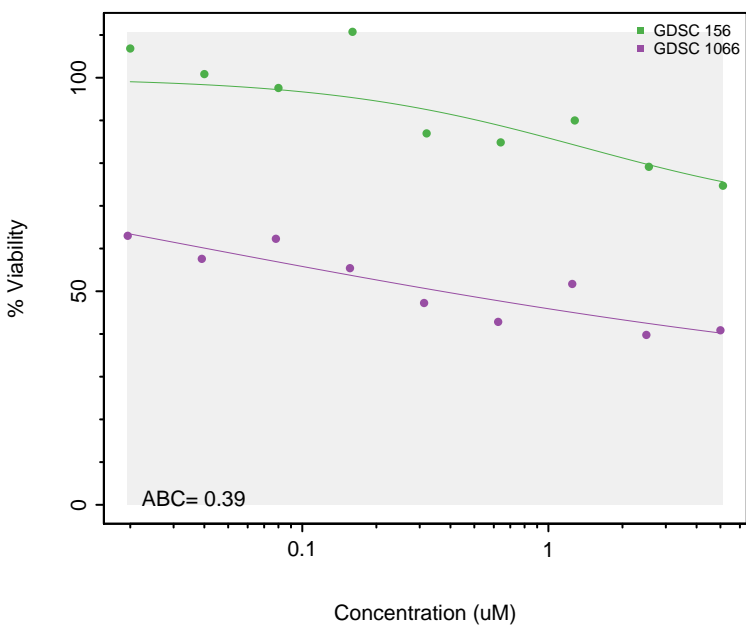

AZD6482:HoL-1-cell

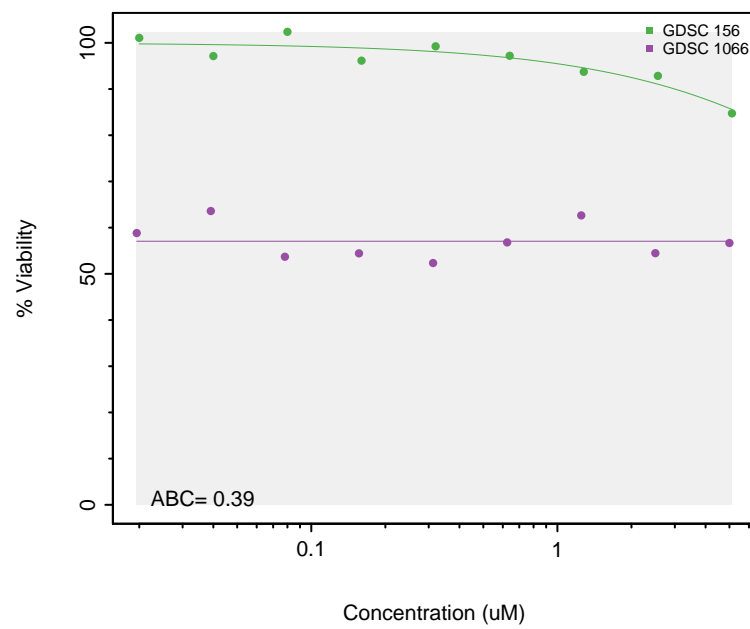

AZD6482:NCI-H2291

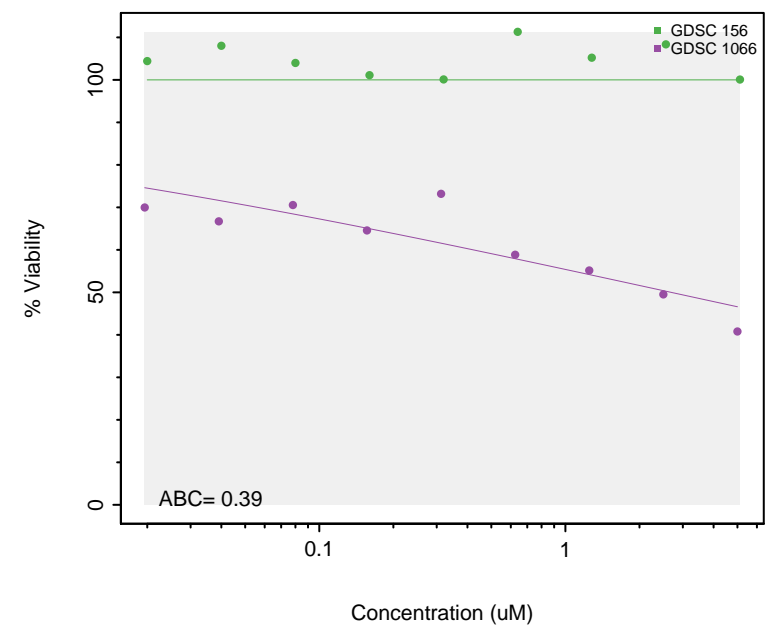

AZD6482:CCF-STTG1

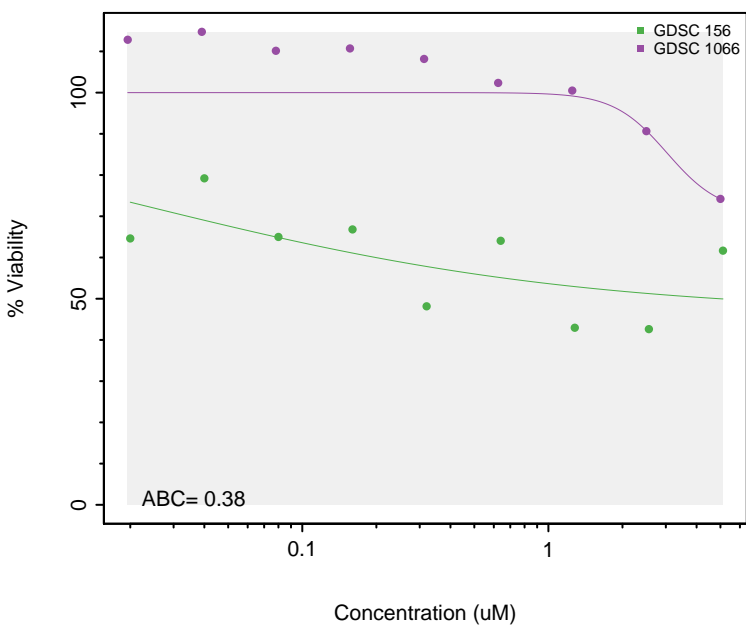

AZD6482:RXF393

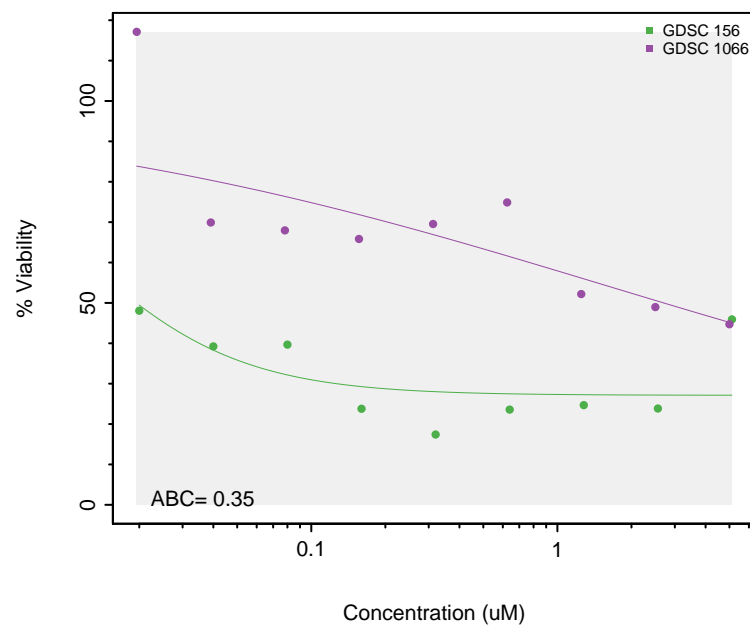

AZD6482:DU-145

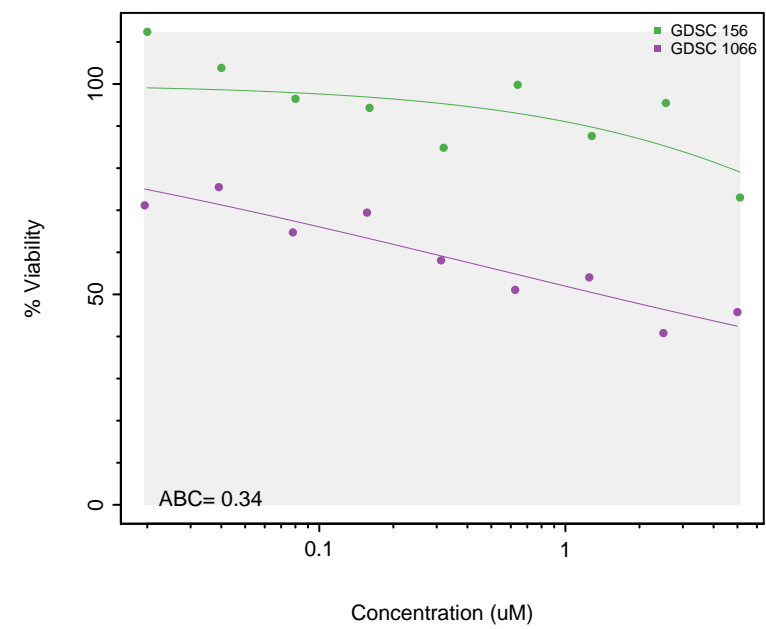

AZD6482:Becker

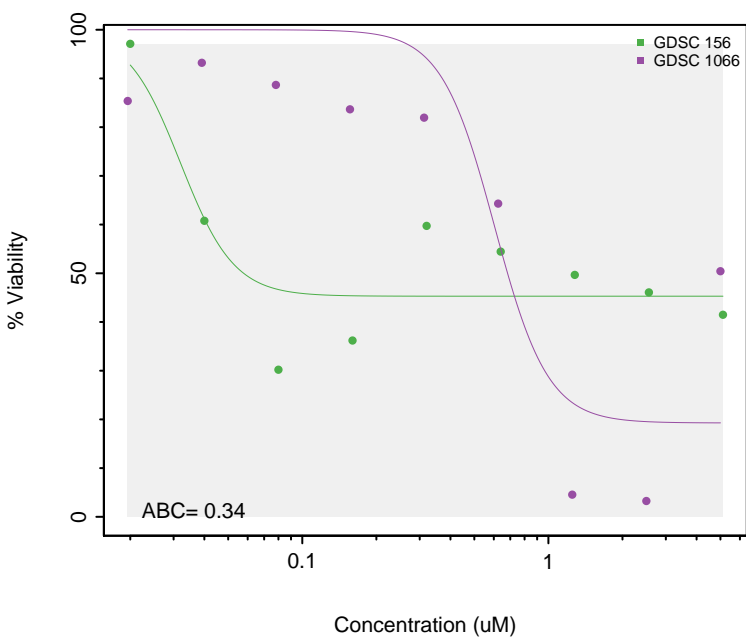

AZD6482:SW1783

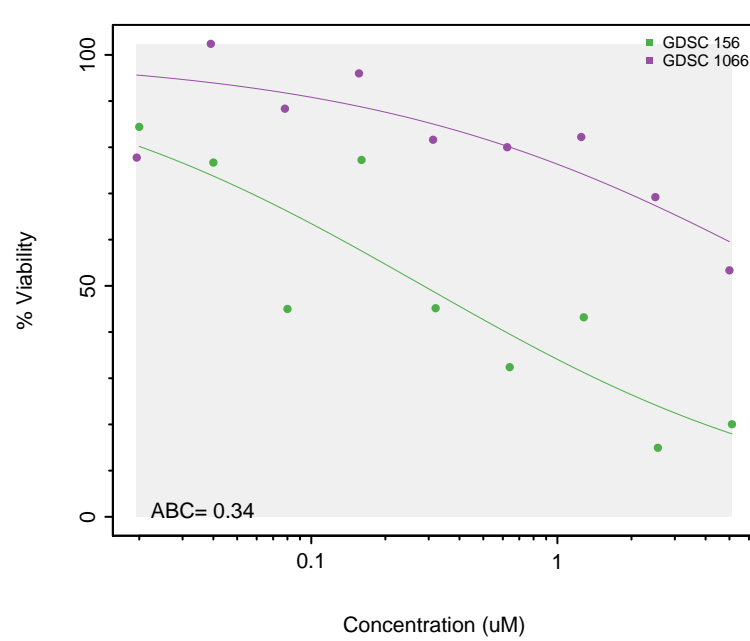

AZD6482:BB49-HNC

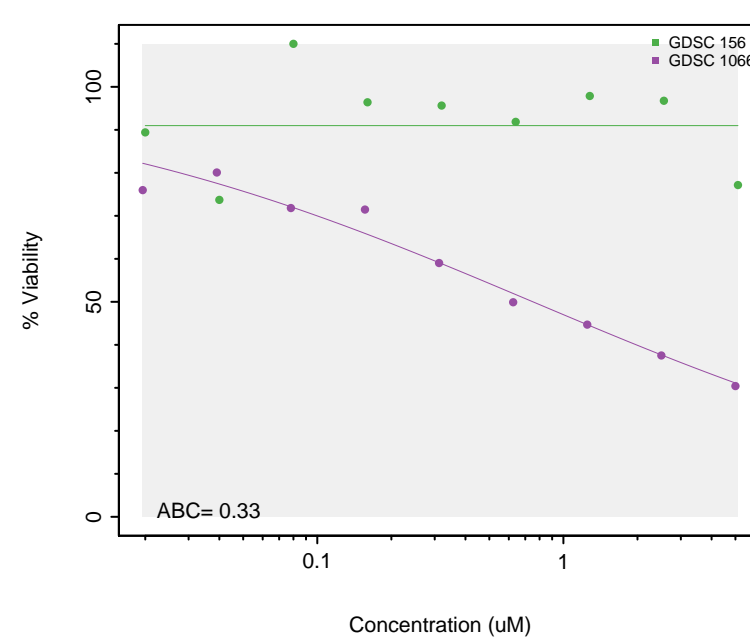

AZD6482:RERF-LC-MS

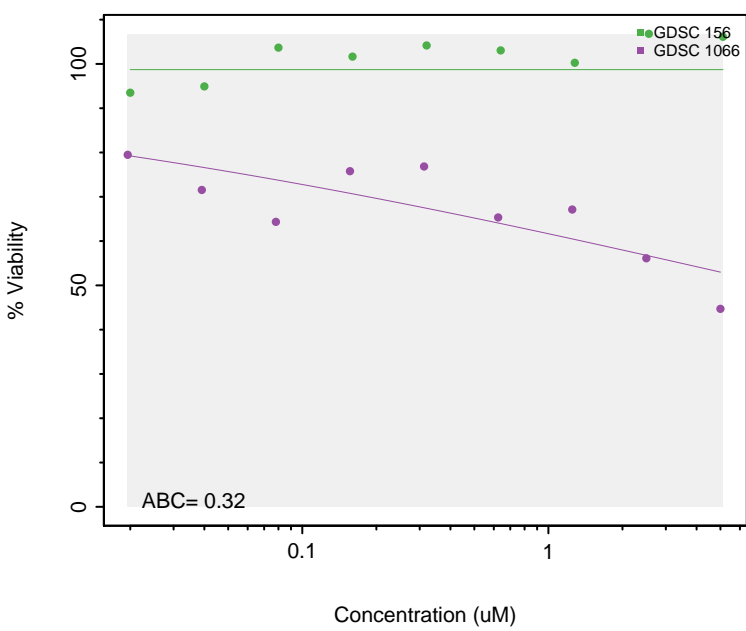

AZD6482:NCI-H2009

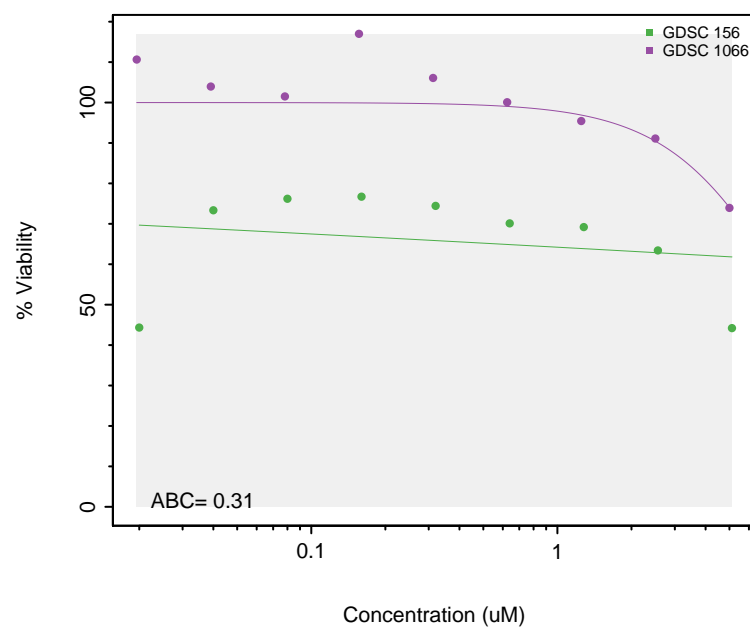

AZD6482:OS-RC-2

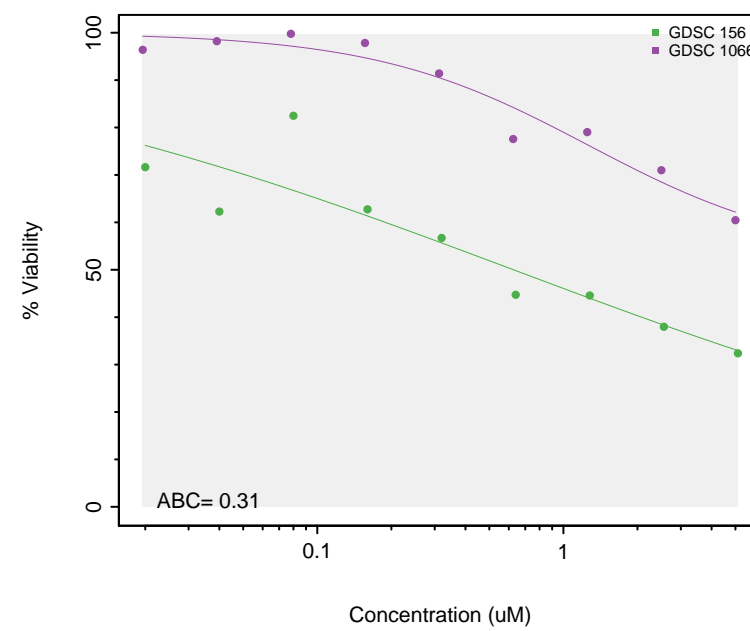

AZD6482:EVSA-T

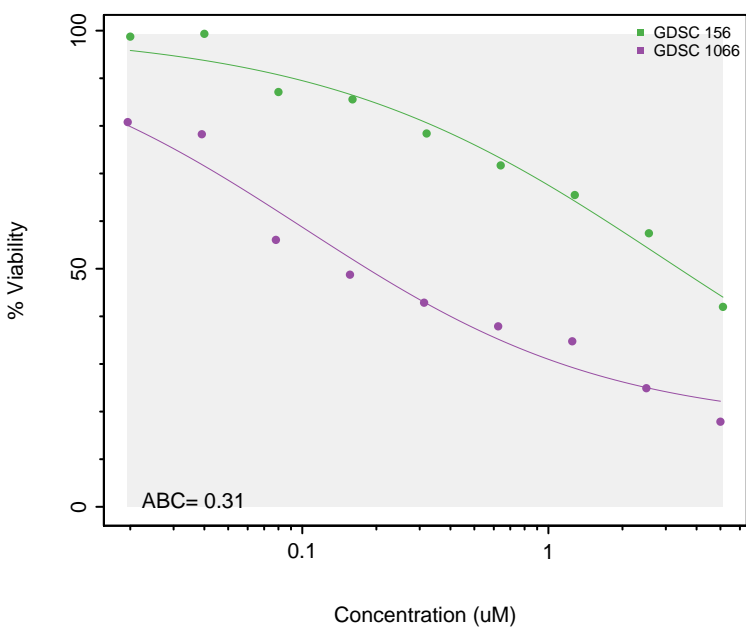

AZD6482:Daudi

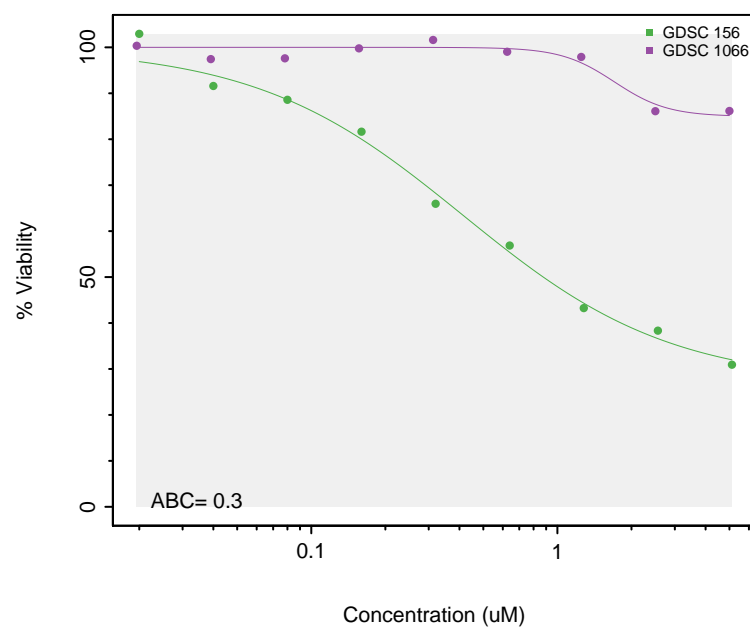

AZD6482:A427

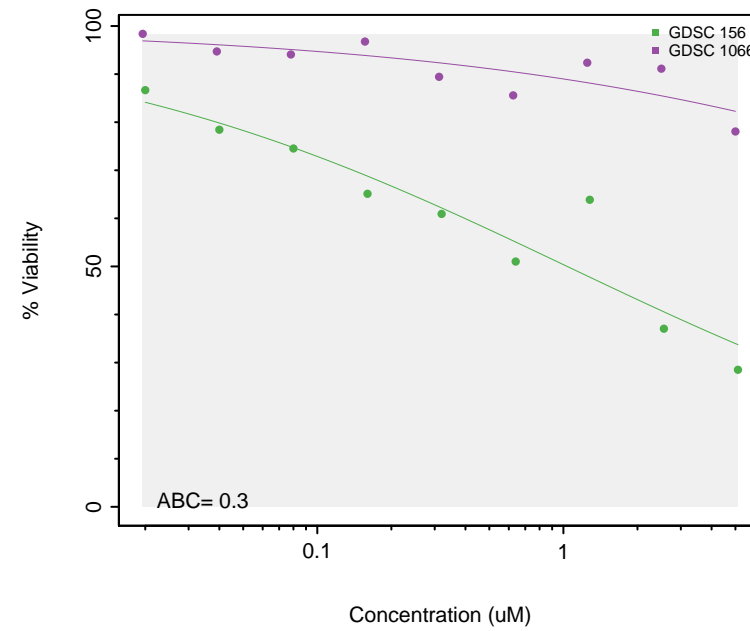

AZD6482:A101D

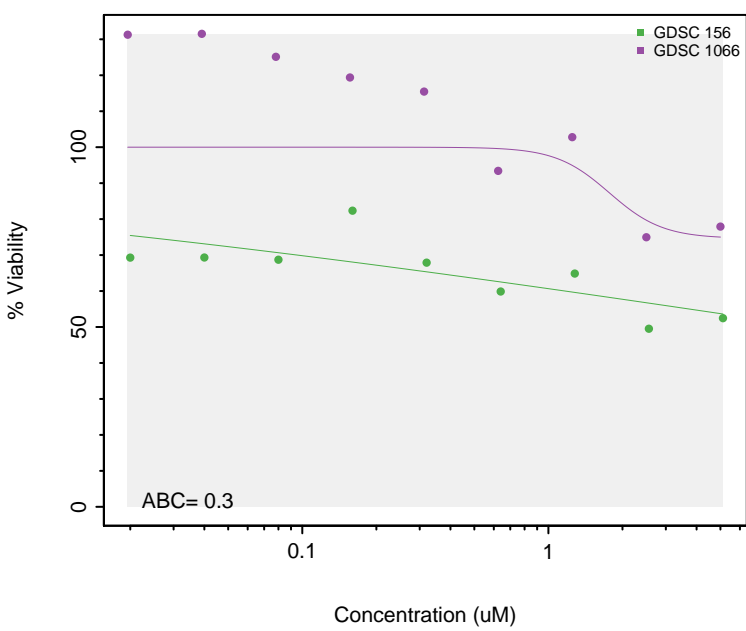

AZD6482:SW982

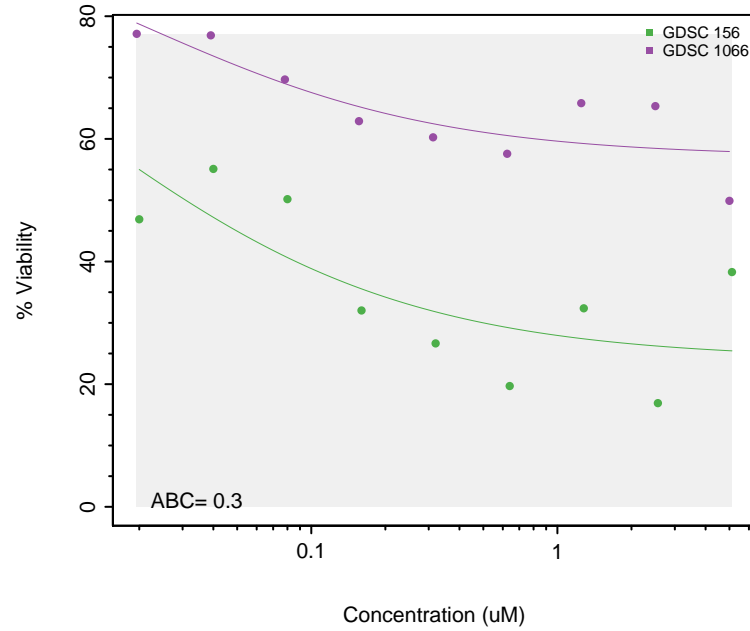

AZD6482:SNB75

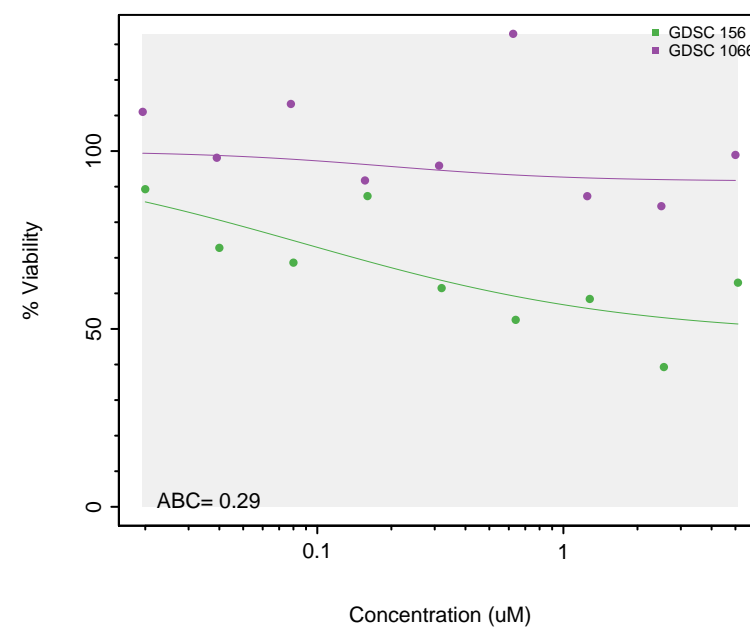

AZD6482:NEC8

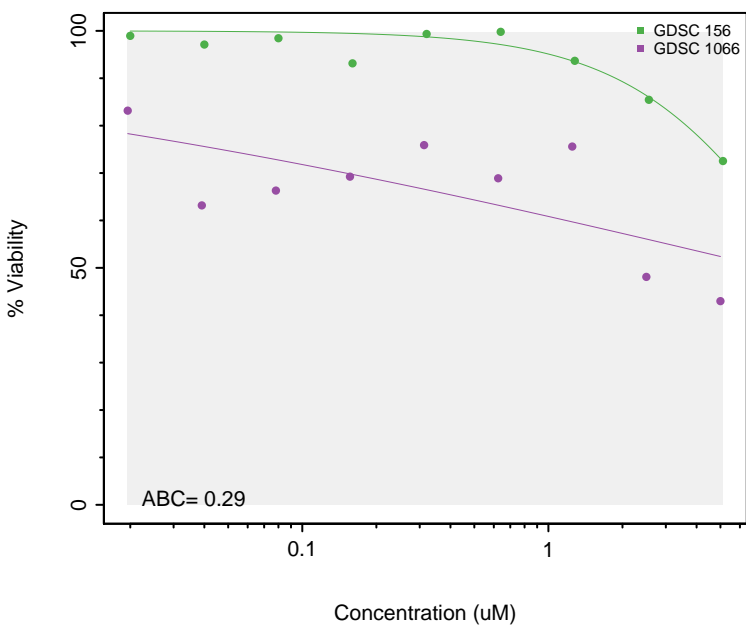

AZD6482:SCH

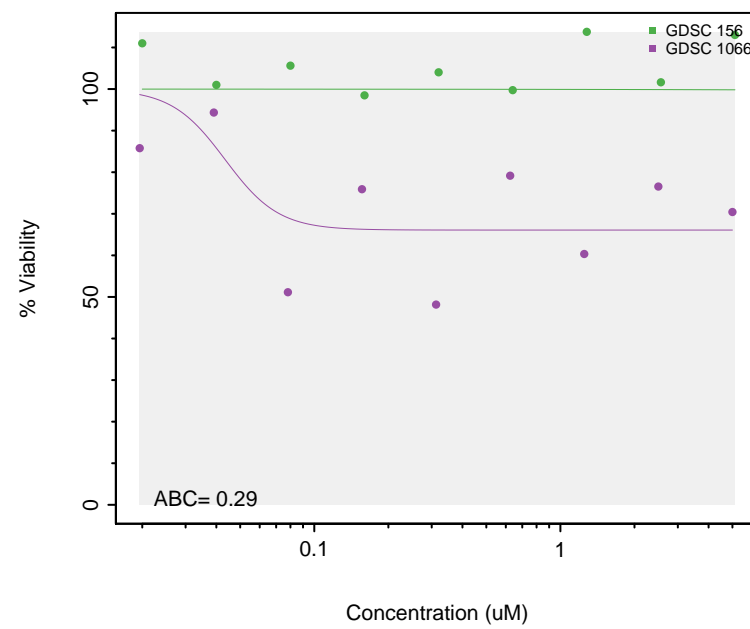

AZD6482:MDA-MB-415

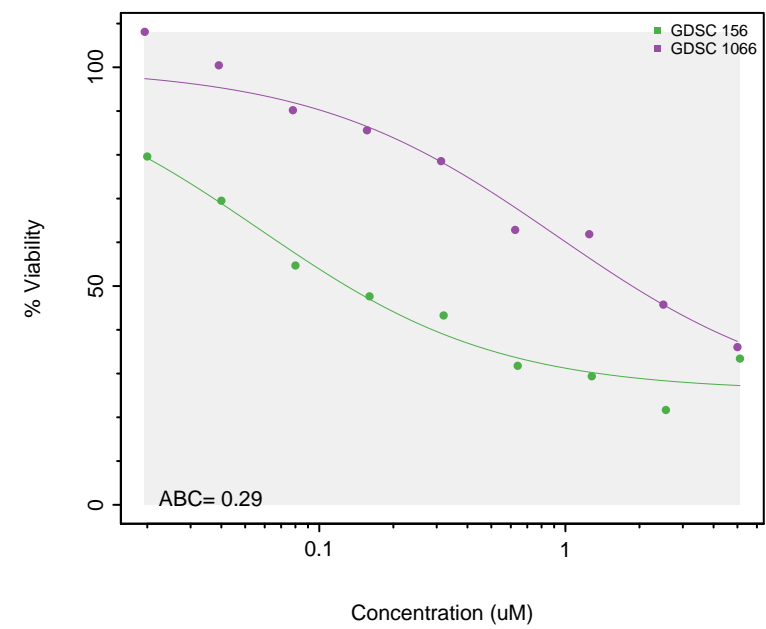

AZD6482:JAR

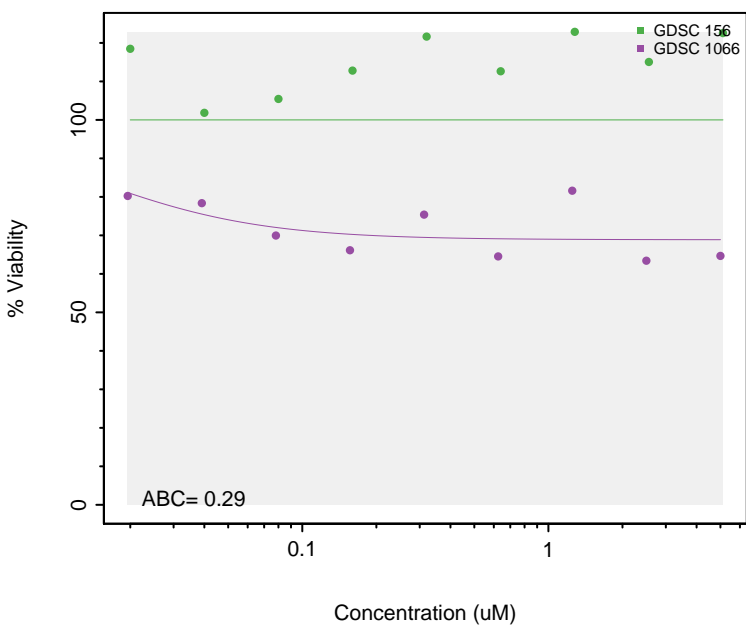

AZD6482:SW962

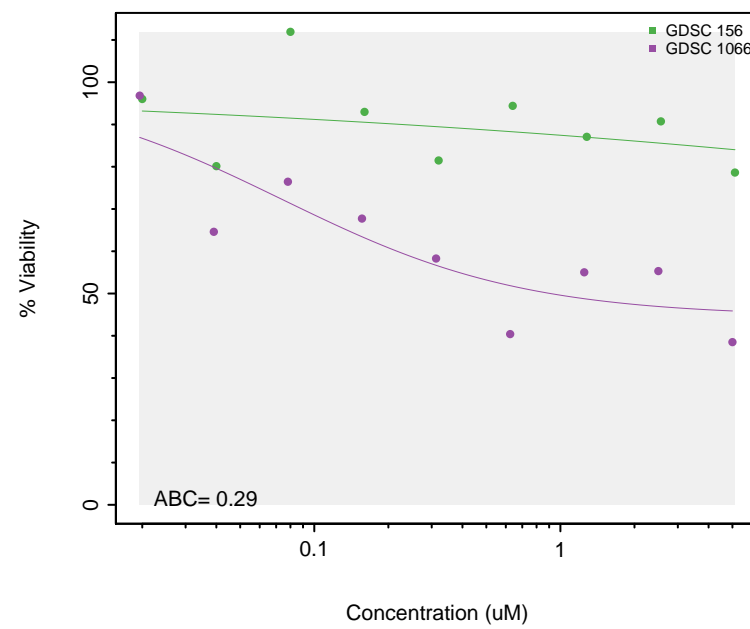

AZD6482:BHT-101

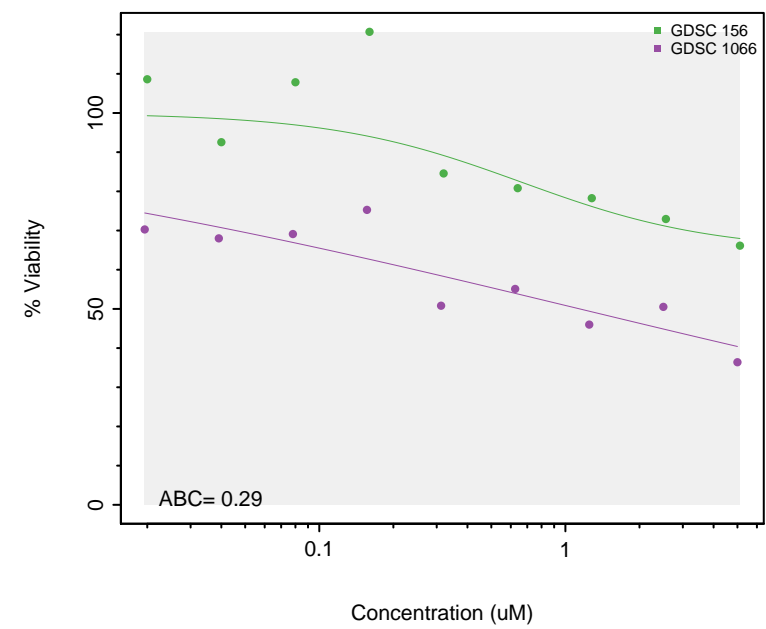

AZD6482:COLO-829

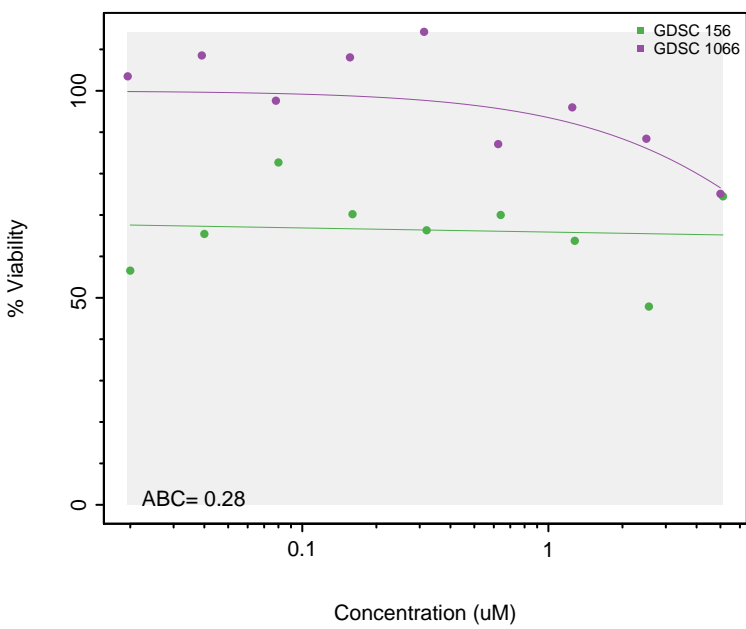

AZD6482:D-542MG

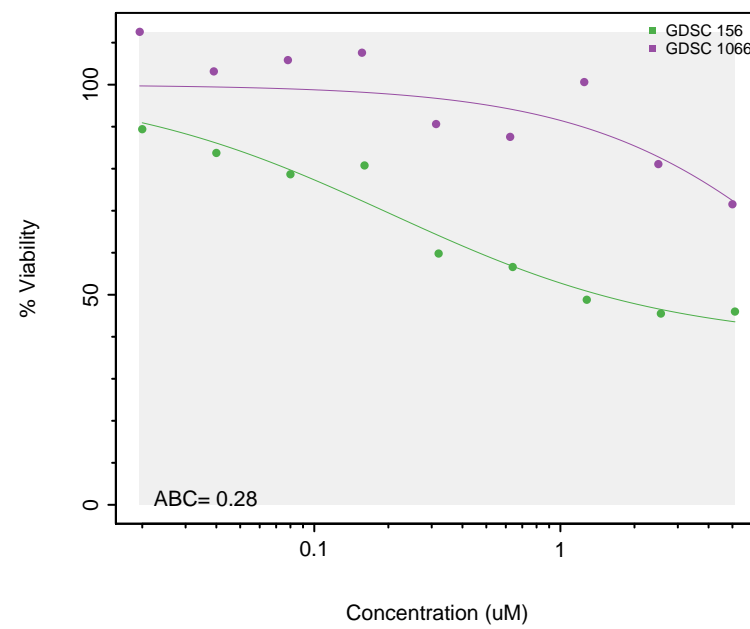

AZD6482:WSU-NHL

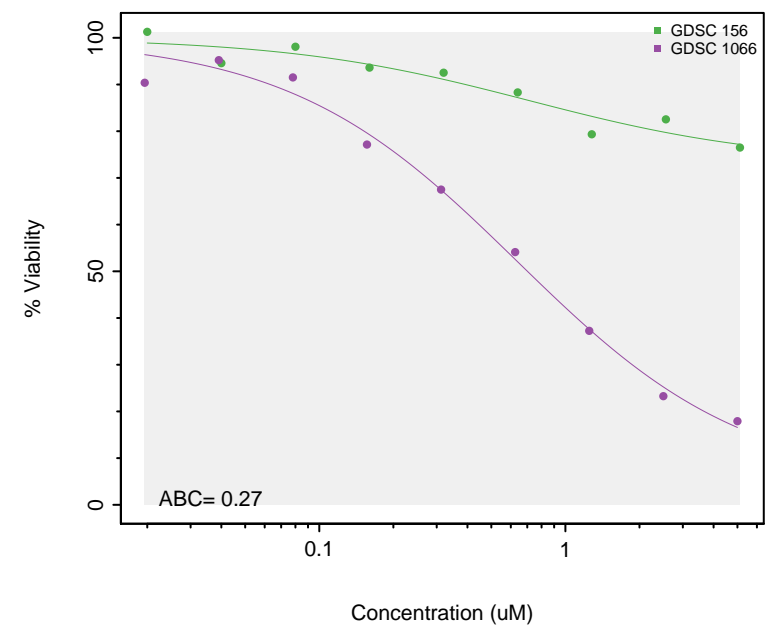

AZD6482:KGN

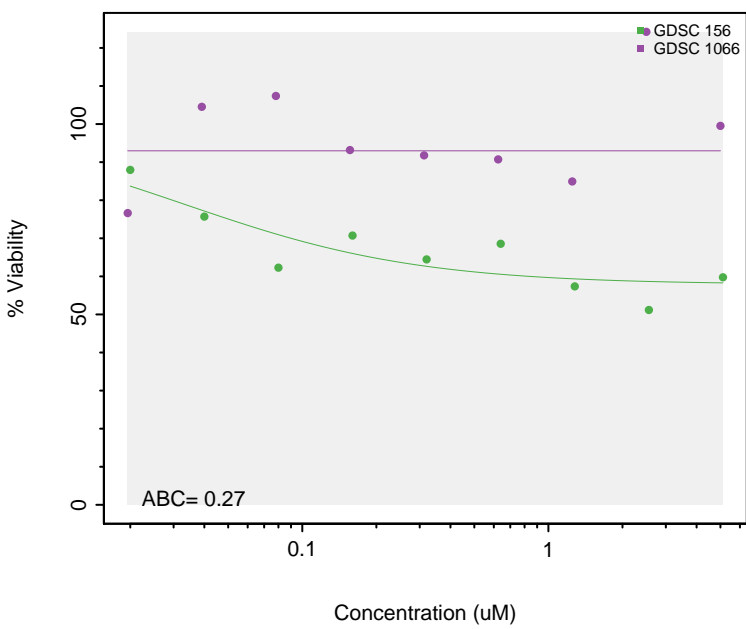

AZD6482:IPC-298

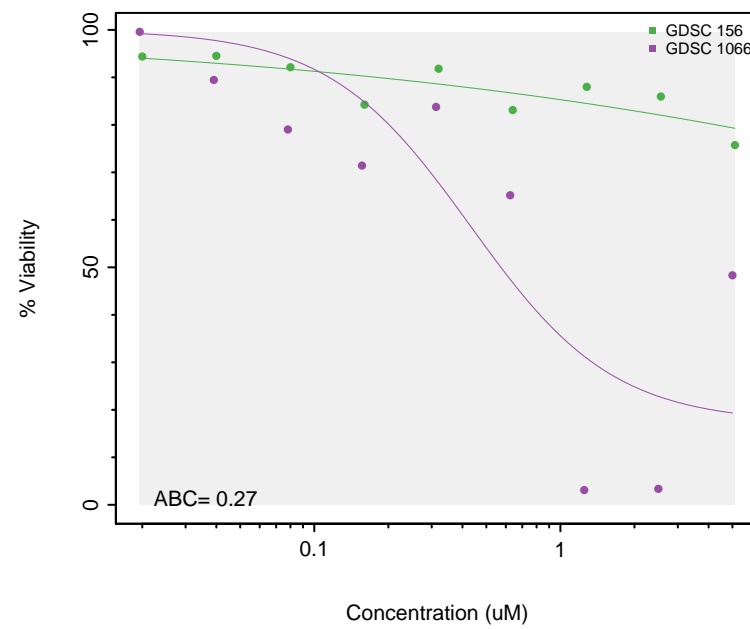

AZD6482:EB2

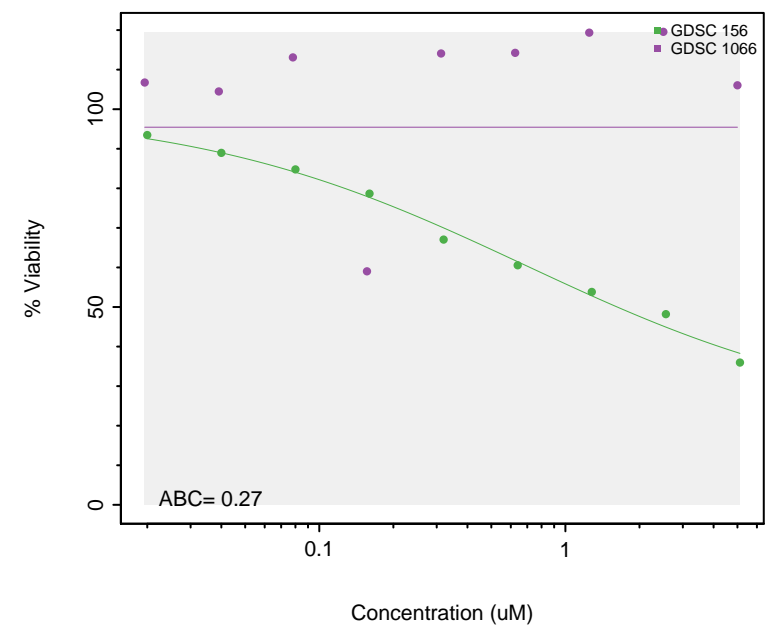

AZD6482:NCI-H358

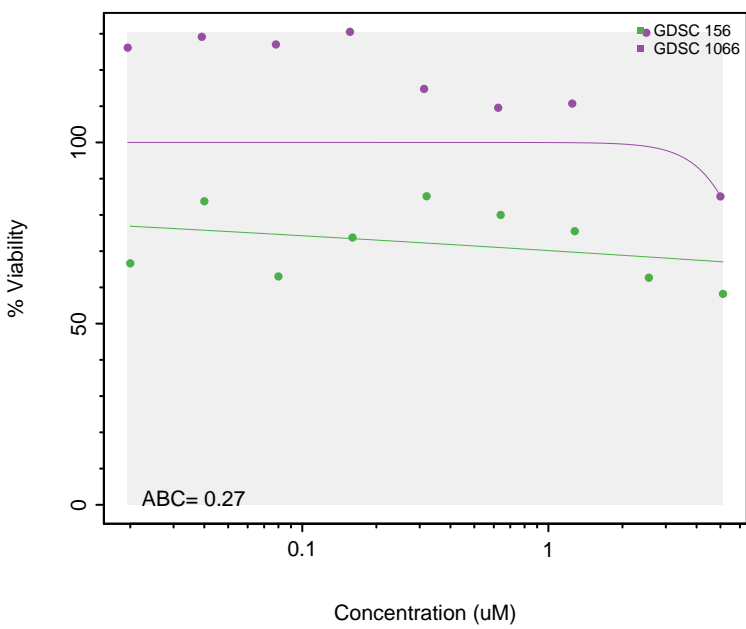

AZD6482:MFE-296

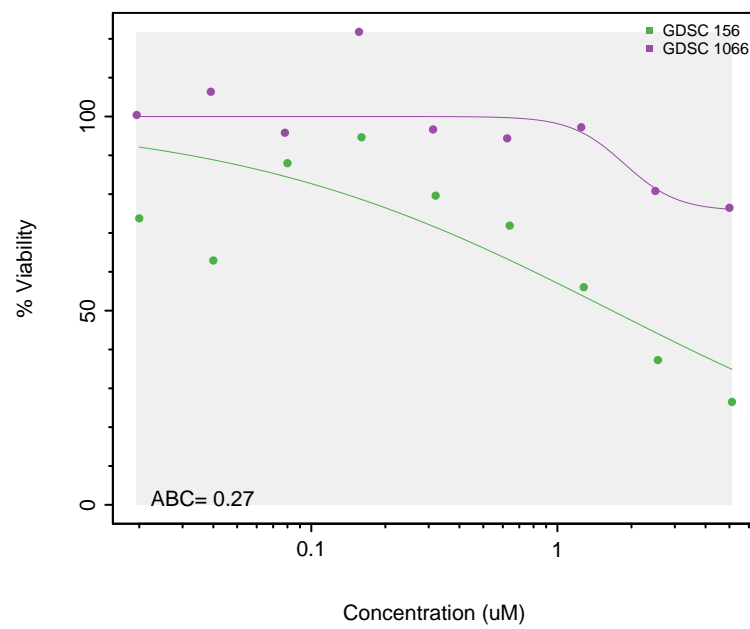

AZD6482:NCI-SNU-5

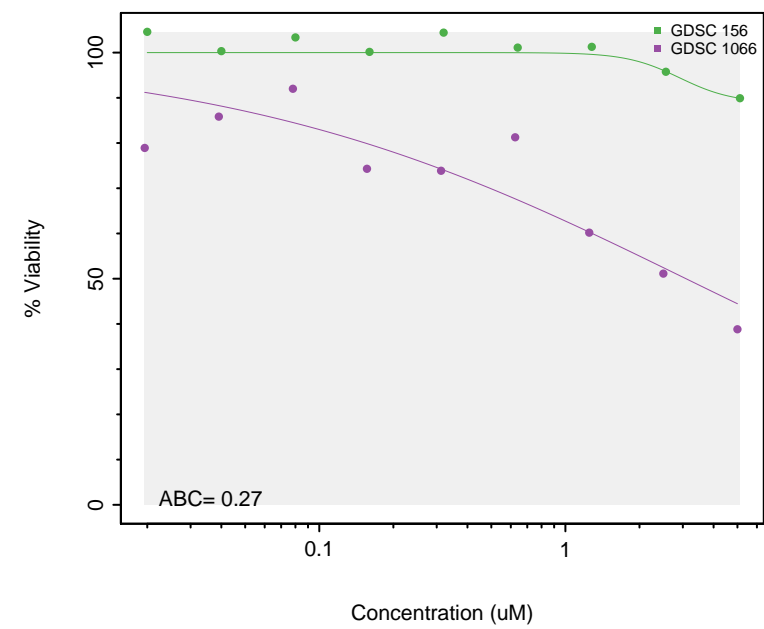

AZD6482:BE-13

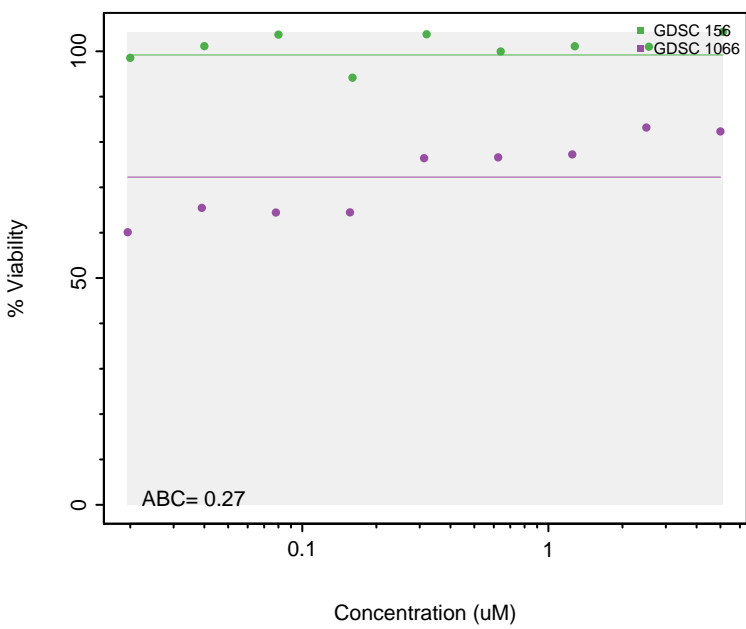

AZD6482:Ramos-2G6-4C10

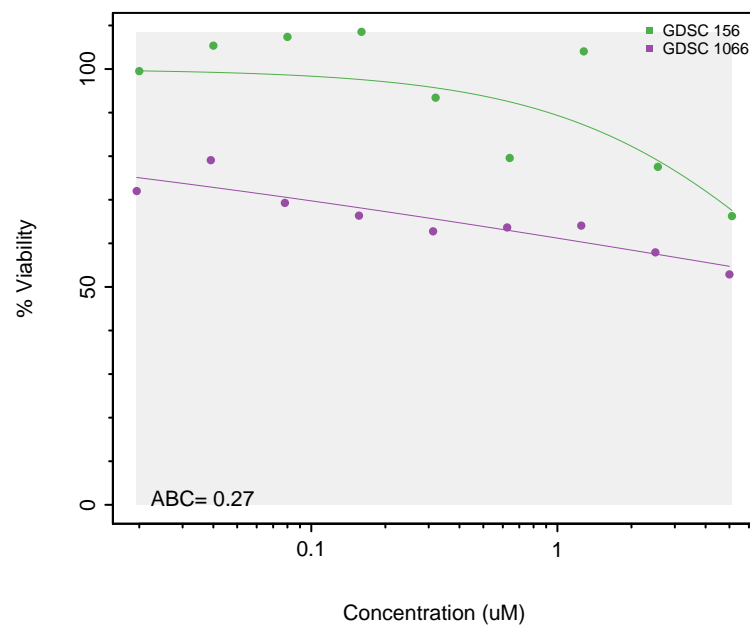

AZD6482:MC116

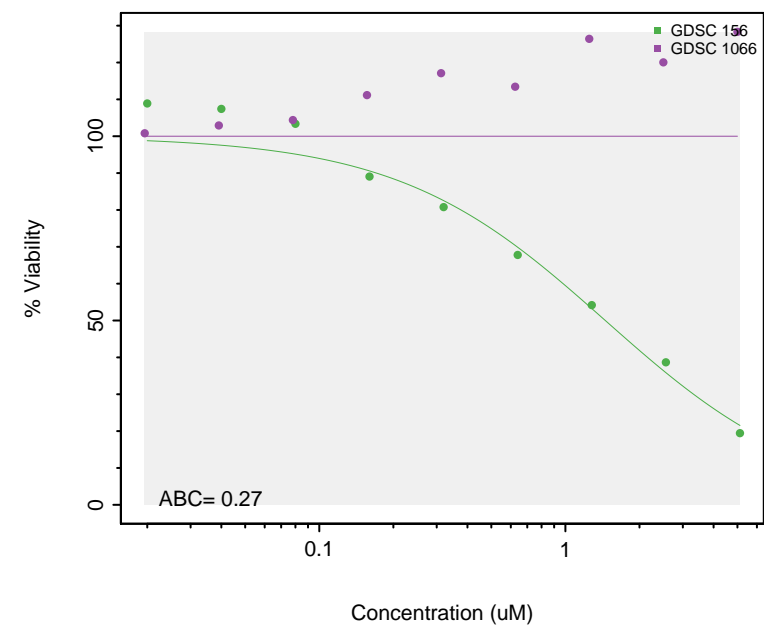

AZD6482:ALL-PO

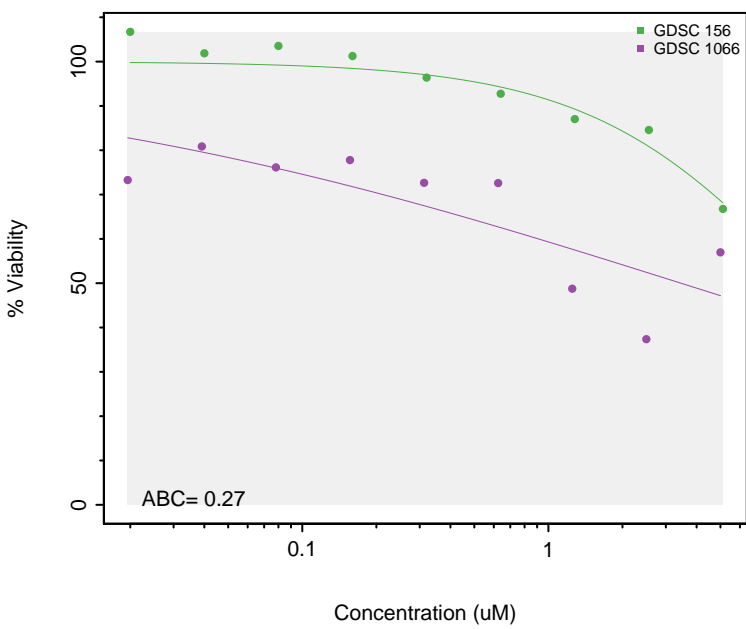

AZD6482:DMS-273

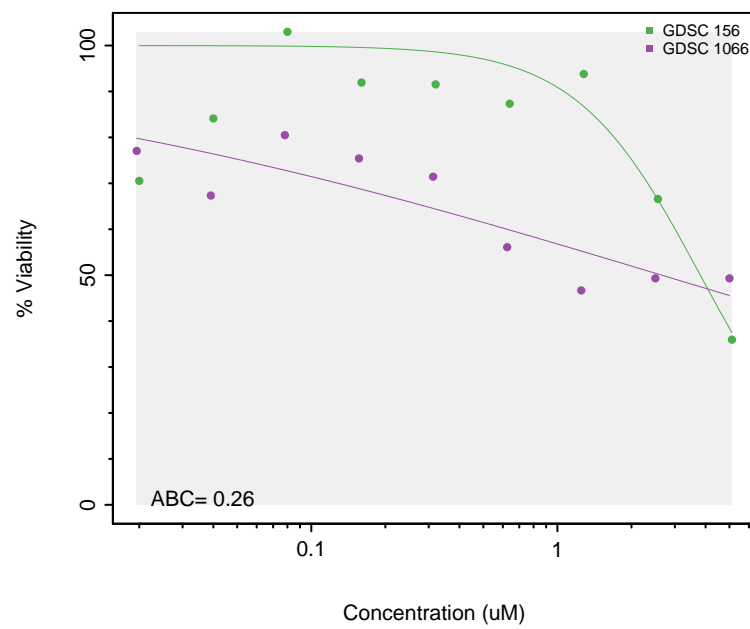

AZD6482:NCI-H1395

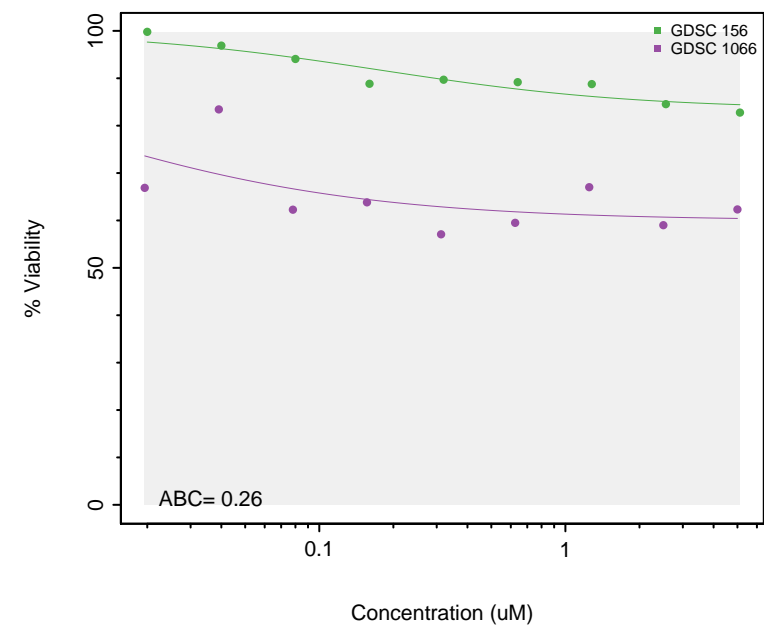

AZD6482:A704

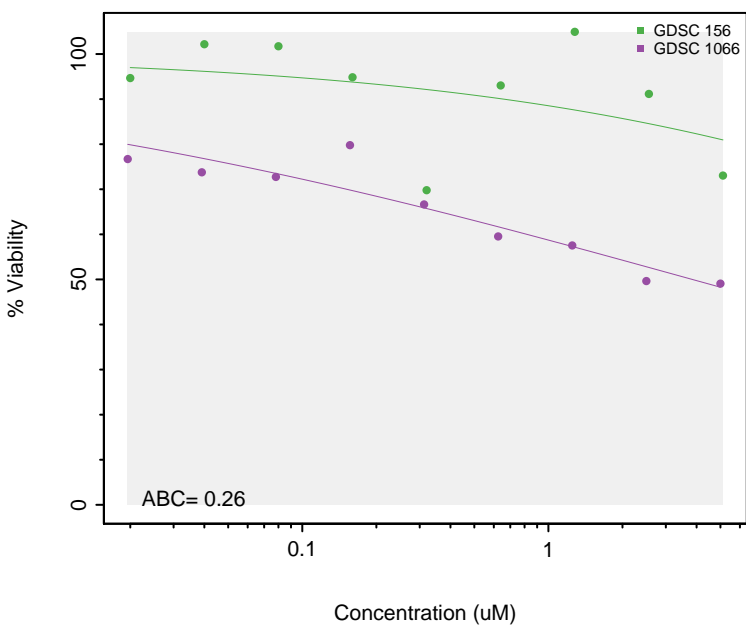

AZD6482:GDM-1

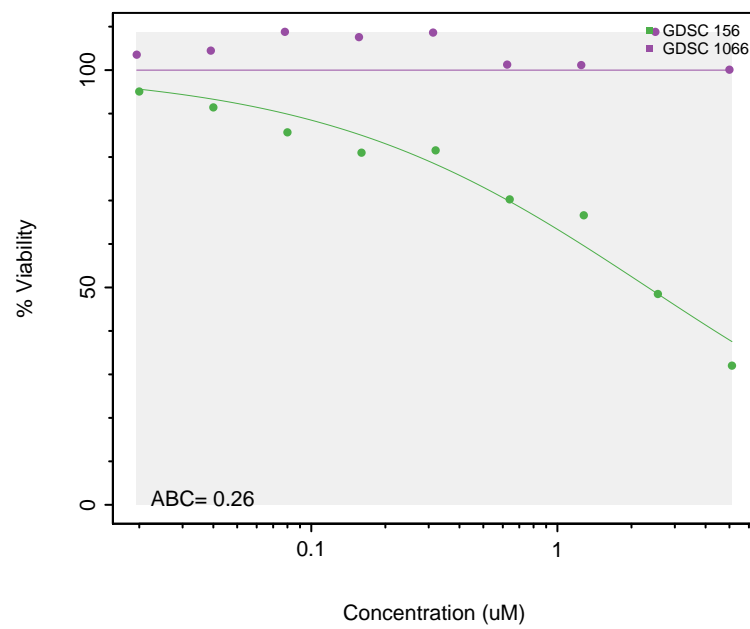

AZD6482:Panc 10.05

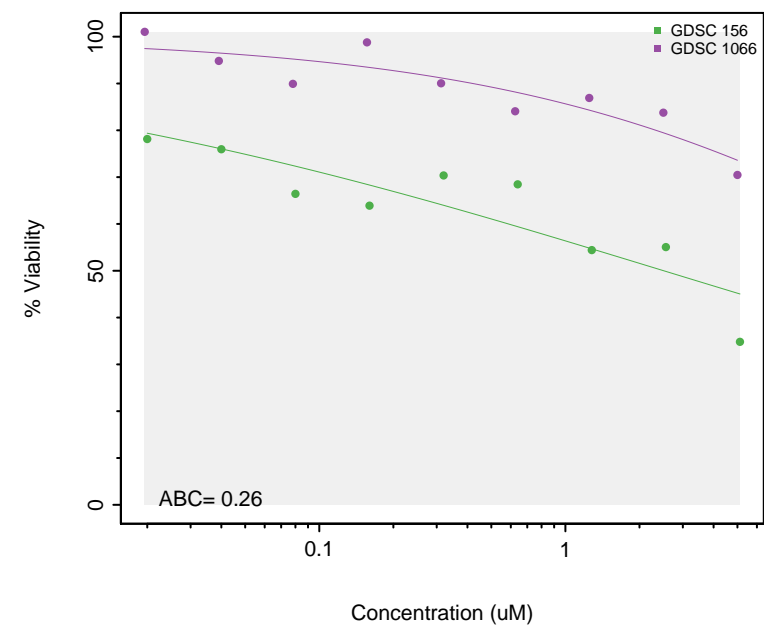

AZD6482:JVM-3

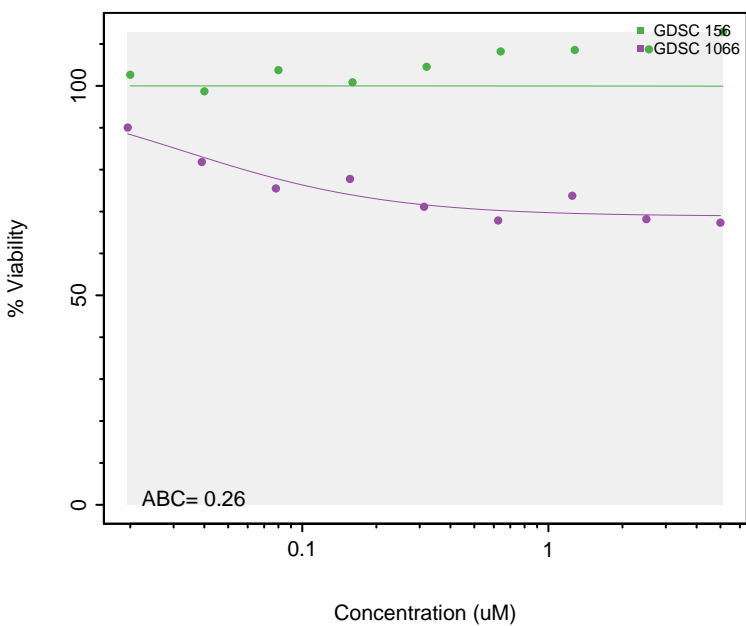

AZD6482:KY821

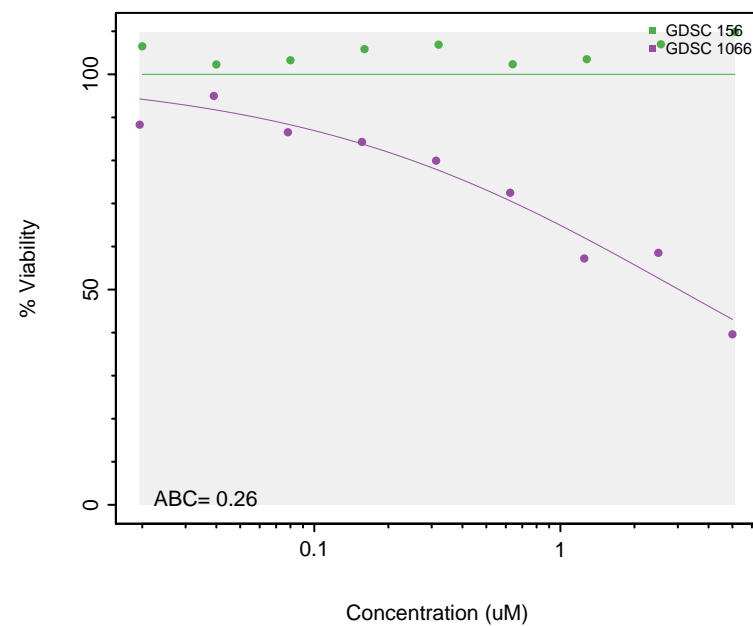

AZD6482:LC4-1

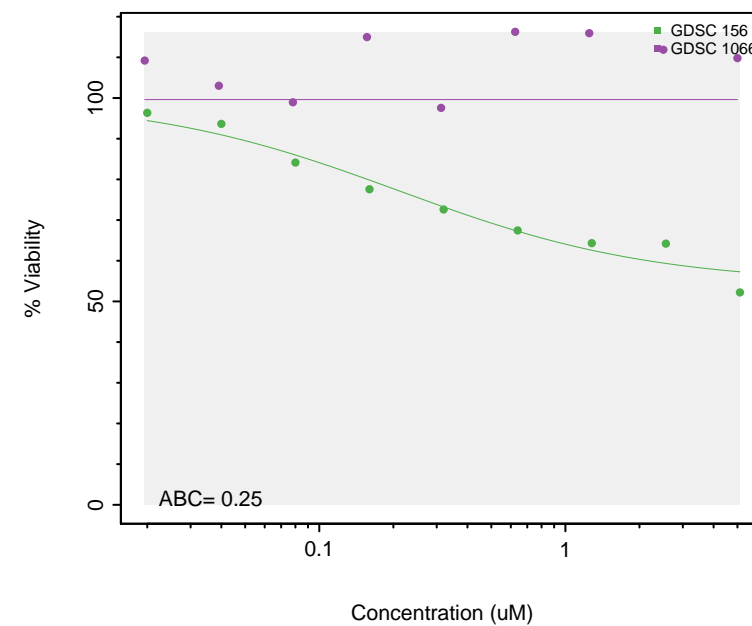

AZD6482:SK-MES-1

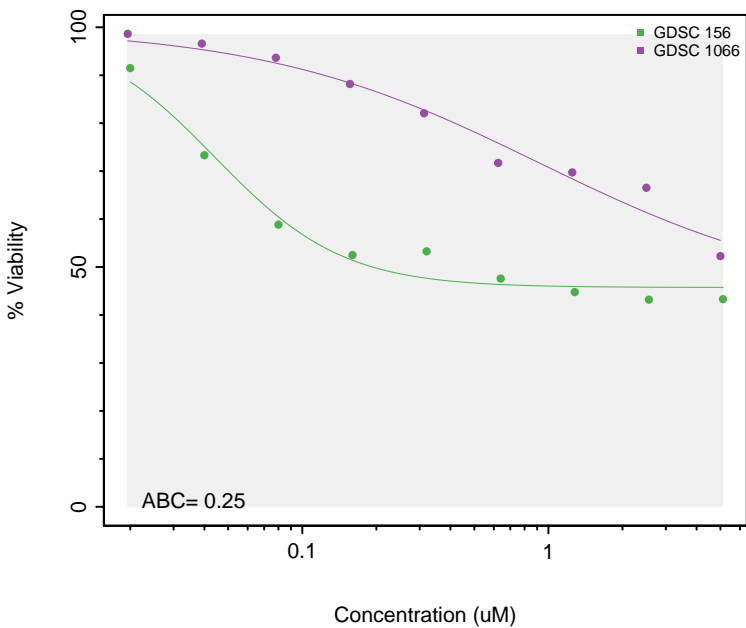

AZD6482:ARH-77

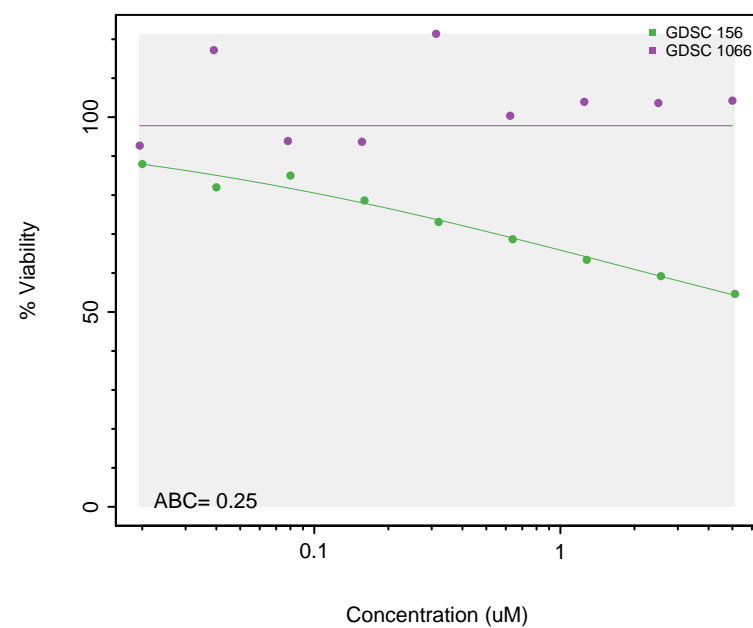

AZD6482:Ca-Ski

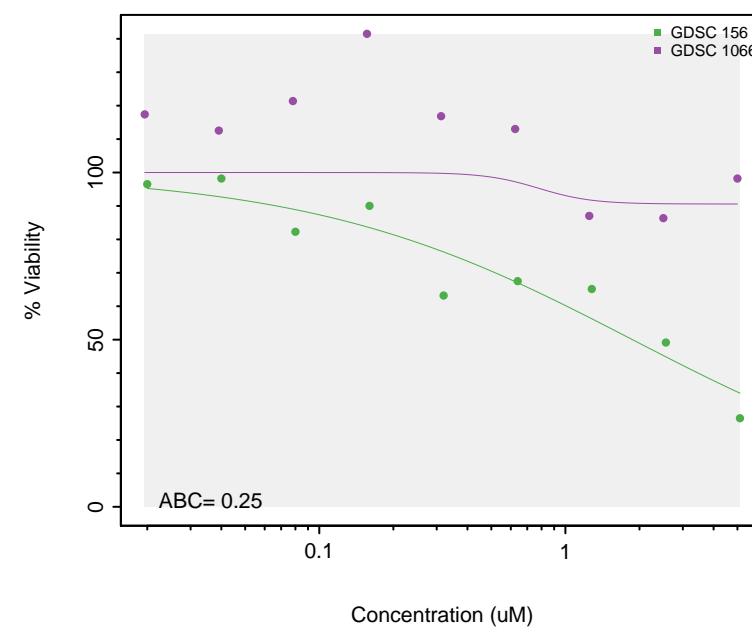

AZD6482:SF126

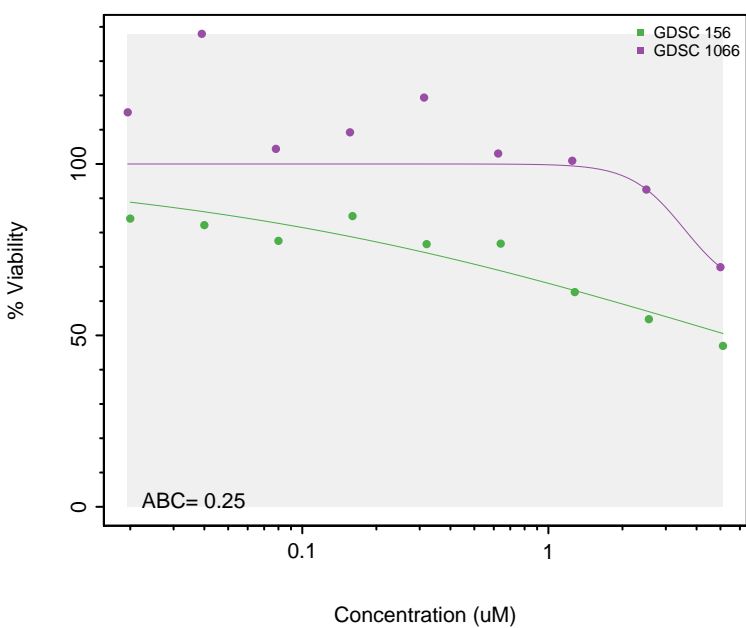

AZD6482:SK-OV-3

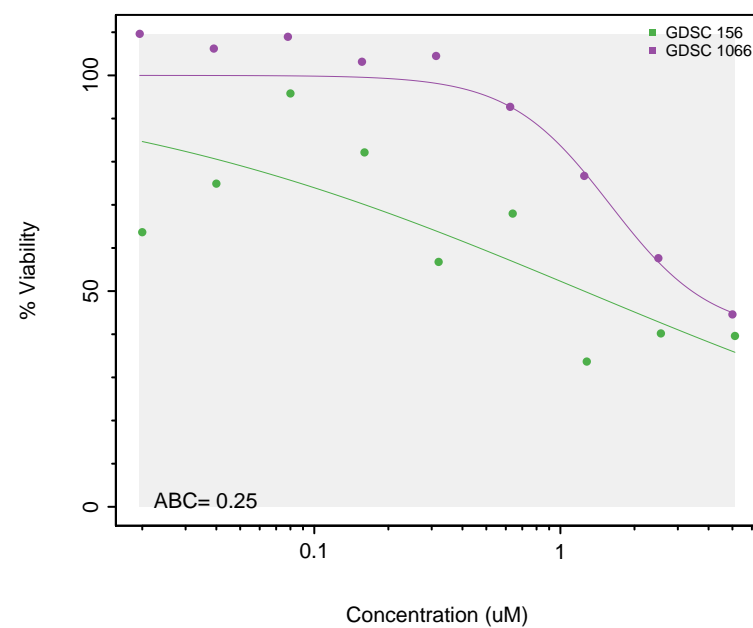

AZD6482:Mo-T

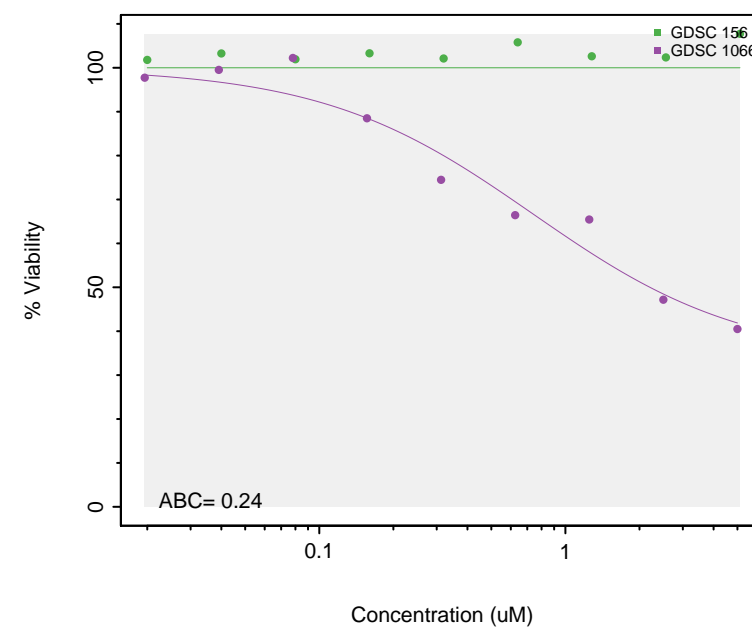

AZD6482:no-11

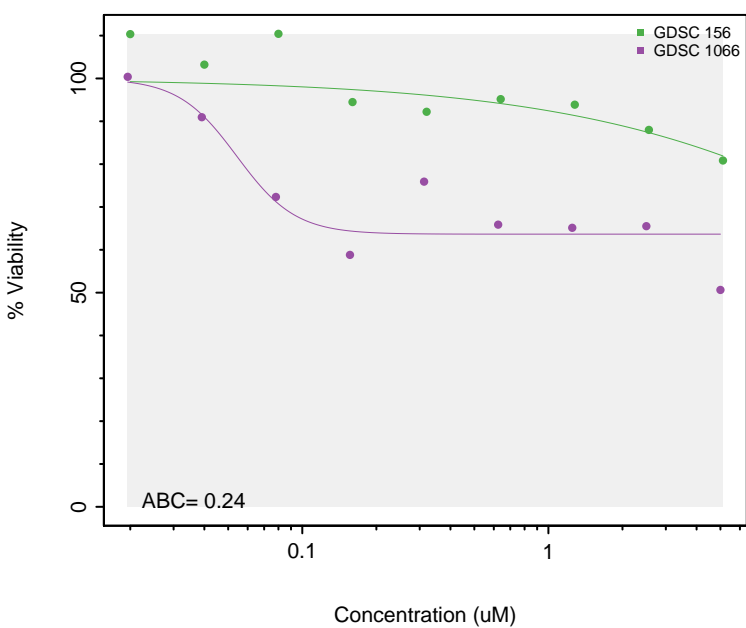

AZD6482:H4

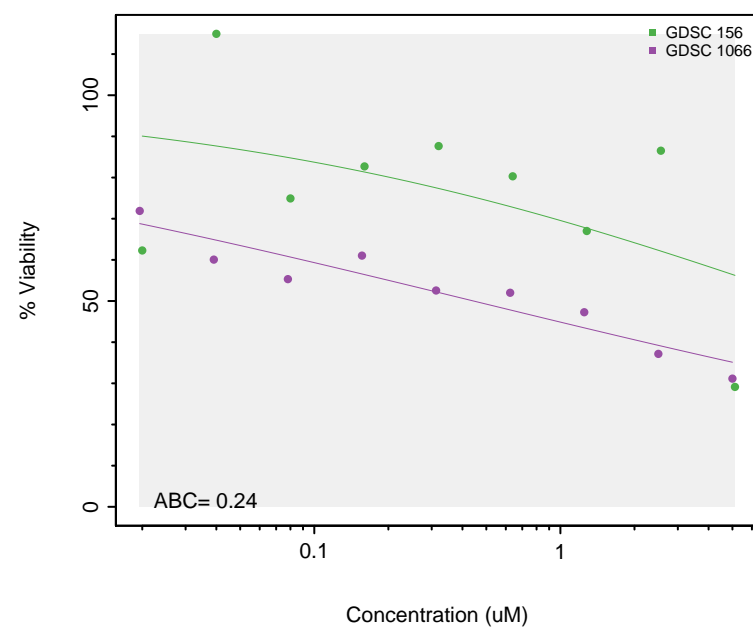

AZD6482:NCI-H1299

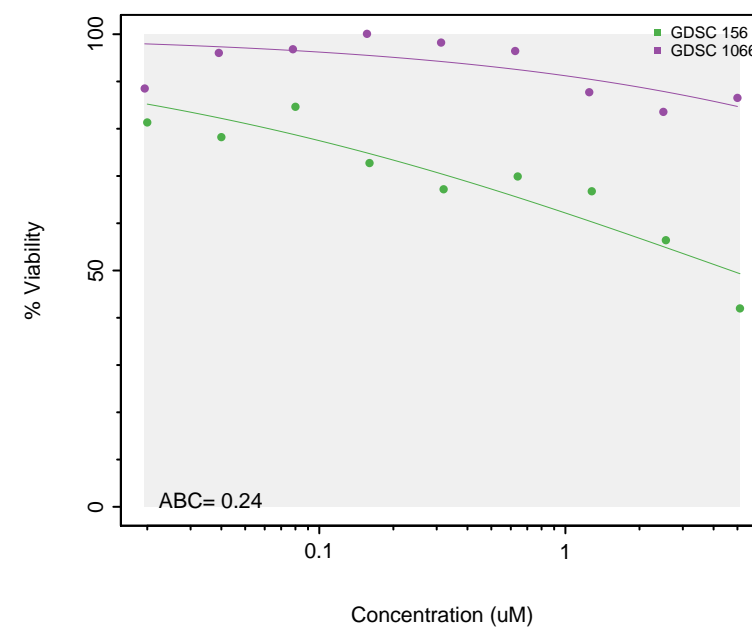

AZD6482:DK-MG

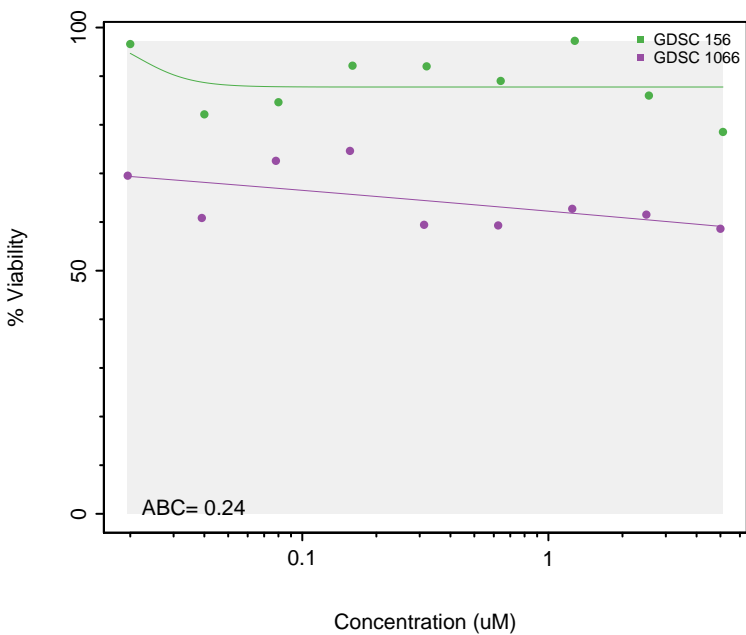

AZD6482:NCI-H1975

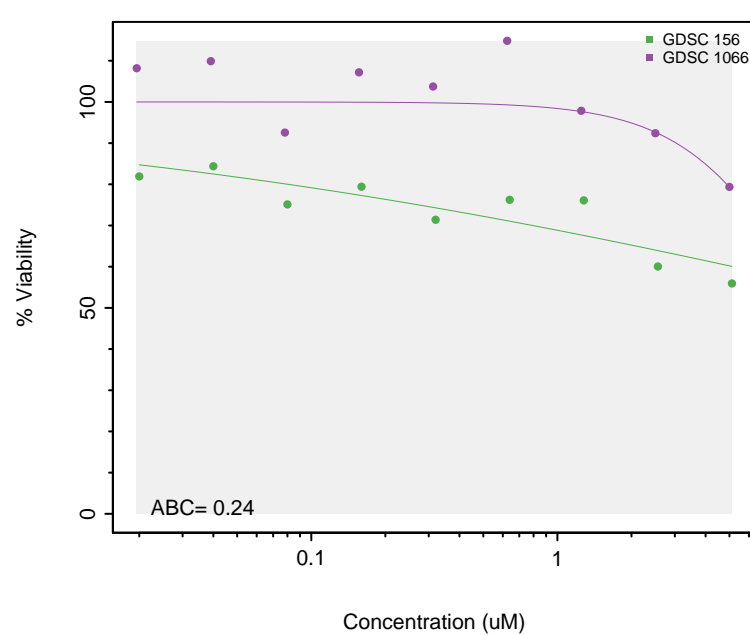

AZD6482:CAL-27

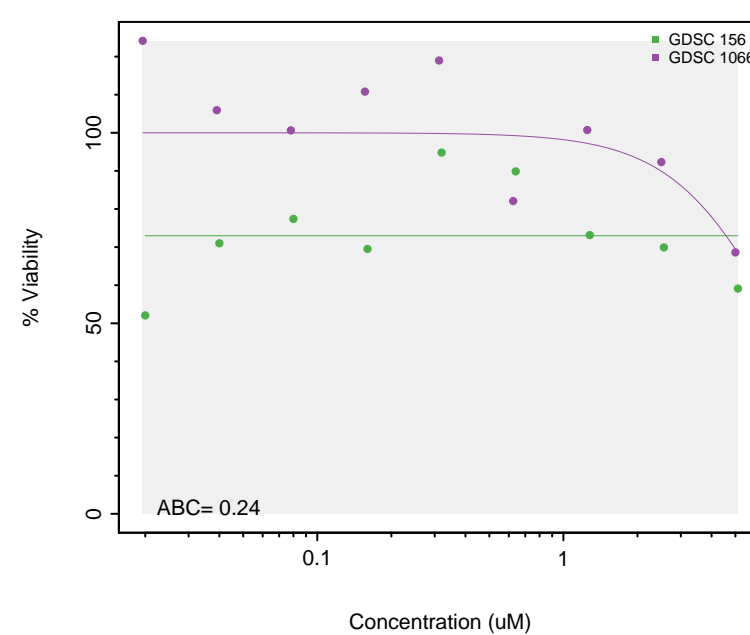

AZD6482:KU812

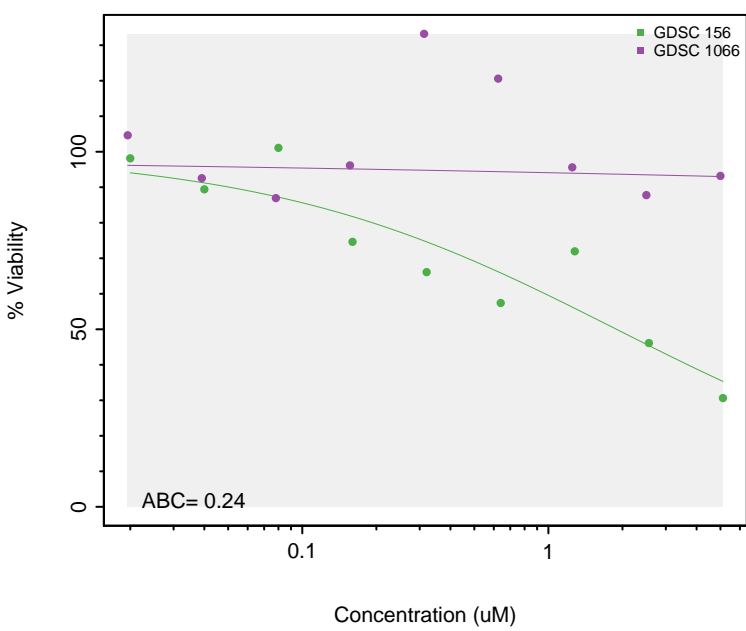

AZD6482:MZ1-PC

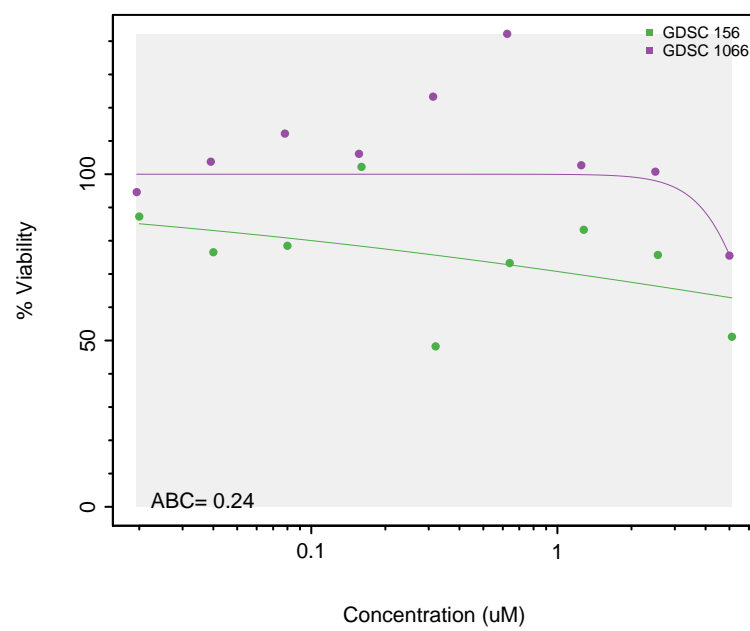

AZD6482:NALM-6

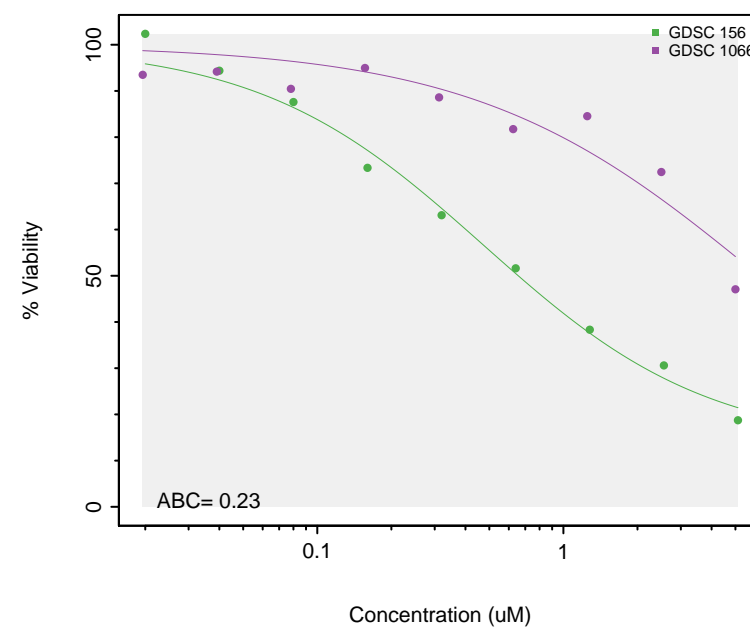

AZD6482:CAMA-1

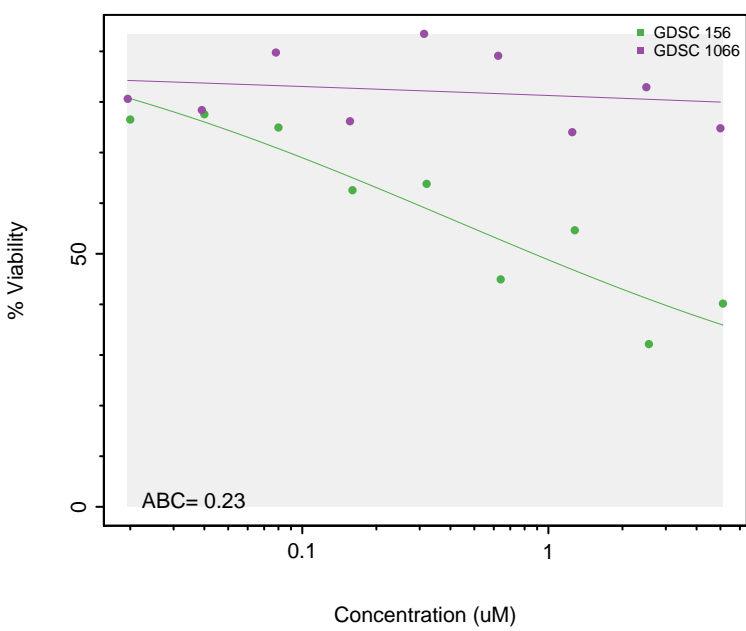

AZD6482:CFPAC-1

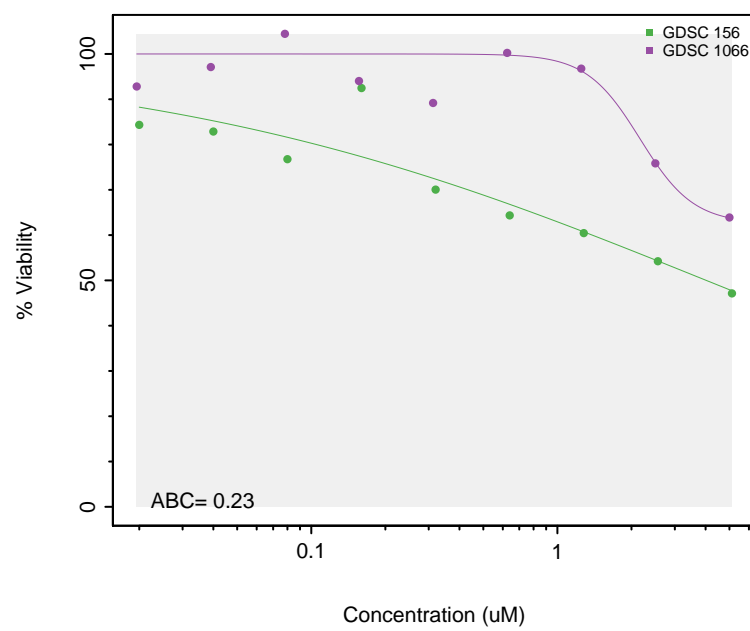

AZD6482:HuP-T4

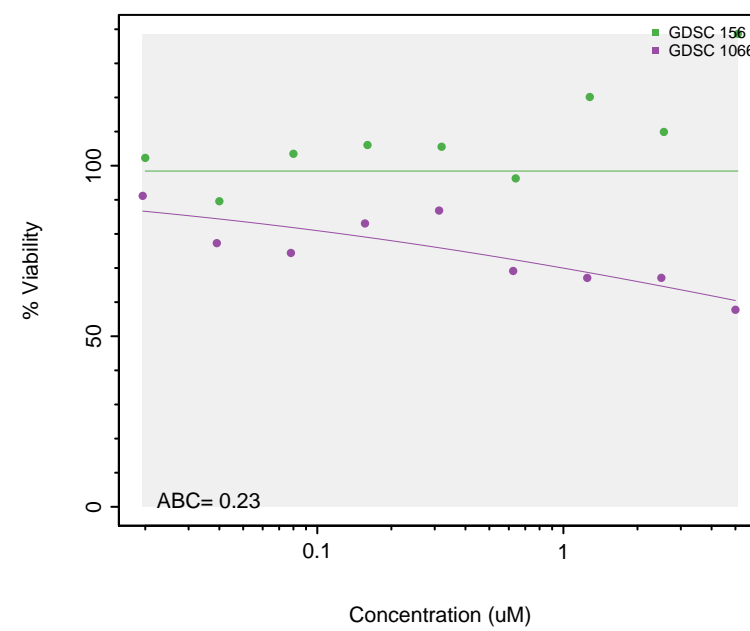

AZD6482:GB-1

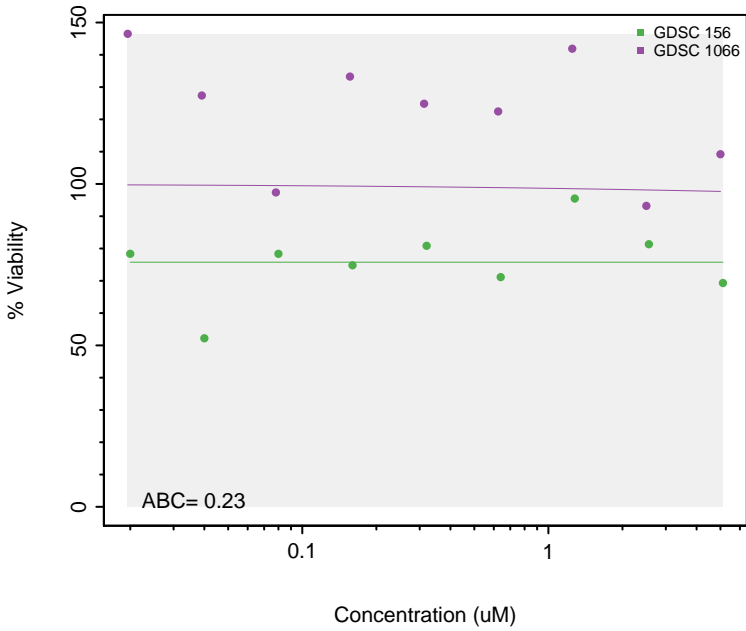

AZD6482:CHL-1

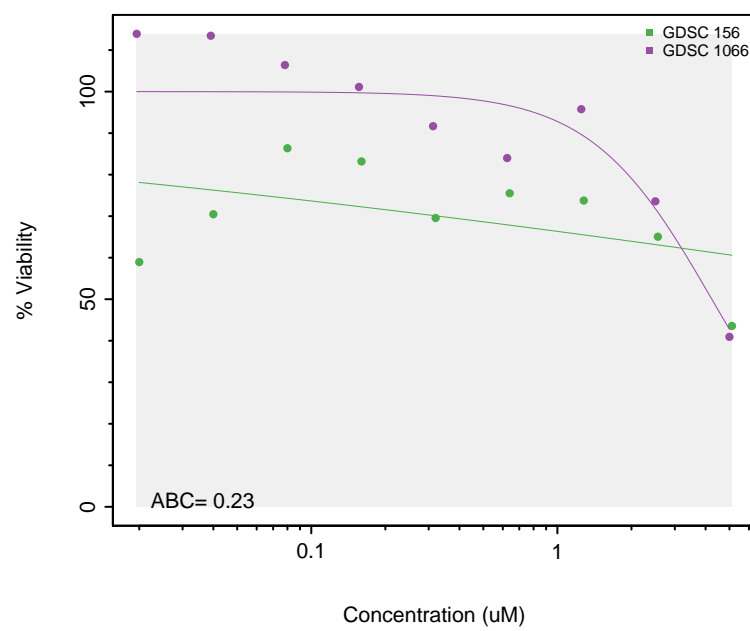

AZD6482:GR-ST

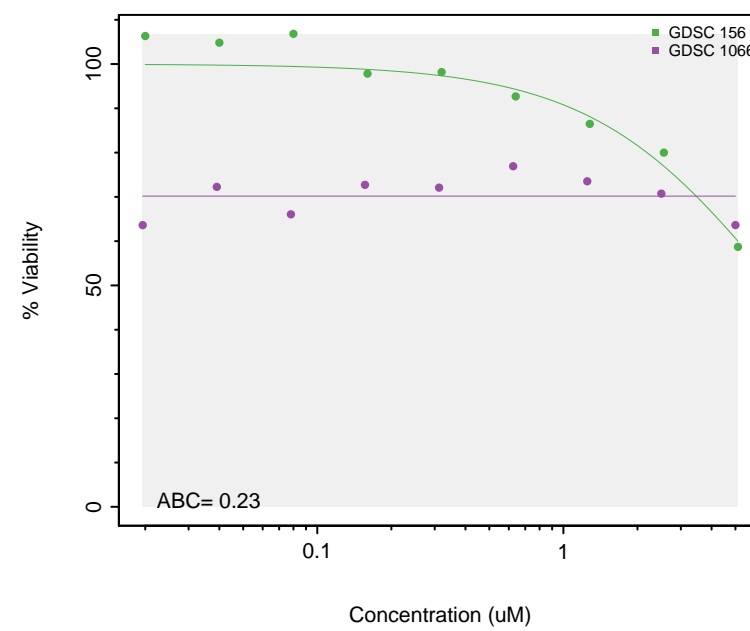

AZD6482:CGTH-W-1

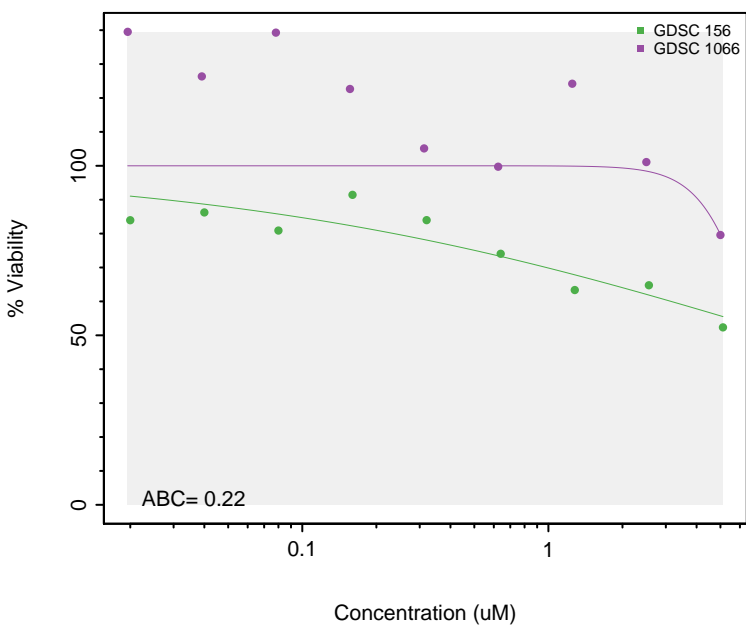

AZD6482:SF295

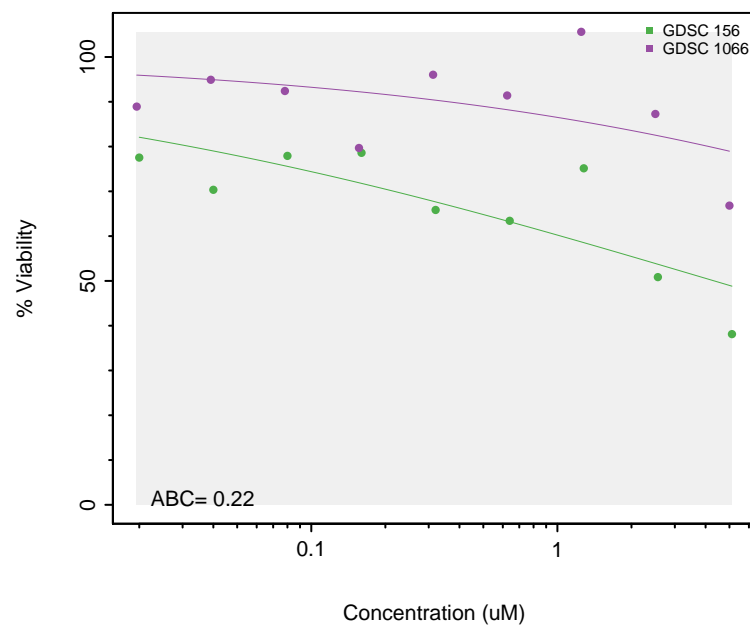

AZD6482:NCI-H1793

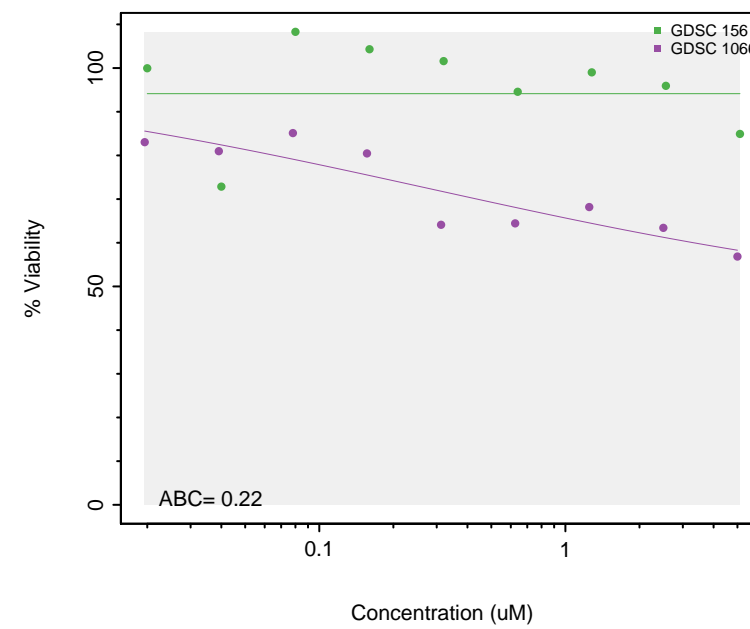

AZD6482:A431

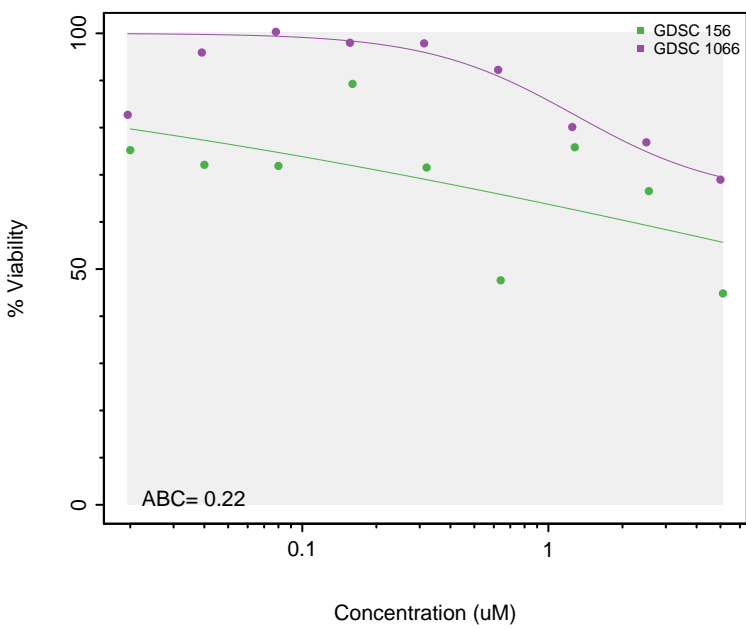

AZD6482:RCM-1

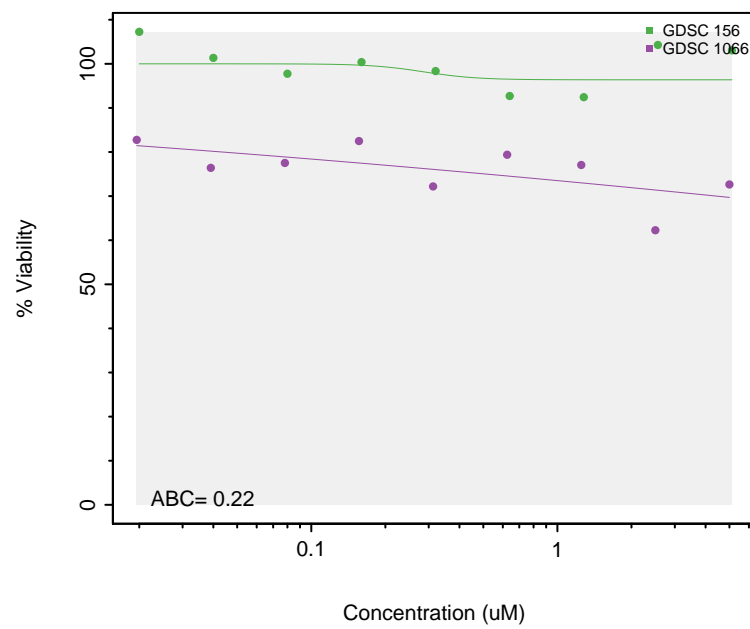

AZD6482:HCT-116

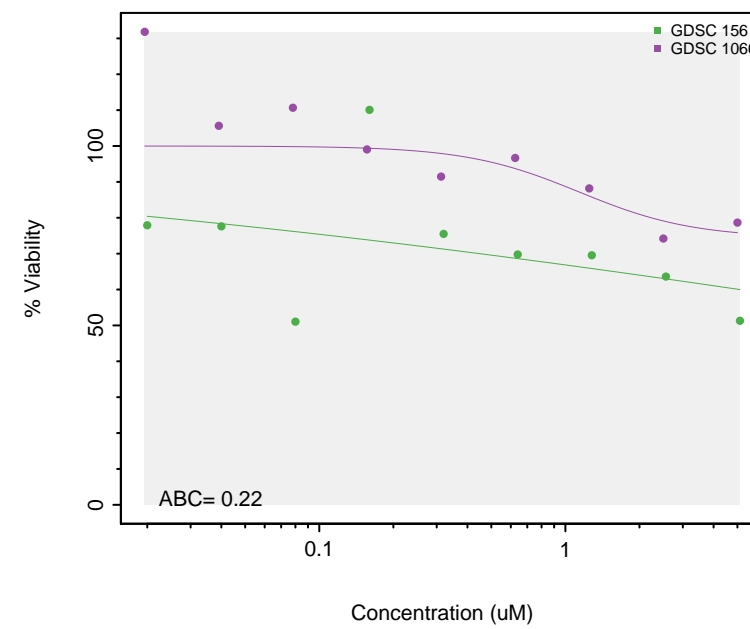

AZD6482:LoVo

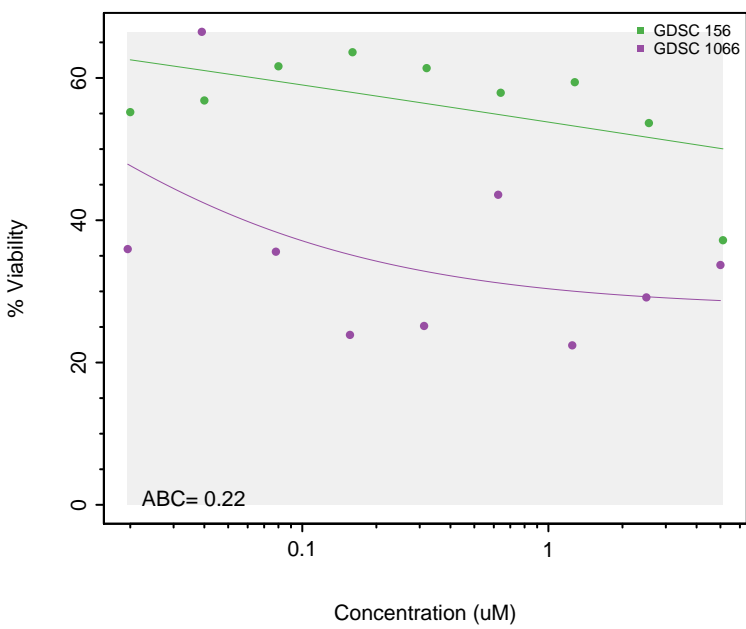

AZD6482:G-402

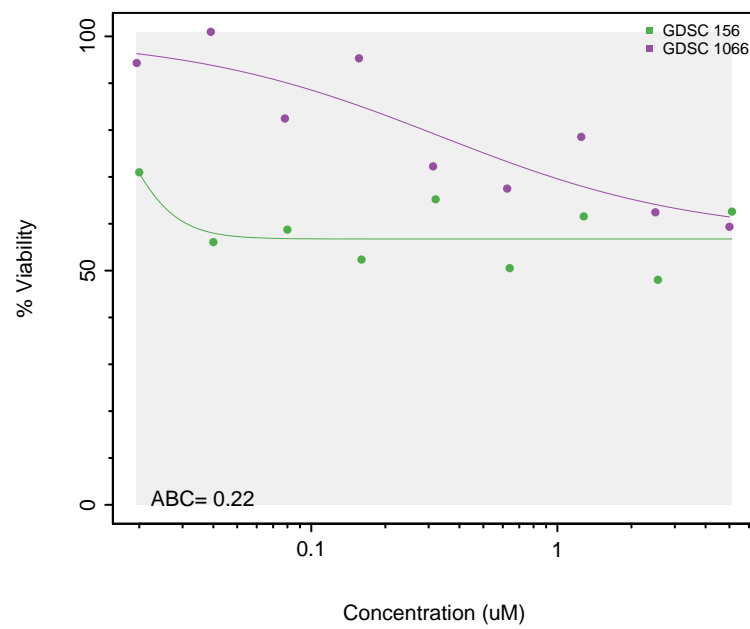

AZD6482:NCI-H2452

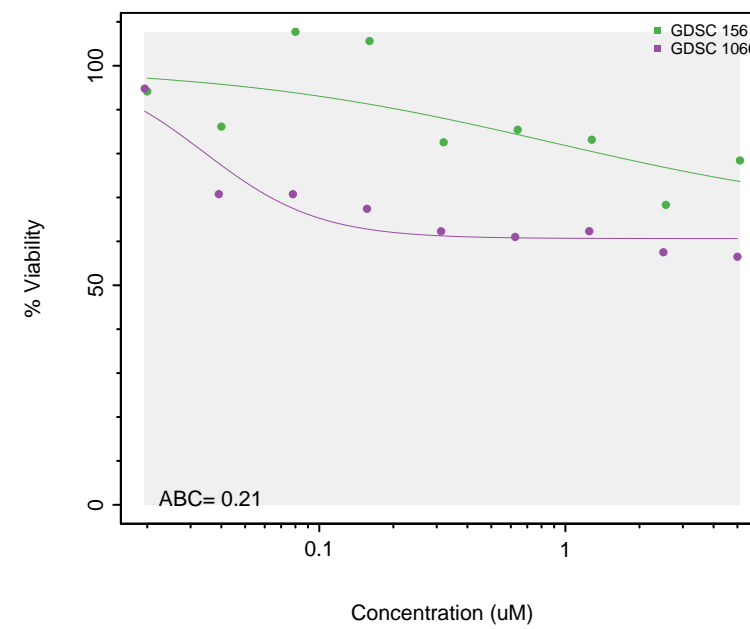

AZD6482:MDA-MB-453

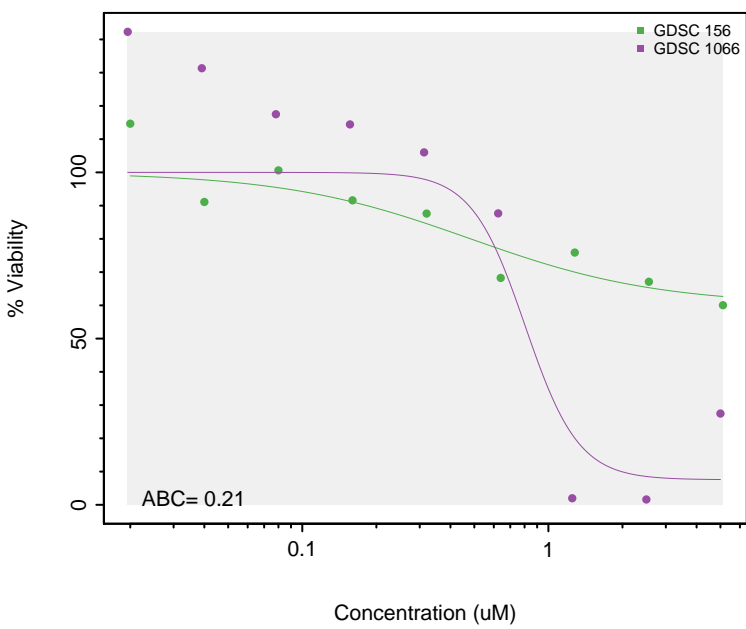

AZD6482:RPMI-2650

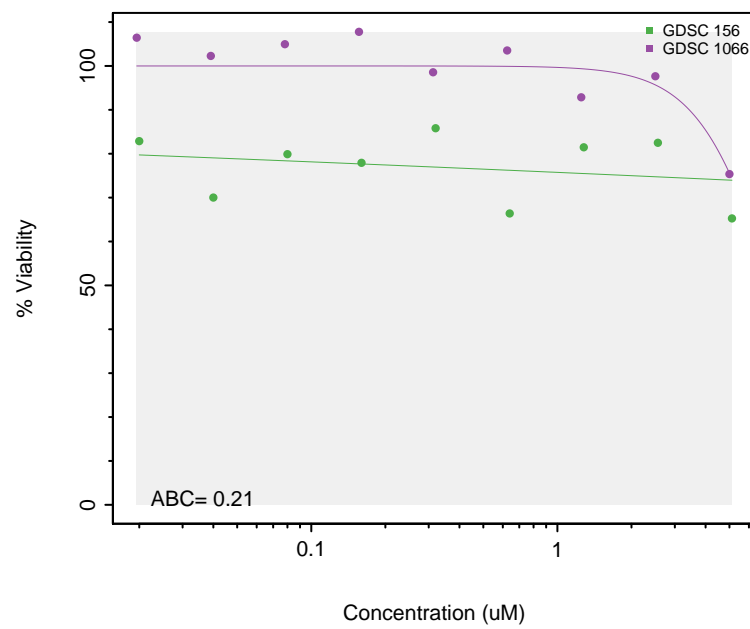

AZD6482:ES6

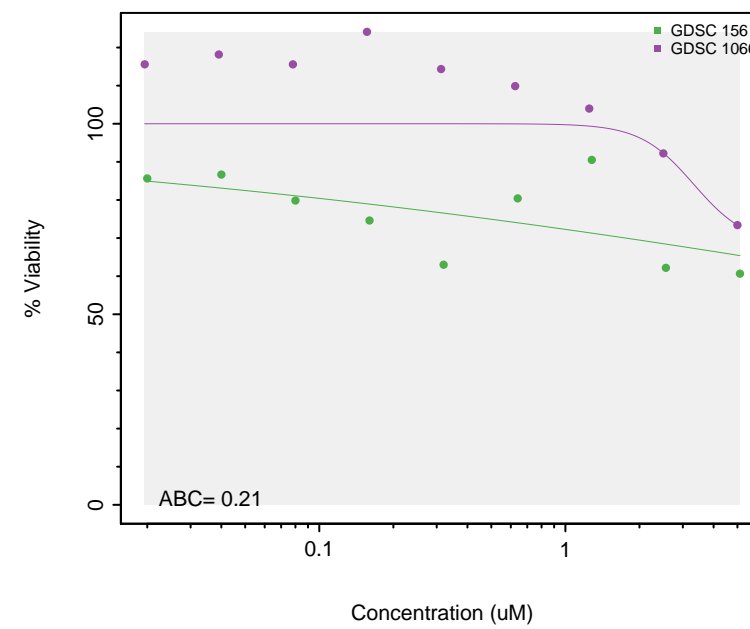

AZD6482:LB2241-RCC

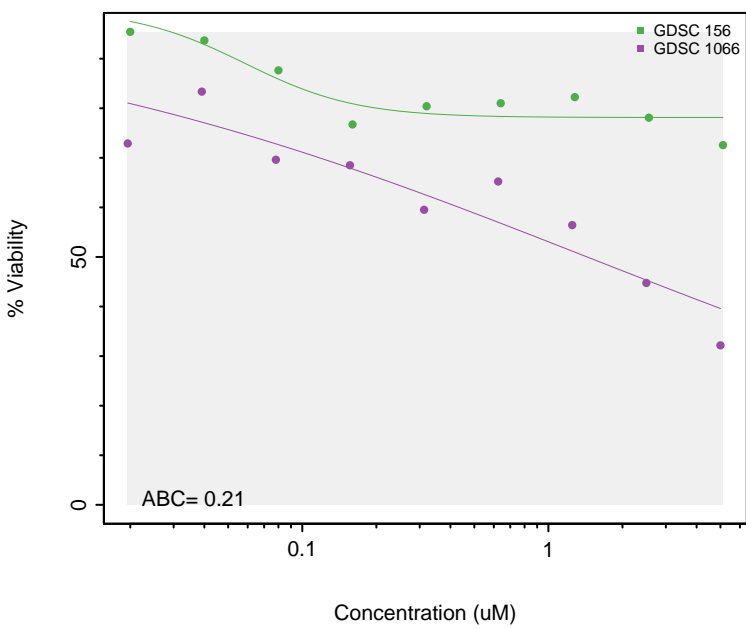

AZD6482:NB12

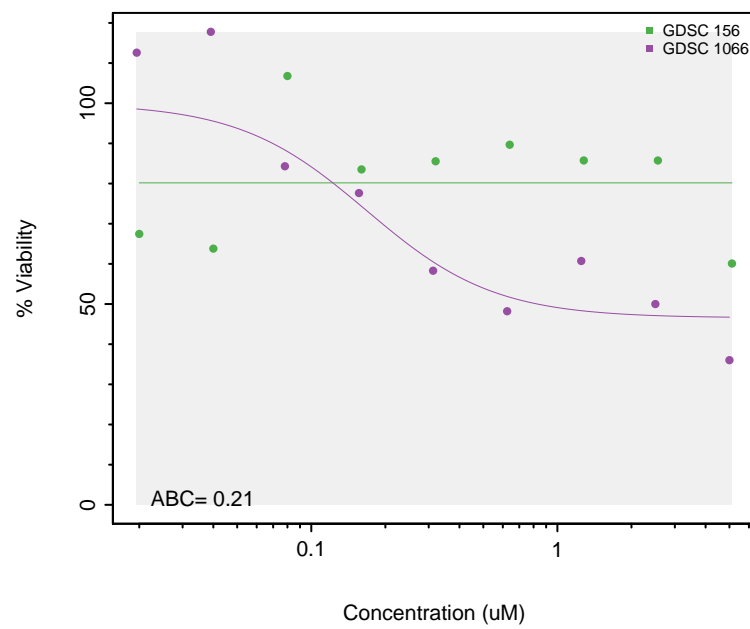

AZD6482:VMRC-RCZ

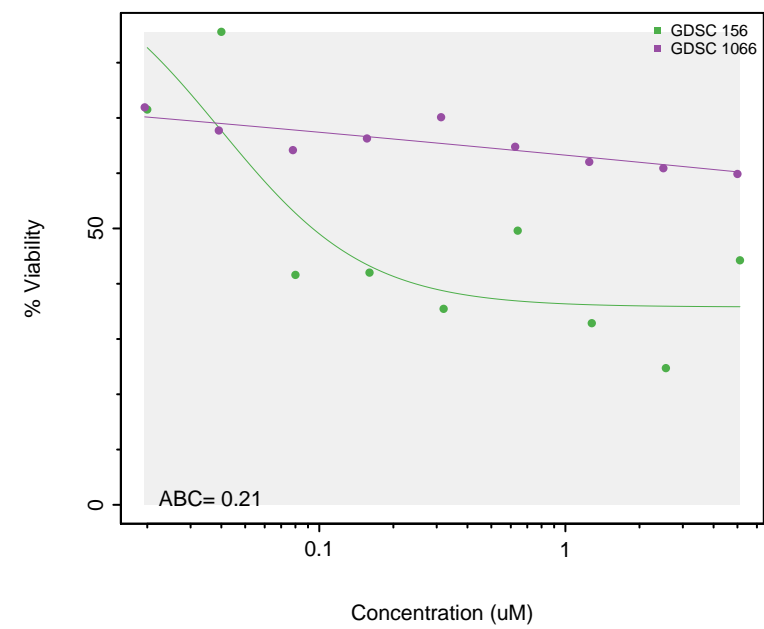

AZD6482:EW-16

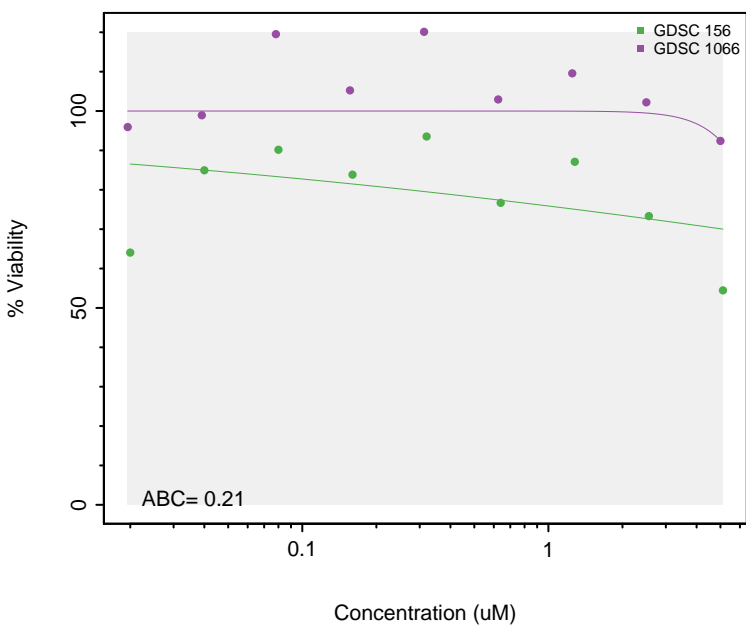

AZD6482:NCI-H2087

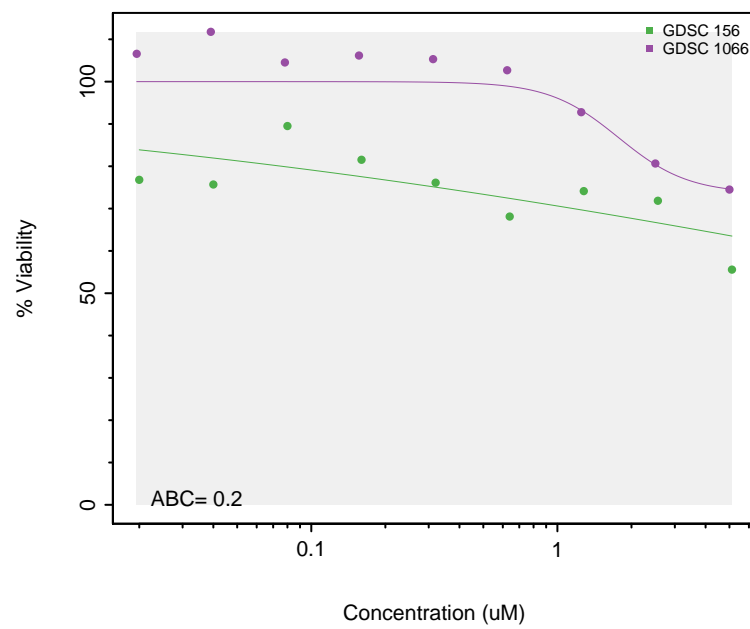

AZD6482:MDA-MB-175-VII

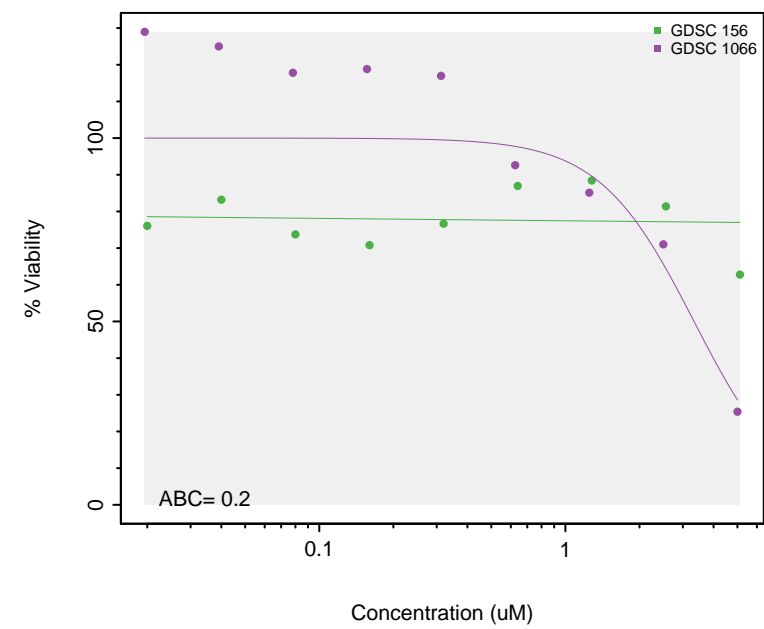

AZD6482:HL-60

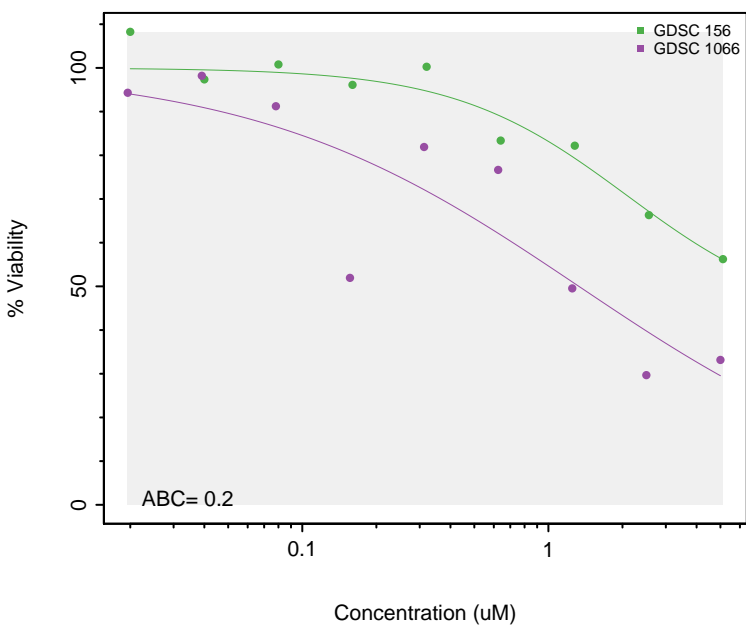

AZD6482:RMG-I

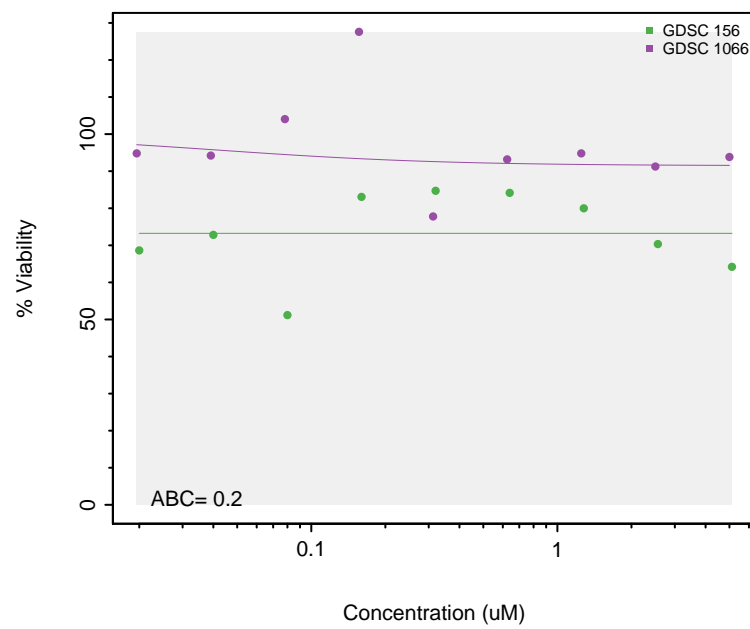

AZD6482:GI-1

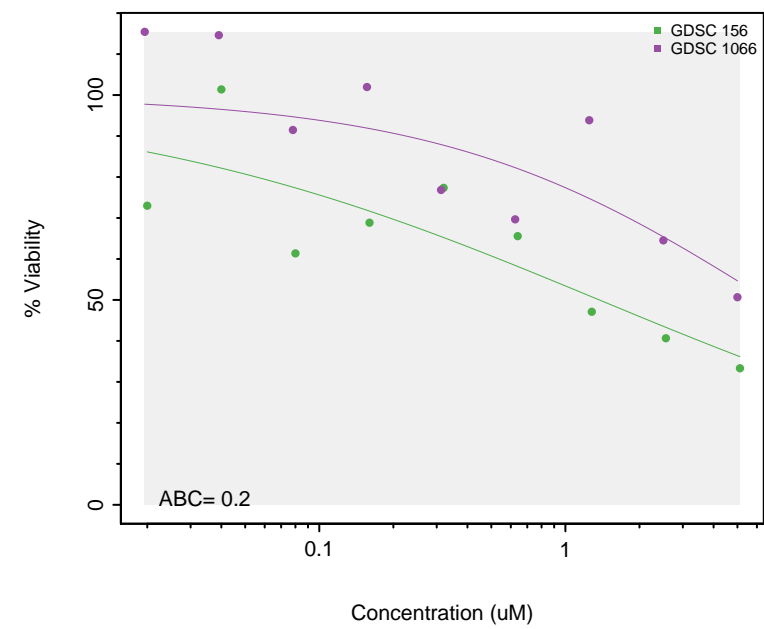

AZD6482:BB65-RCC

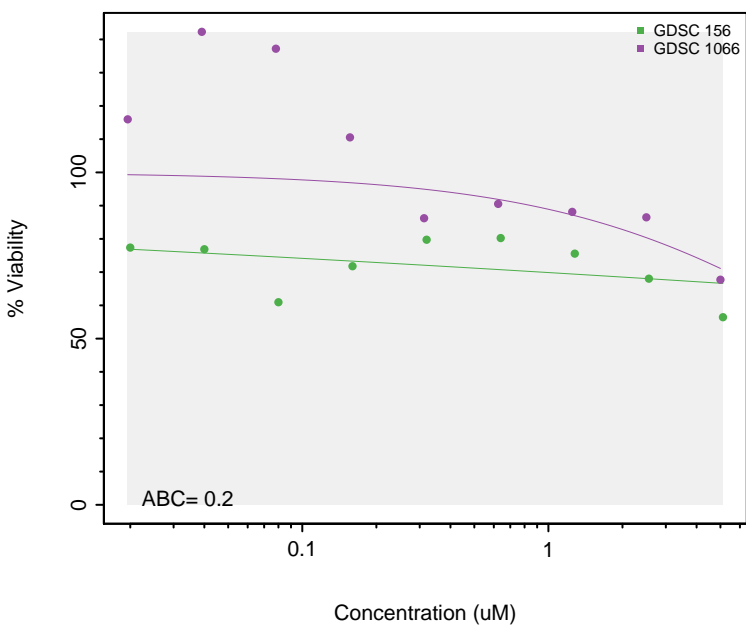

AZD6482:HN

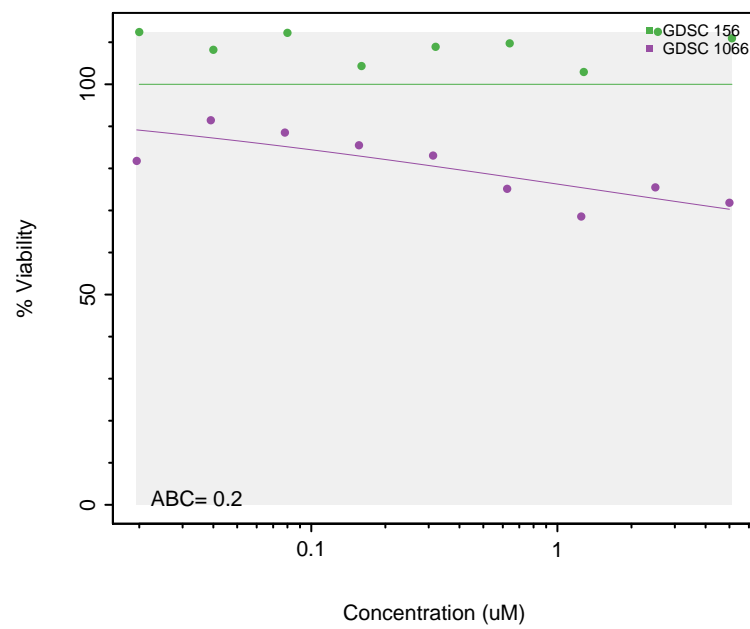

AZD6482:HucCT1

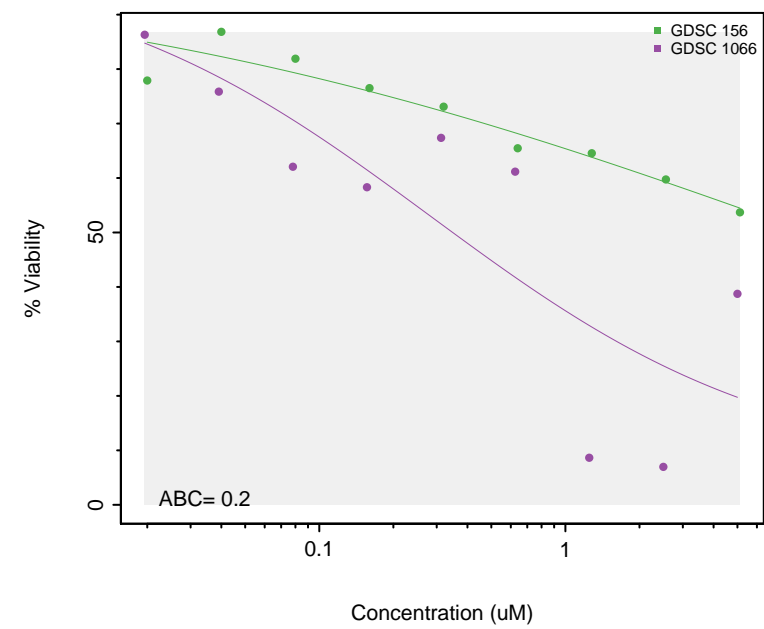



AZD6482:Calu-3

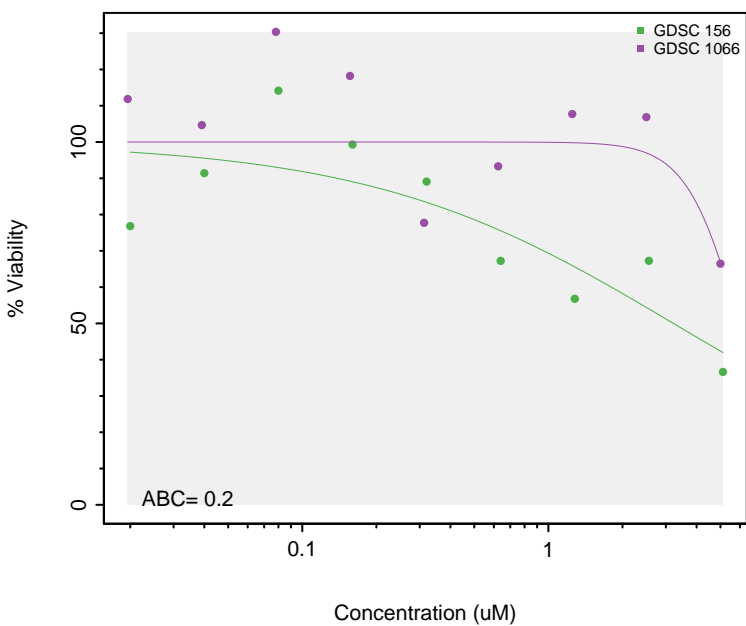

AZD6482:D-283MED

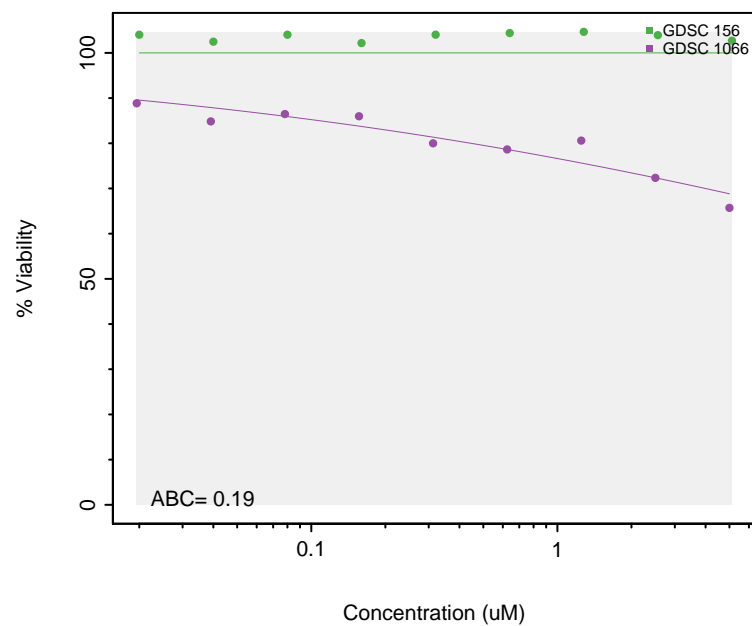

AZD6482:CaR-1

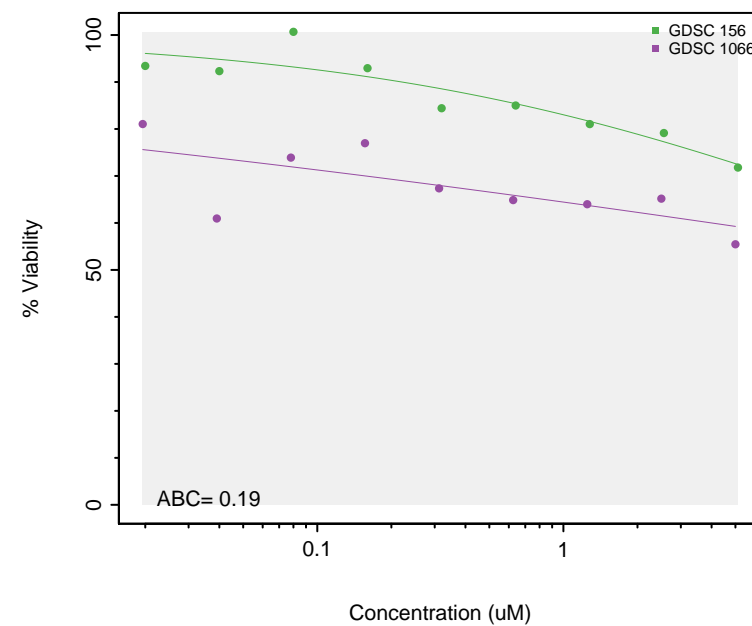

AZD6482:HC-1

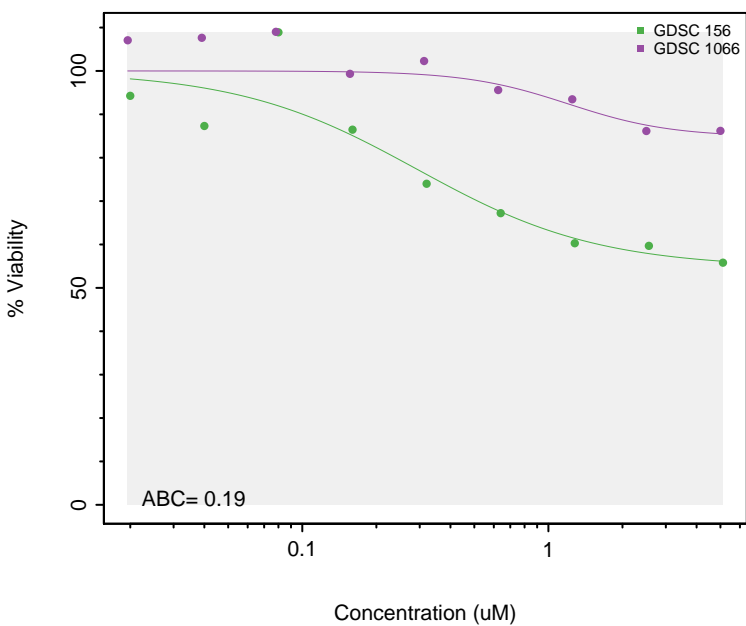

AZD6482:SK-N-DZ

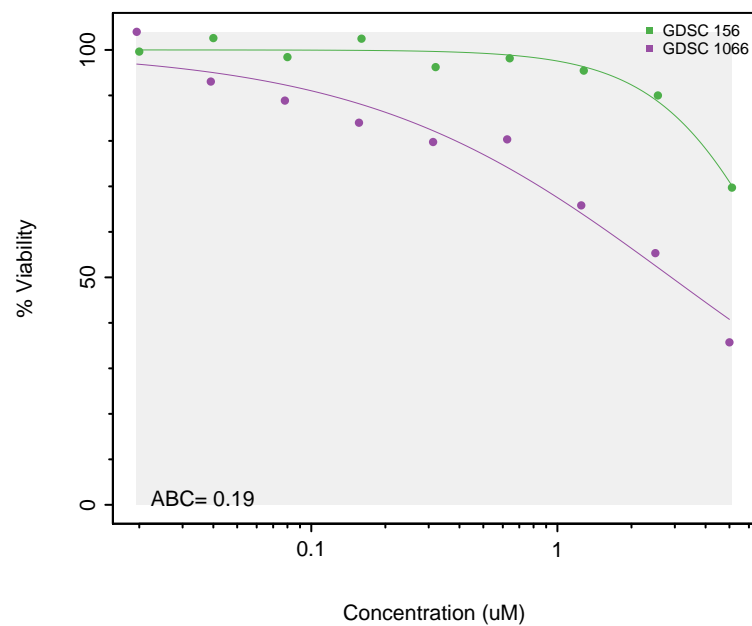

AZD6482:HH

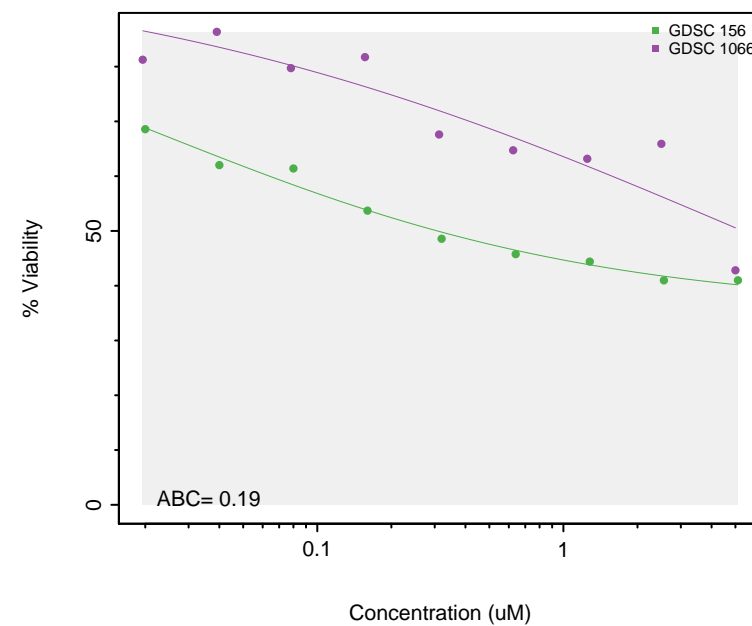

AZD6482:HGC-27

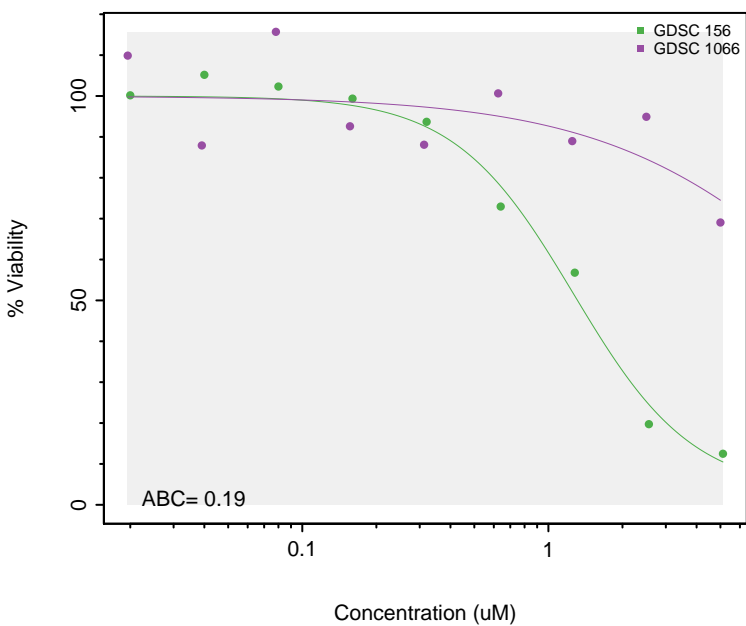

AZD6482:EKVX

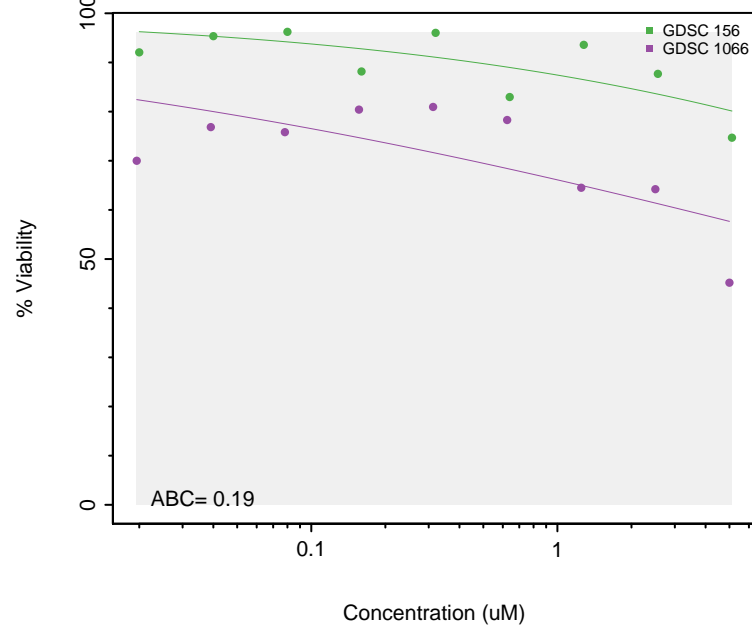

AZD6482:GCIY

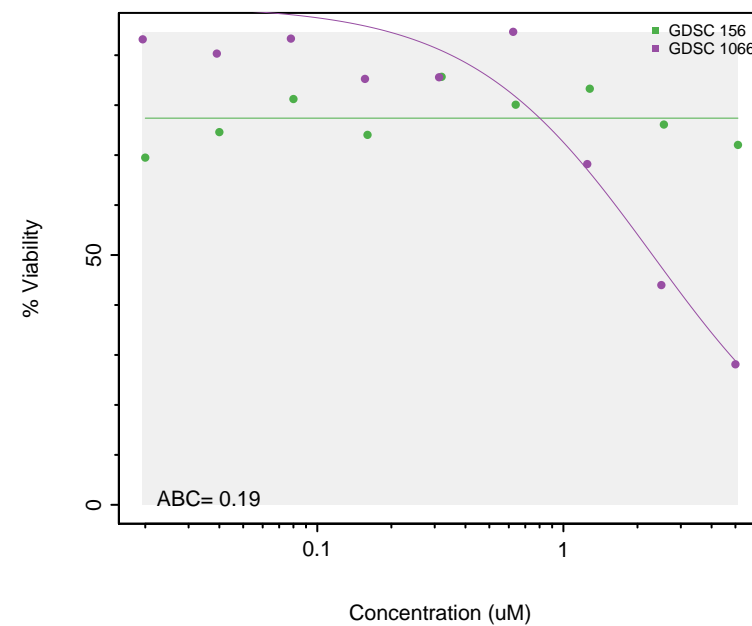

AZD6482:U251

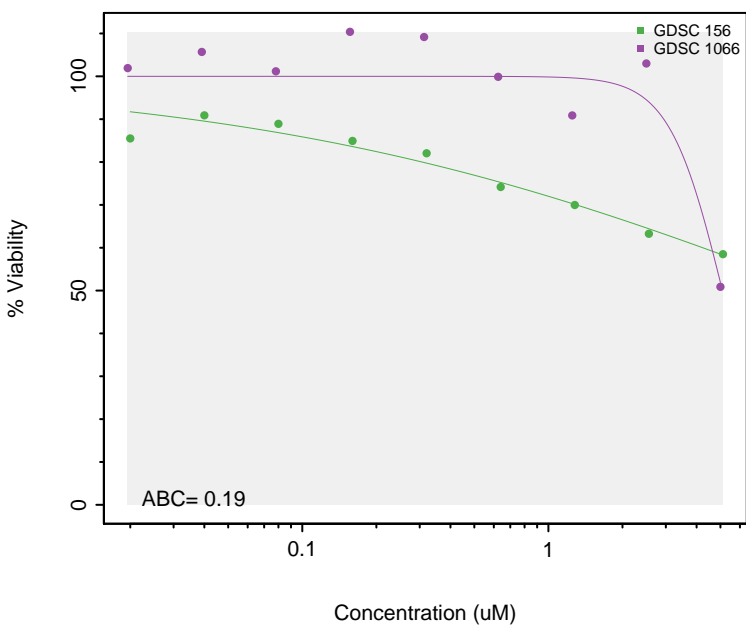

AZD6482:NCI-H661

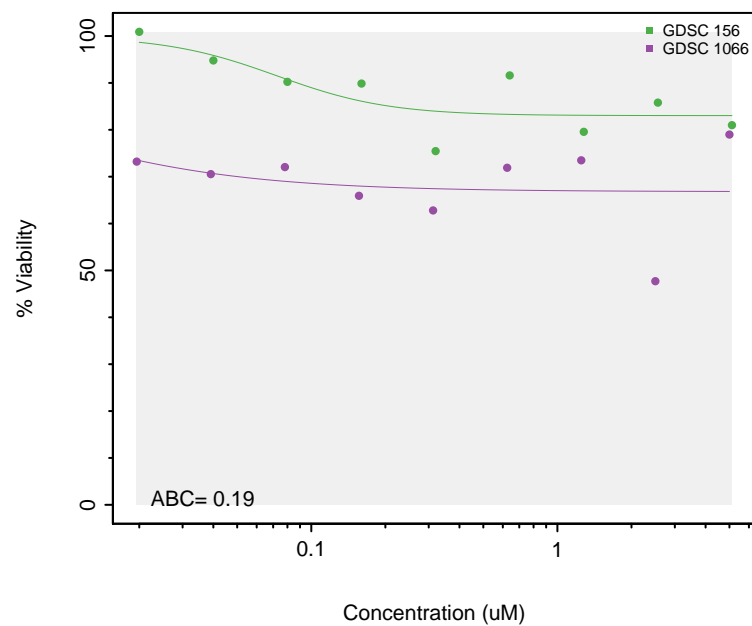

AZD6482:HT-1080

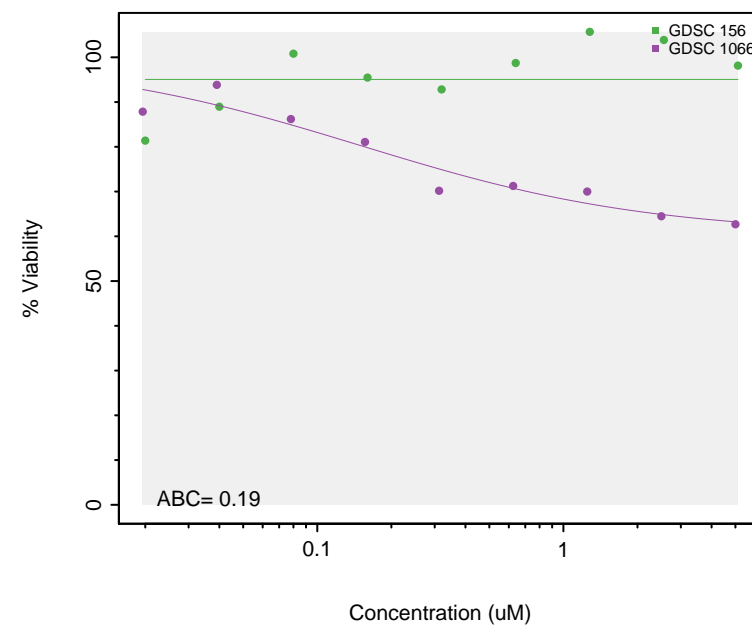

AZD6482:DBTRG-05MG

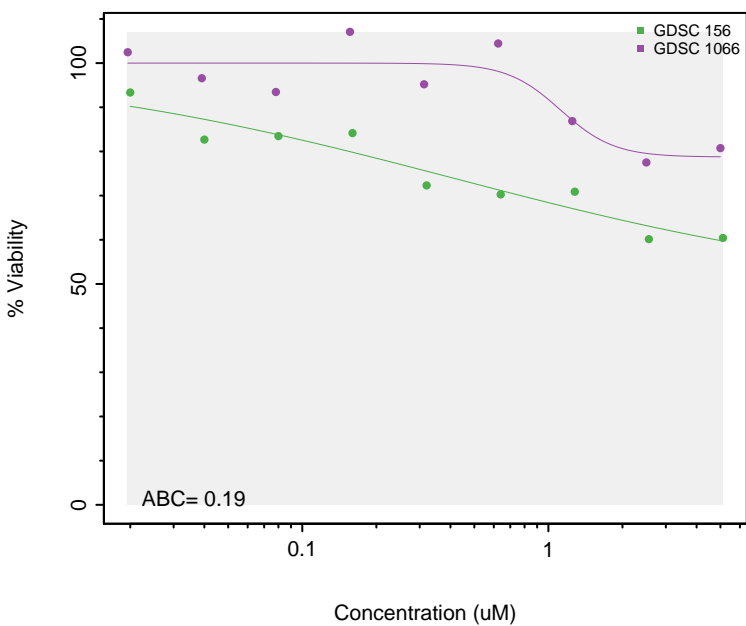

AZD6482:HCC1569

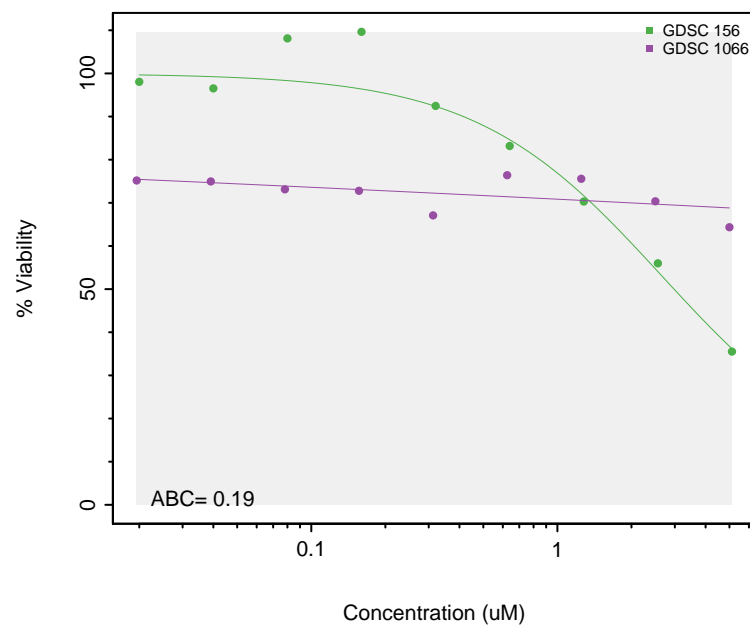

AZD6482:ACHN

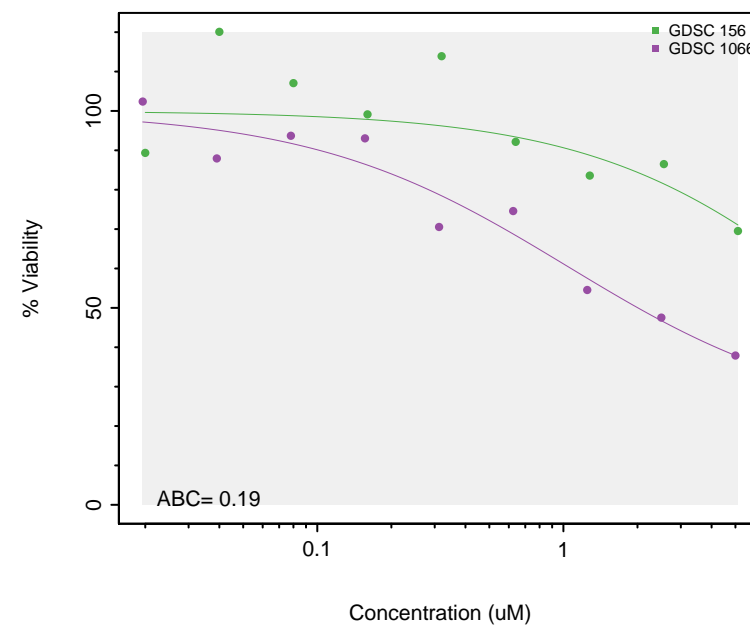

AZD6482:KNS-42

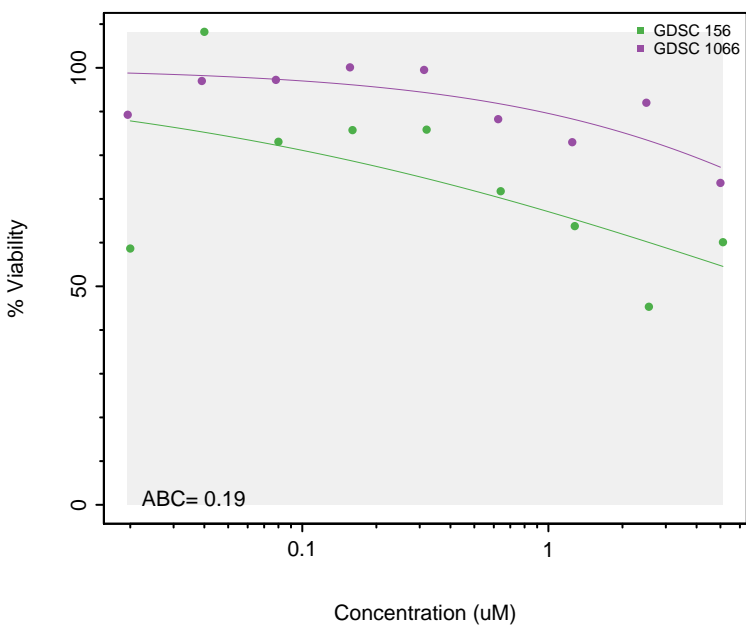

AZD6482:HCC1954

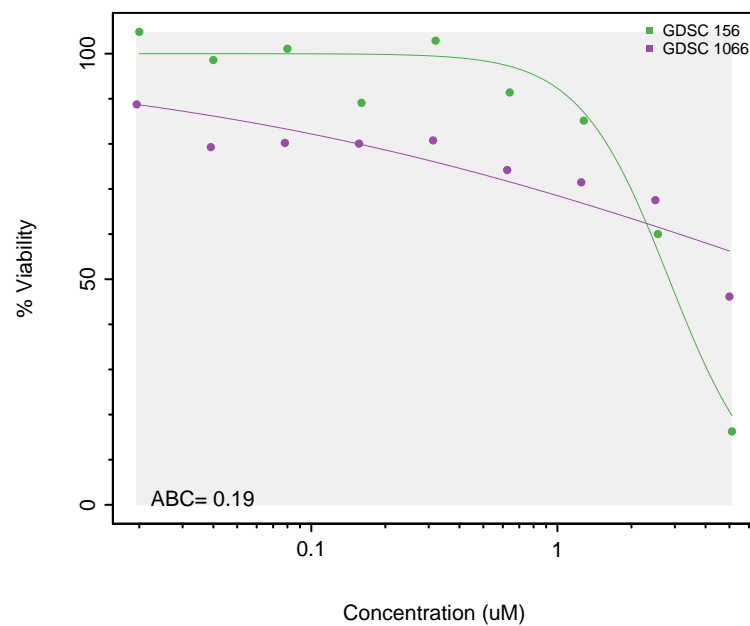

AZD6482:ECC10

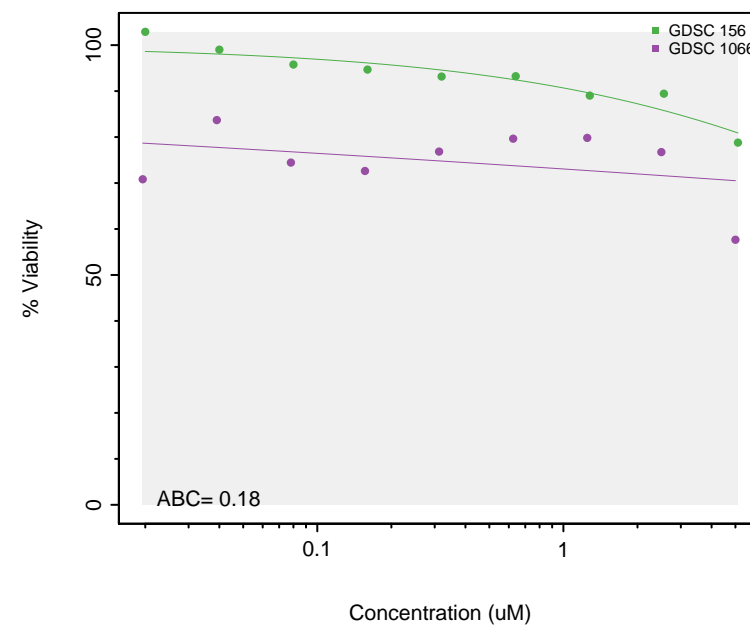

AZD6482:SK-UT-1

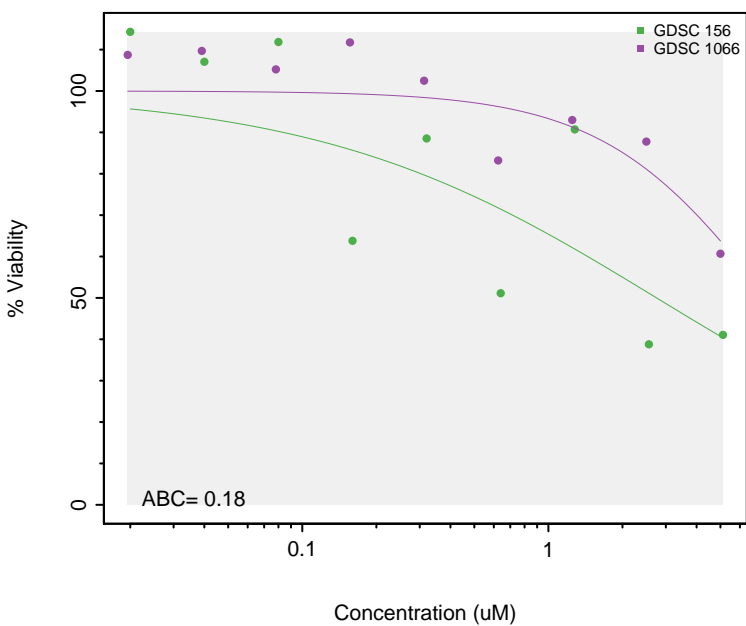

AZD6482:NCI-H1155

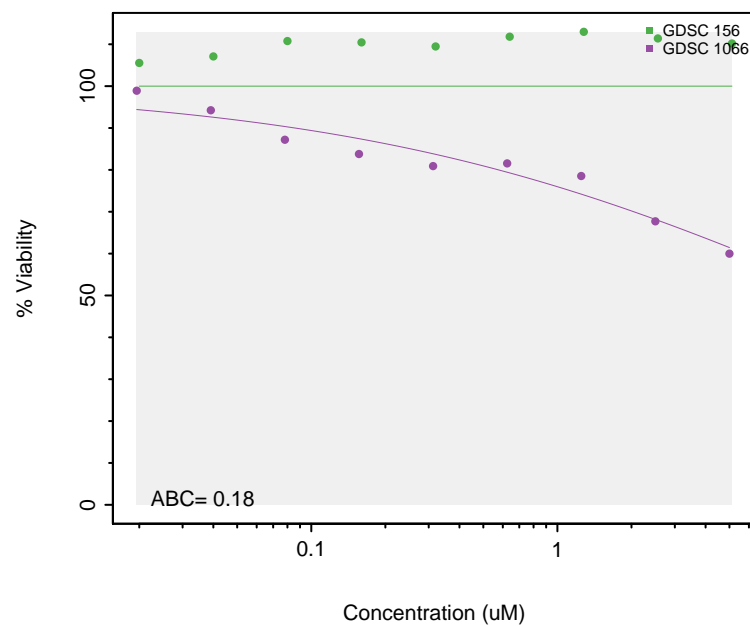

AZD6482:OVCAR-5

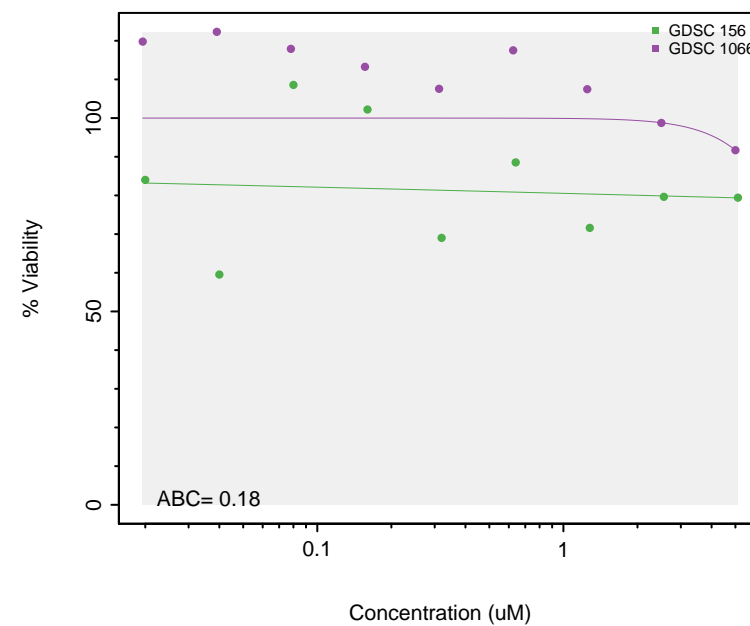

AZD6482:GT3TKB

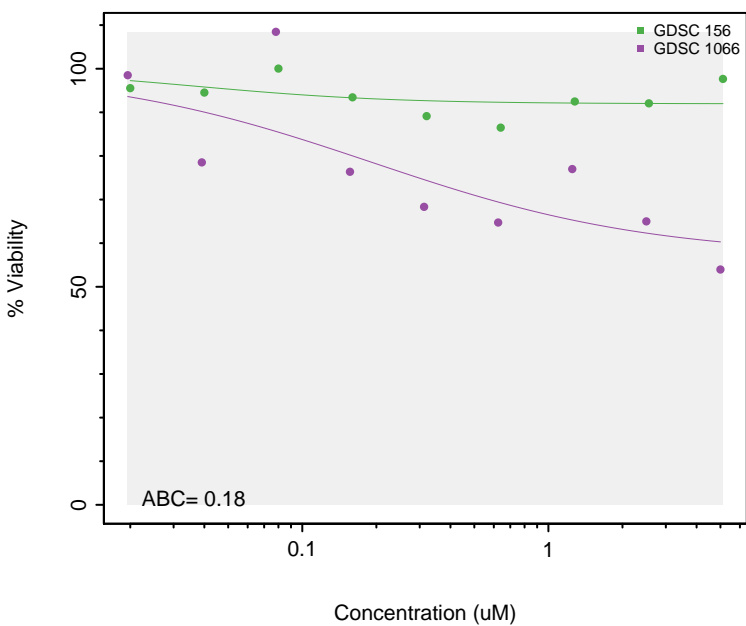

AZD6482:MCF7

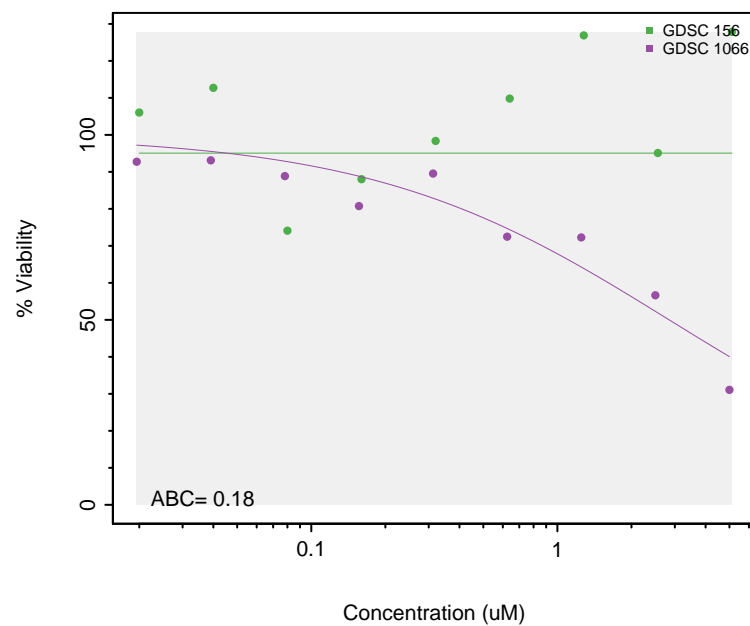

AZD6482:MFM-223

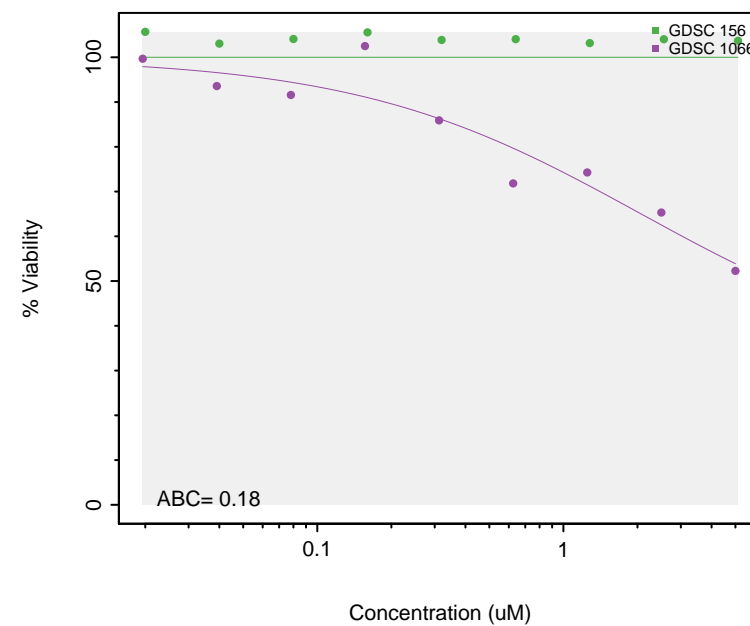

AZD6482:HCC2157

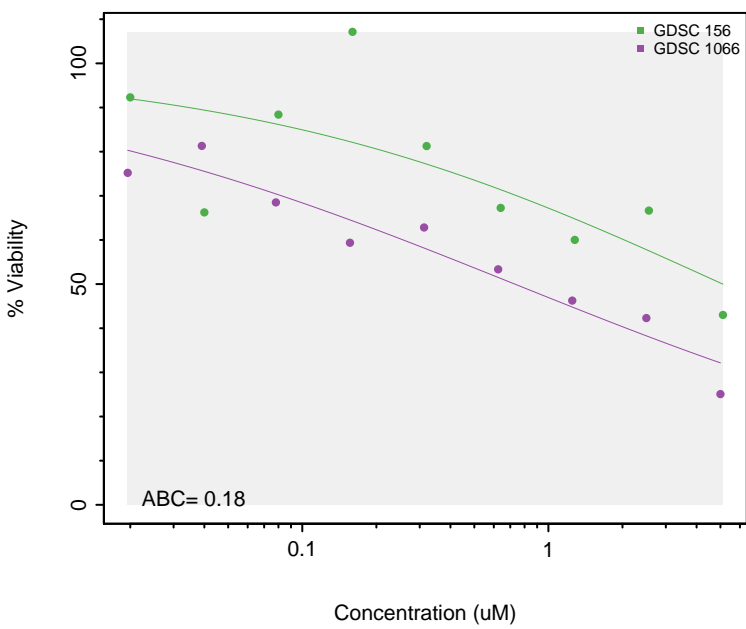

AZD6482:BV-173

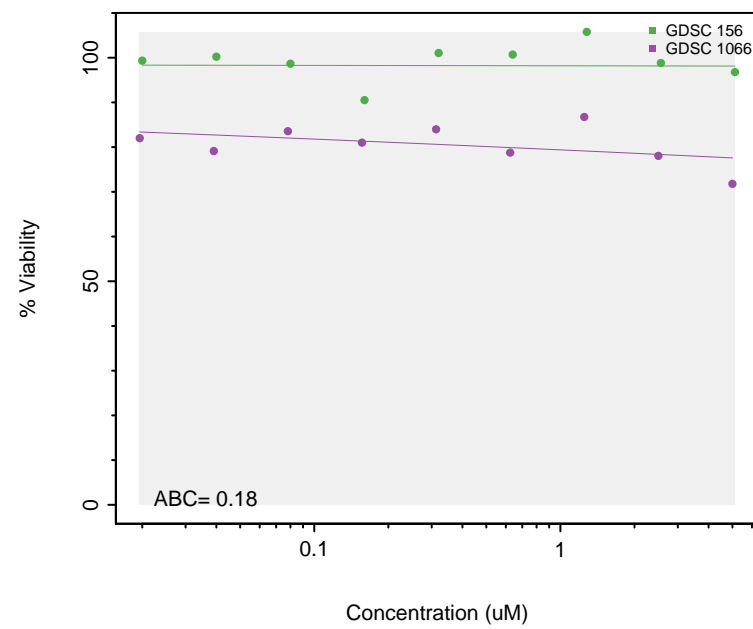

AZD6482:NY

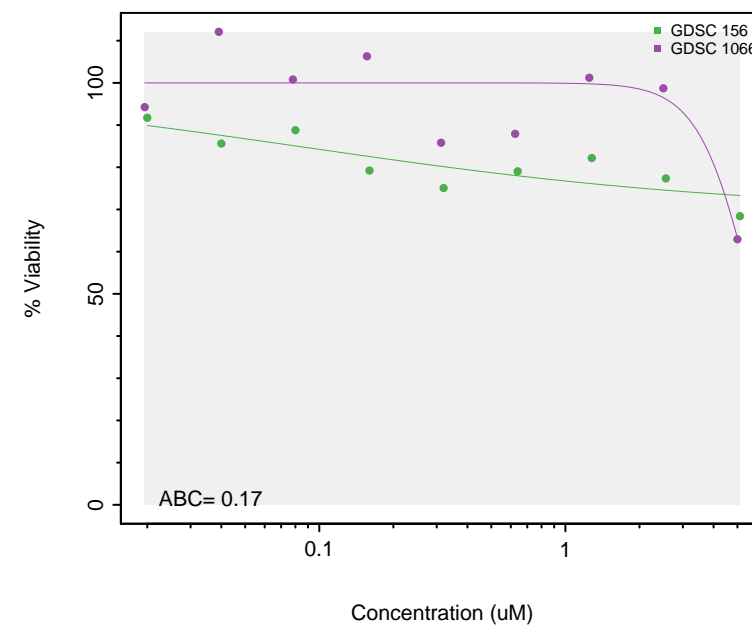

AZD6482:KYSE-270

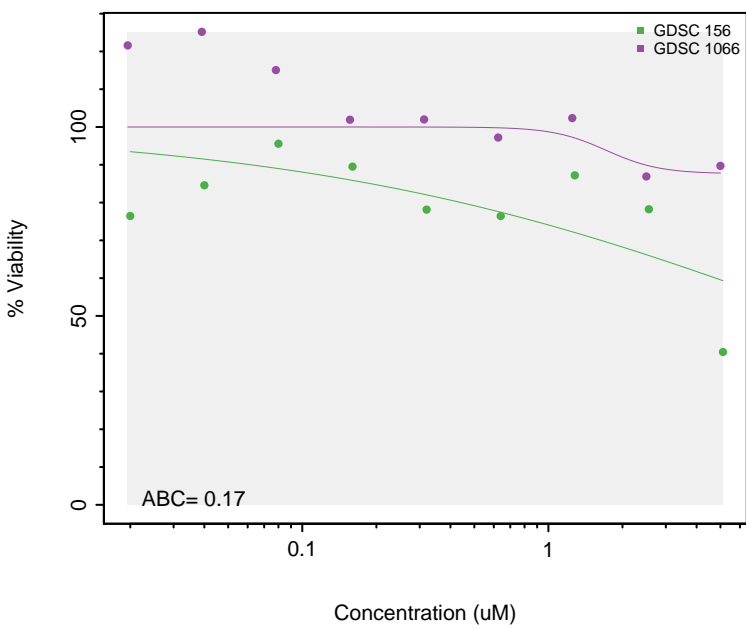

AZD6482:SCC-4

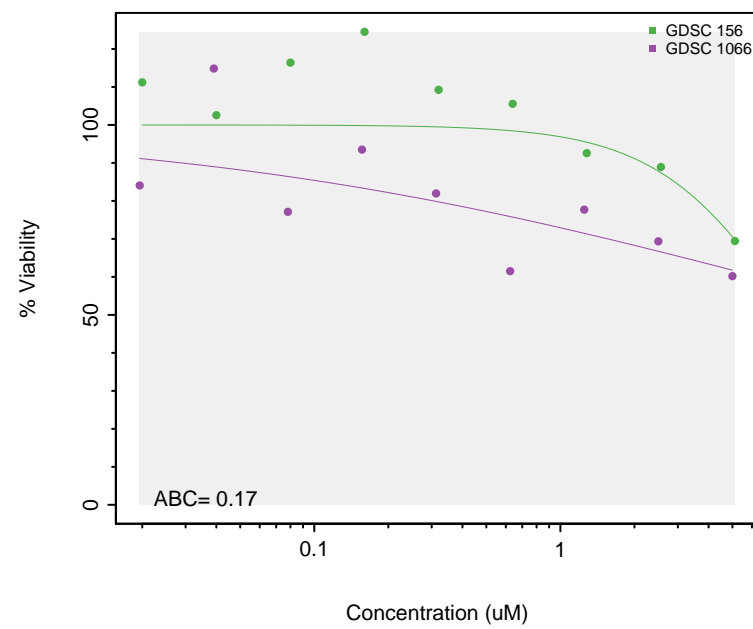

AZD6482:NCI-H292

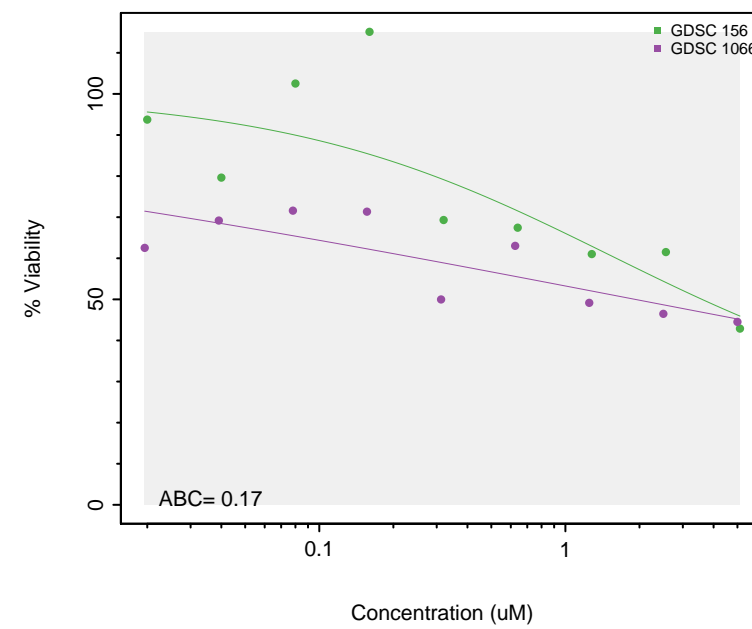

AZD6482:EFM-19

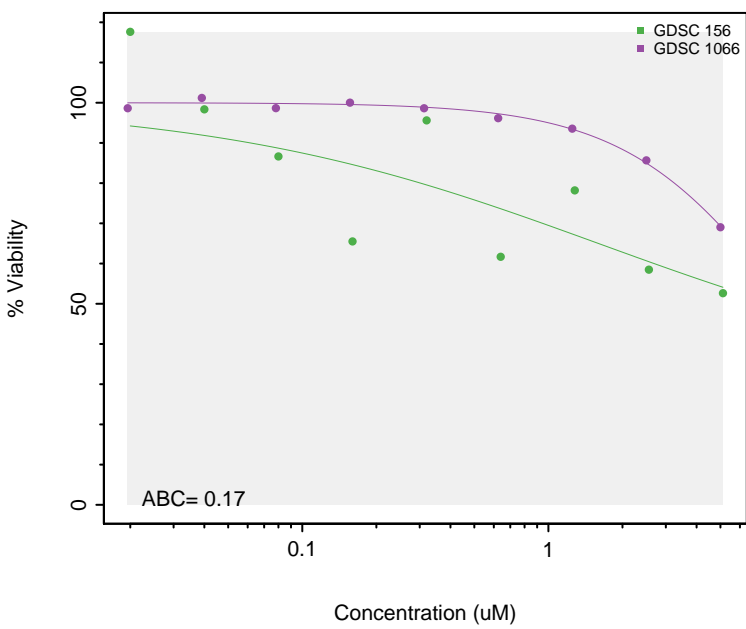

AZD6482:NCI-H522

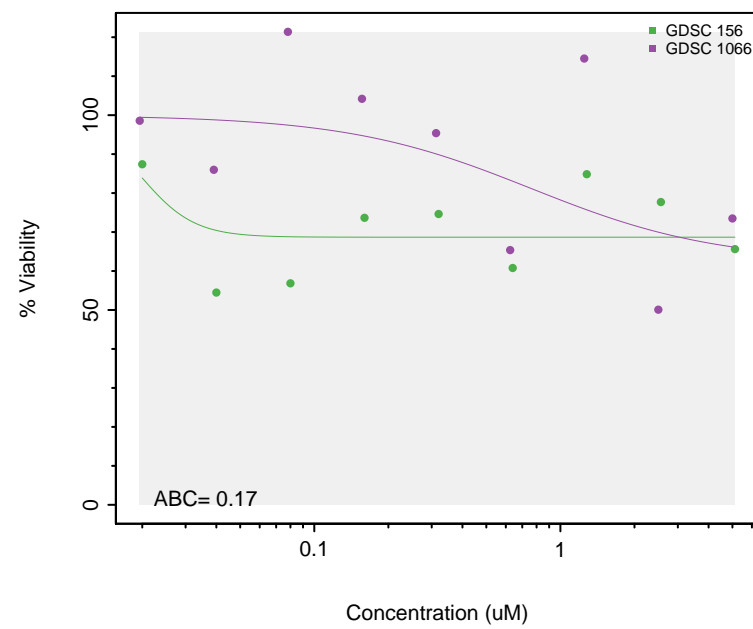

AZD6482:8-MG-BA

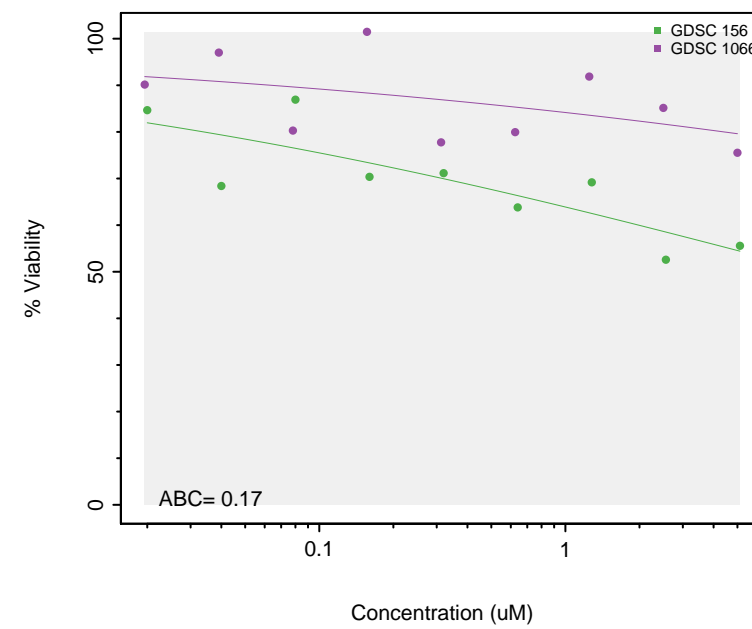

AZD6482:MZ2-MEL

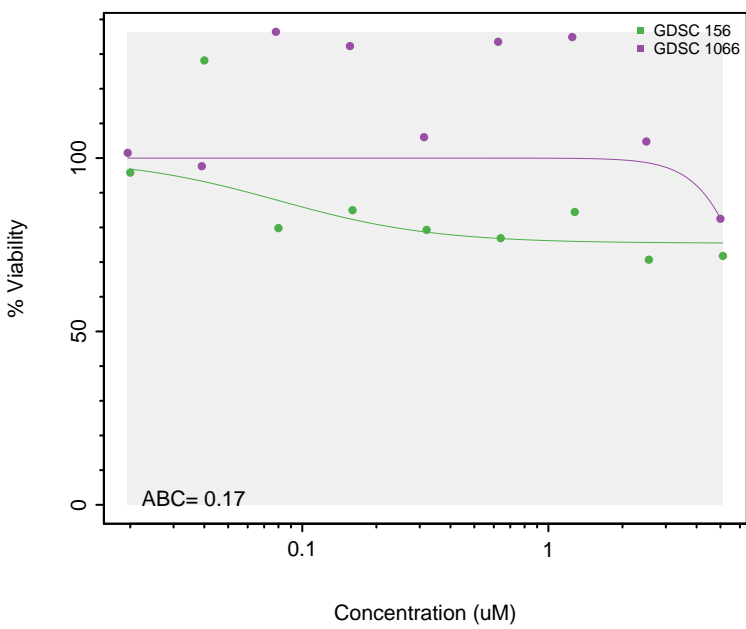

AZD6482:SW954

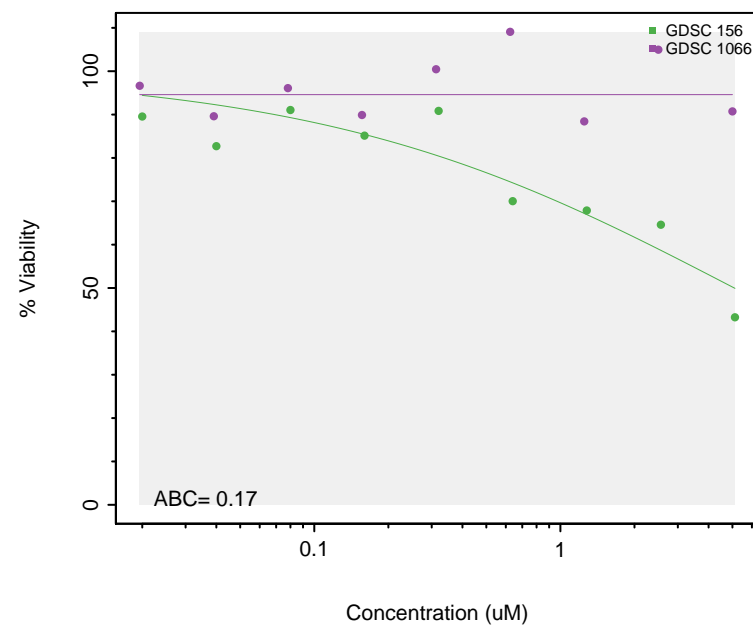

AZD6482:HCC1419

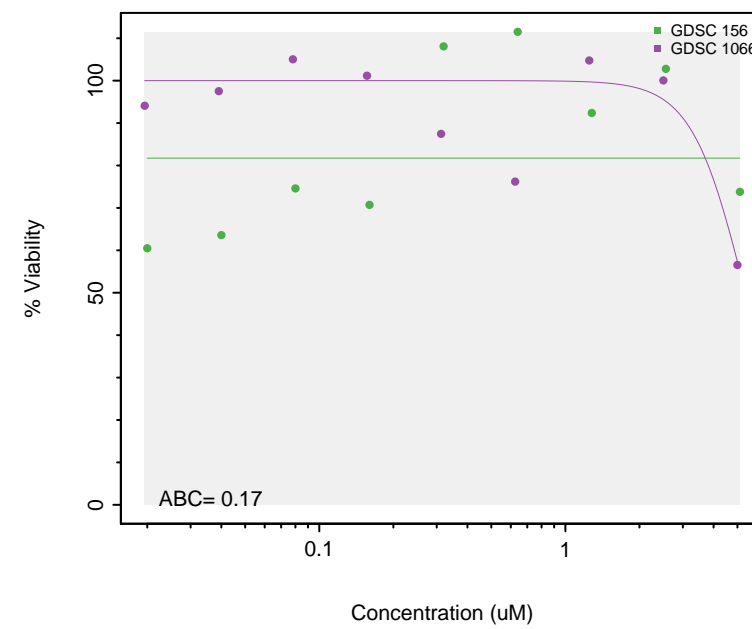

AZD6482:HSC-4

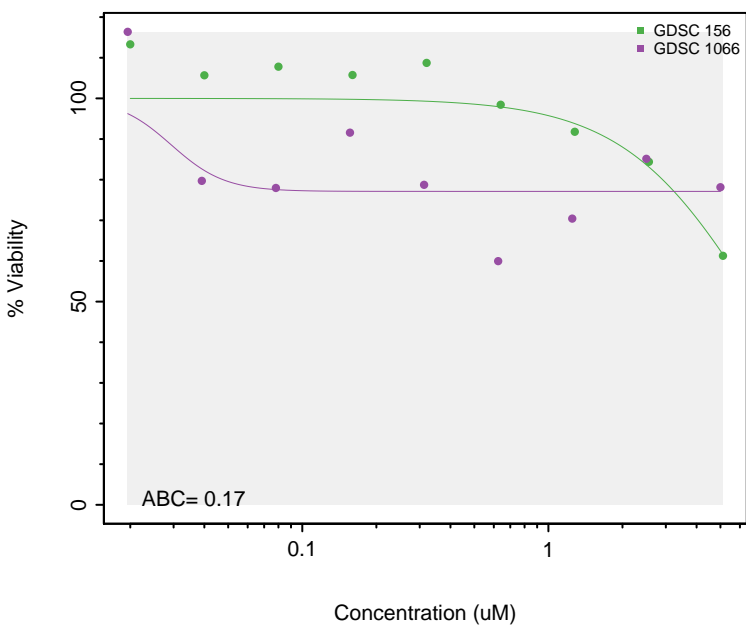

AZD6482:GAK

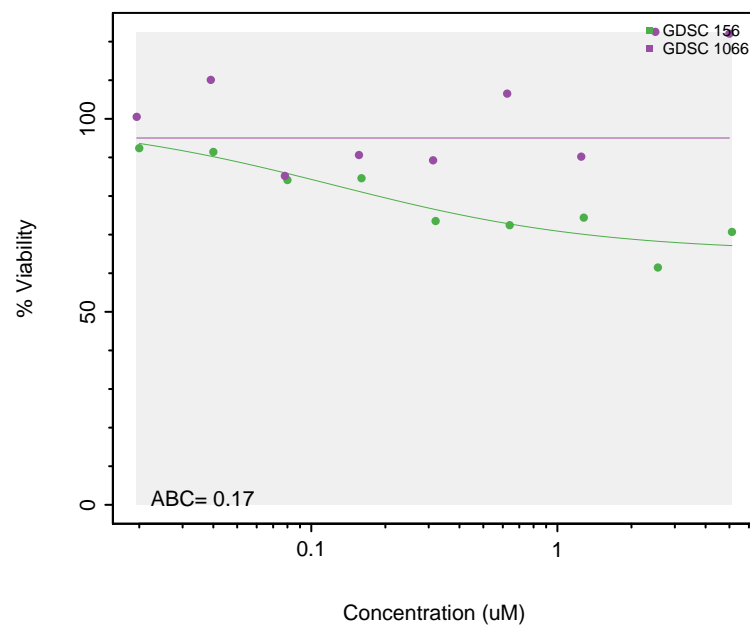

AZD6482:T47D

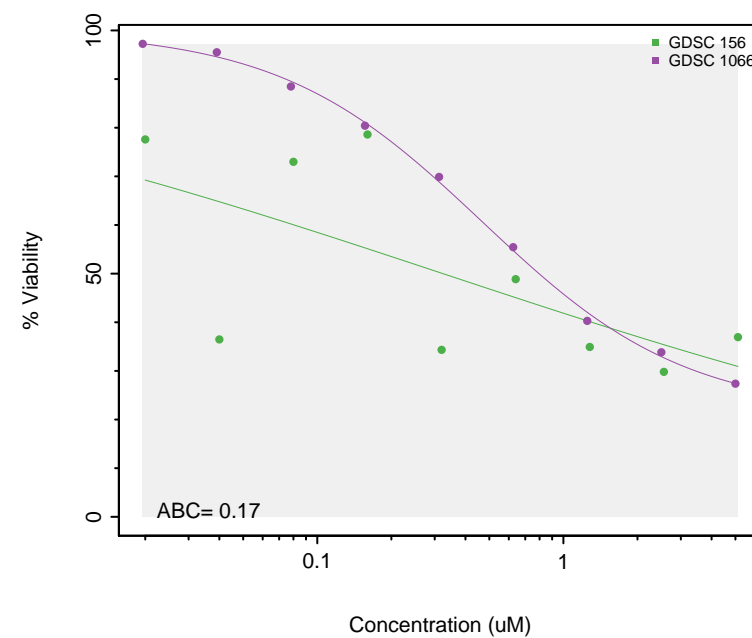

AZD6482:NCI-H82

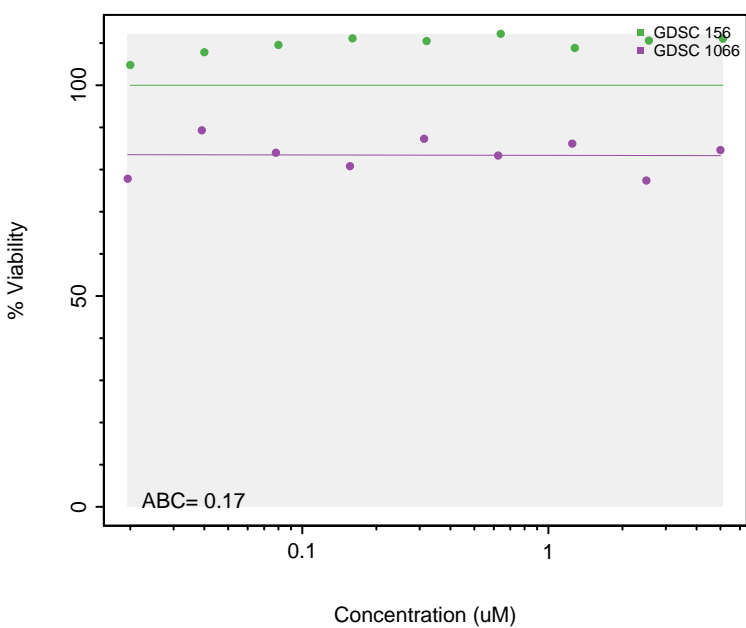

AZD6482:MONO-MAC-6

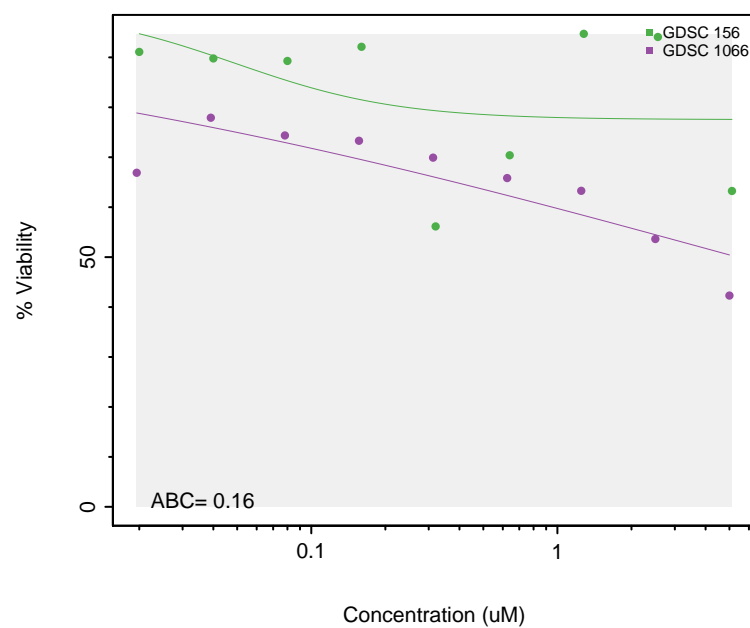

AZD6482:U-118-MG

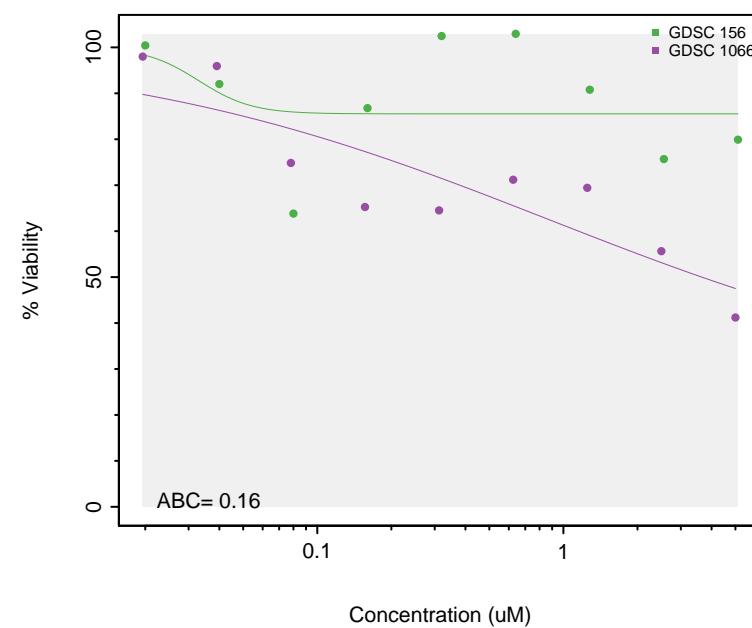

AZD6482:OVCAR-3

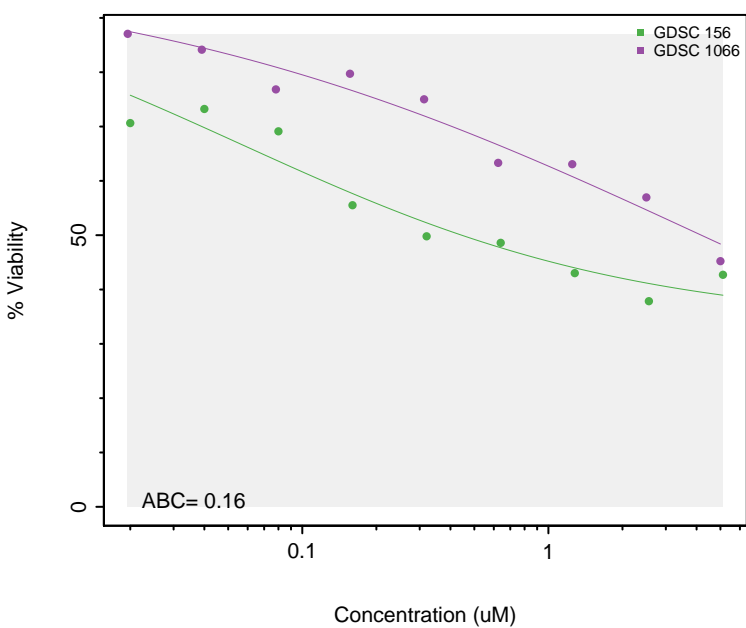

AZD6482:CESS

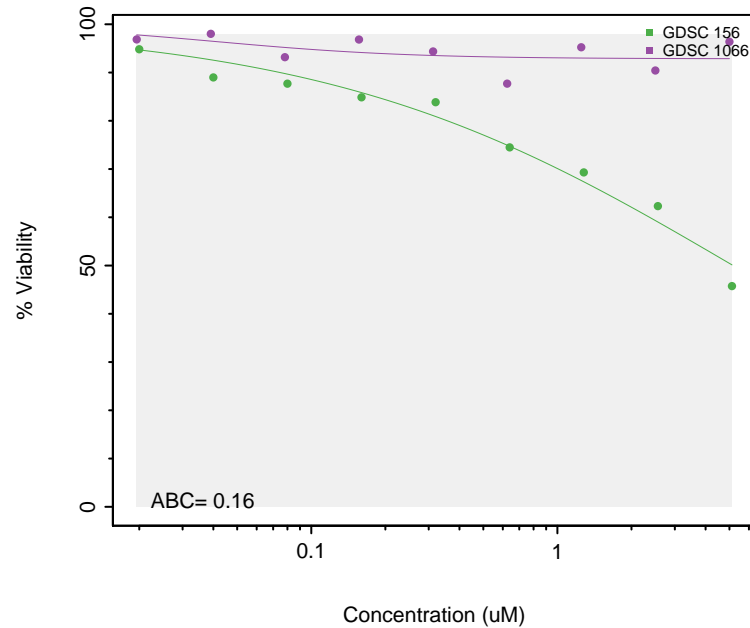

AZD6482:HT-144

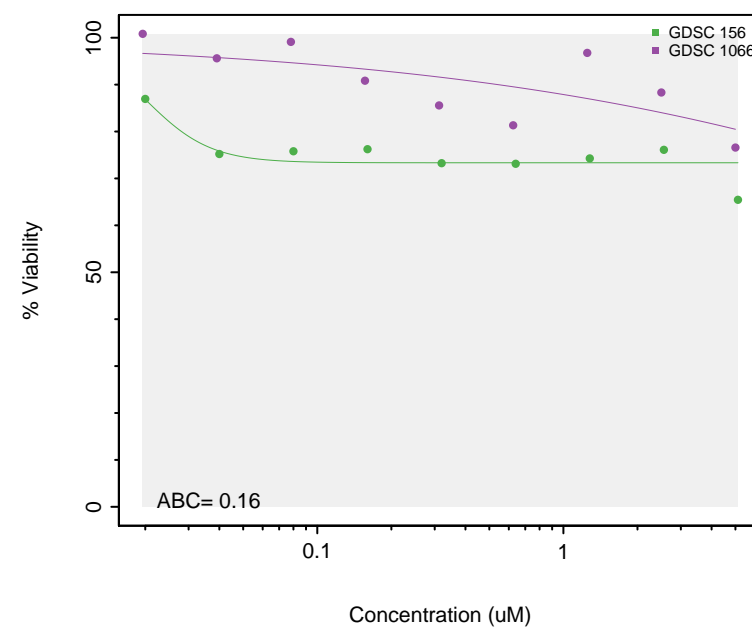

AZD6482:EC-GI-10

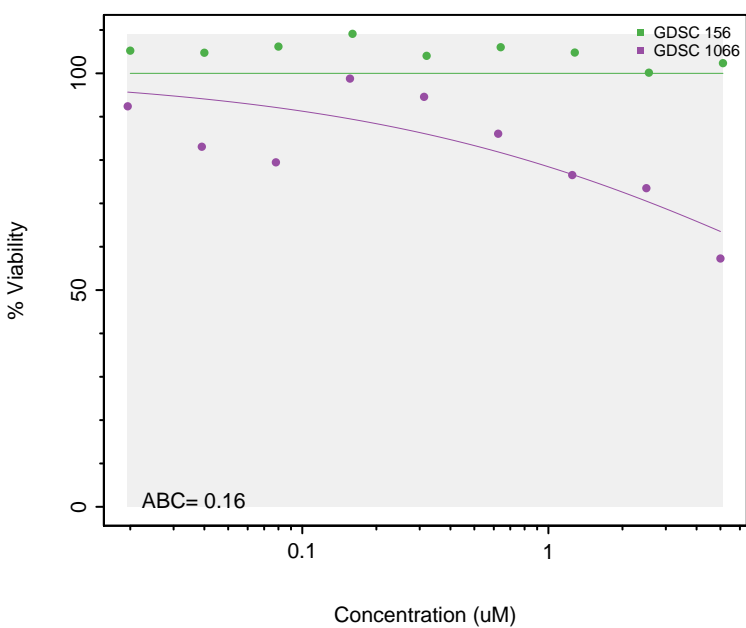

AZD6482:SAS

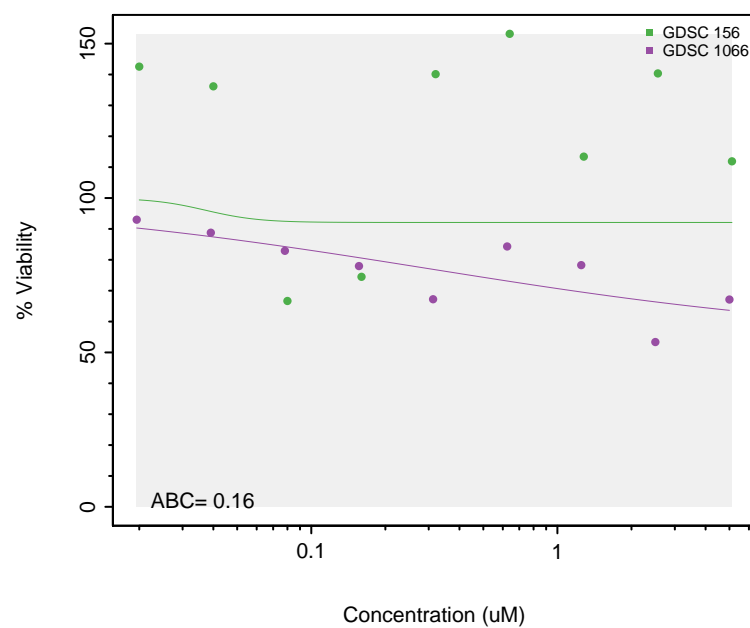

AZD6482:HCC38

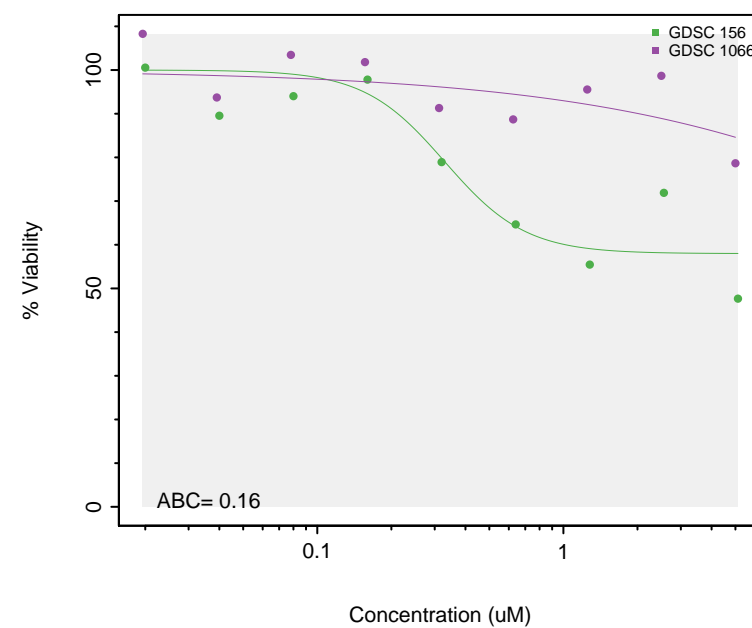

AZD6482:SBC-5

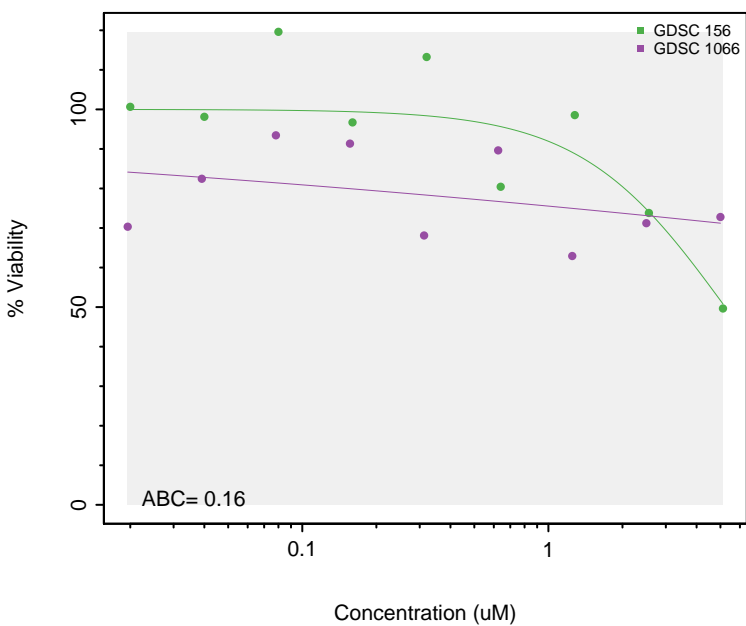

AZD6482:IGR-1

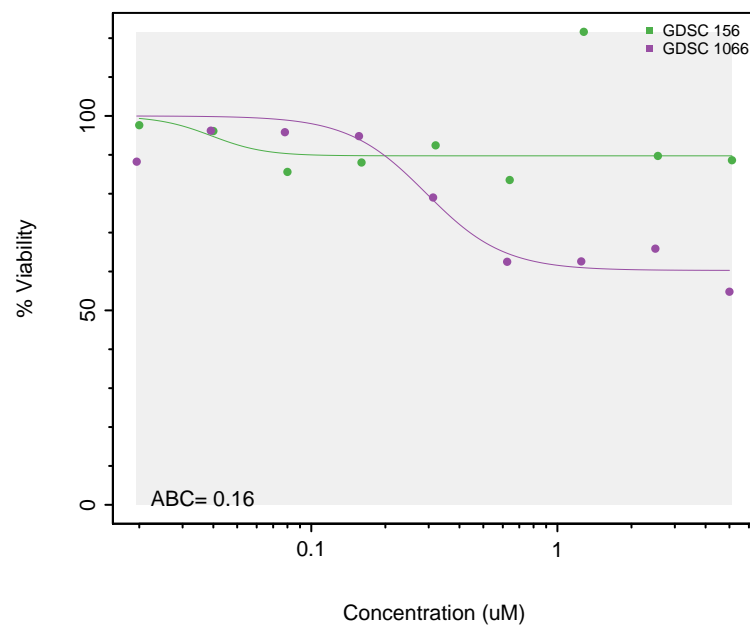

AZD6482:TGBC24TKB

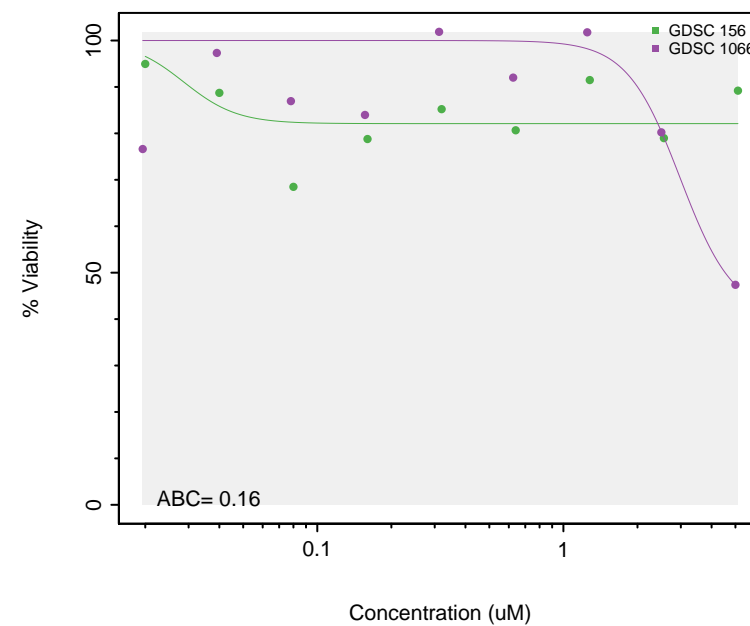

AZD6482:ML-2

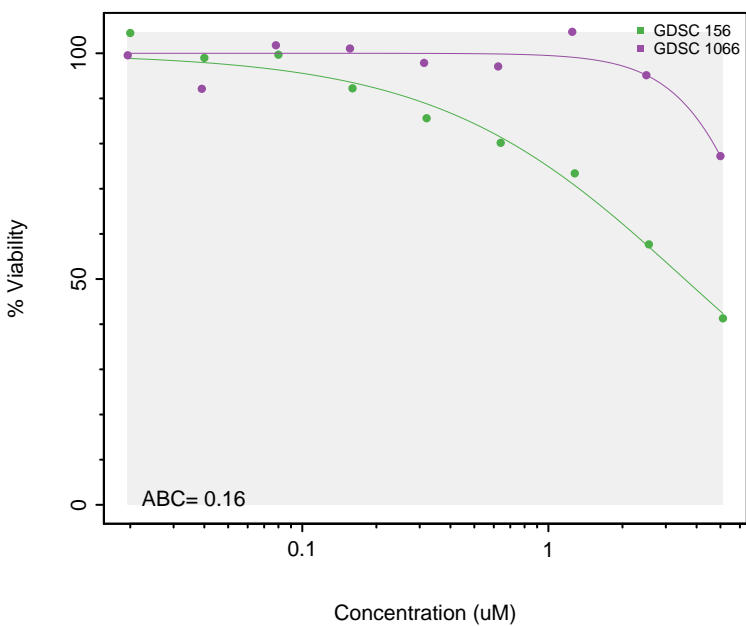

AZD6482:NKM-1

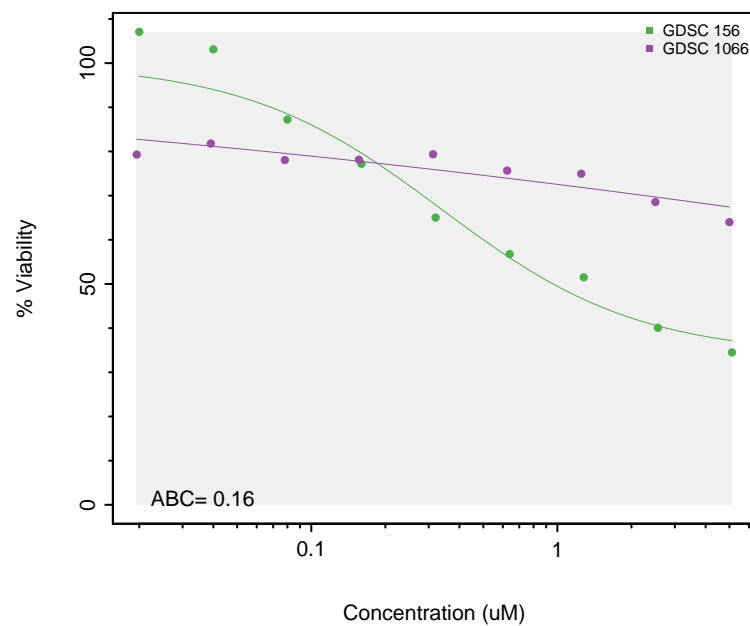

AZD6482:SK-LMS-1

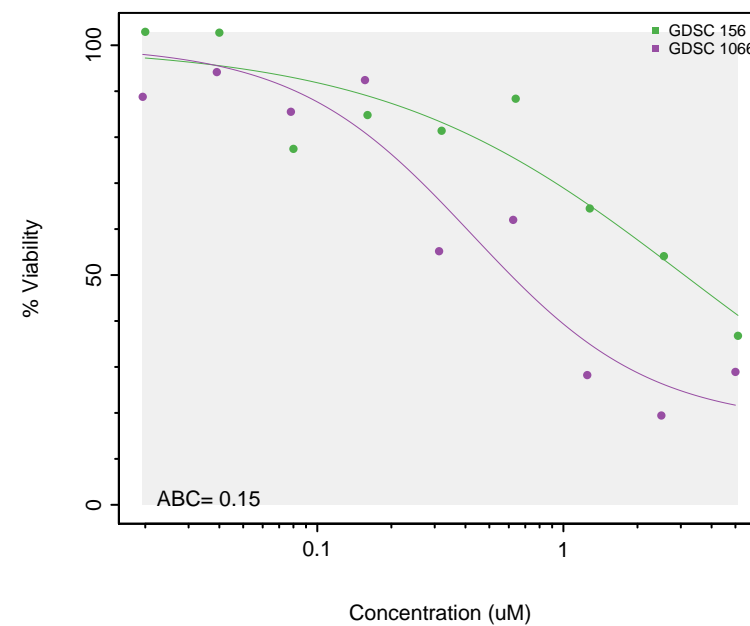

AZD6482:HAL-01

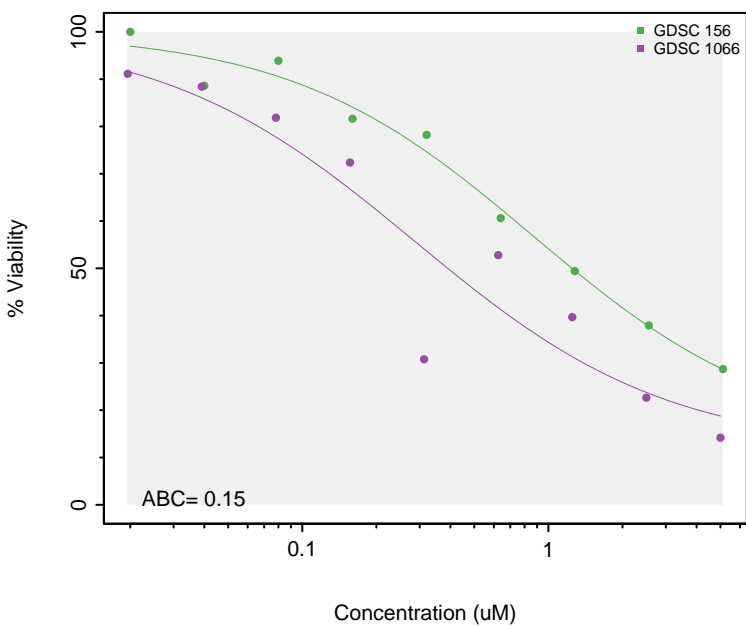

AZD6482:ATN-1

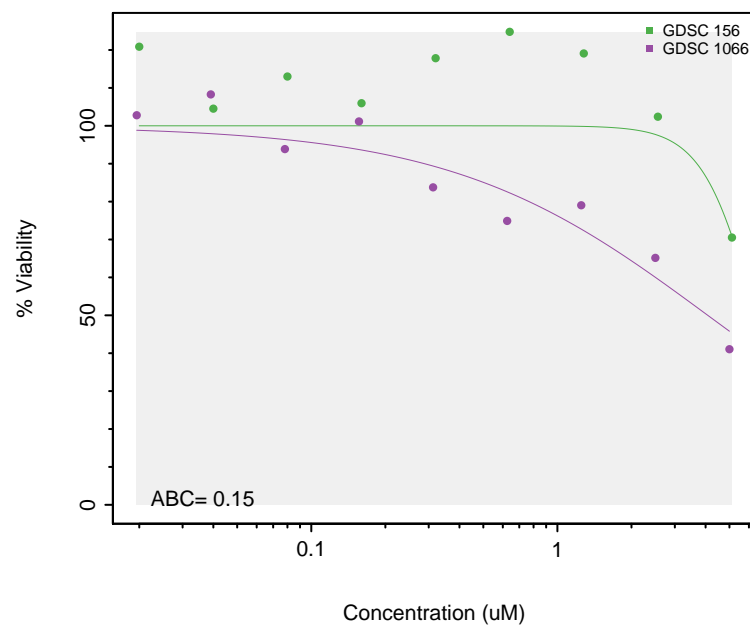

AZD6482:BT-20

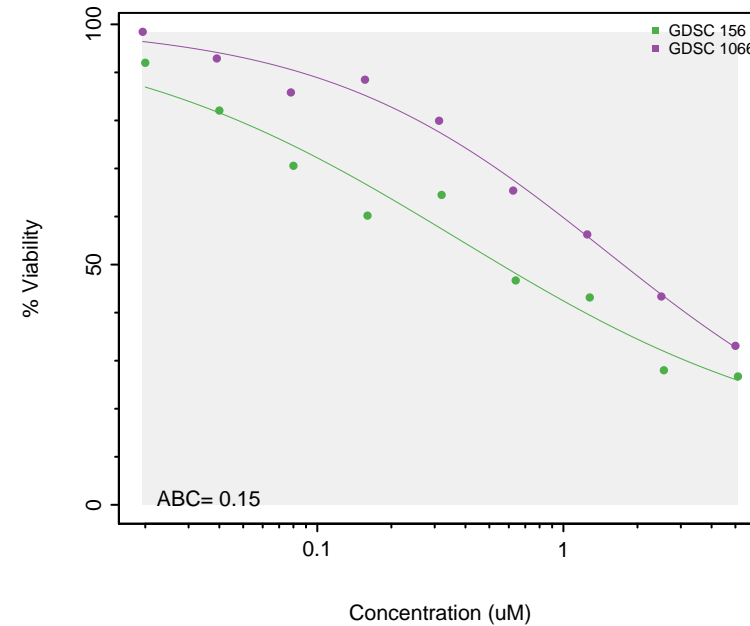

AZD6482:C32

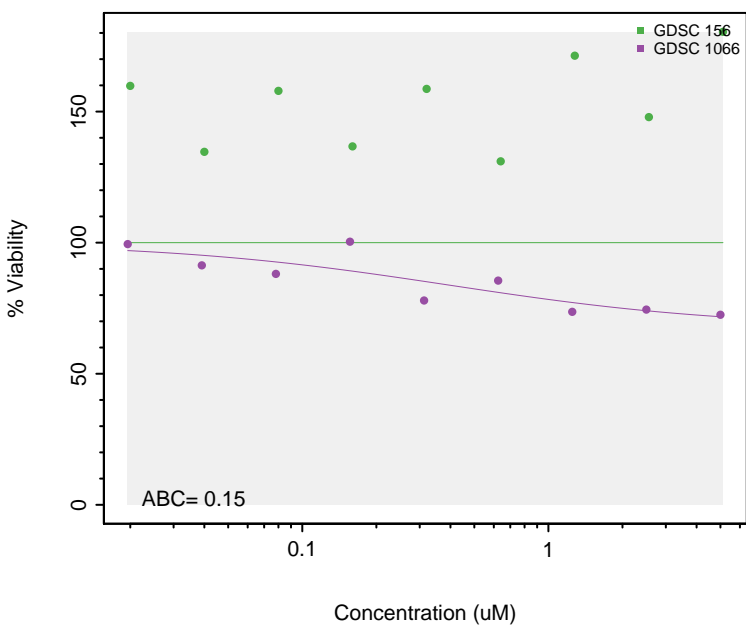

AZD6482:NCI-H630

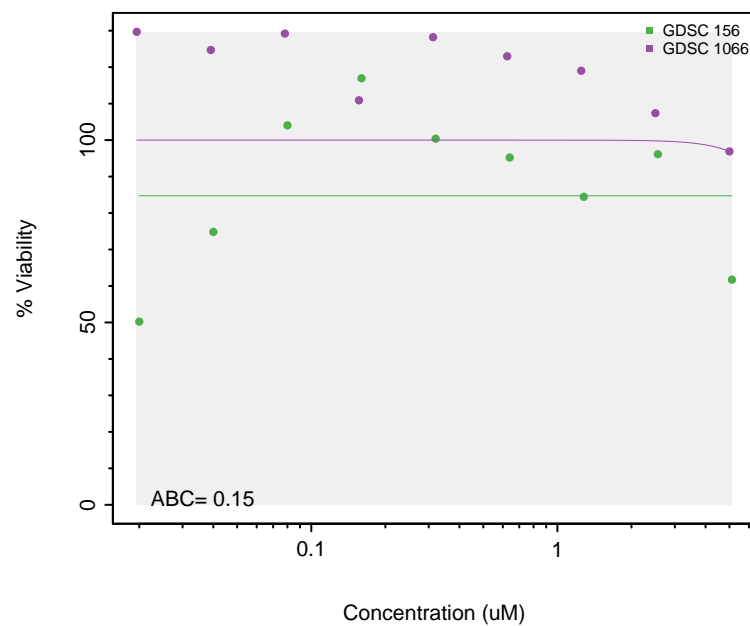

AZD6482:U-2-OS

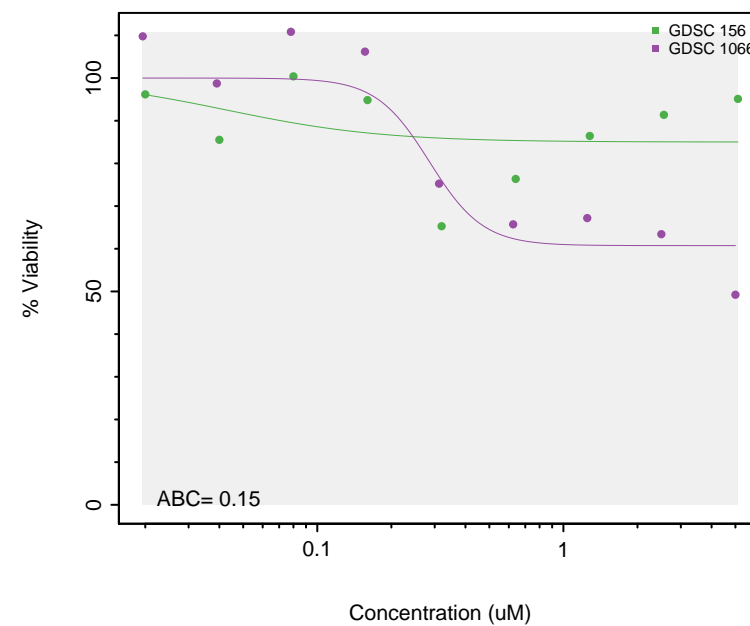

AZD6482:VA-ES-BJ

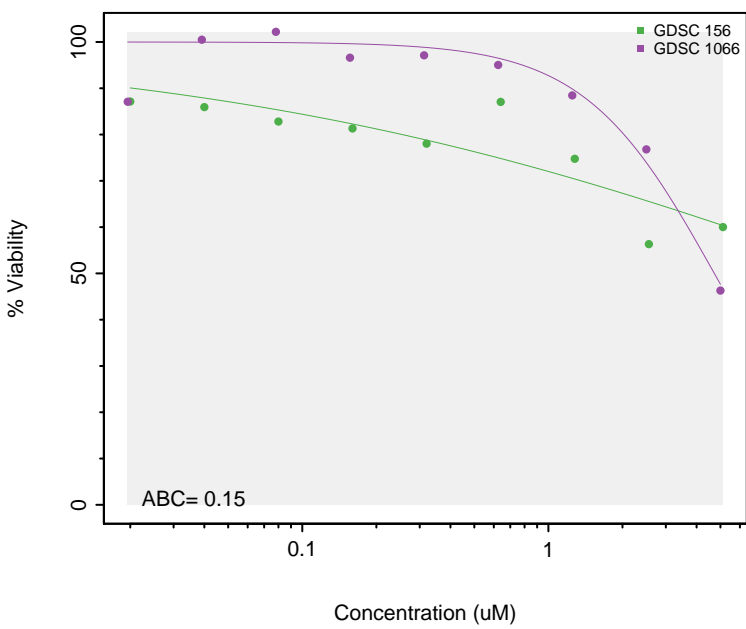

AZD6482:ONS-76

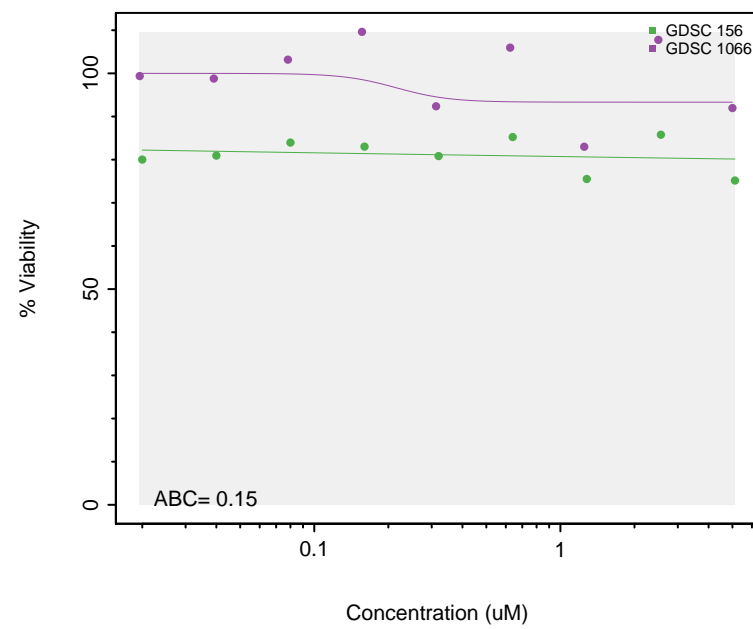

AZD6482:NCI-H2347

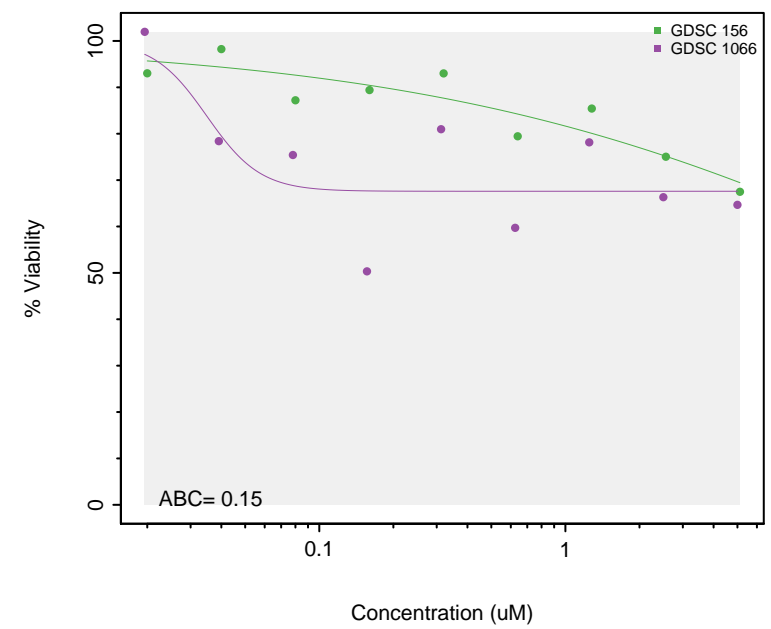

AZD6482:C3A

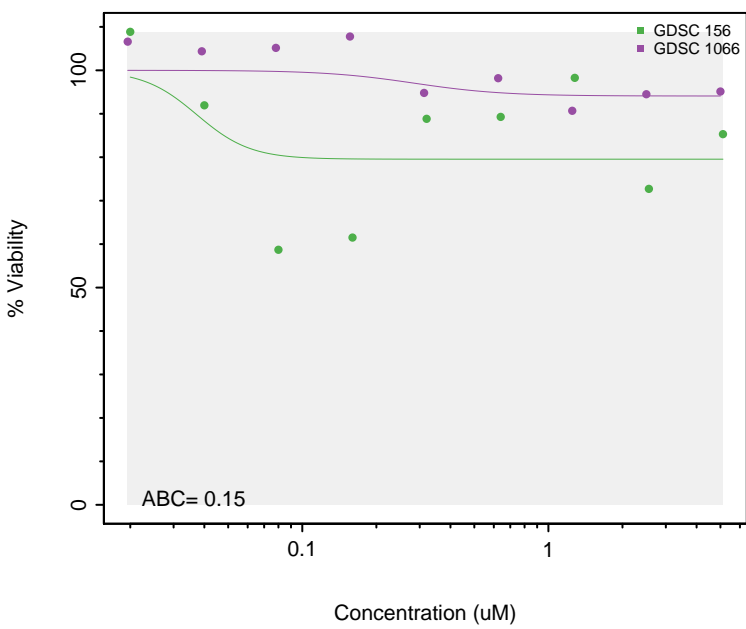

AZD6482:A204

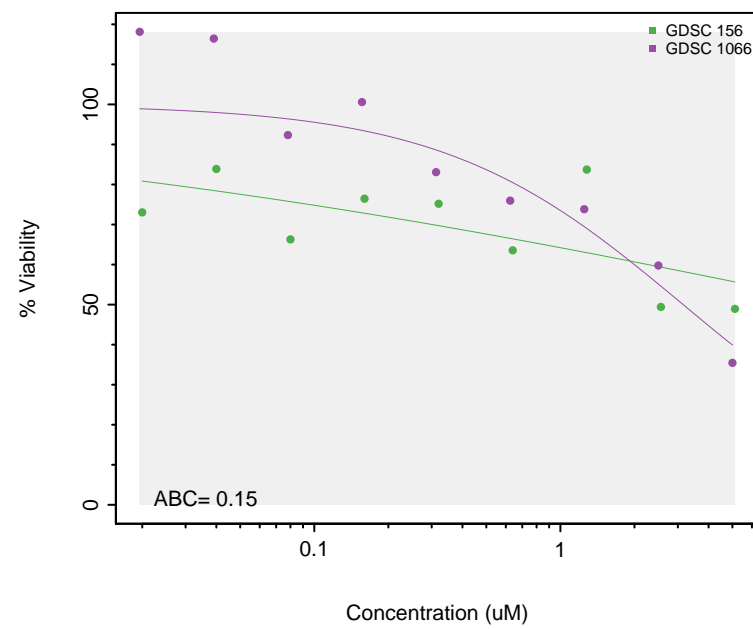

AZD6482:786-0

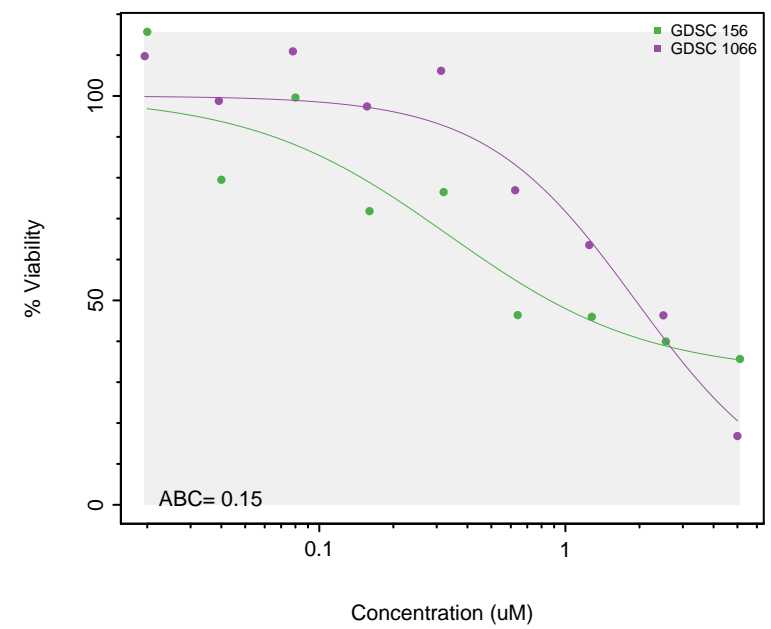

AZD6482:SNU-449

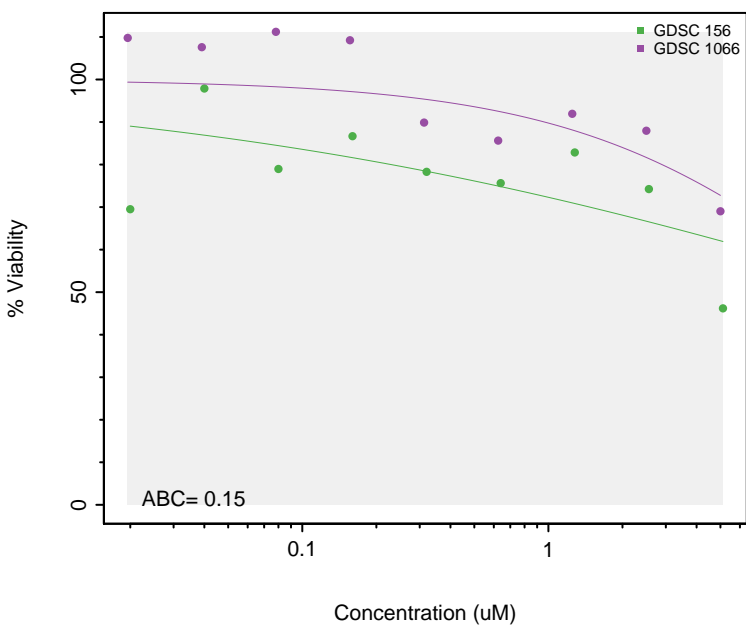

AZD6482:RKO

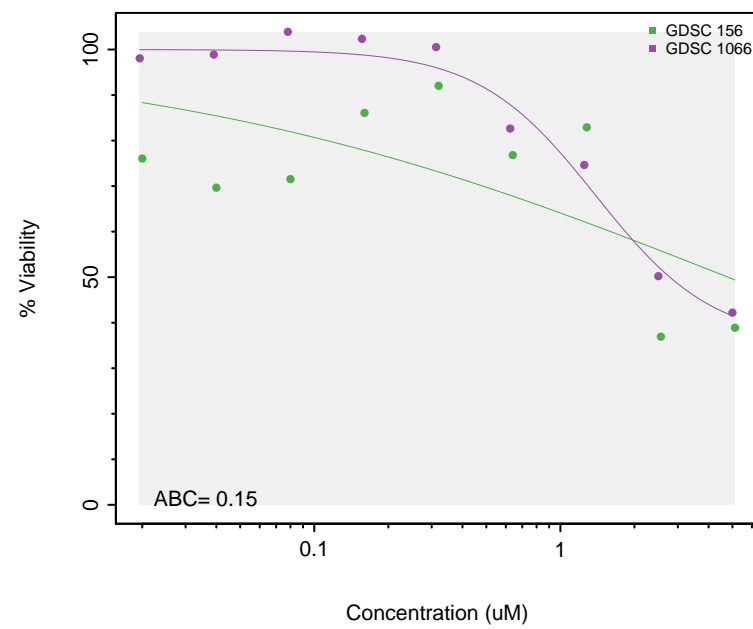

AZD6482:CA46

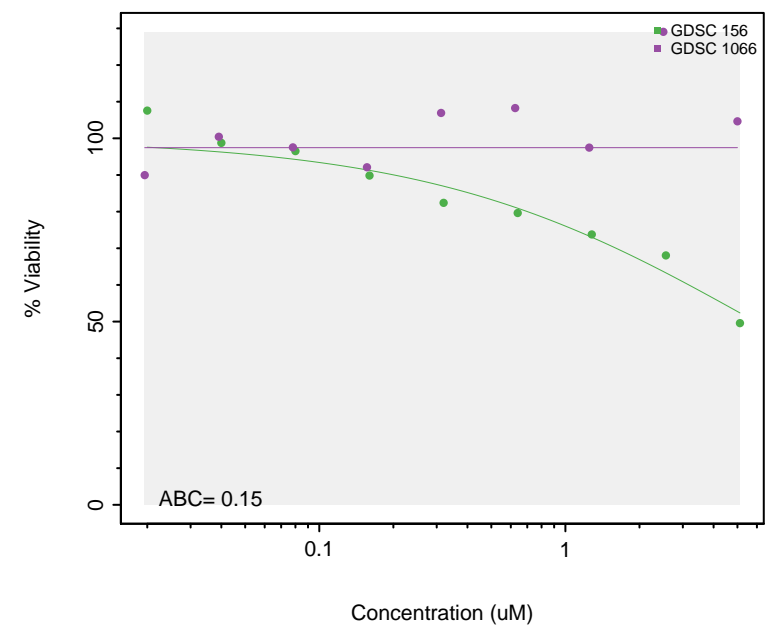

AZD6482:DSH1

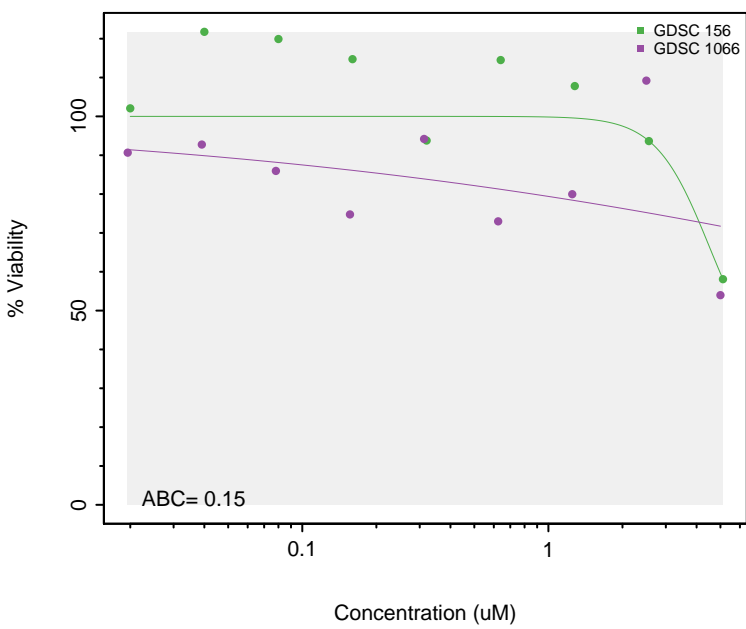

AZD6482:MDA-MB-157

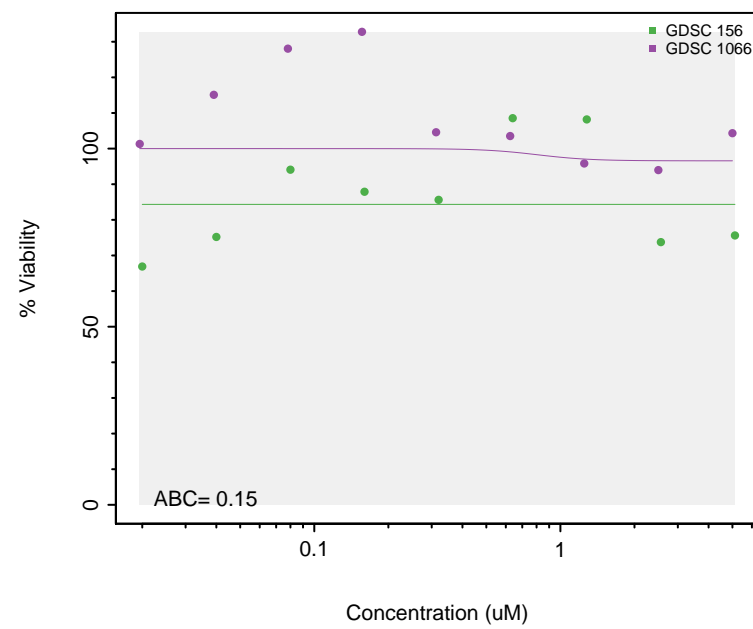

AZD6482:CAL-39

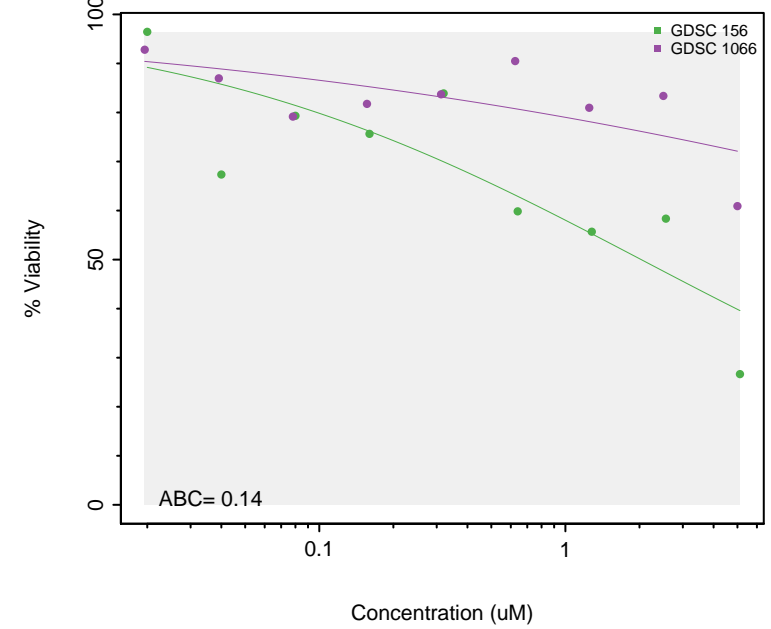

AZD6482:KALS-1

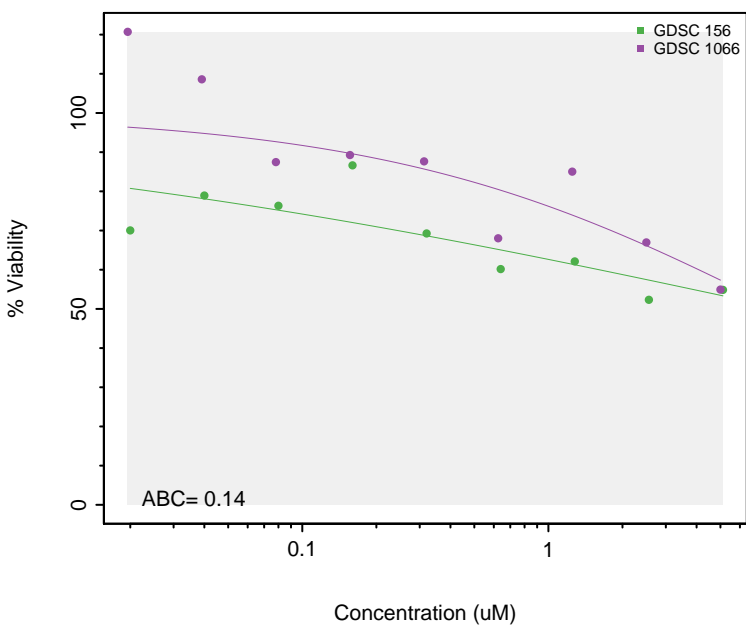

AZD6482:EW-13

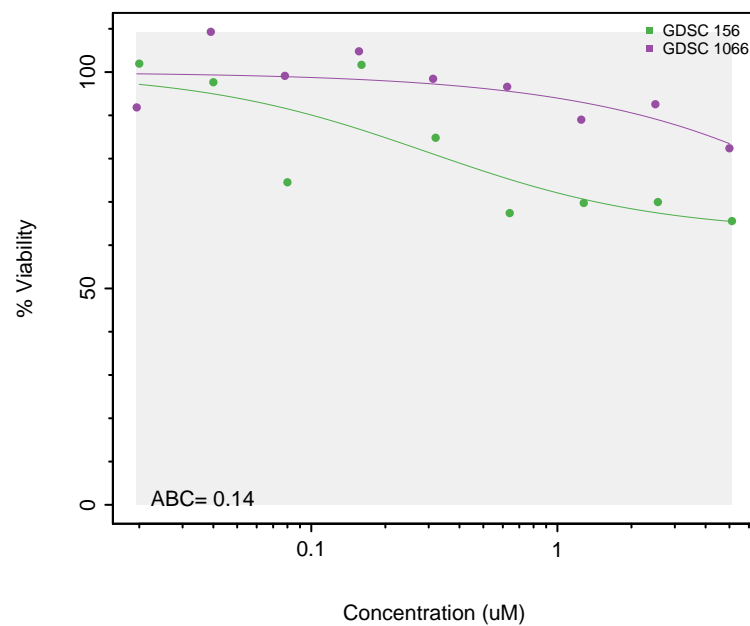

AZD6482:HOS

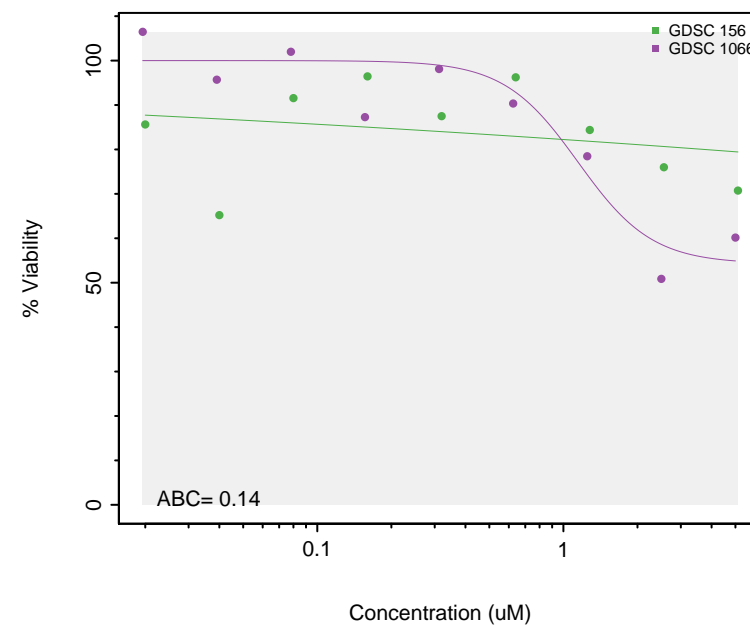

AZD6482:ACN

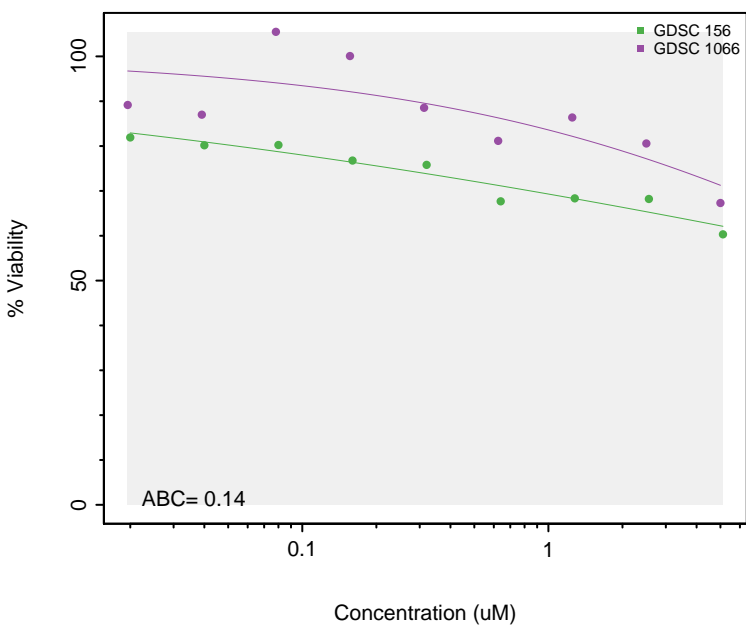

AZD6482:Mewo

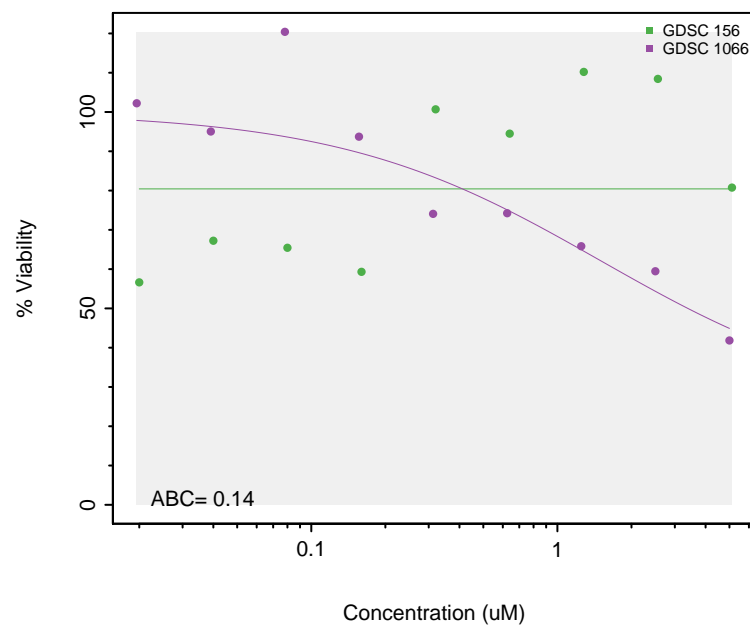

AZD6482:KP-4

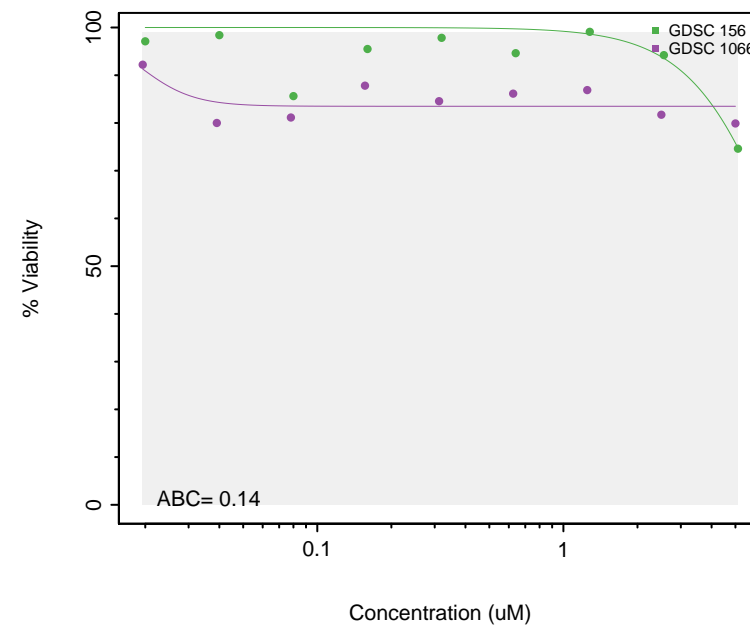

AZD6482:8305C

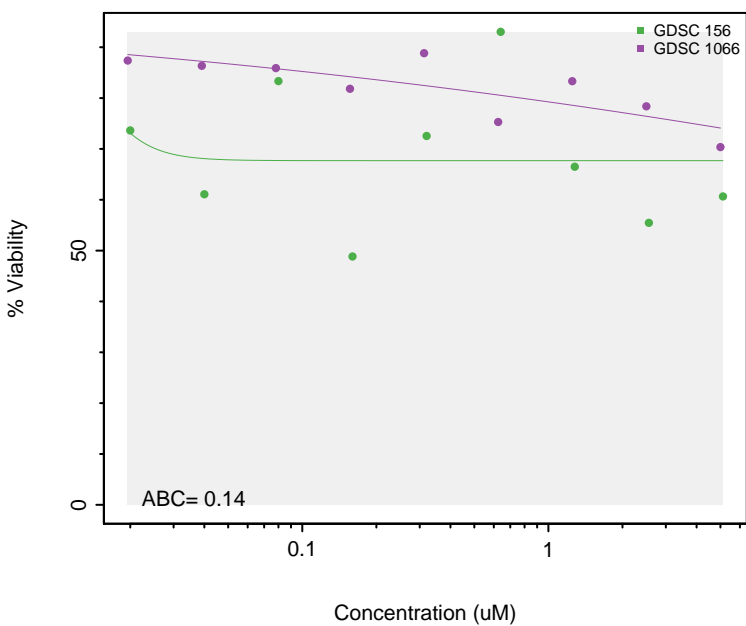

AZD6482:TE-12

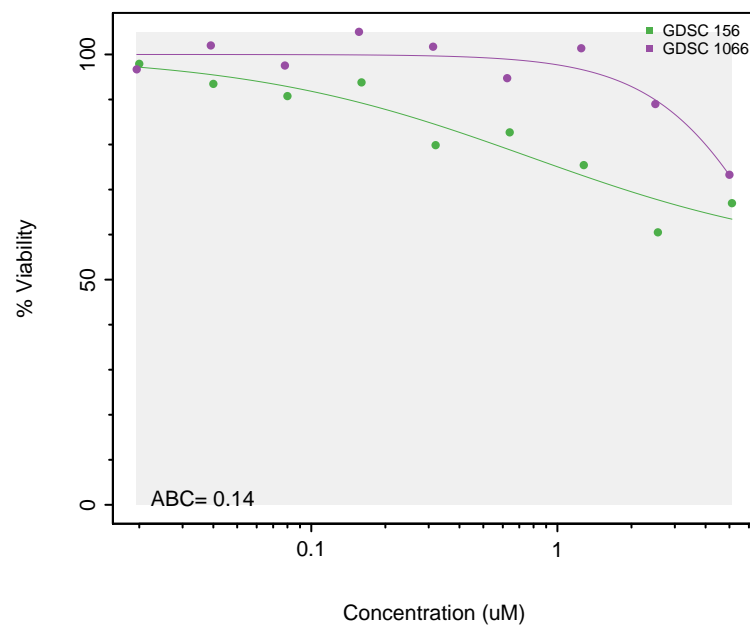

AZD6482:DMS-53

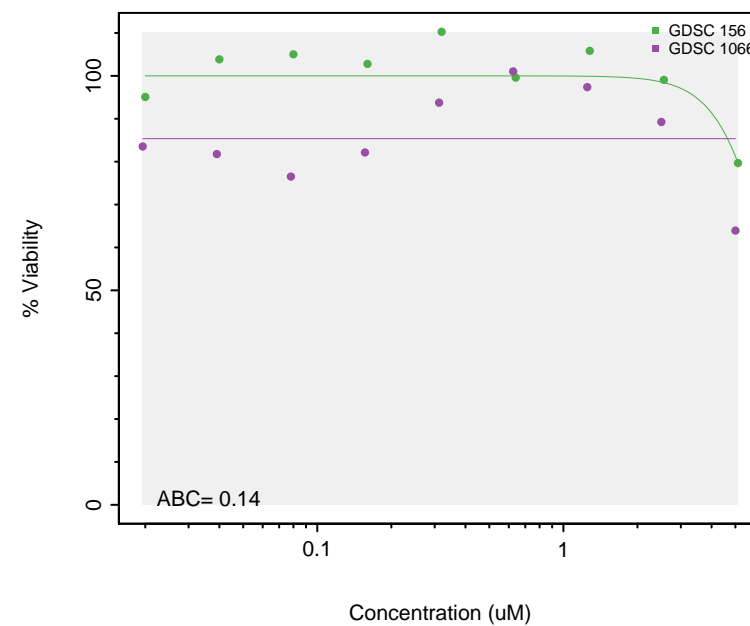

AZD6482:COLO-205

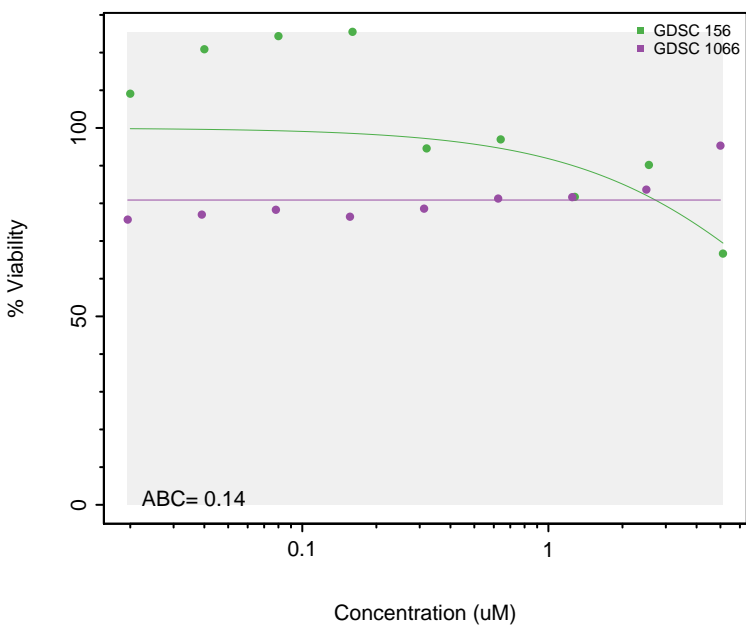

AZD6482:CAS-1

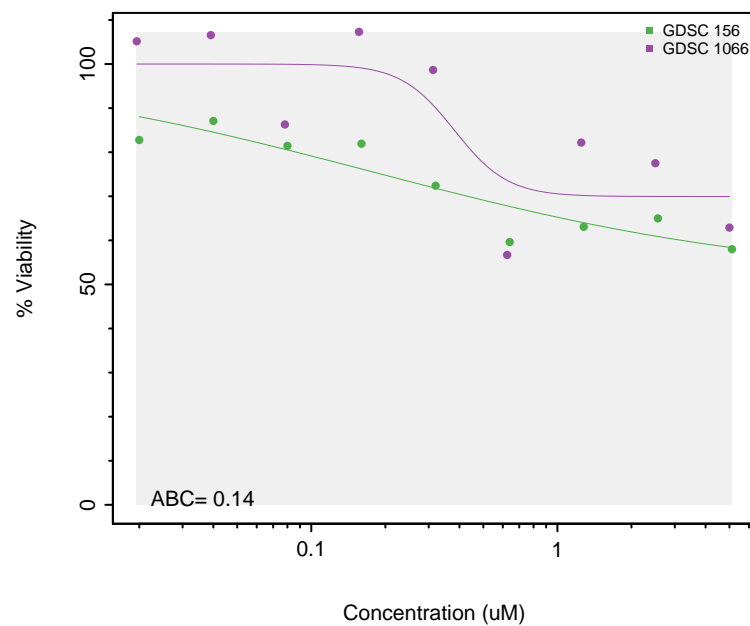

AZD6482:NUGC-3

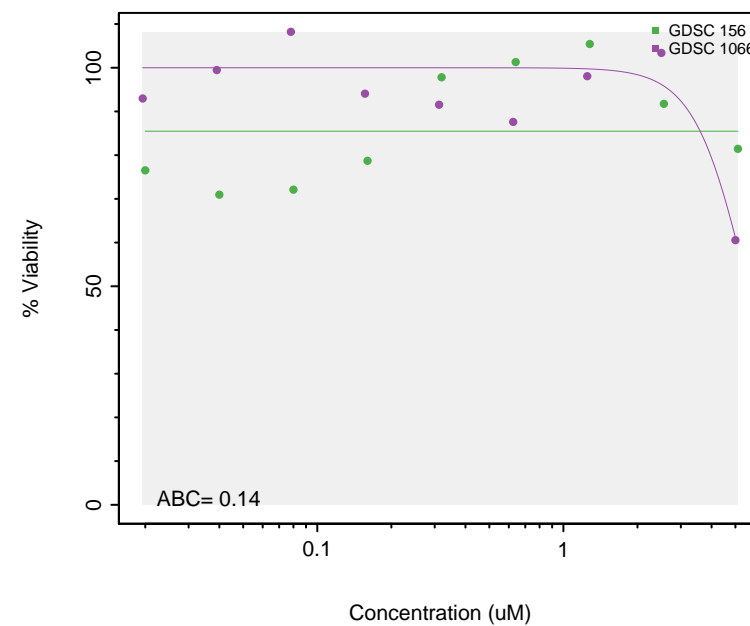

AZD6482:769-P

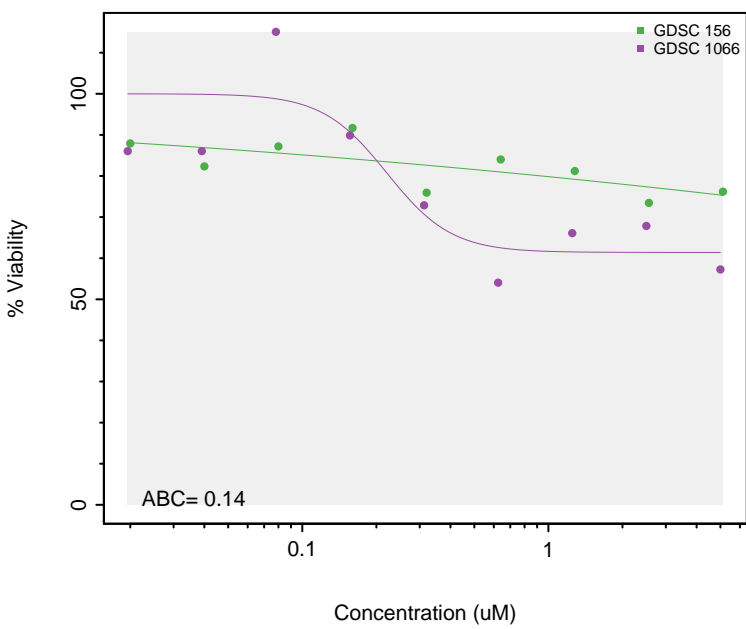

AZD6482:MDA-MB-468

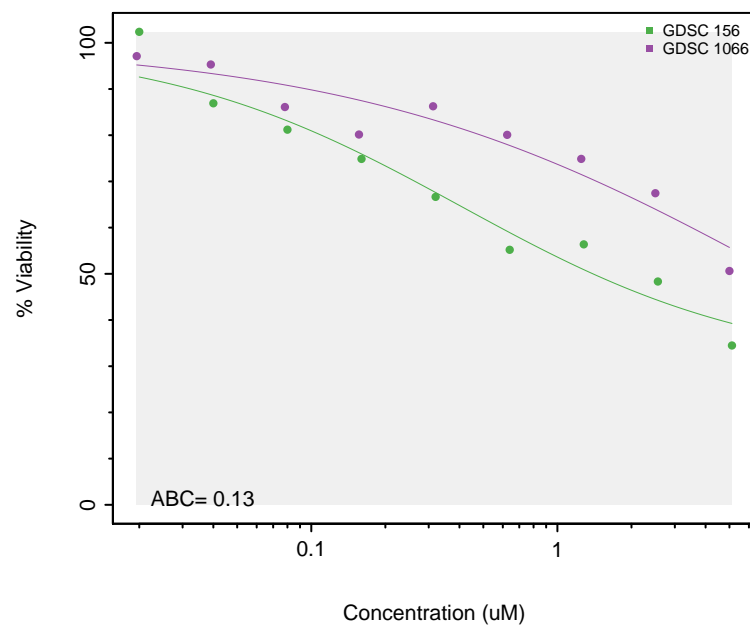

AZD6482:PA-1

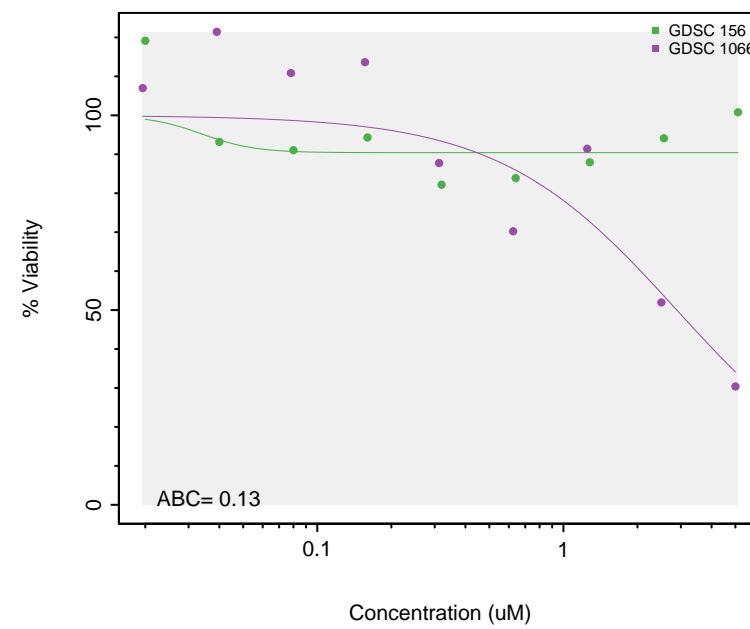

AZD6482:TE-15

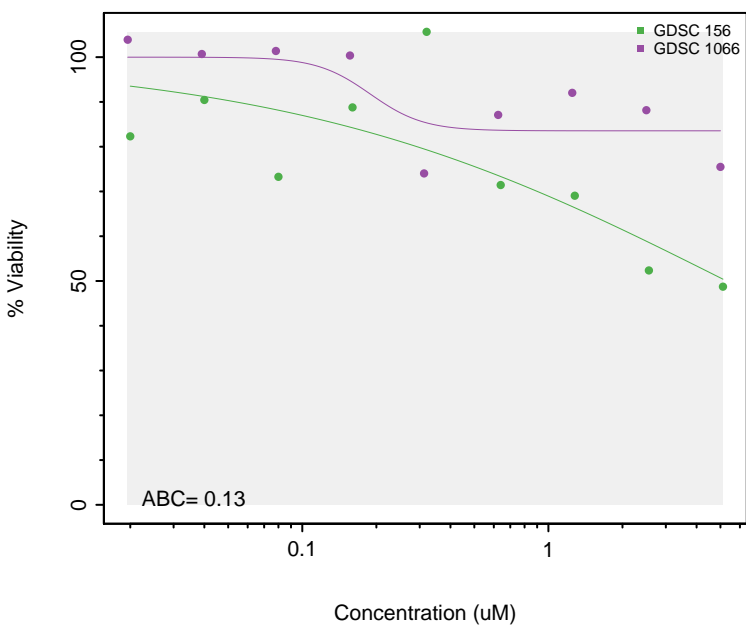

AZD6482:JVM-2

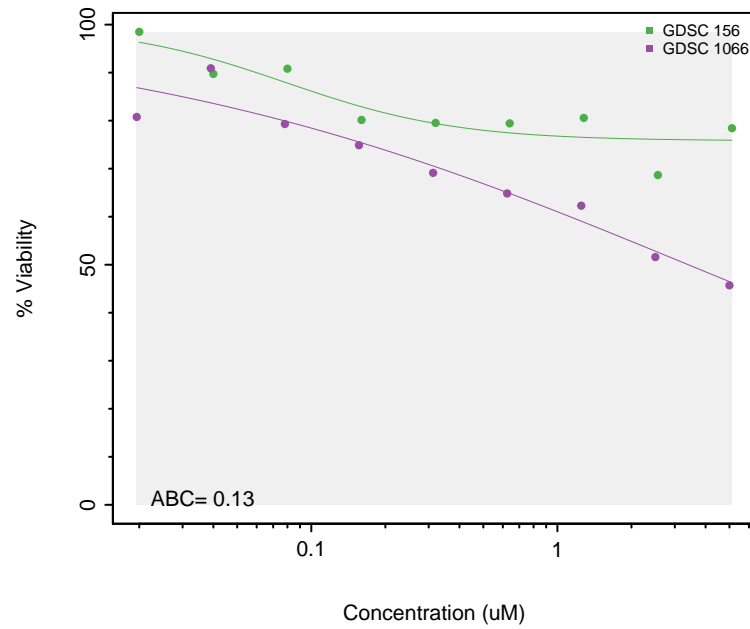

AZD6482:KP-N-YN

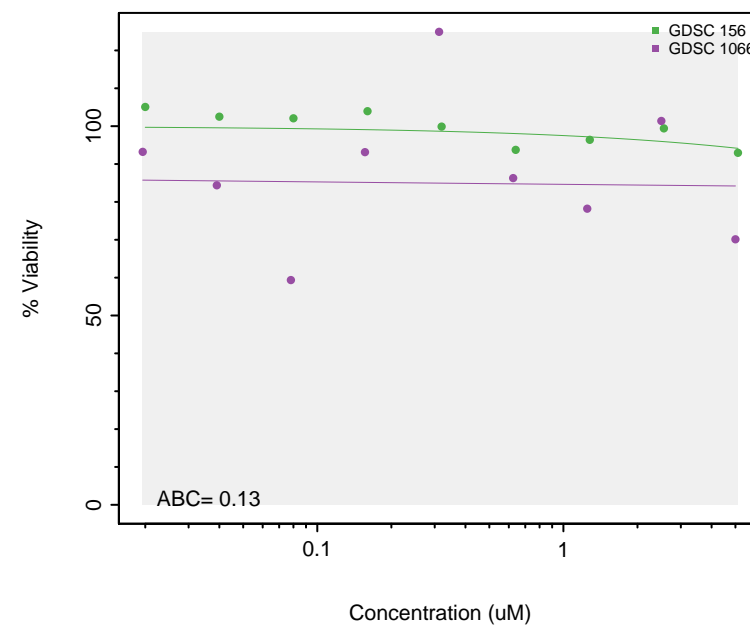

AZD6482:23132-87

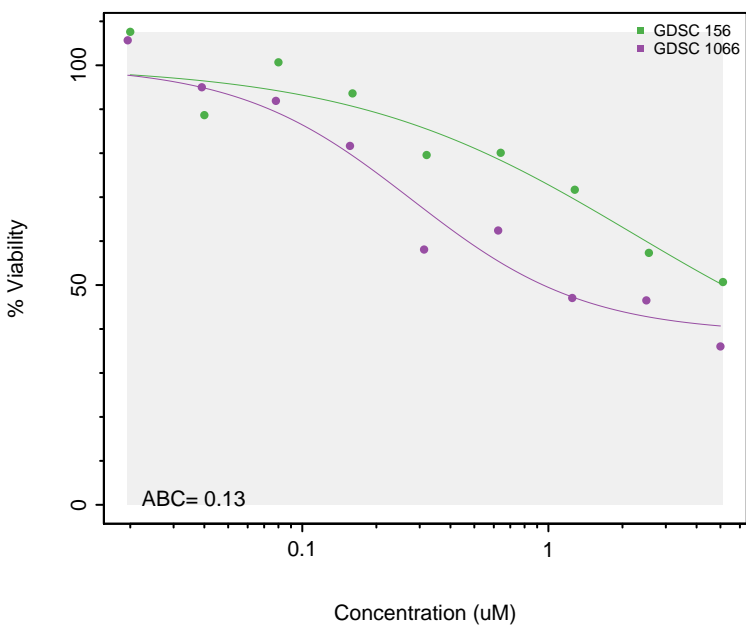

AZD6482:KARPAS-45

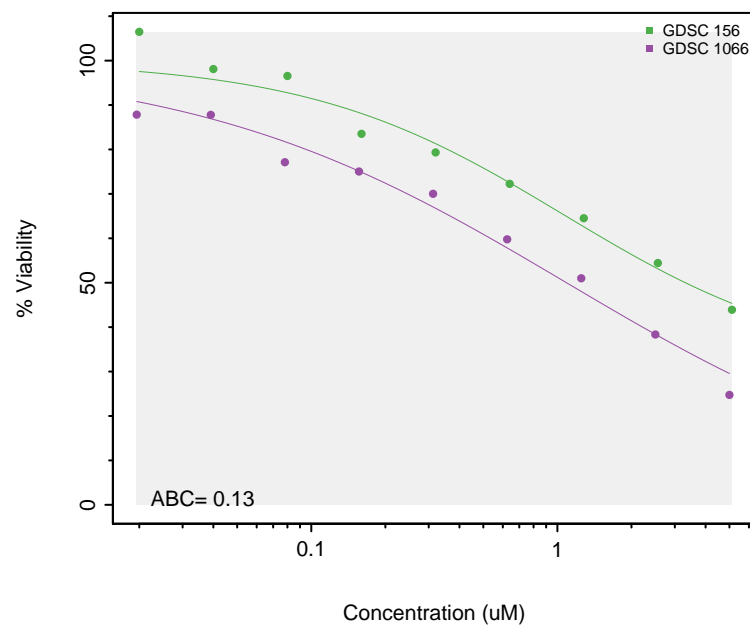

AZD6482:BHY

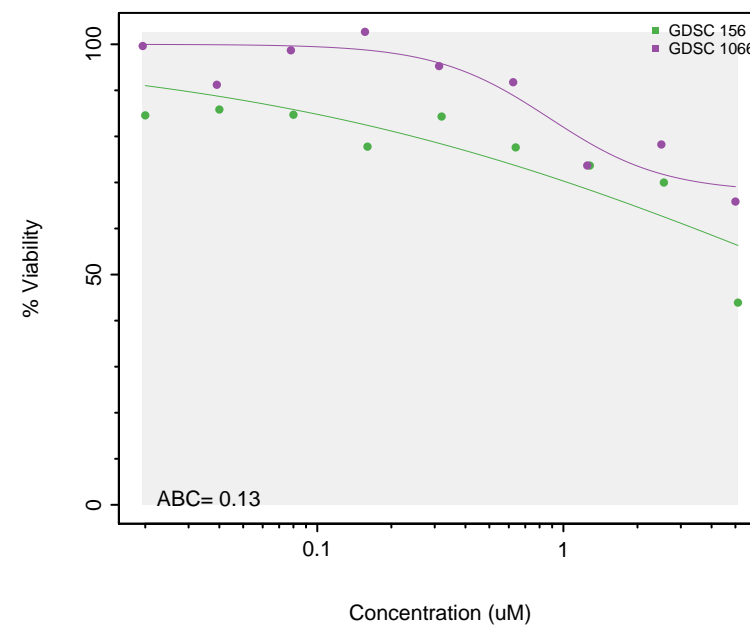

AZD6482:EFE-184

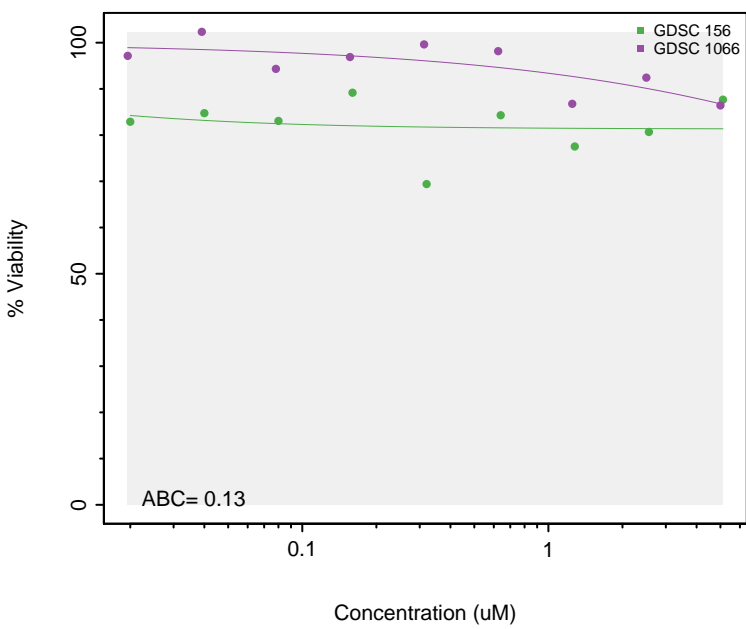

AZD6482:SW626

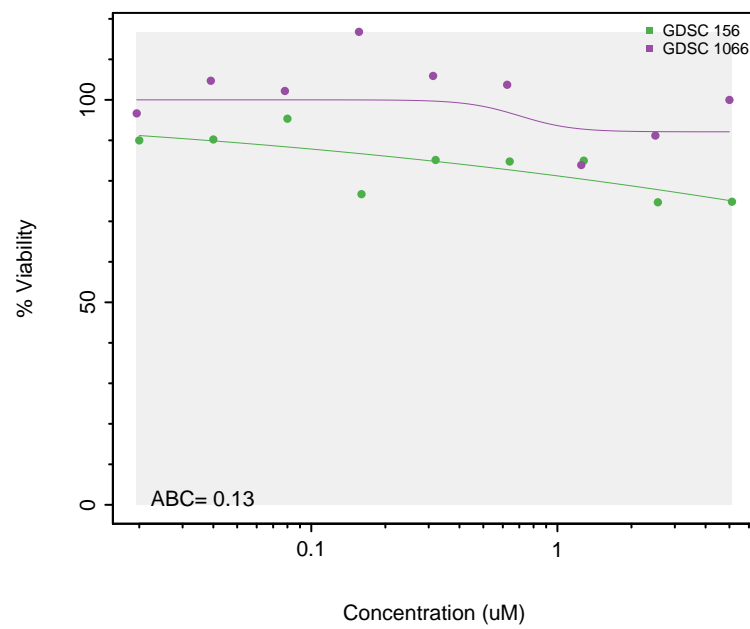

AZD6482:OVCAR-8

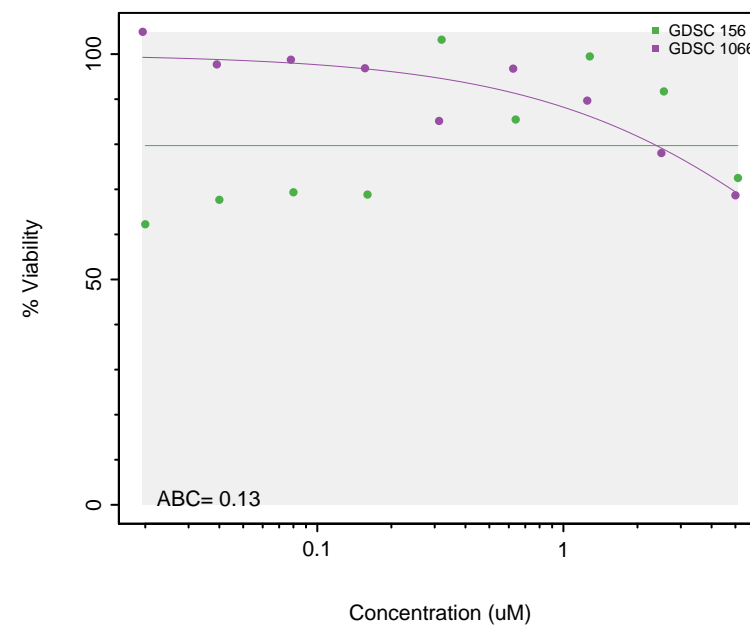



AZD6482:NCI-H1623

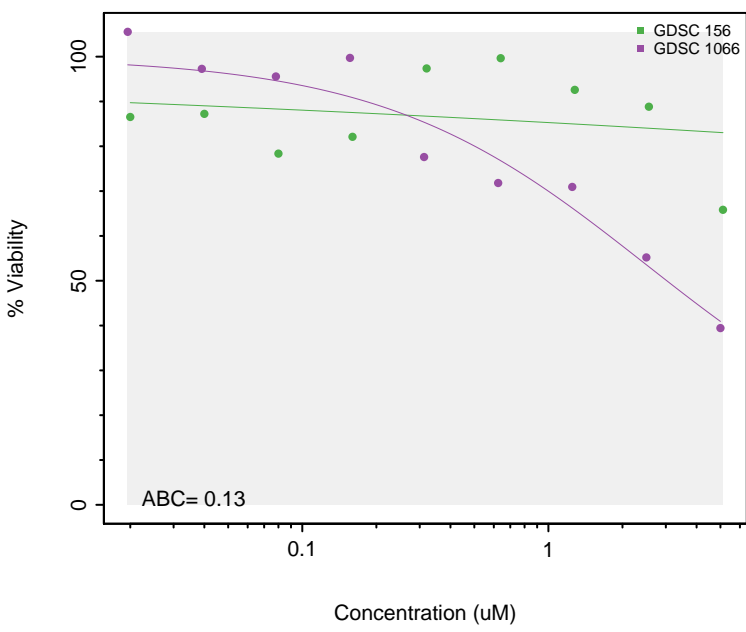

AZD6482:KNS-81-FD

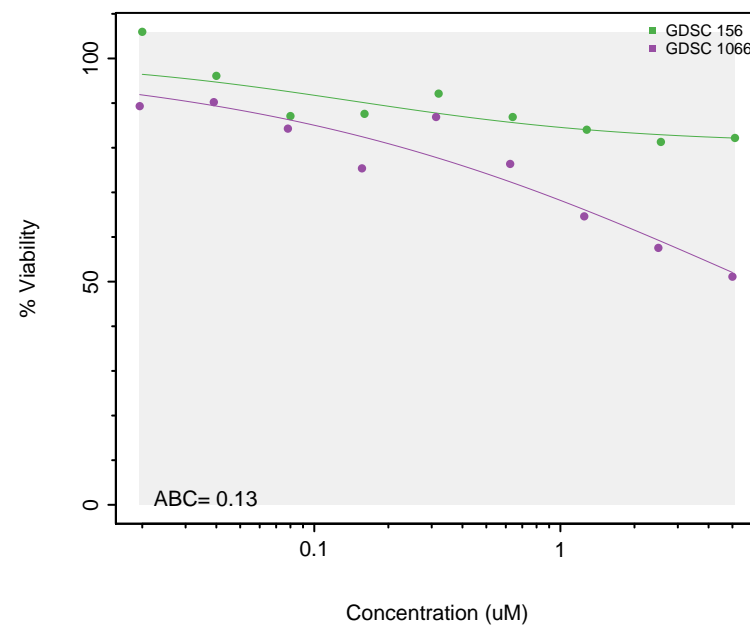

AZD6482:MHH-ES-1

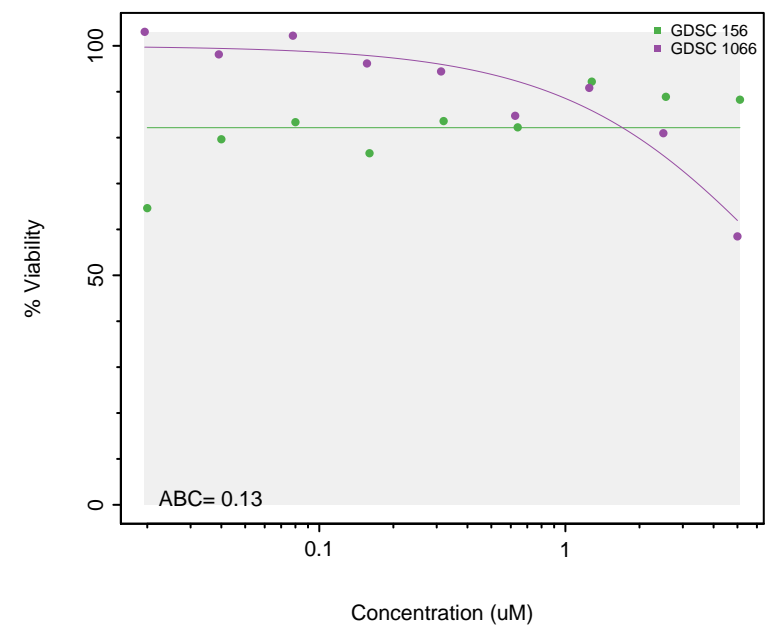

AZD6482:CMK

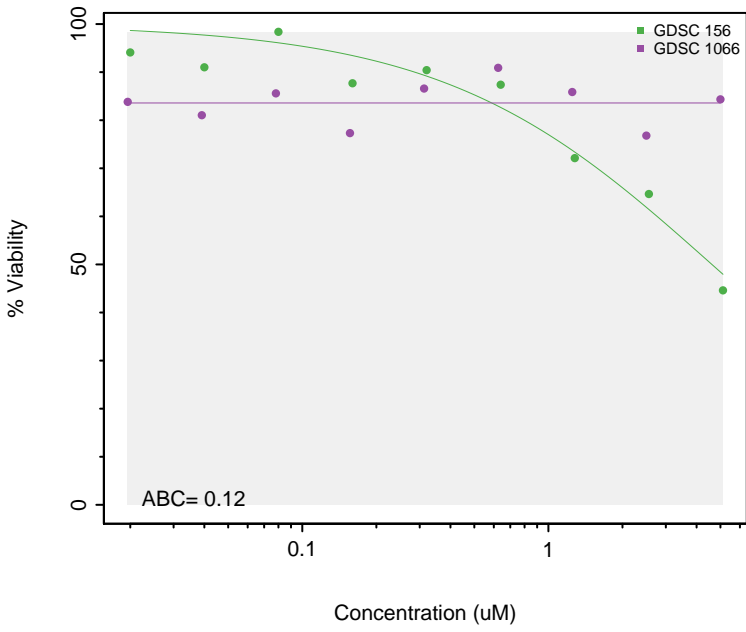

AZD6482:KMOE-2

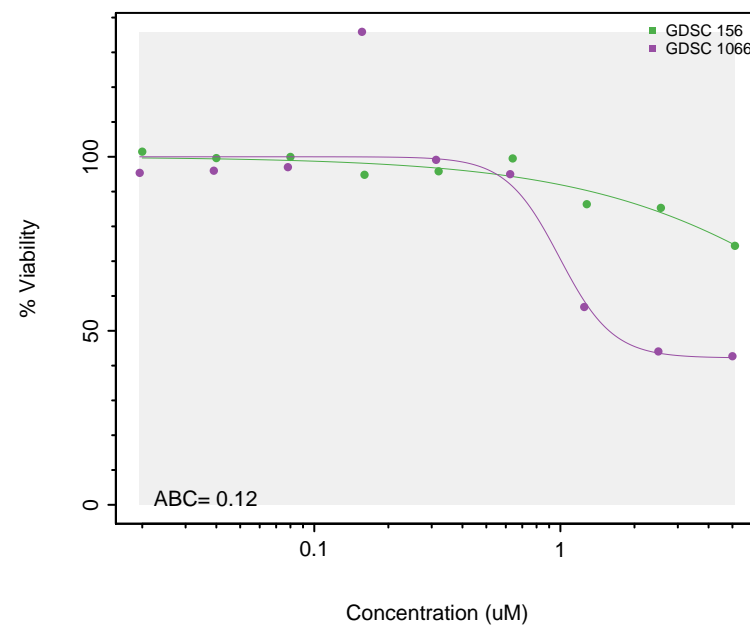

AZD6482:SK-NEP-1

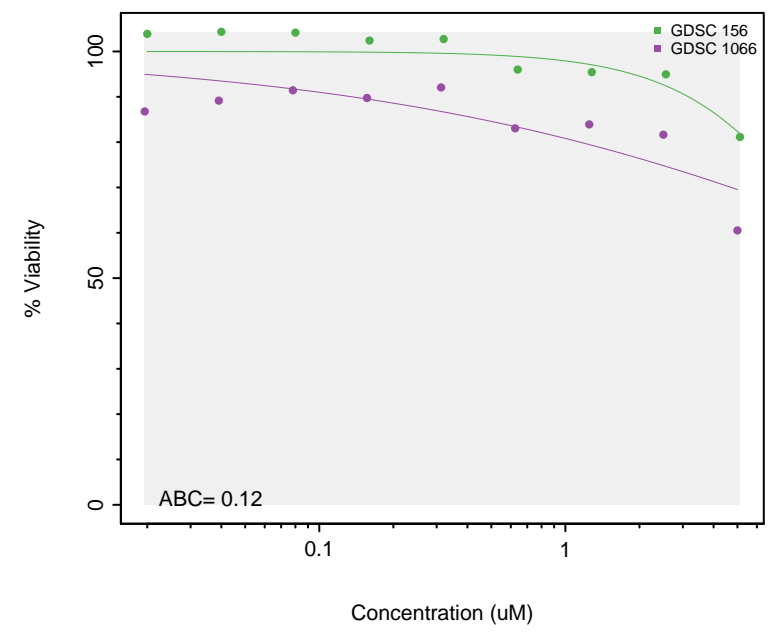

AZD6482:Hs-578-T

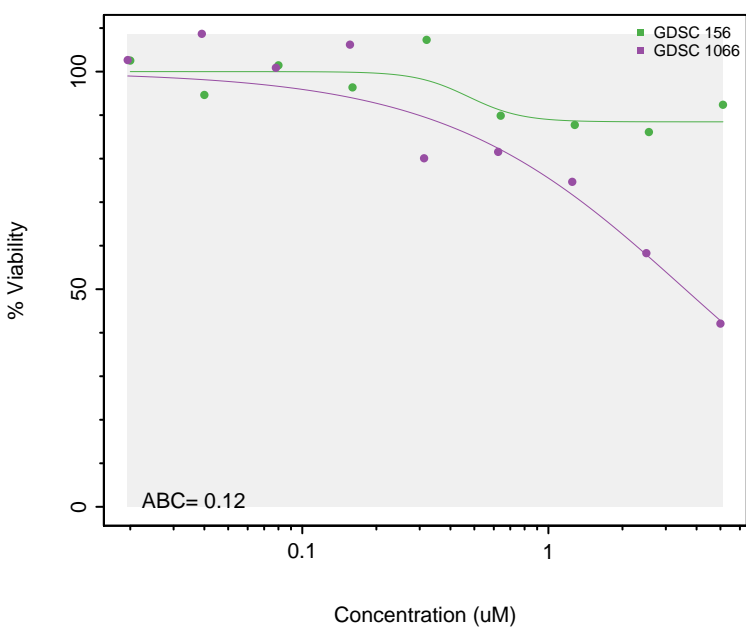

AZD6482:J-RT3-T3-5

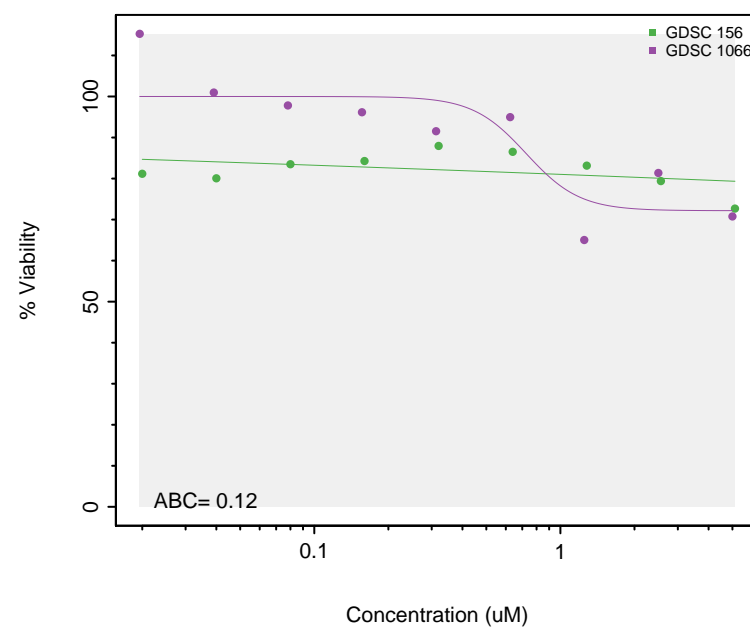

AZD6482:NCI-H520

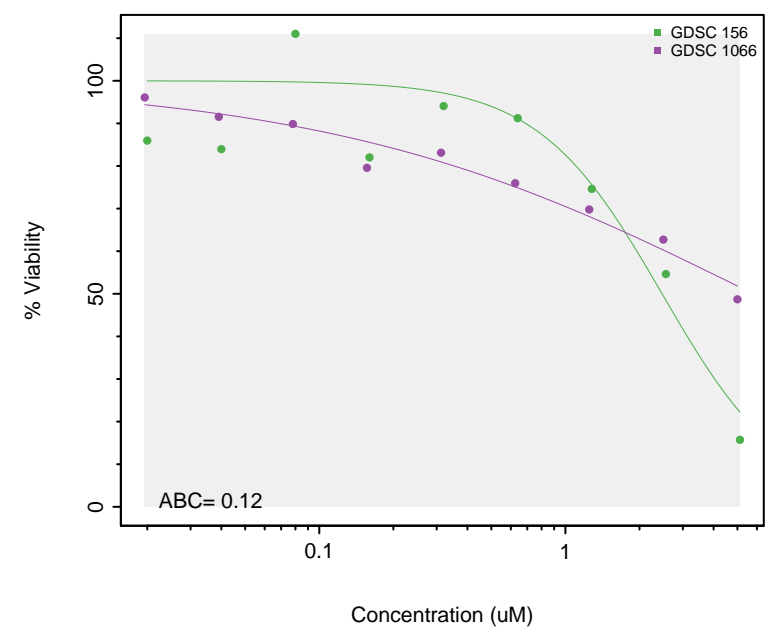

AZD6482:SNU-387

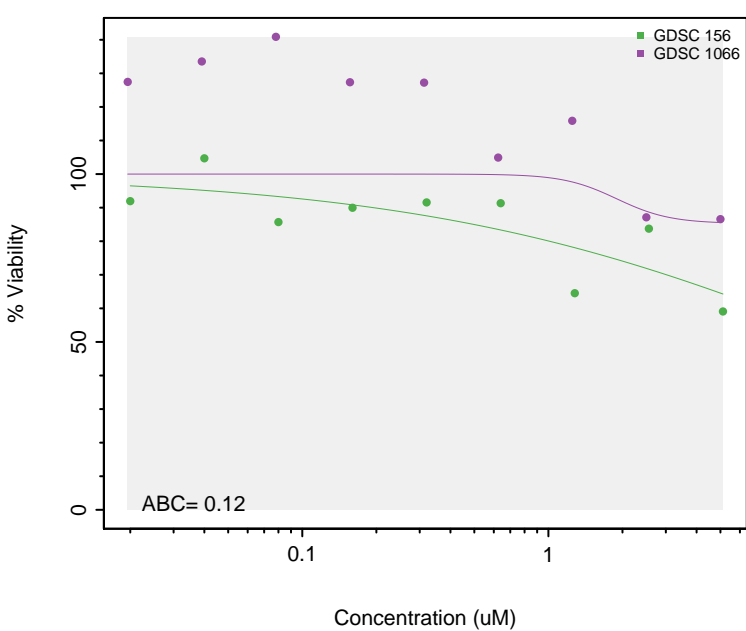

AZD6482:GAMG

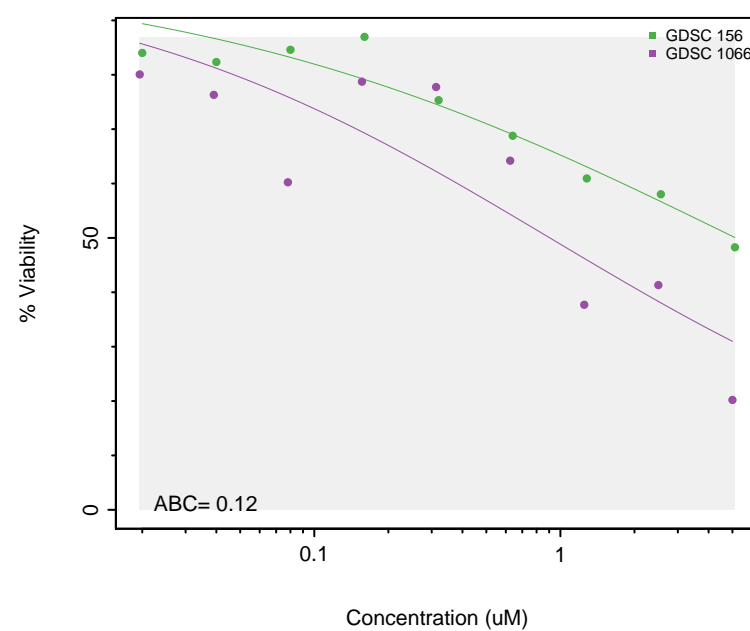

AZD6482:NCI-H446

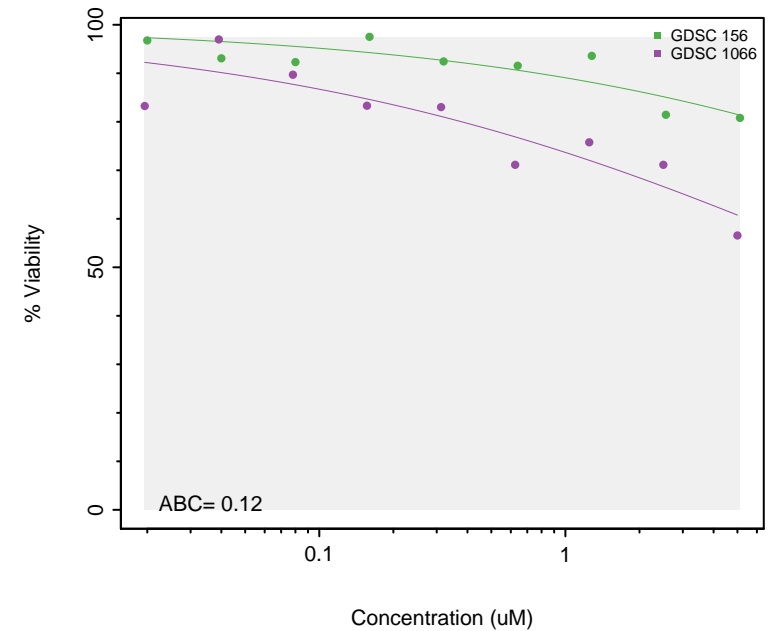

AZD6482:GI-ME-N

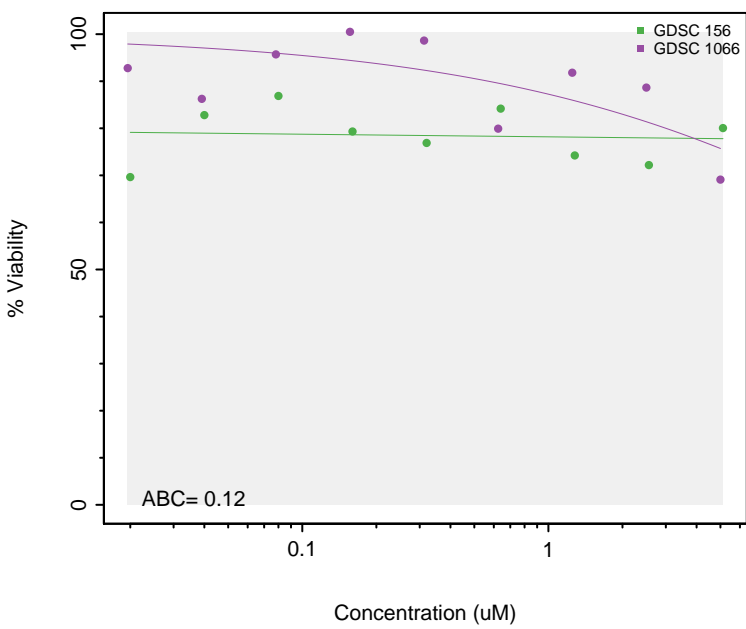

AZD6482:NCI-H1648

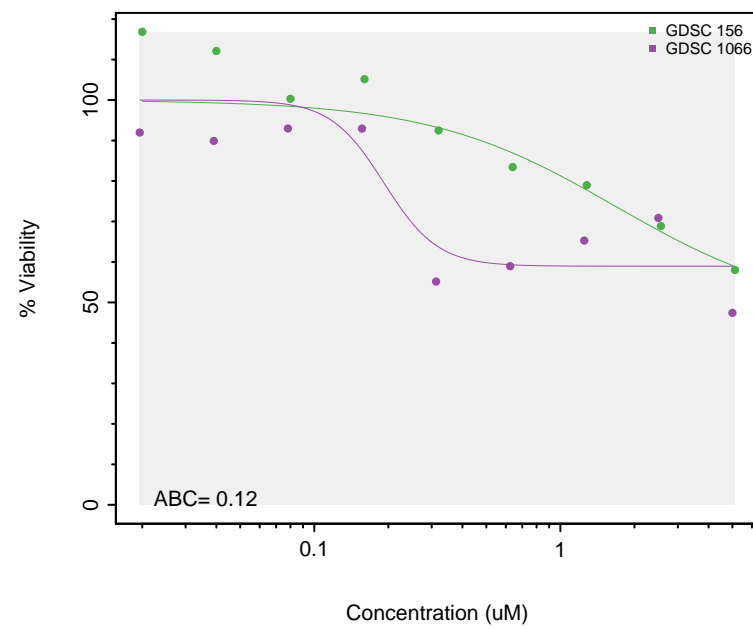

AZD6482:NB5

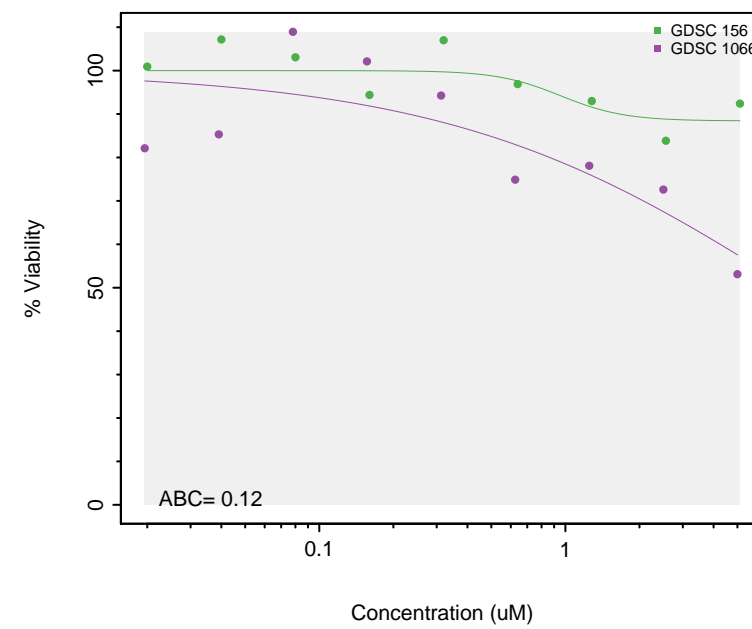

AZD6482:NCI-H2030

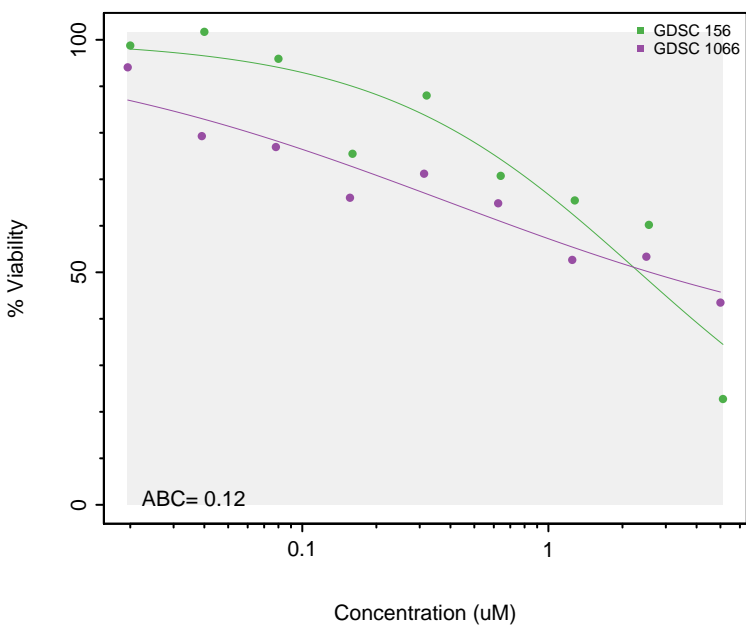

AZD6482:A253

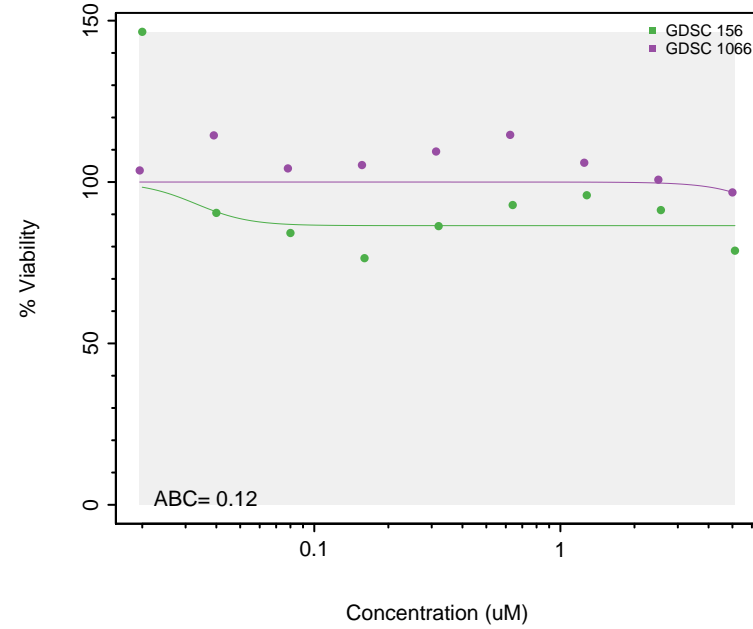

AZD6482:KYSE-180

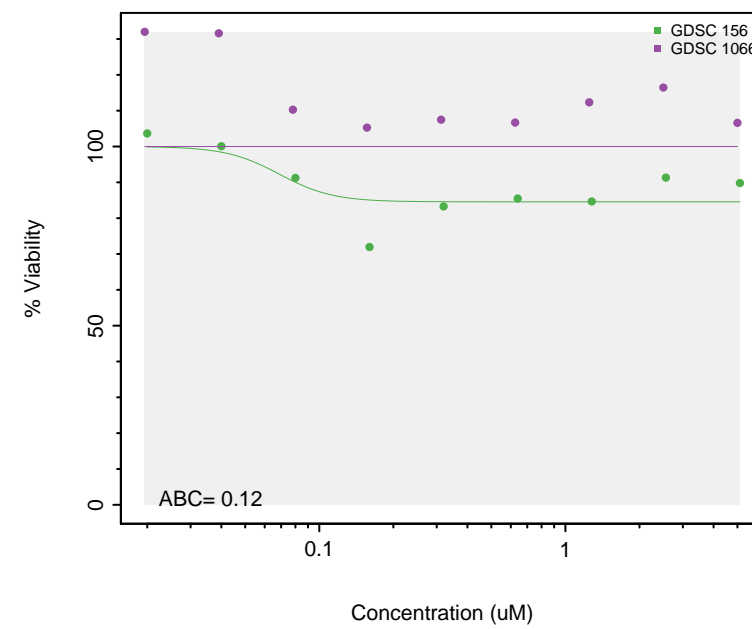

AZD6482:SW684

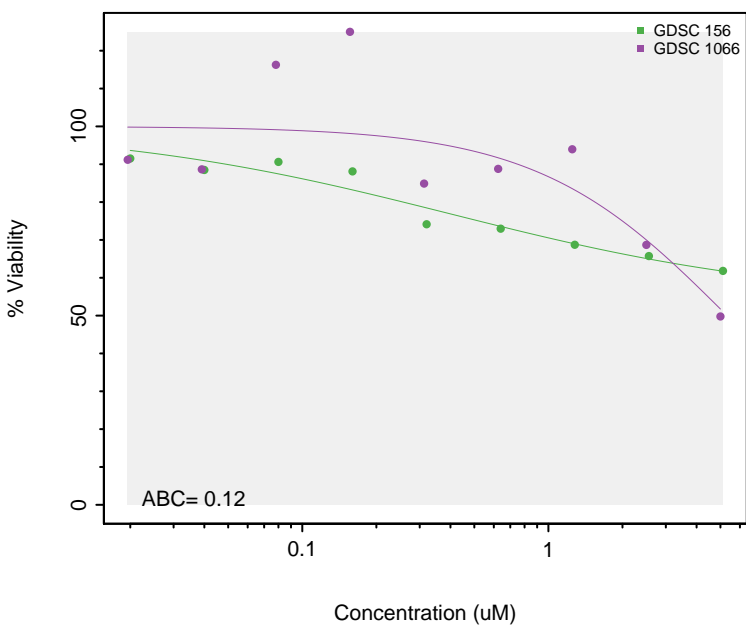

AZD6482:OE33

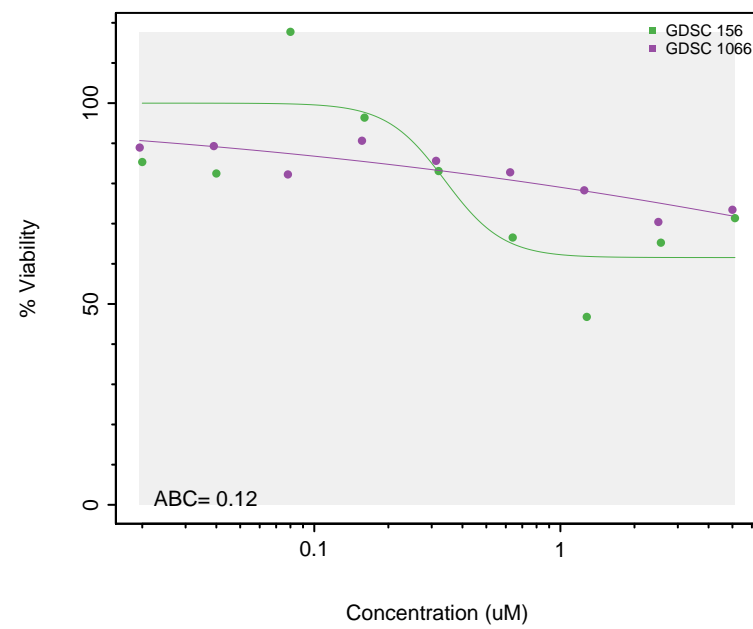

AZD6482:CAL-72

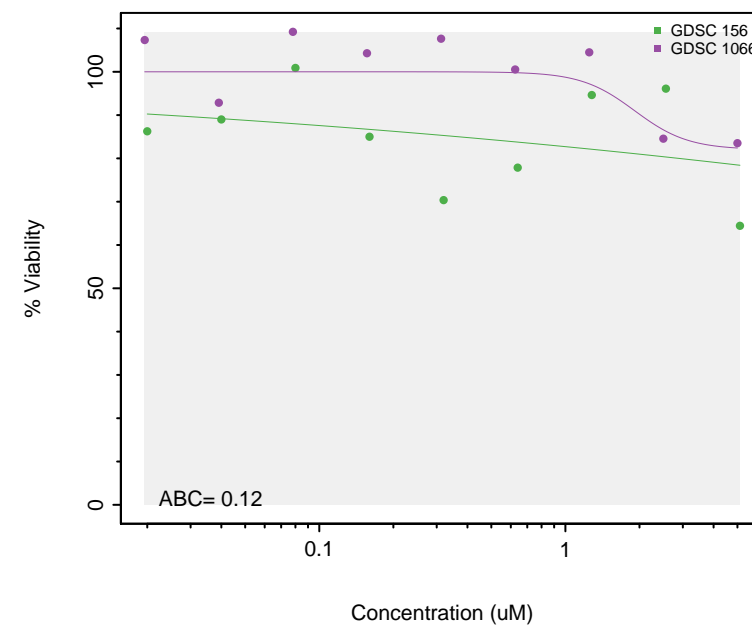

AZD6482:SK-CO-1

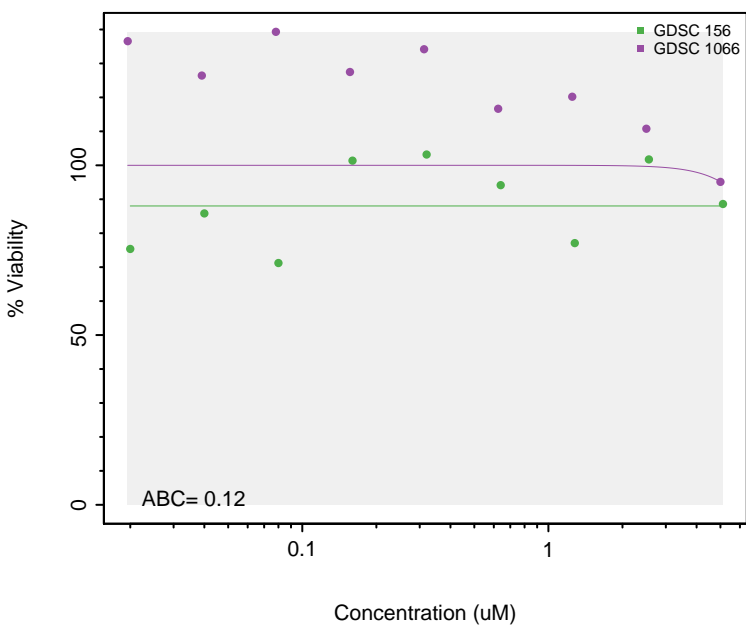

AZD6482:LXF-289

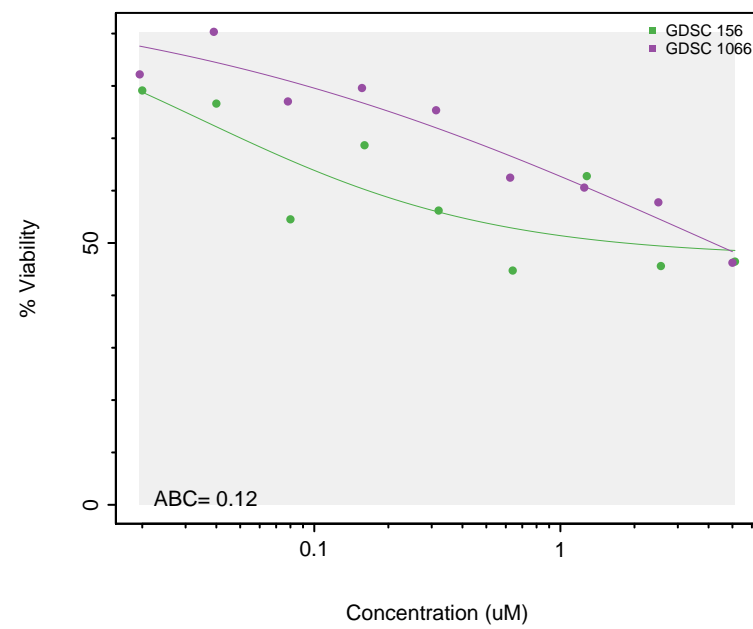

AZD6482:SCC-25

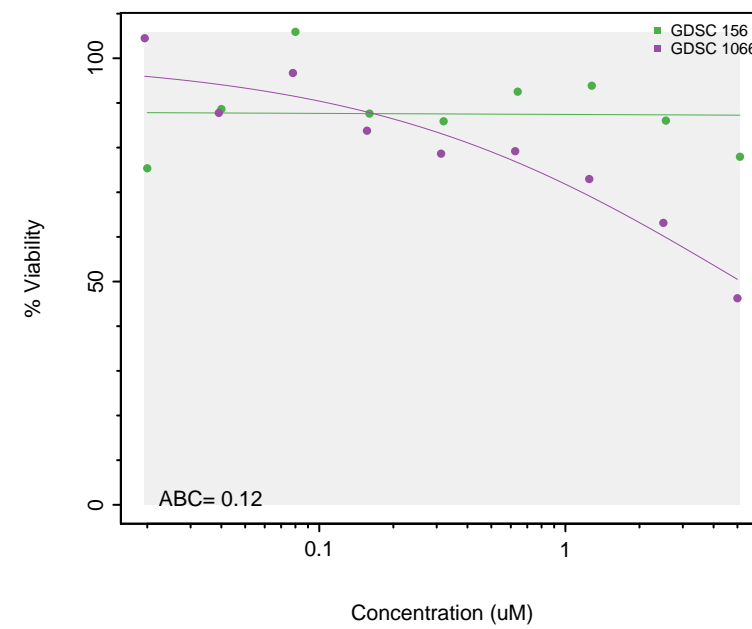

AZD6482:SCC-9

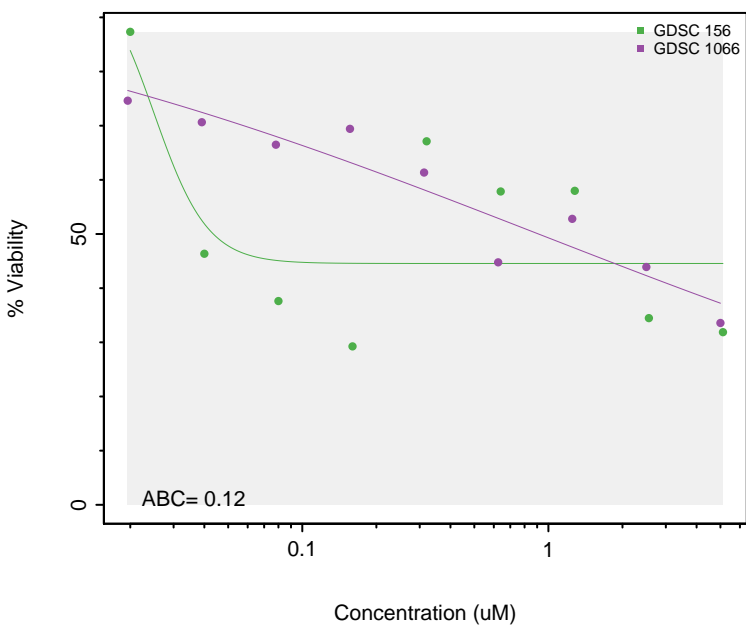

AZD6482:EB-3

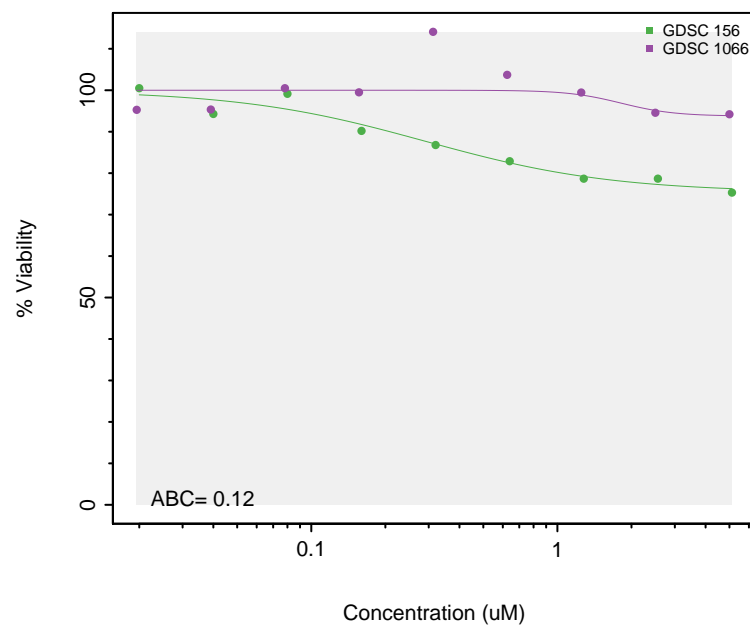

AZD6482:MC-CAR

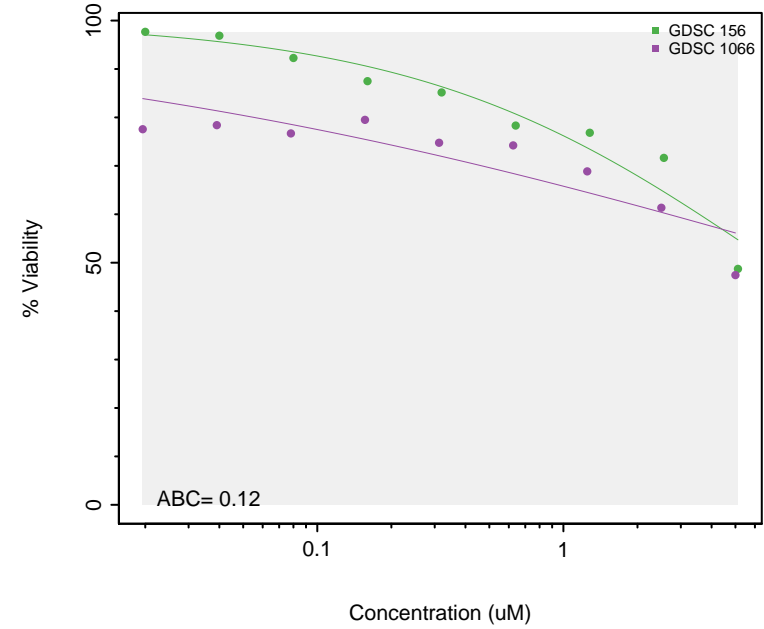

AZD6482:SNU-C1

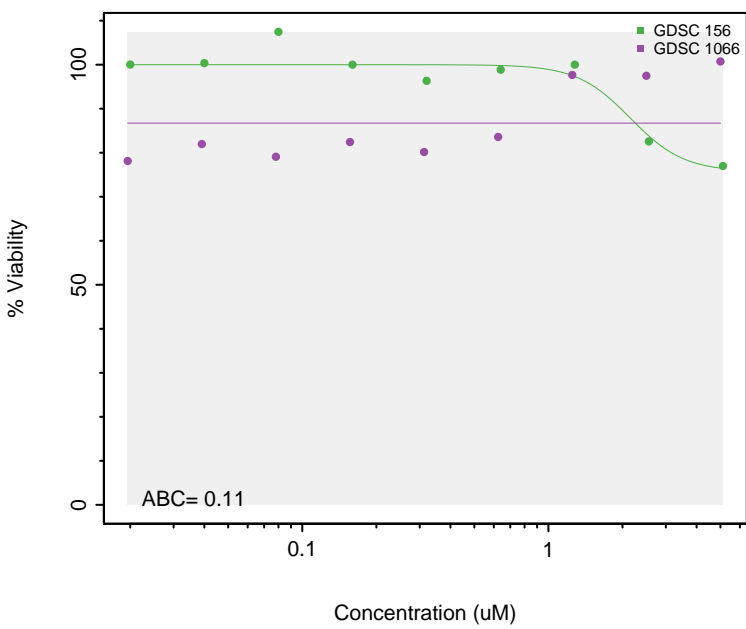

AZD6482:HCC1806

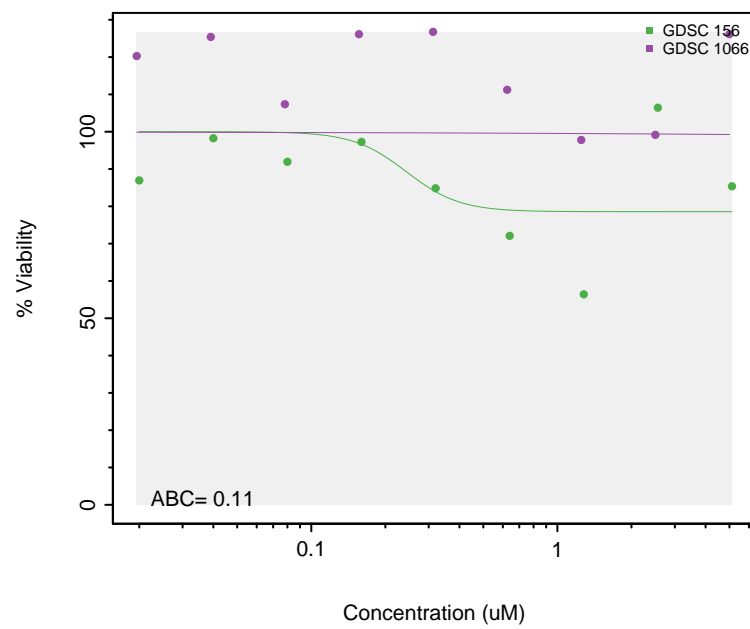

AZD6482:IST-MES1

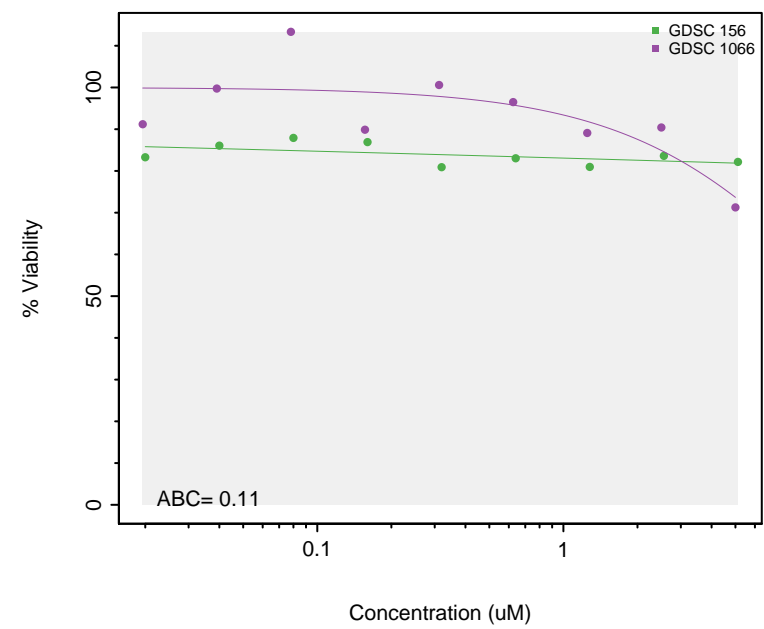

AZD6482:KE-37

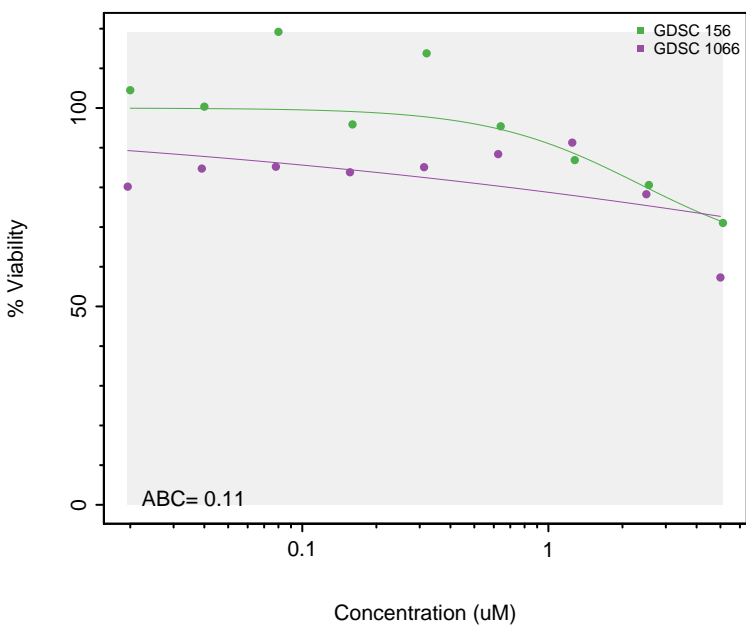

AZD6482:SR

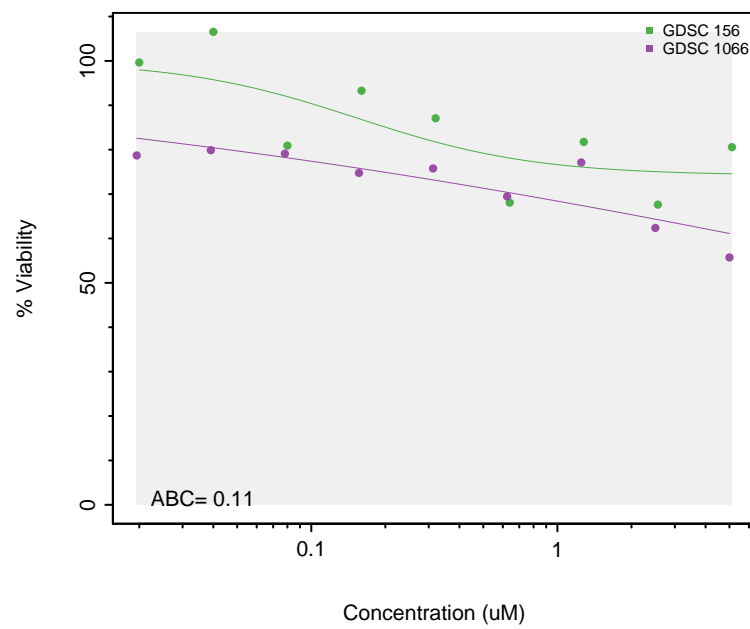

AZD6482:NOMO-1

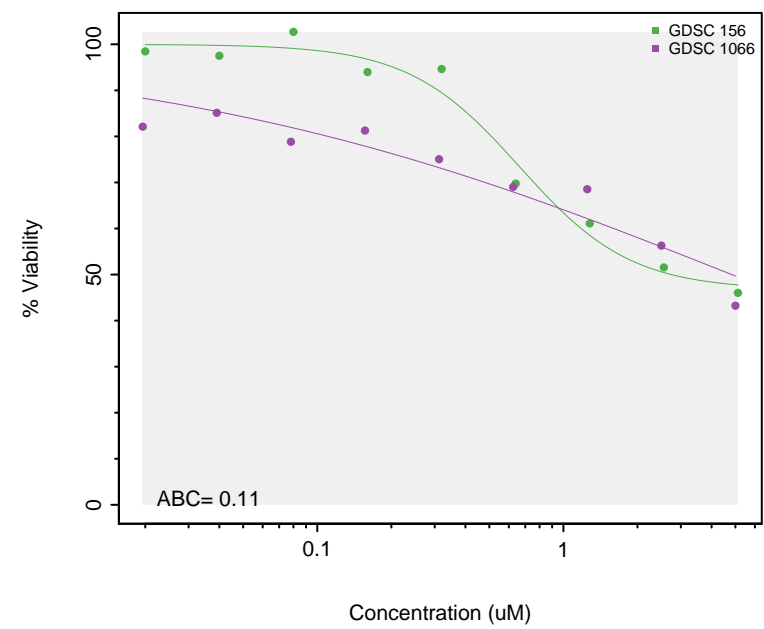

AZD6482:YKG-1

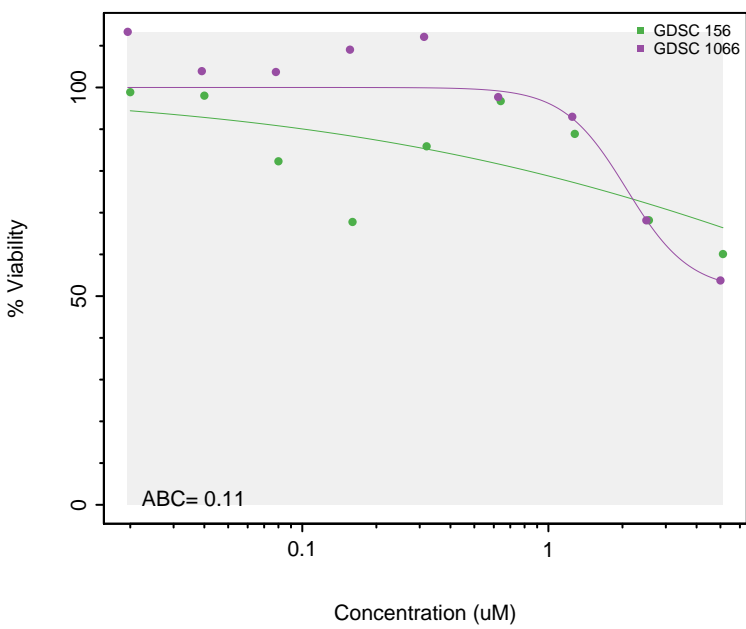

AZD6482:BC-1

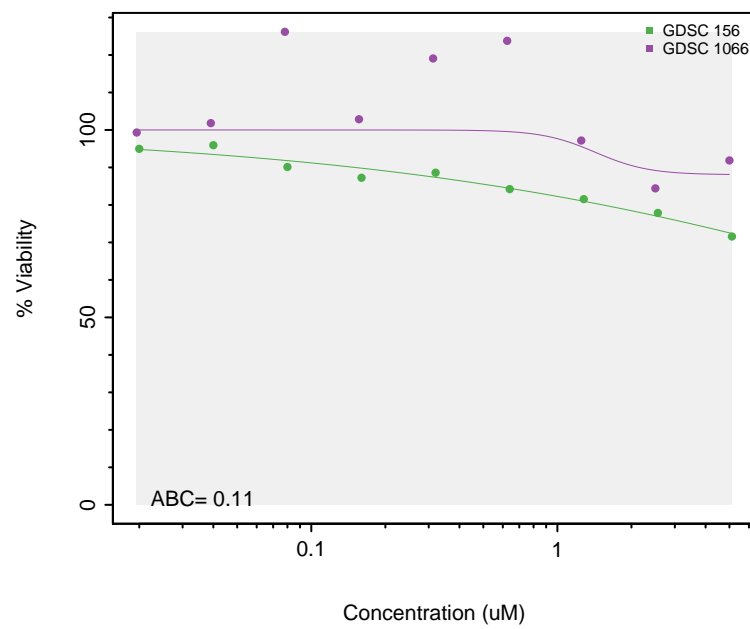

AZD6482:Ca9-22

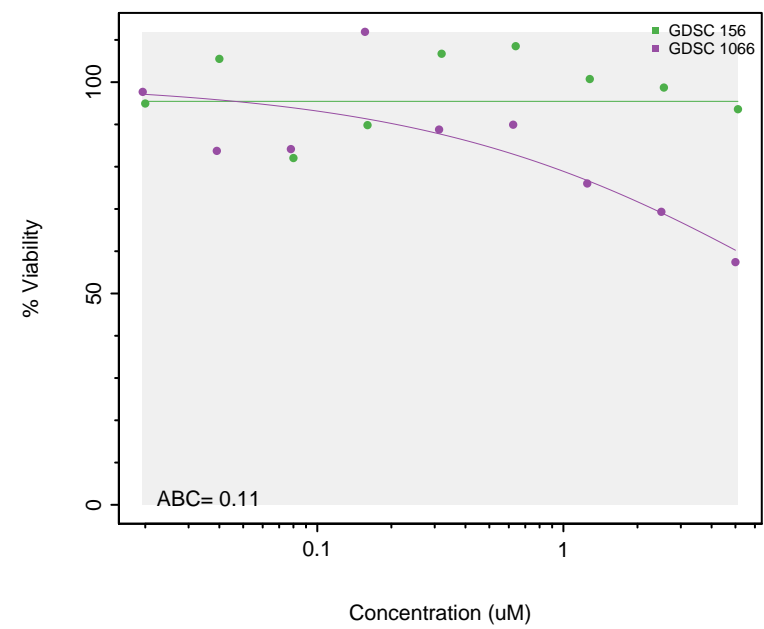

AZD6482:MFE-280

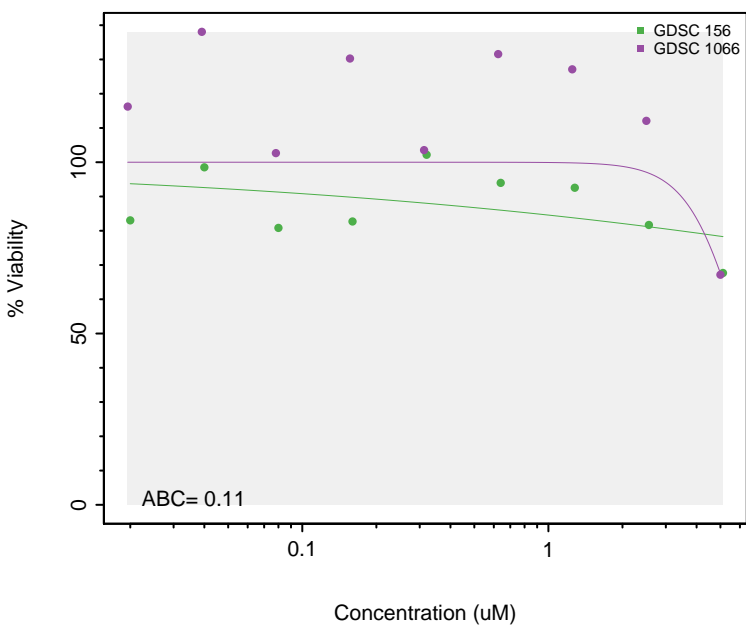

AZD6482:NCI-H2126

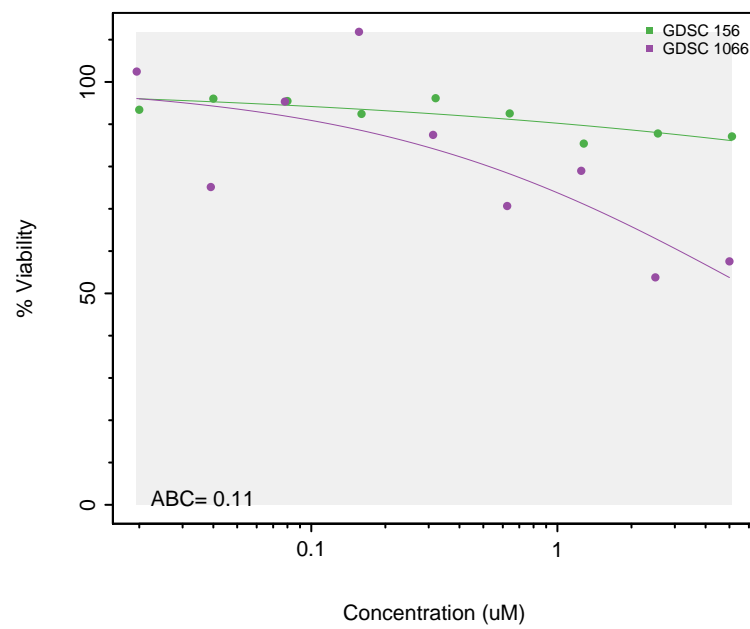

AZD6482:MKN1

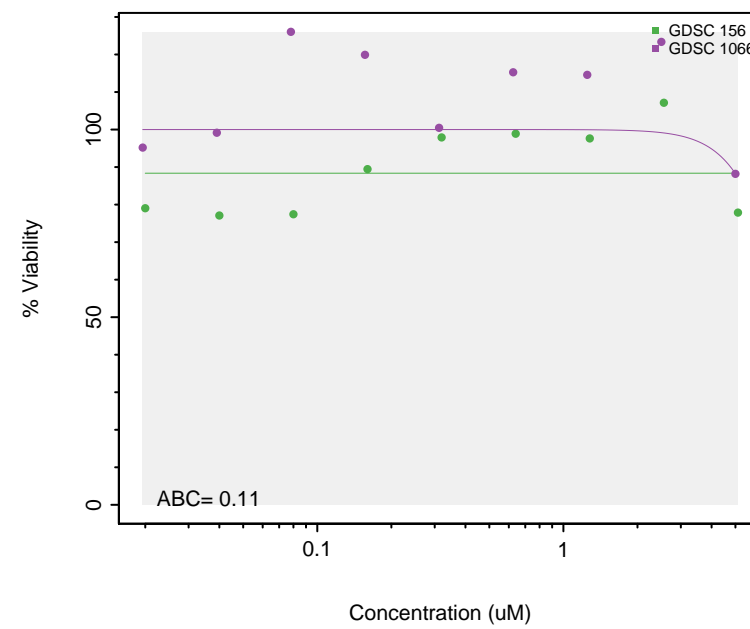

AZD6482:HuO9

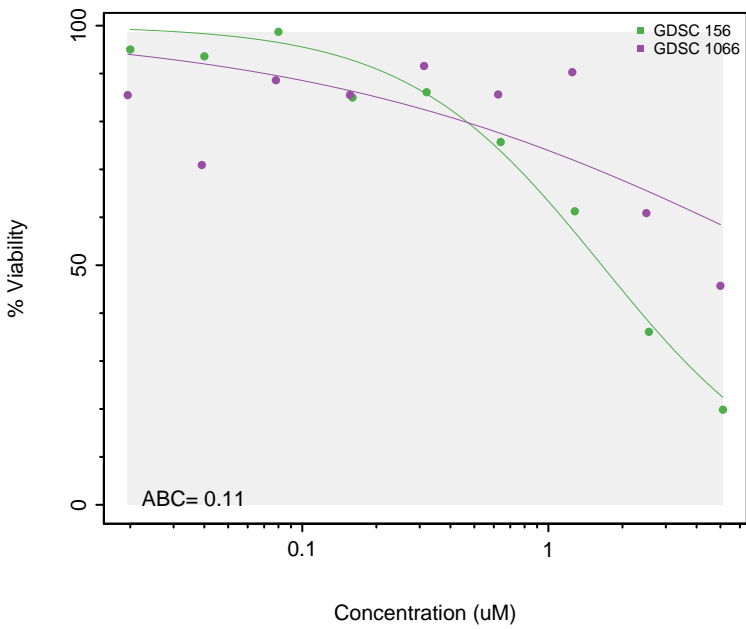

AZD6482:HuO-3N1

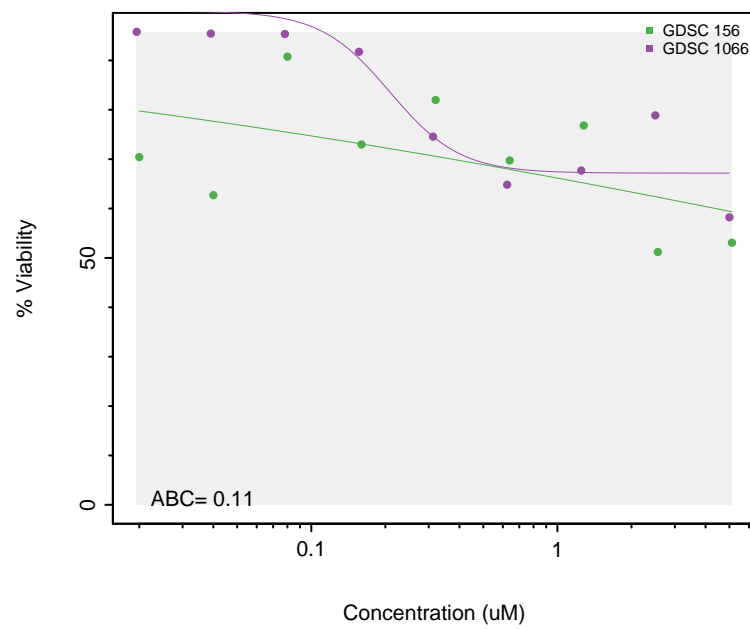

AZD6482:no-10

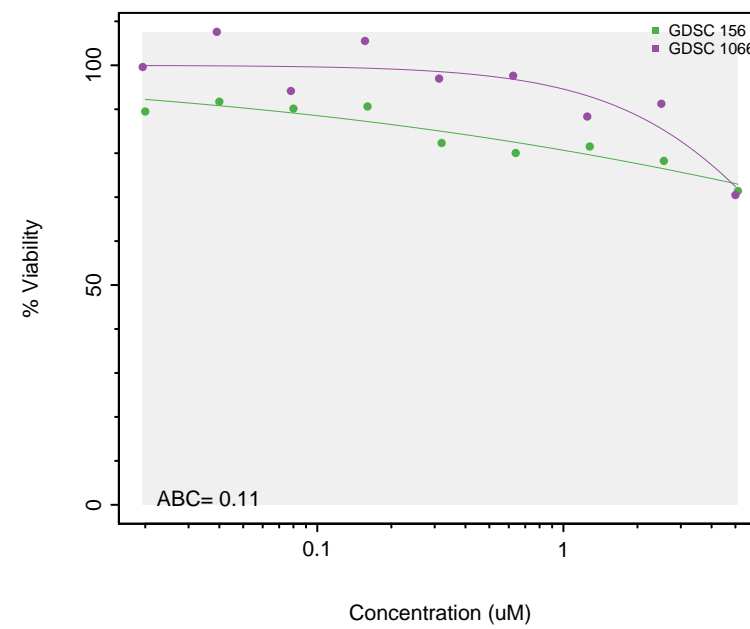

AZD6482:PF-382

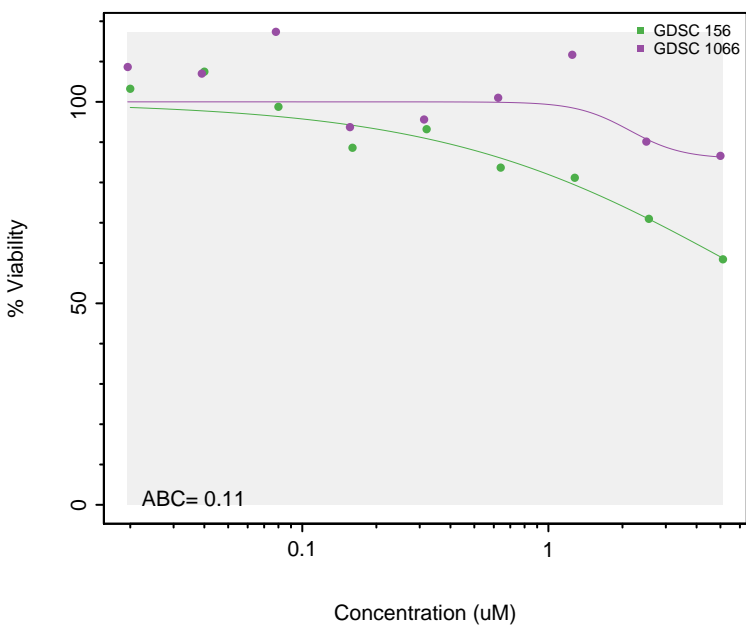

AZD6482:EFO-27

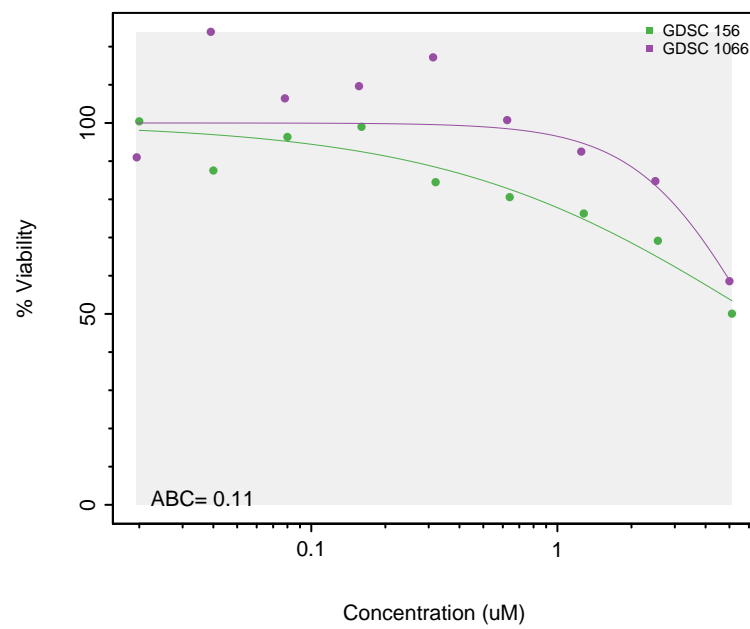

AZD6482:LCLC-103H

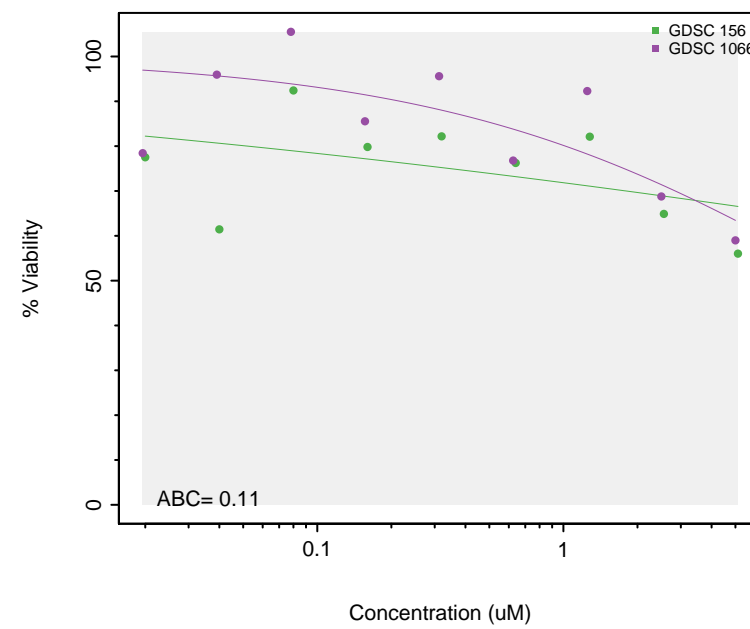

AZD6482:LAMA-84

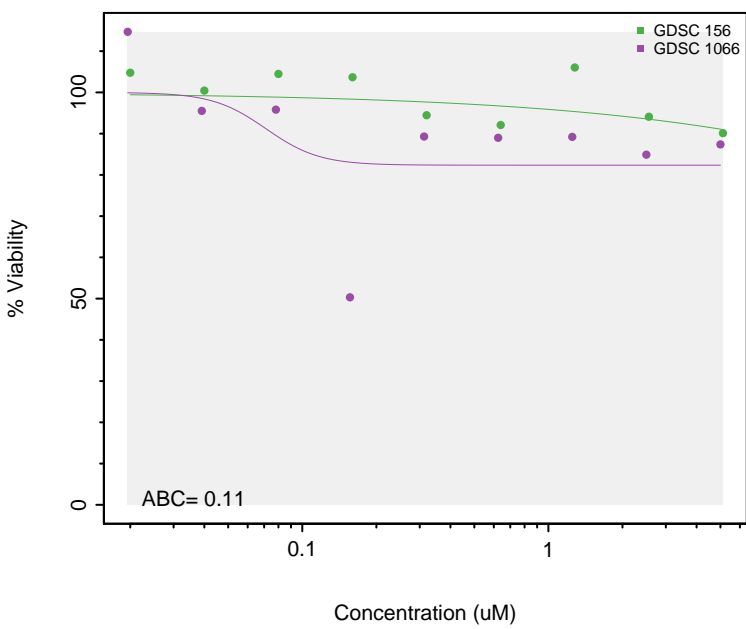

AZD6482:CAL-33

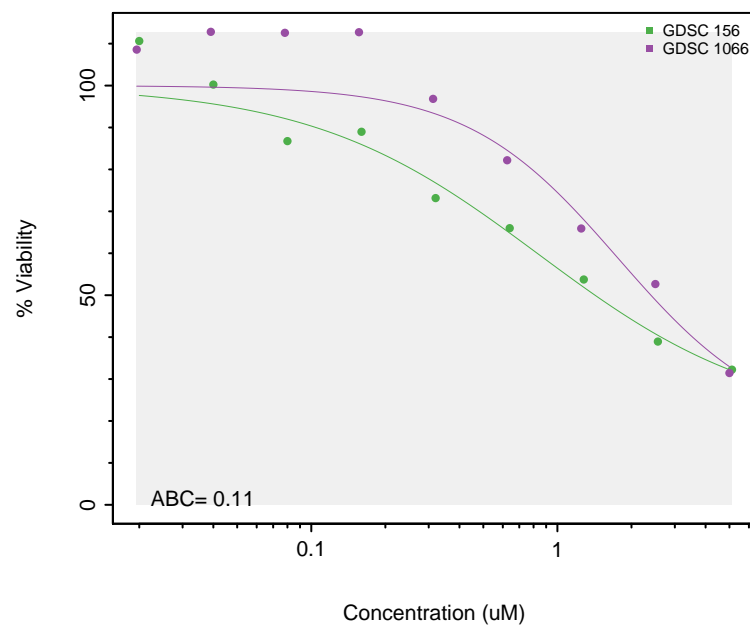

AZD6482:HOP-62

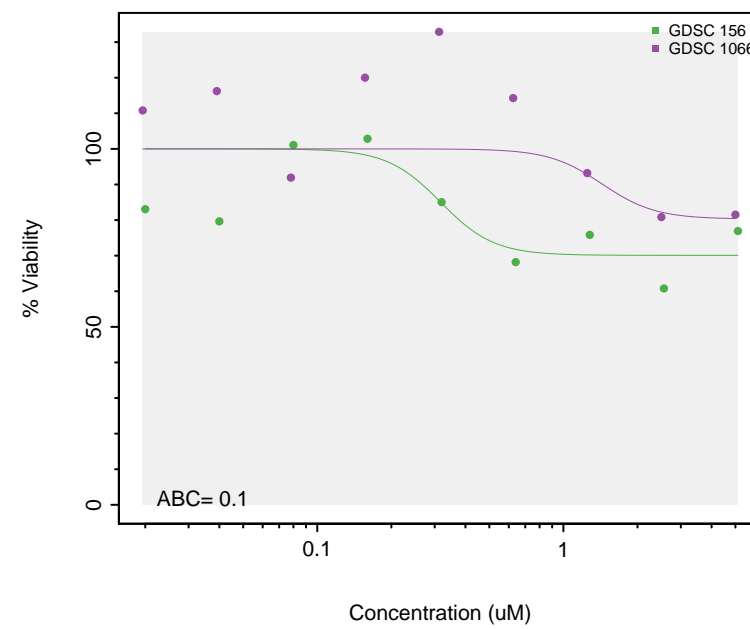

AZD6482:BxPC-3

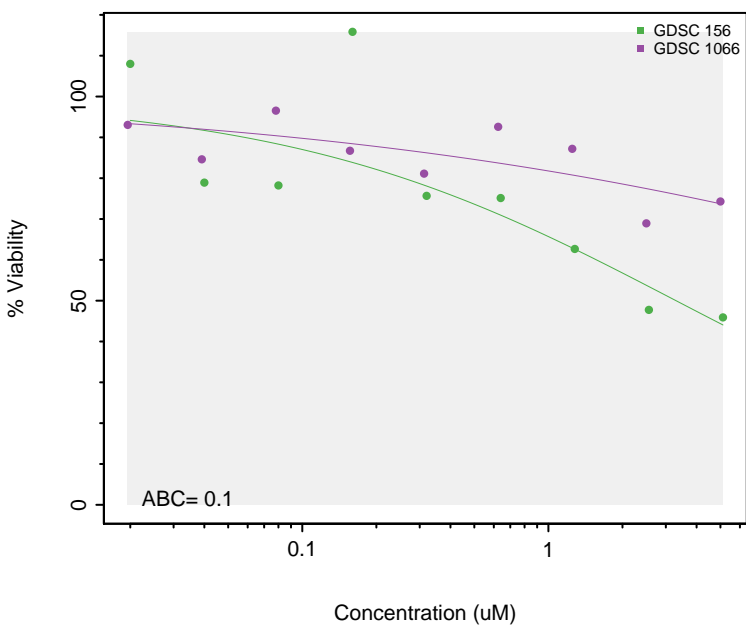

AZD6482:NCI-H838

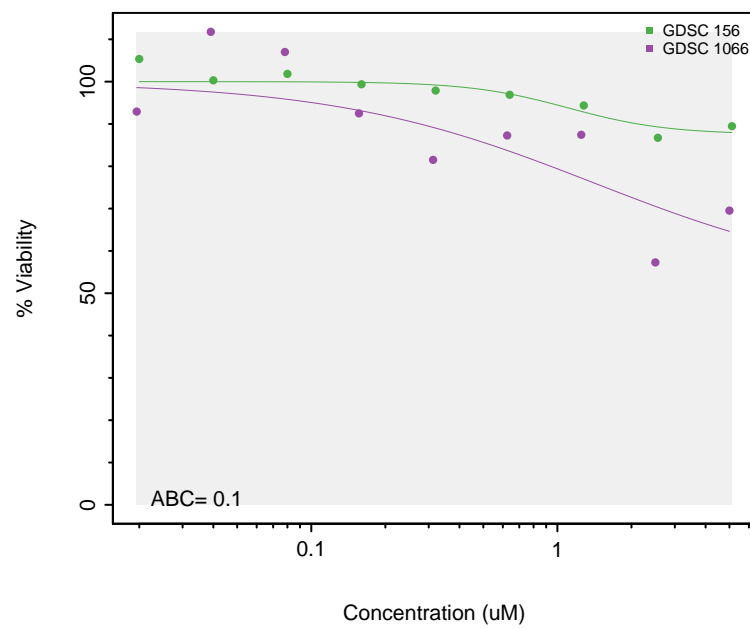

AZD6482:TUR

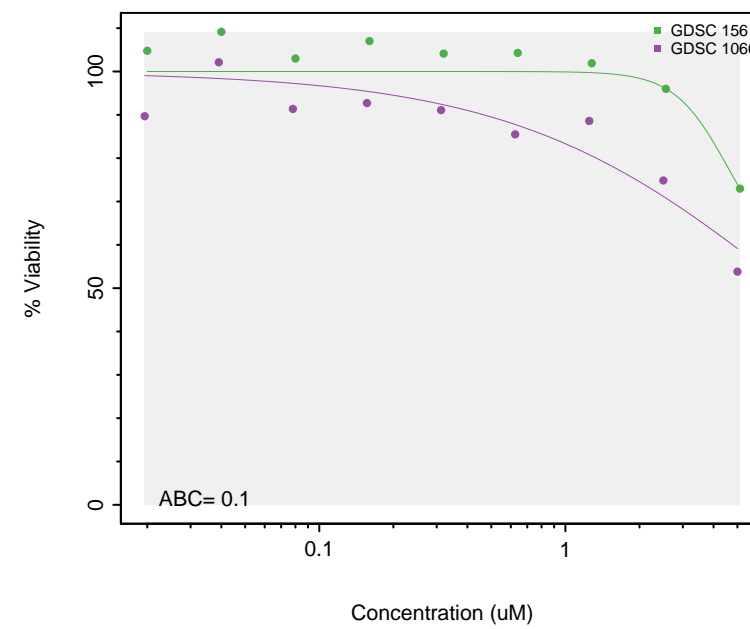

AZD6482:COLO-680N

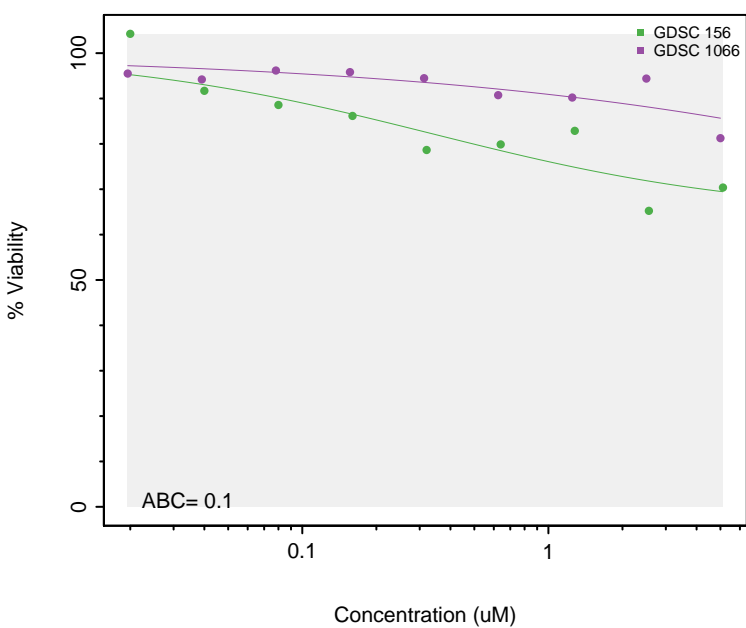

AZD6482:647-V

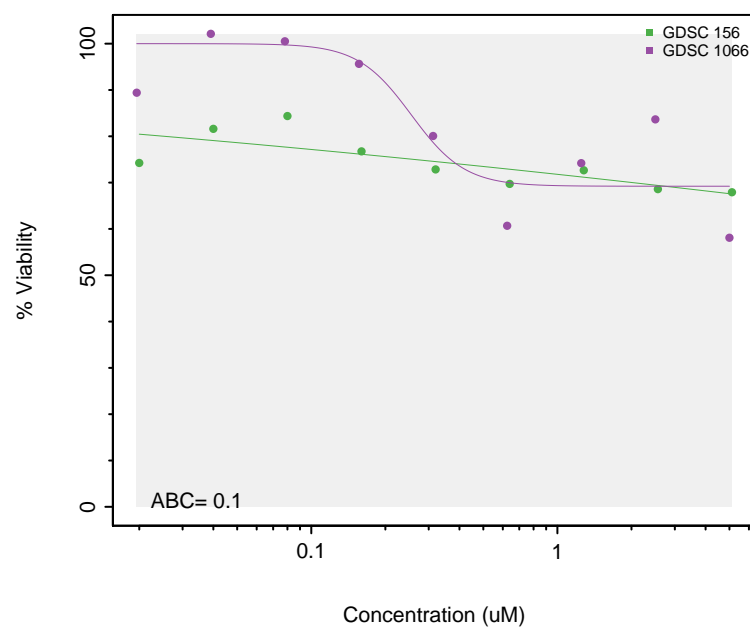

AZD6482:MHH-PREB-1

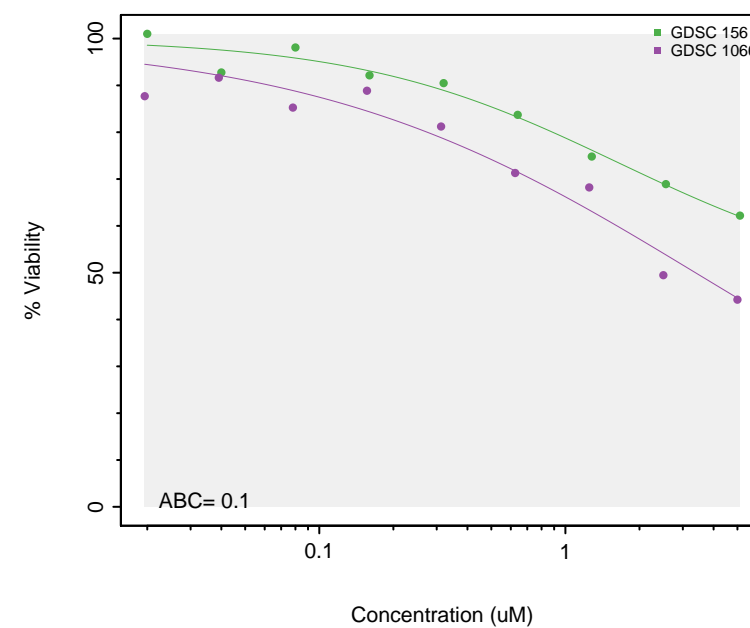

AZD6482:TYK-nu

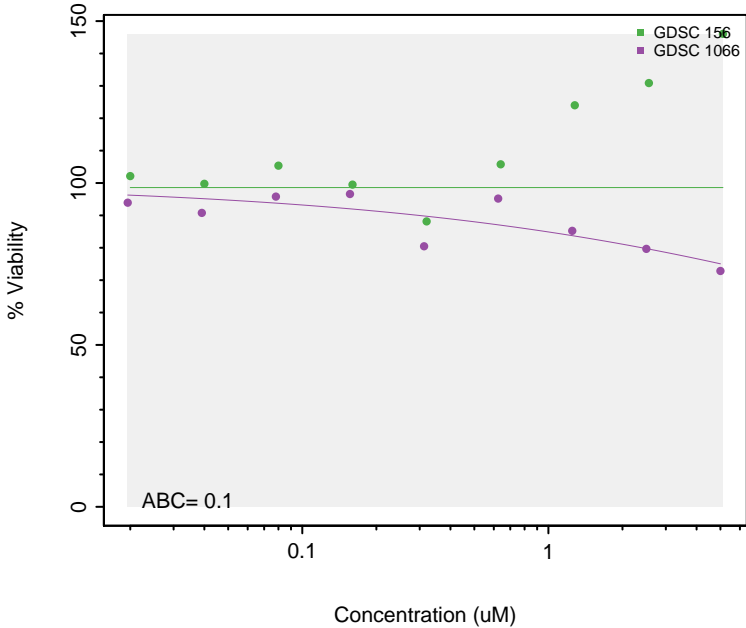

AZD6482:EW-11

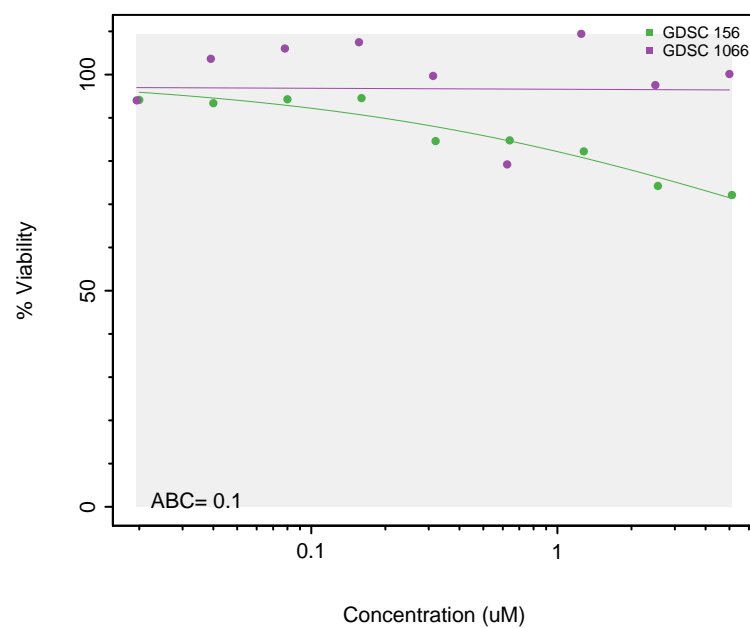

AZD6482:SW1088

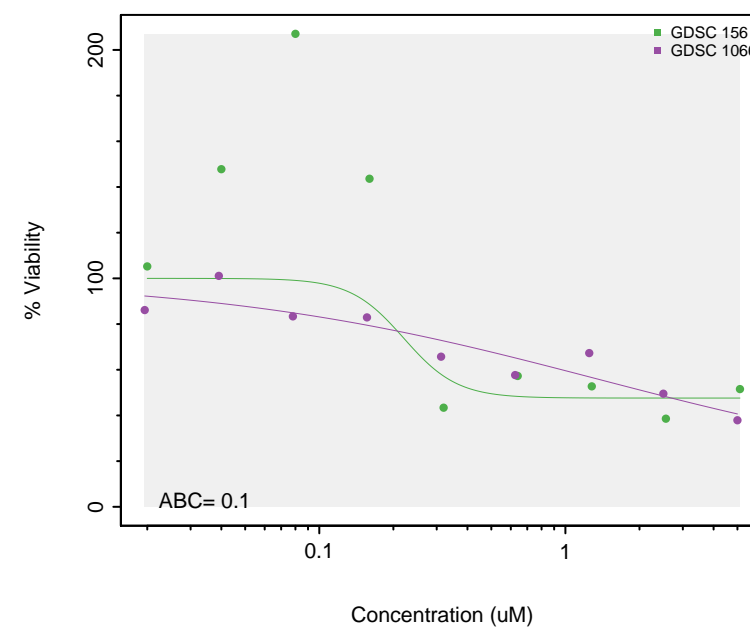

AZD6482:RPMI-8226

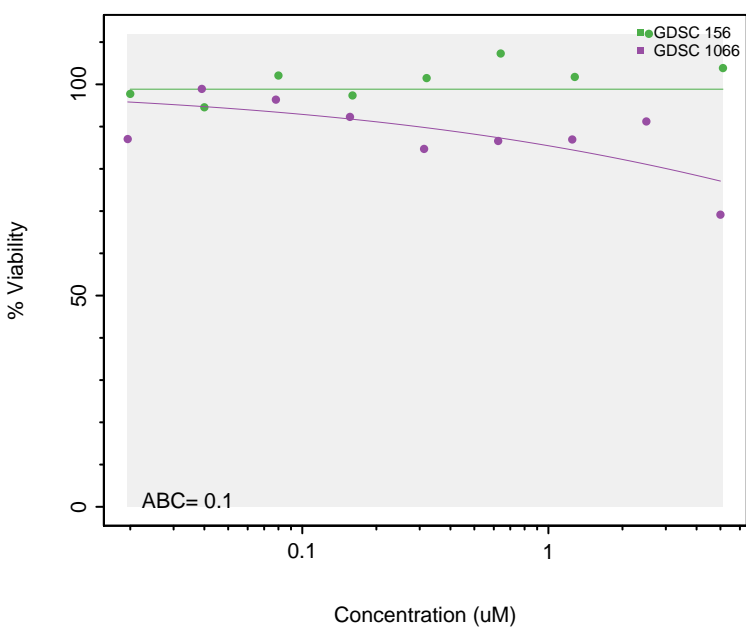

AZD6482:NB6

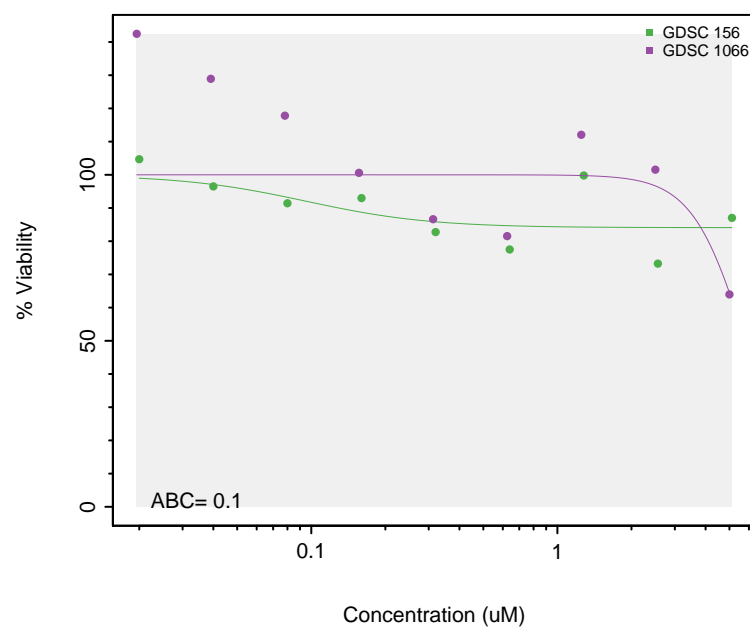

AZD6482:SH-4

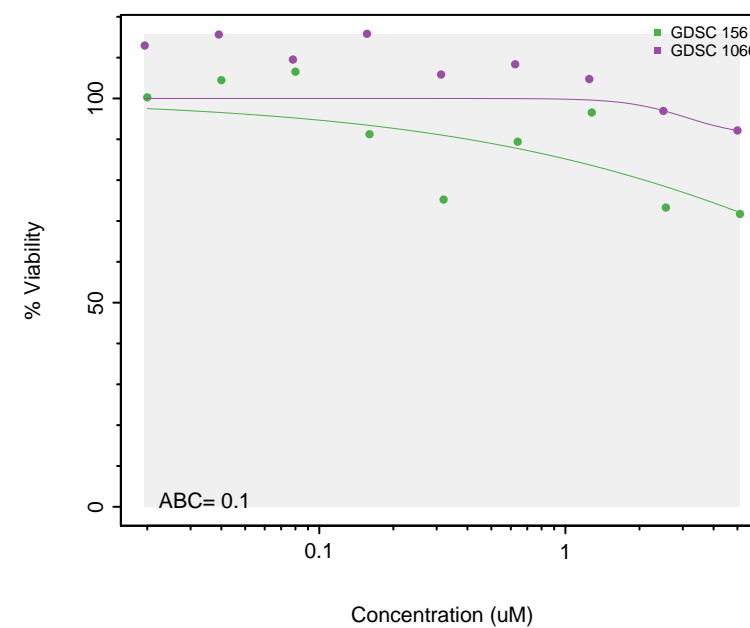

AZD6482:A2780

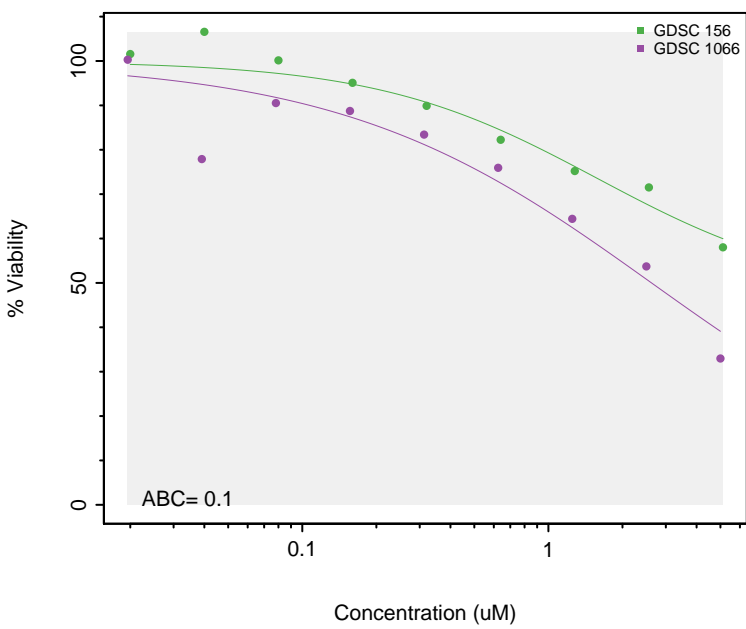

AZD6482:HT55

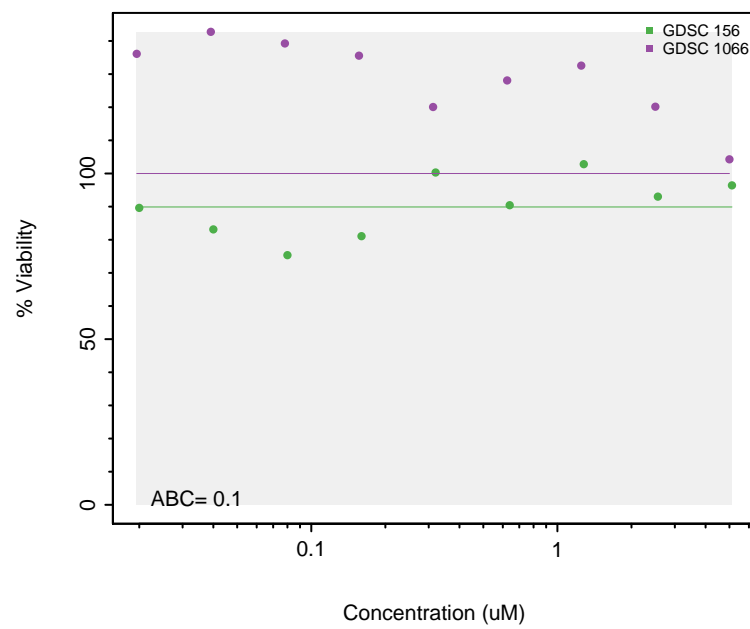

AZD6482:SW900

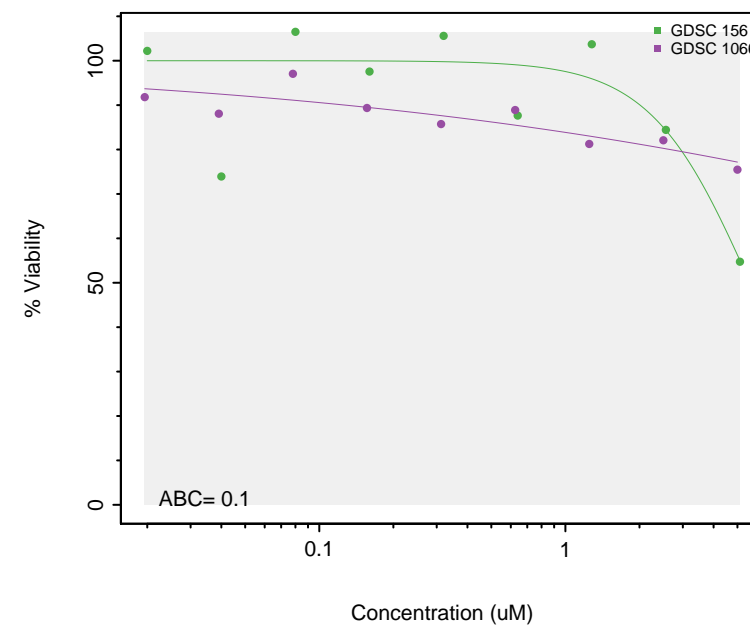

AZD6482:RO82-W-1

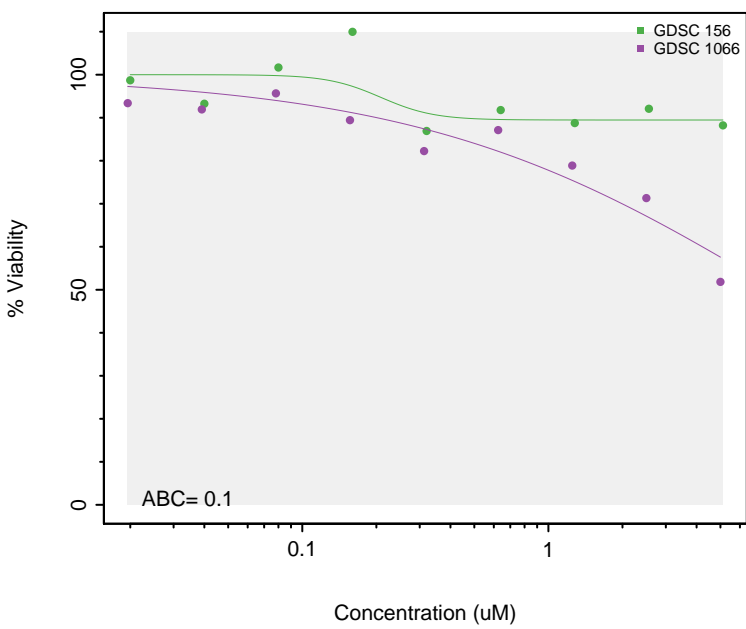

AZD6482:Panc 03.27

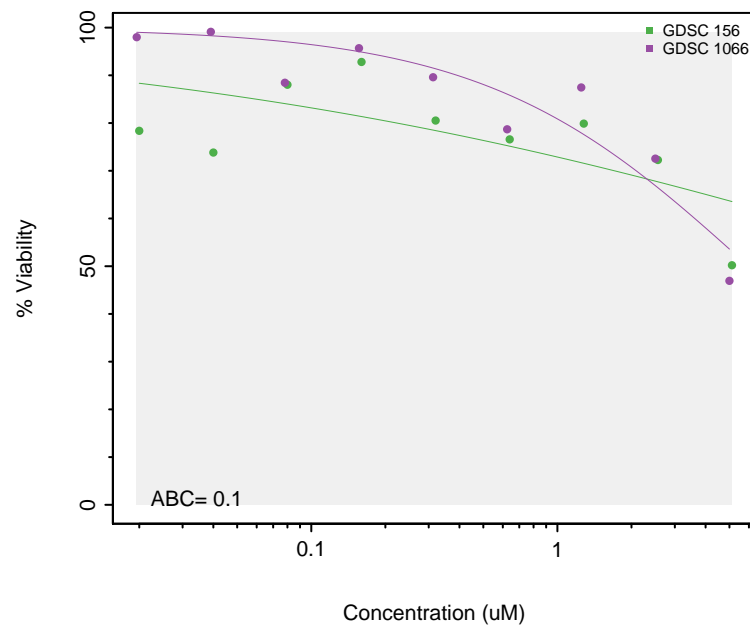

AZD6482:IST-SL2

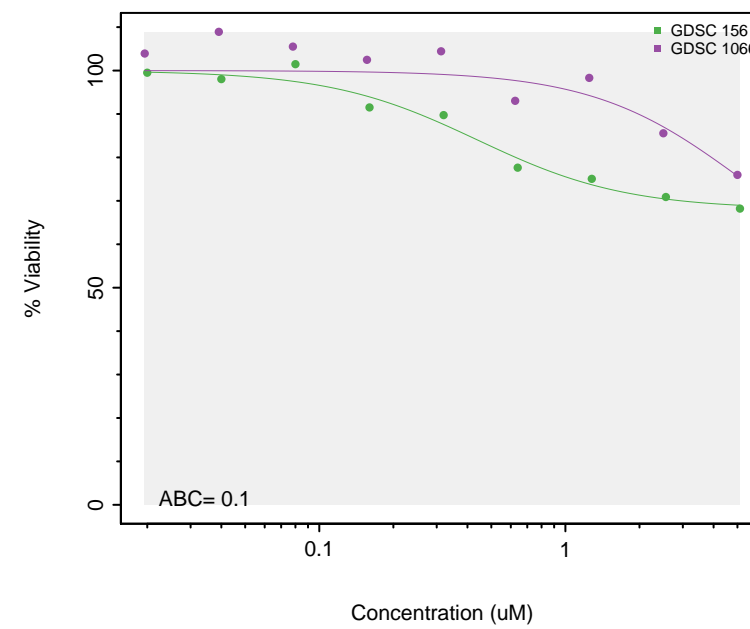

AZD6482:G-401

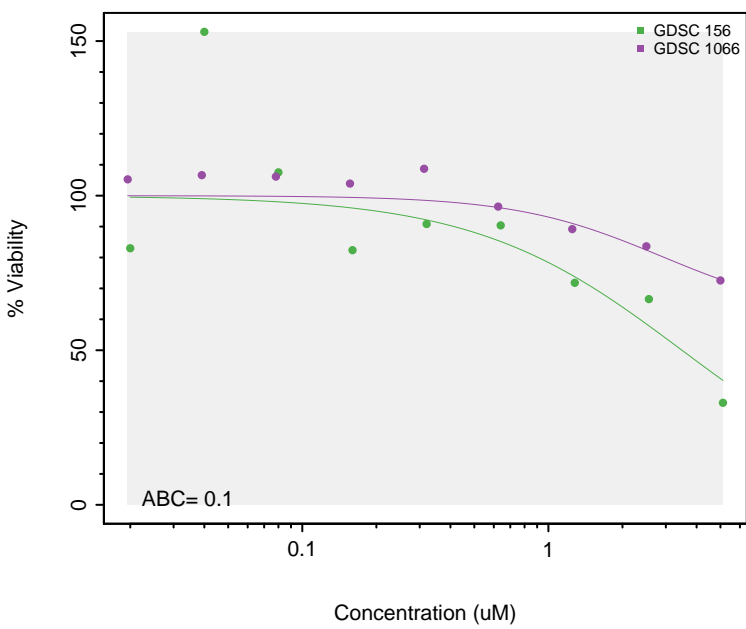

AZD6482:EGI-1

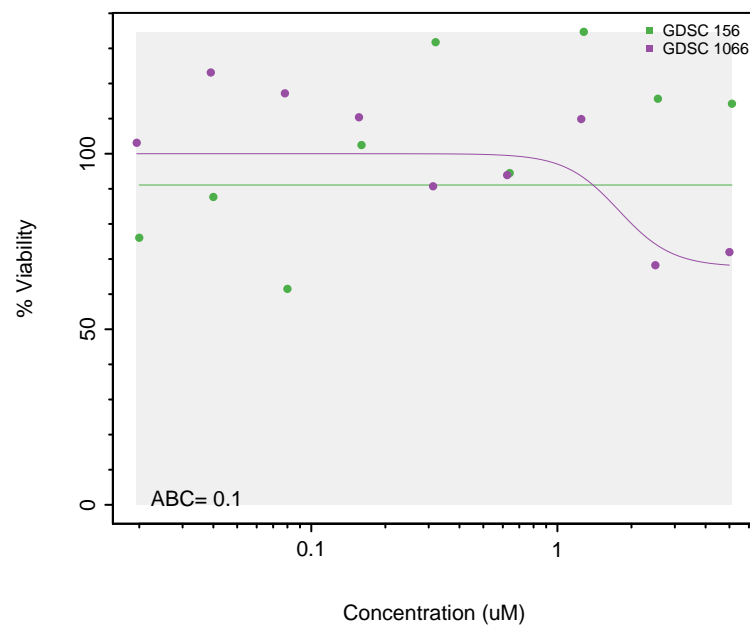

AZD6482:HCC70

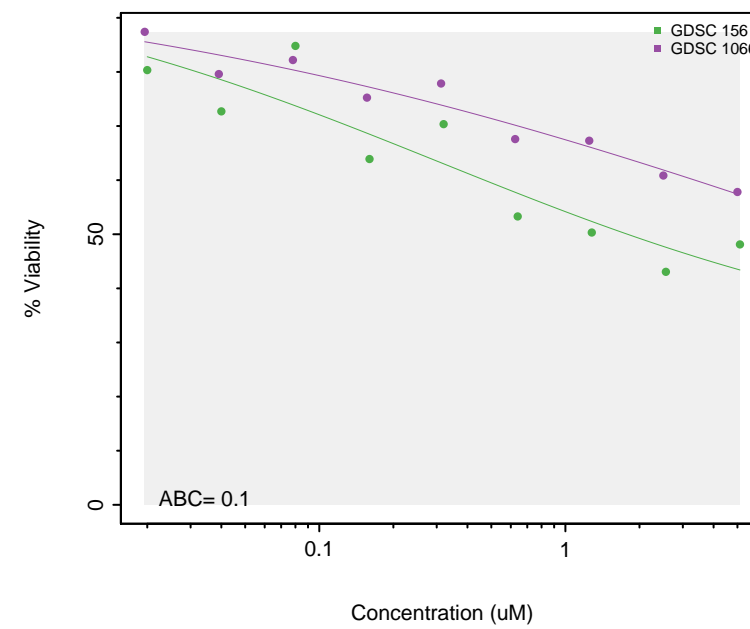

AZD6482:D-502MG

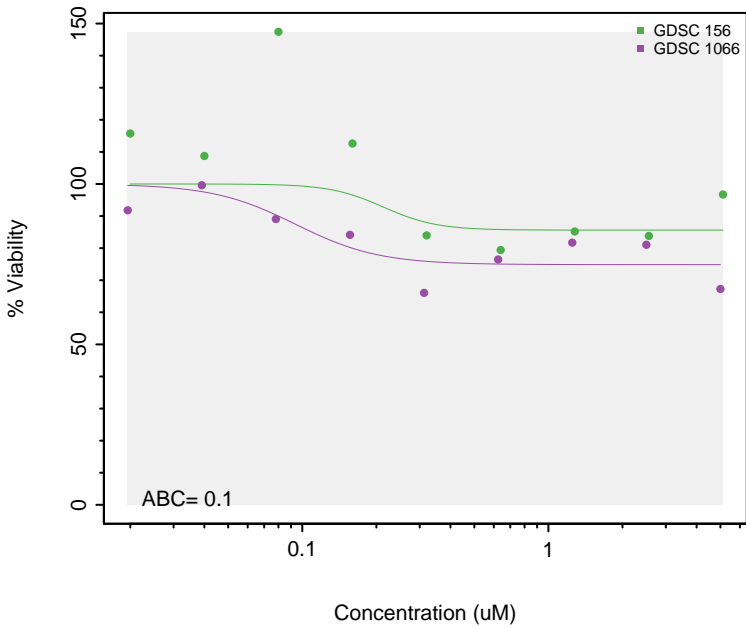

AZD6482:ESS-1

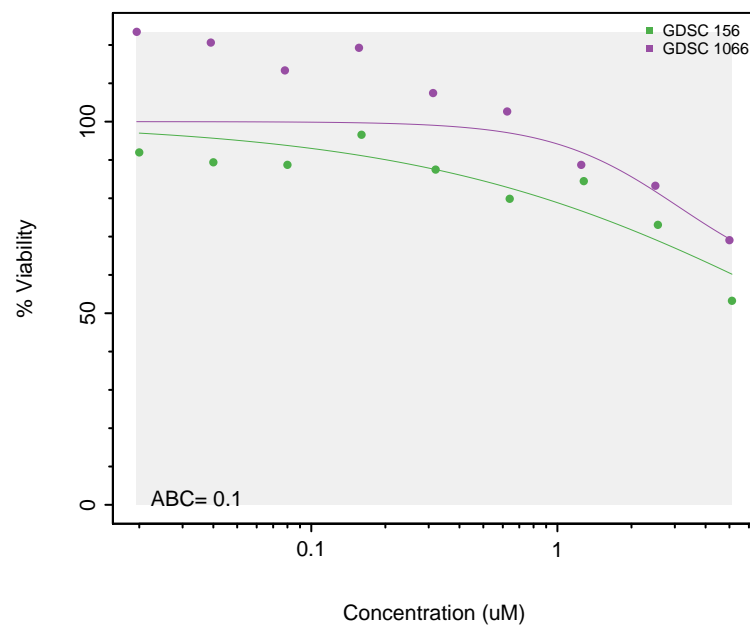

AZD6482:SNG-M

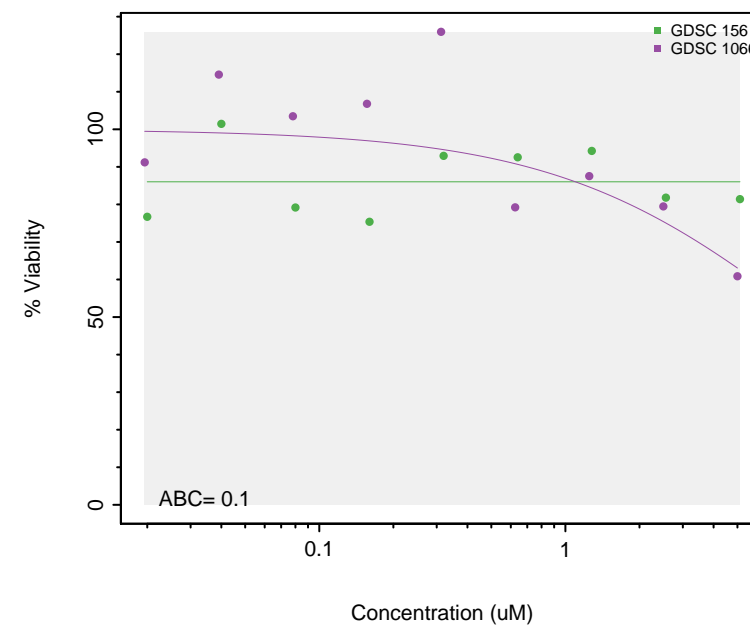

AZD6482:OAW-42

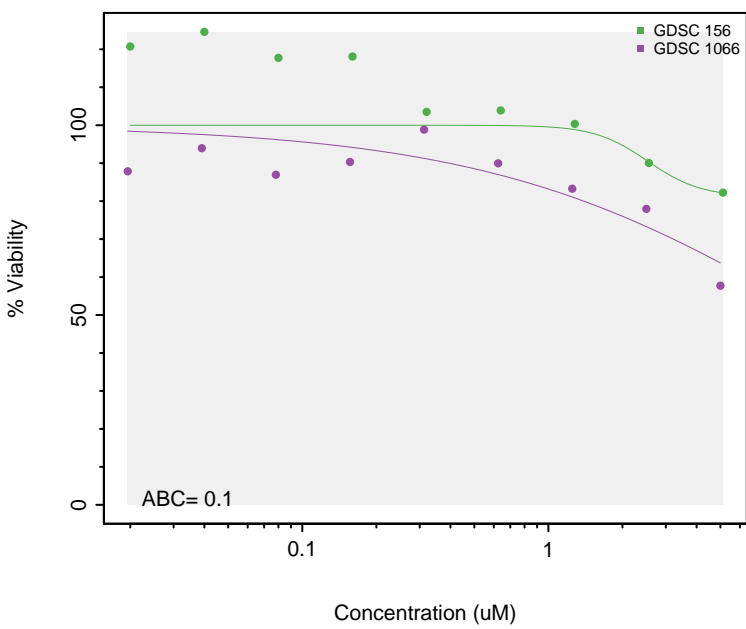

AZD6482:D-247MG

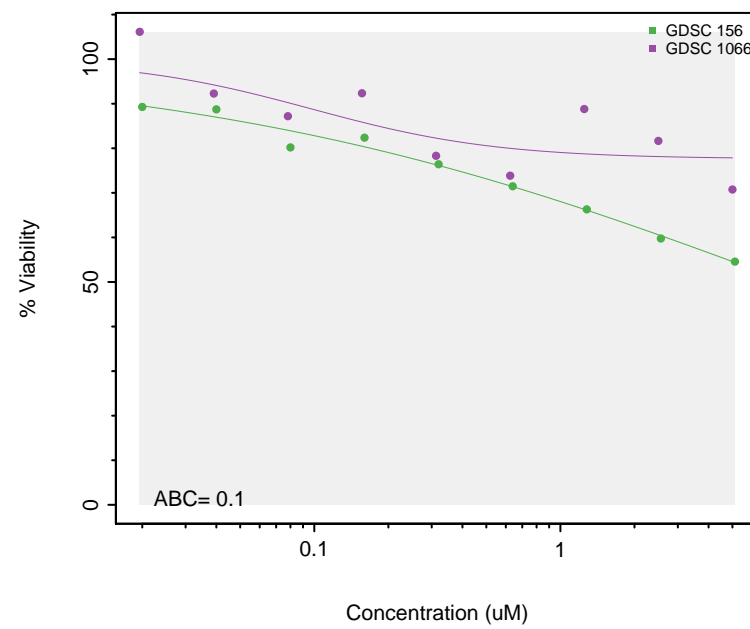

AZD6482:NB7

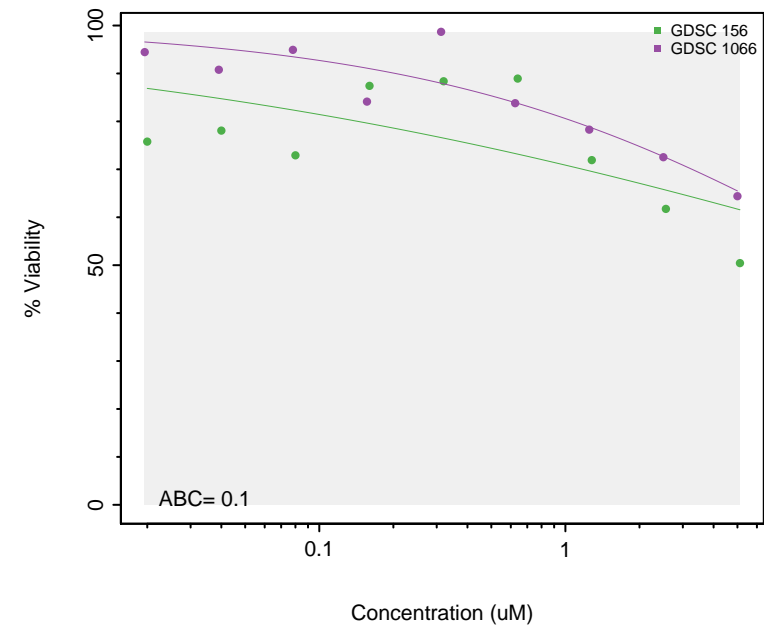

AZD6482:CAL-12T

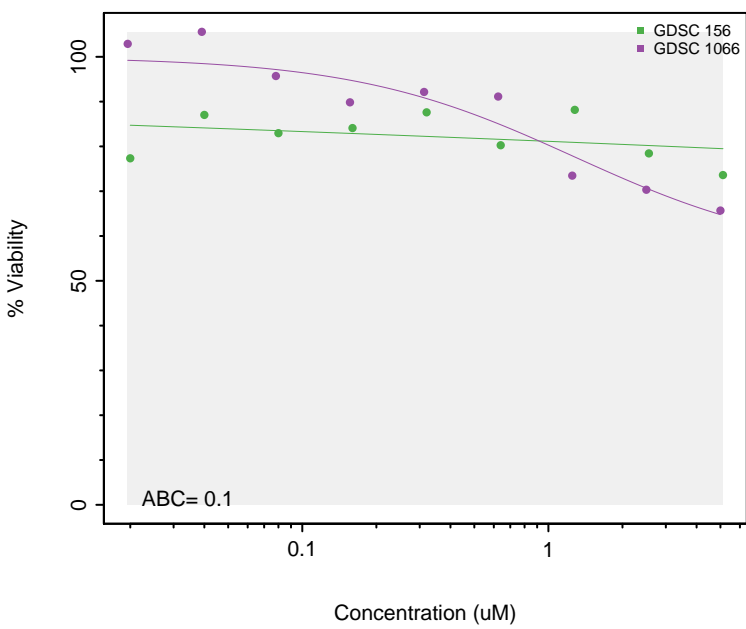

AZD6482:SK-PN-DW

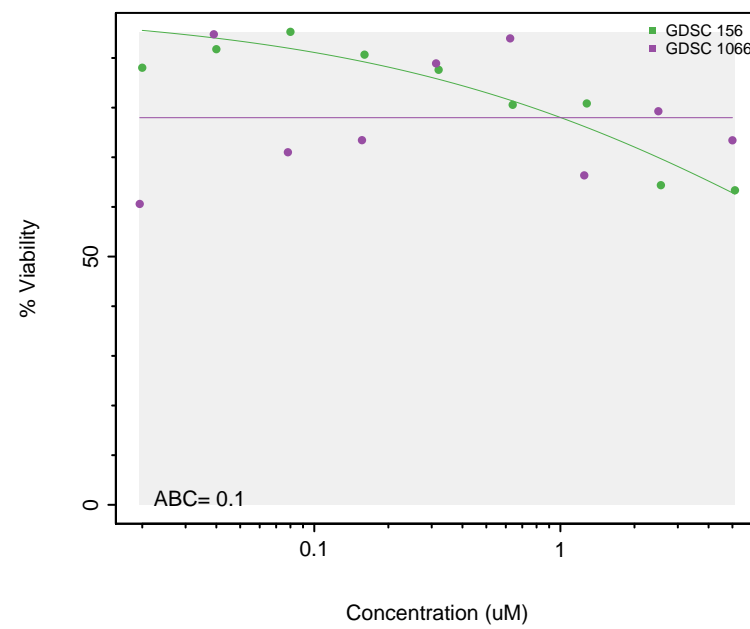

AZD6482:NCI-H2405

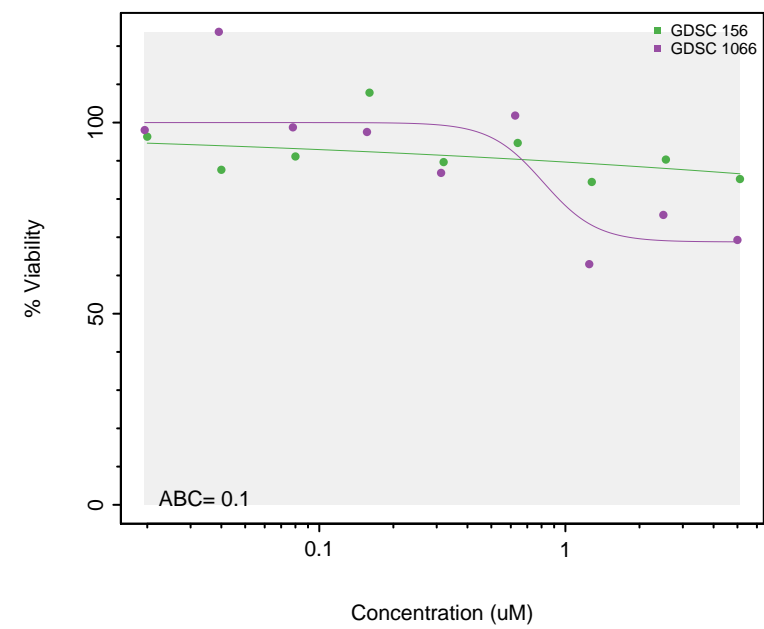

AZD6482:MPP-89

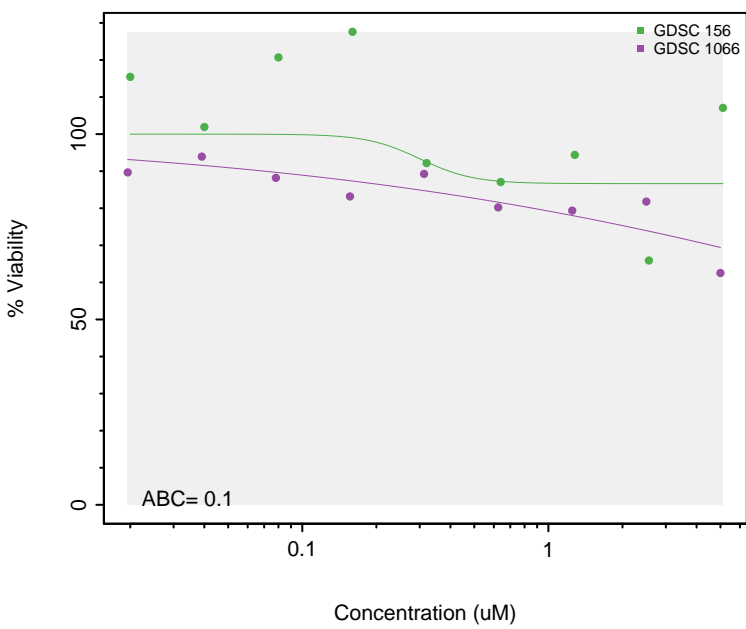

AZD6482:CTB-1

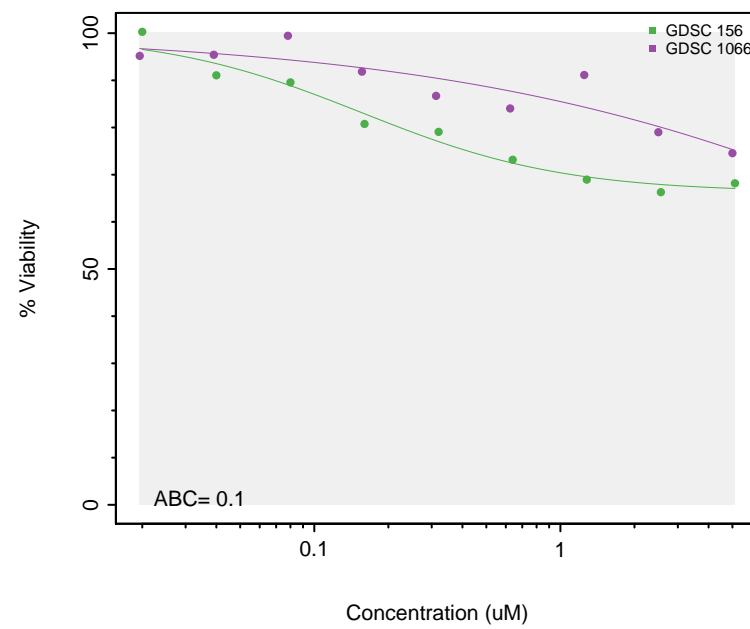

AZD6482:SiHa

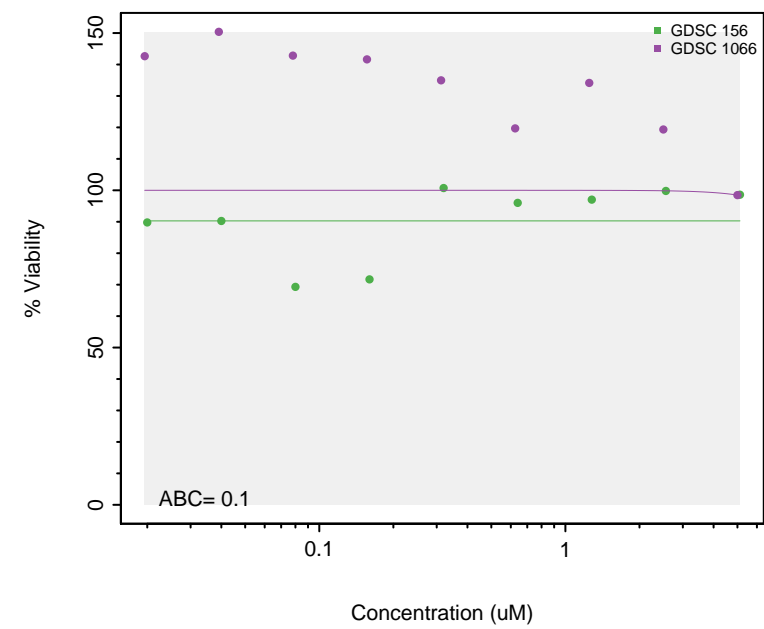

AZD6482:CAKI-1

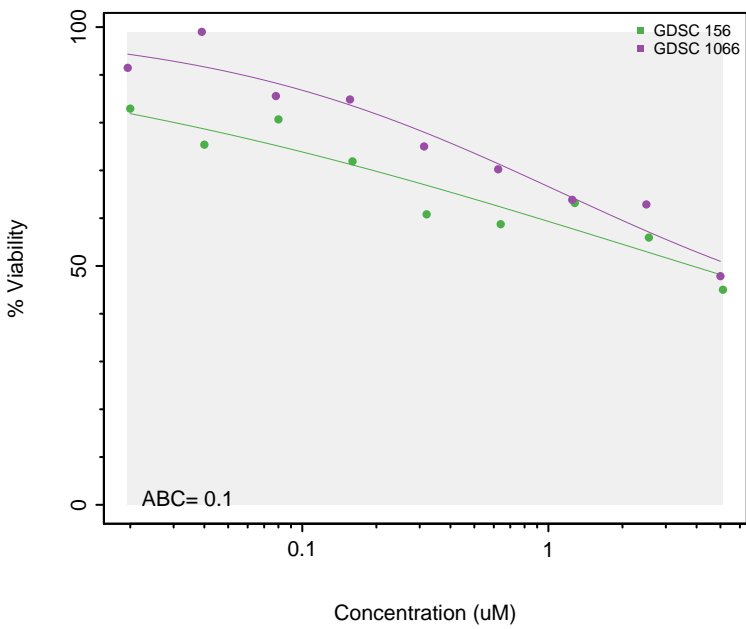

AZD6482:CHP-126

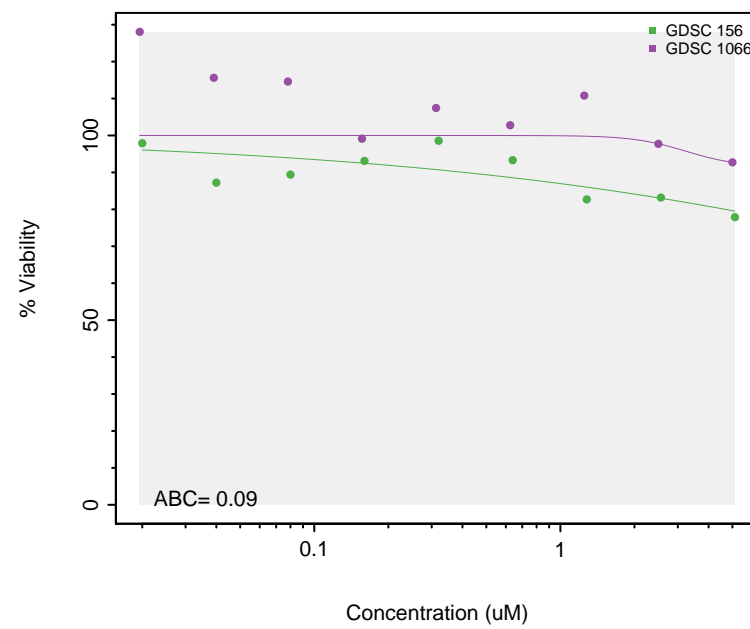

AZD6482:LB1047-RCC

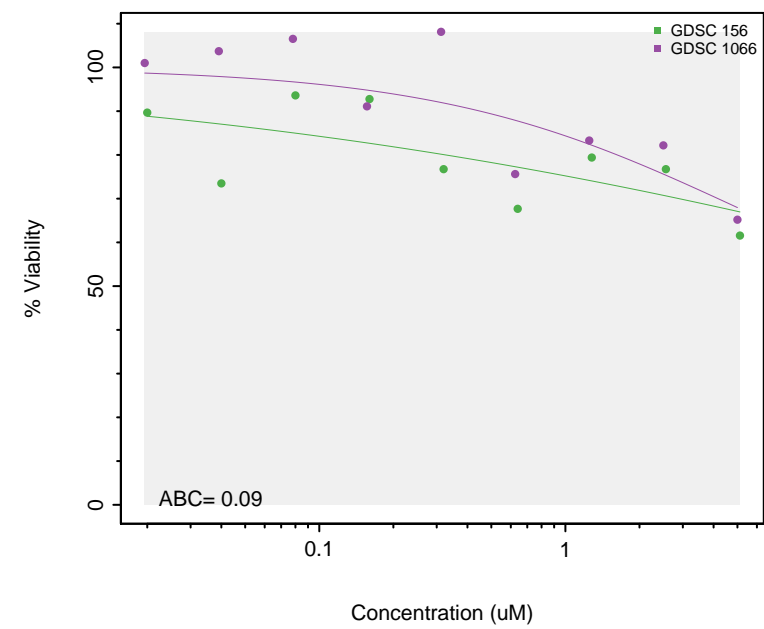

AZD6482:MG-63

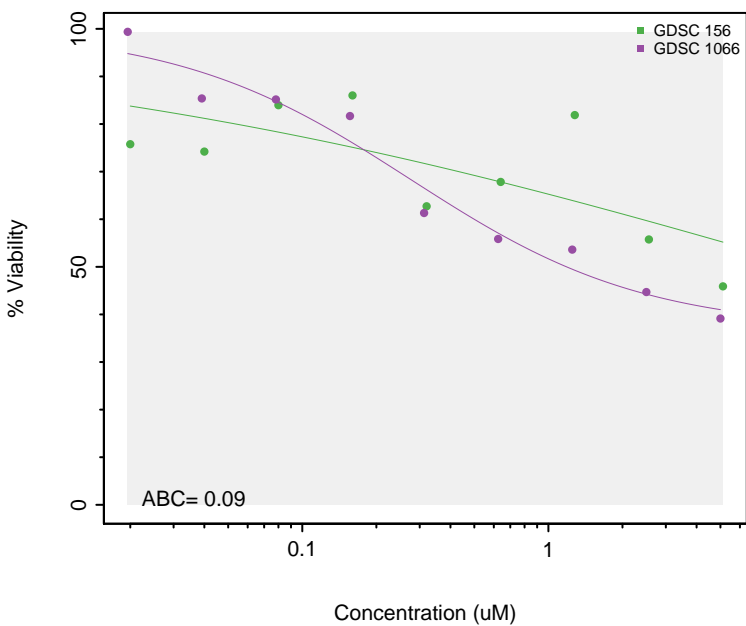

AZD6482:AM-38

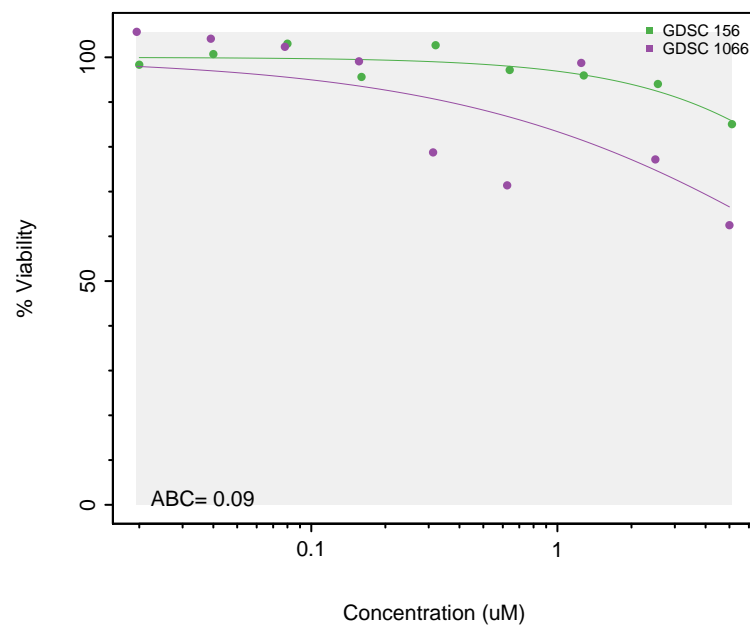

AZD6482:NCI-H1993

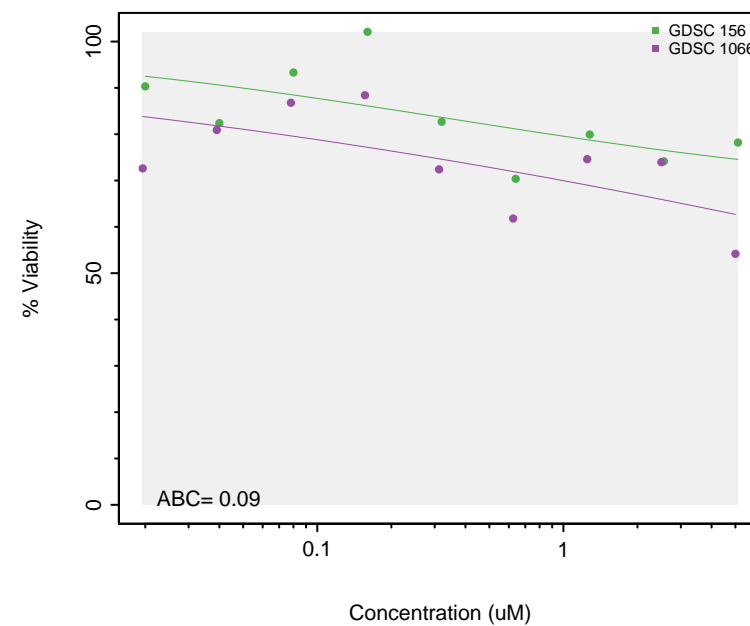

AZD6482:CAPAN-1

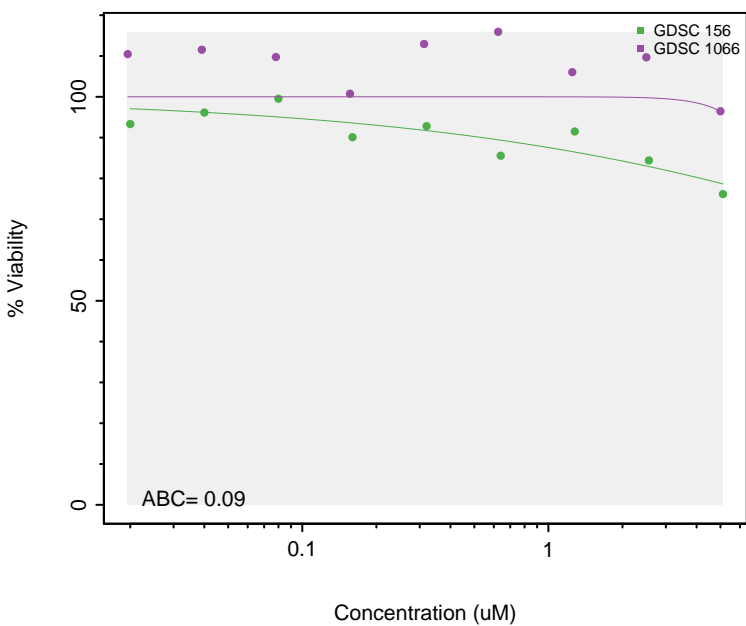

AZD6482:GOTO

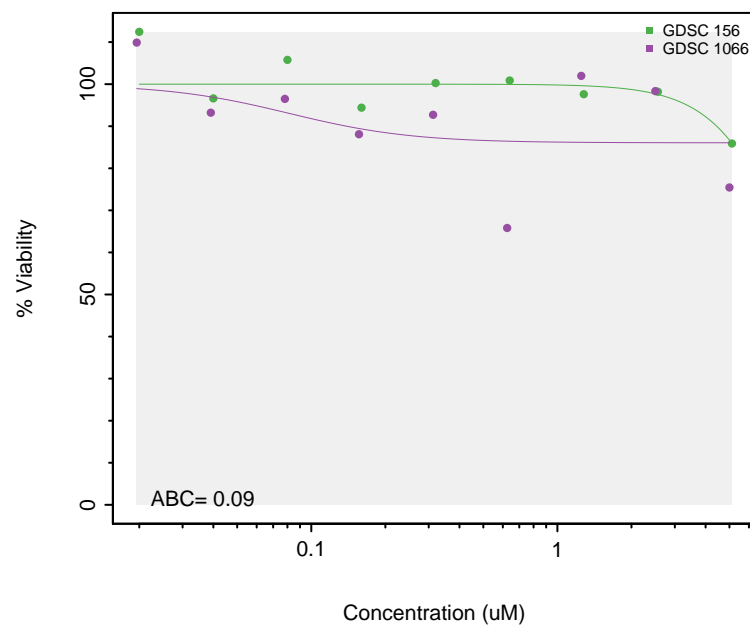

AZD6482:RPMI-6666

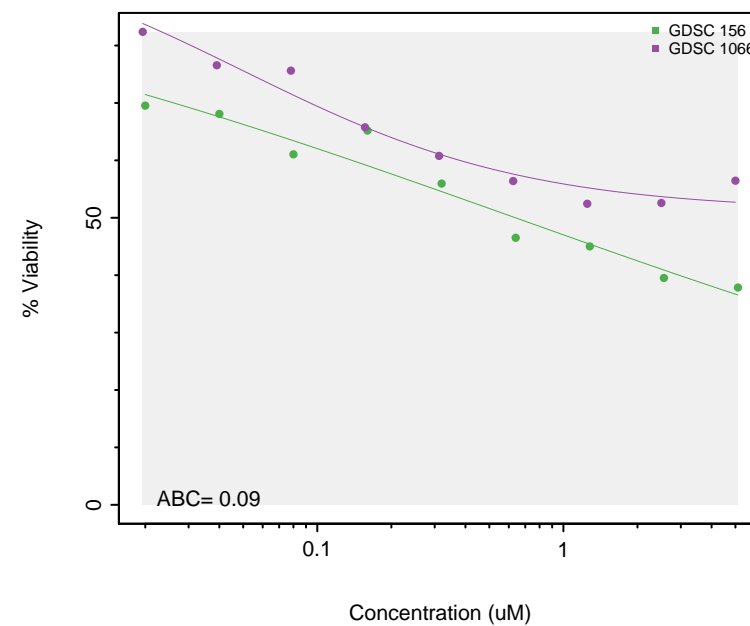

AZD6482:EW-18

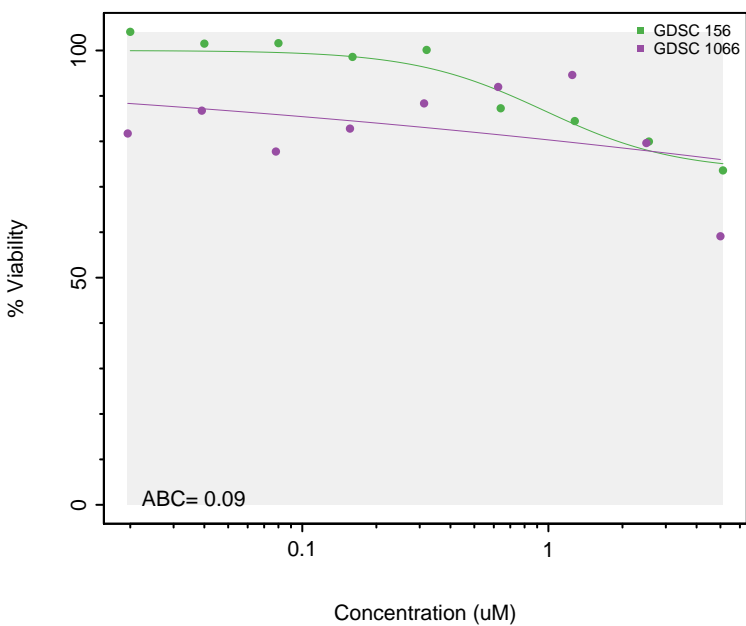

AZD6482:KLE

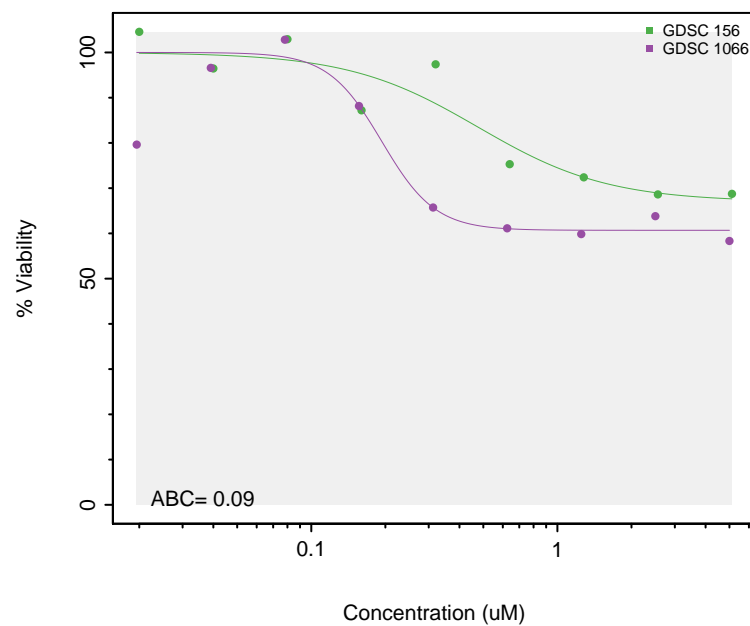

AZD6482:LU-165

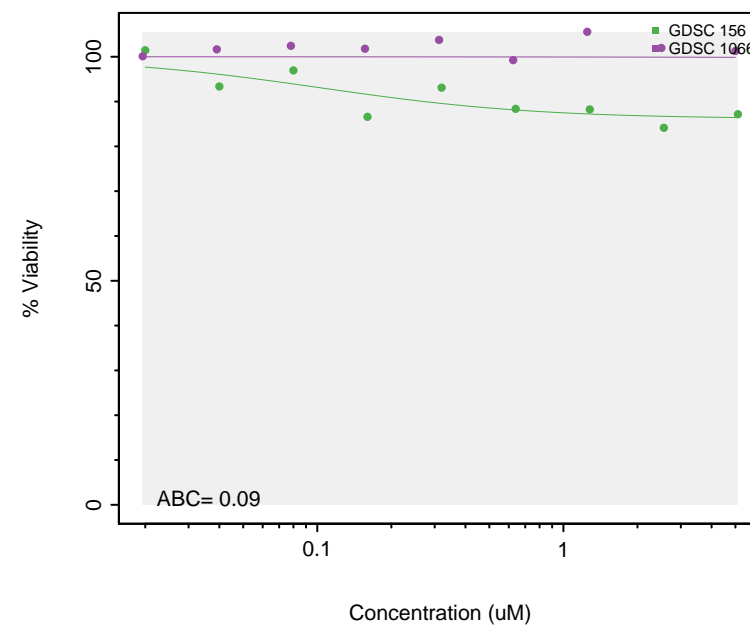

AZD6482:T84

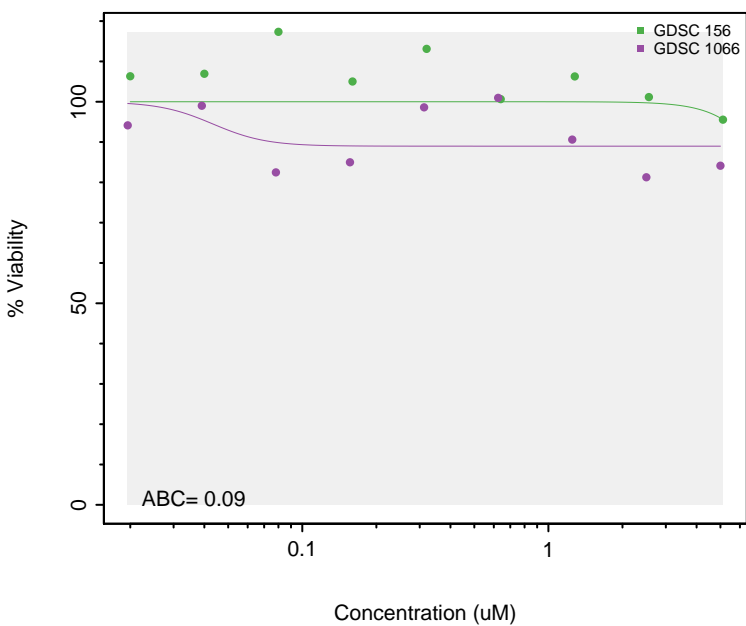

AZD6482:NCI-H2228

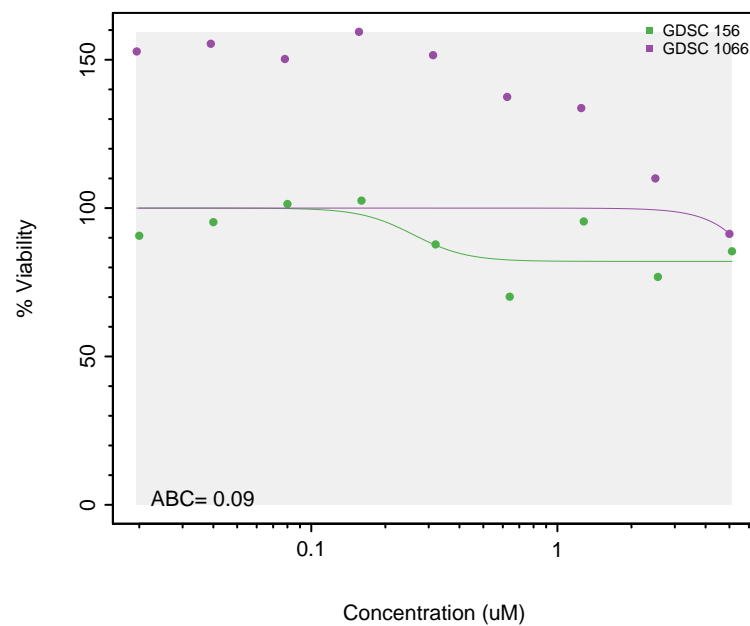

AZD6482:HTC-C3

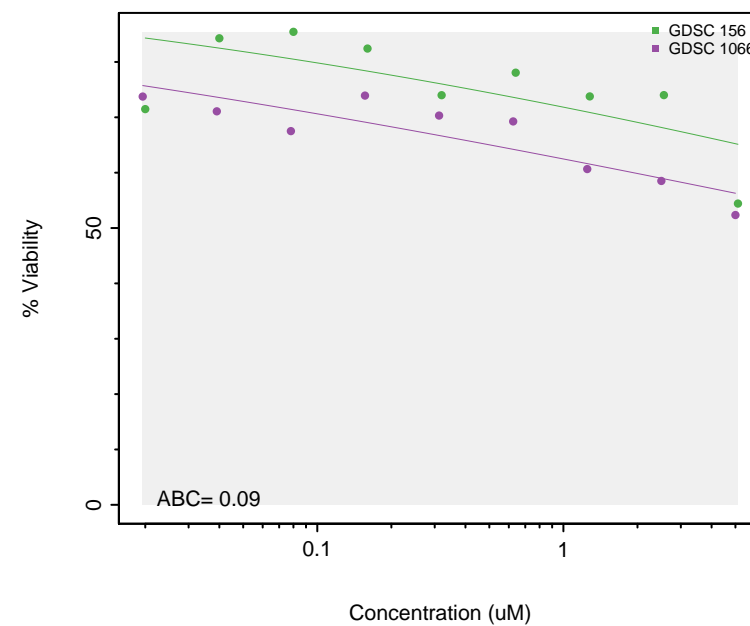



AZD6482:D-336MG

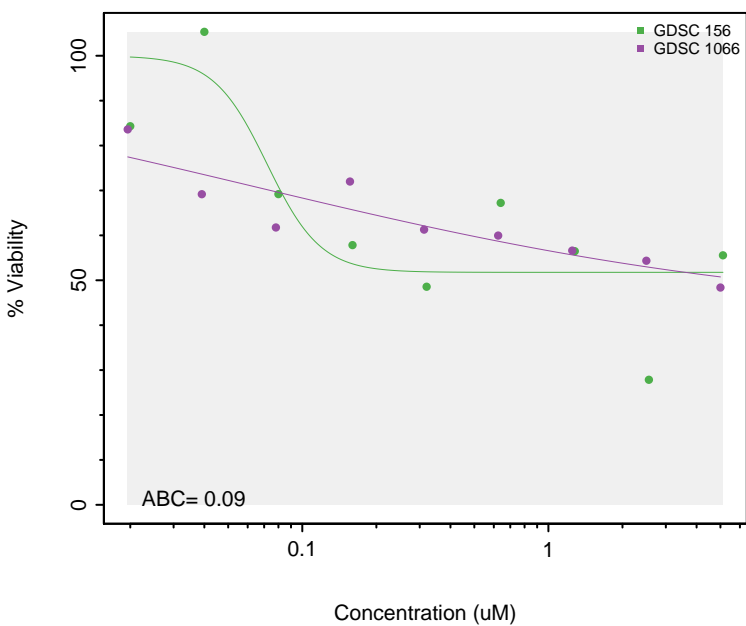

AZD6482:SK-MEL-2

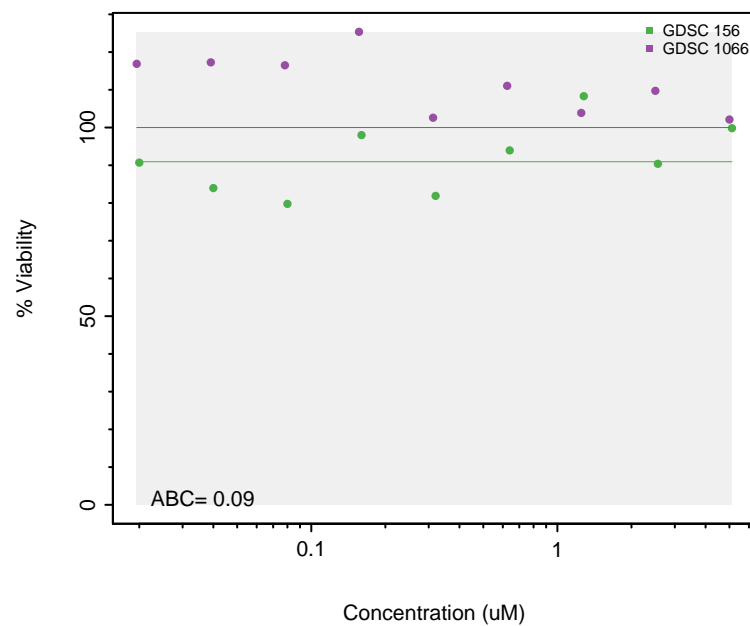

AZD6482:KYSE-510

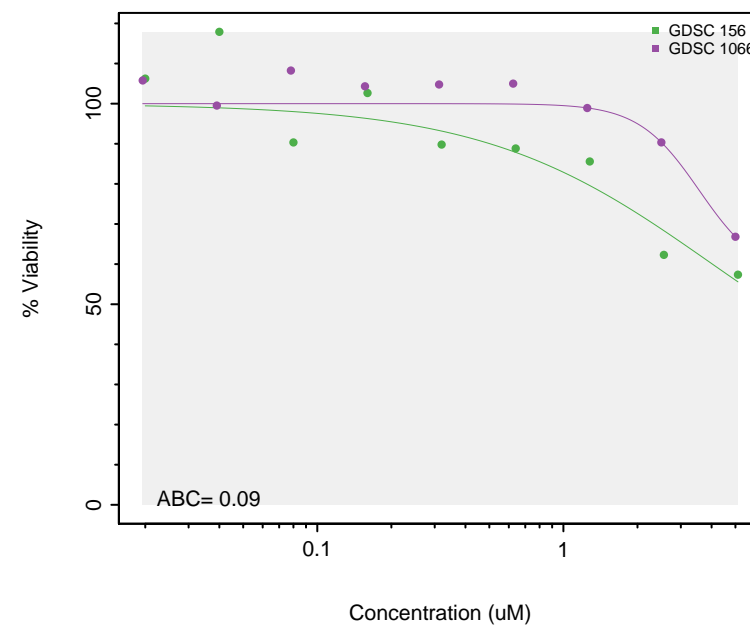

AZD6482:LNCaP-Clone-FGC

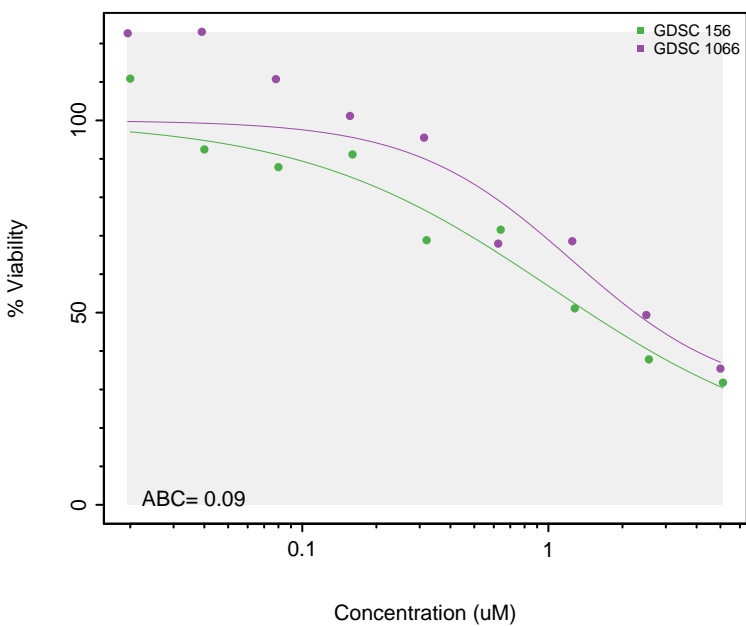

AZD6482:L-363

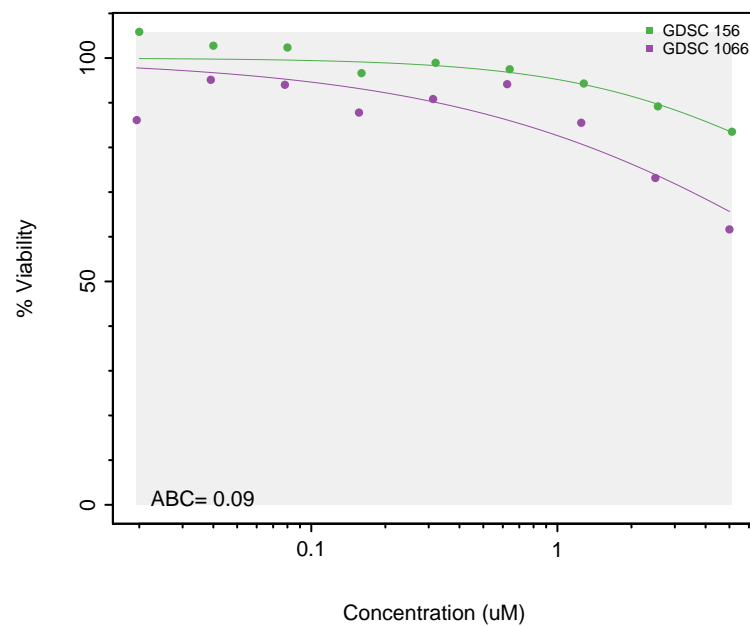

AZD6482:LB2518-MEL

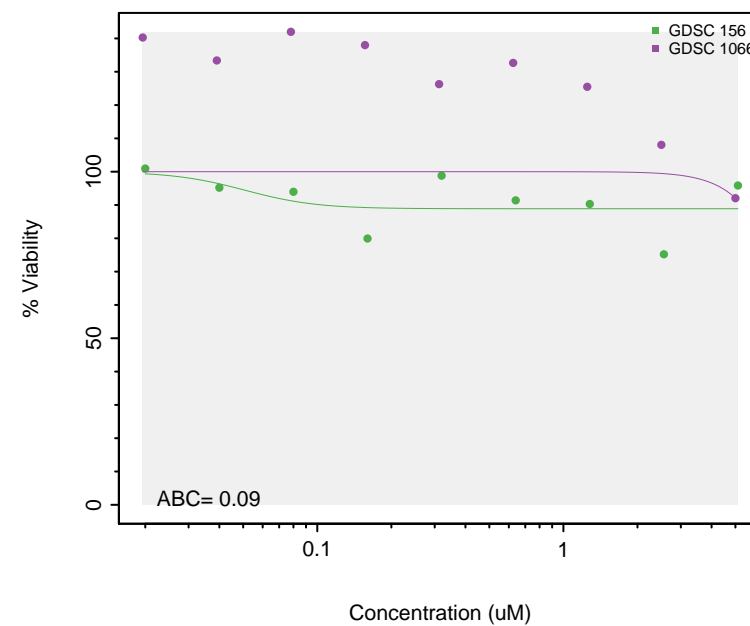

AZD6482:Detroit562

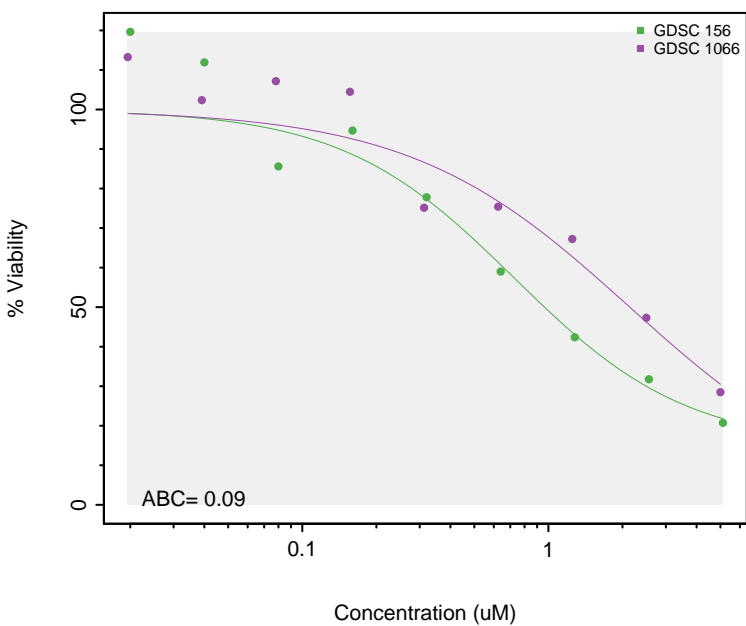

AZD6482:RPMI-8402

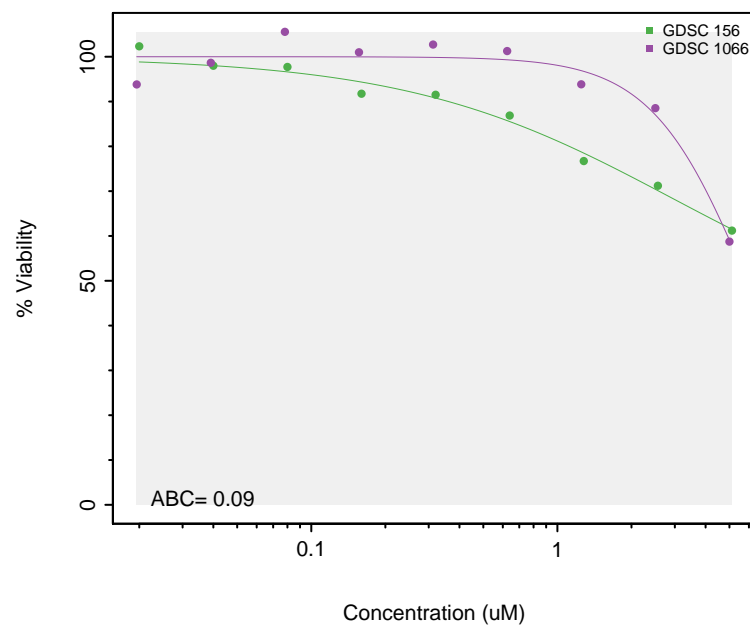

AZD6482:COLO-684

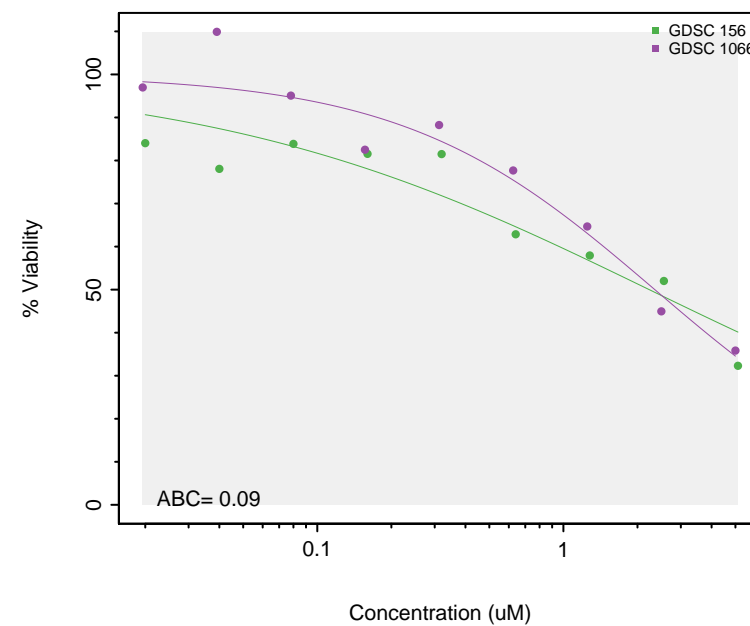

AZD6482:A4-Fuk

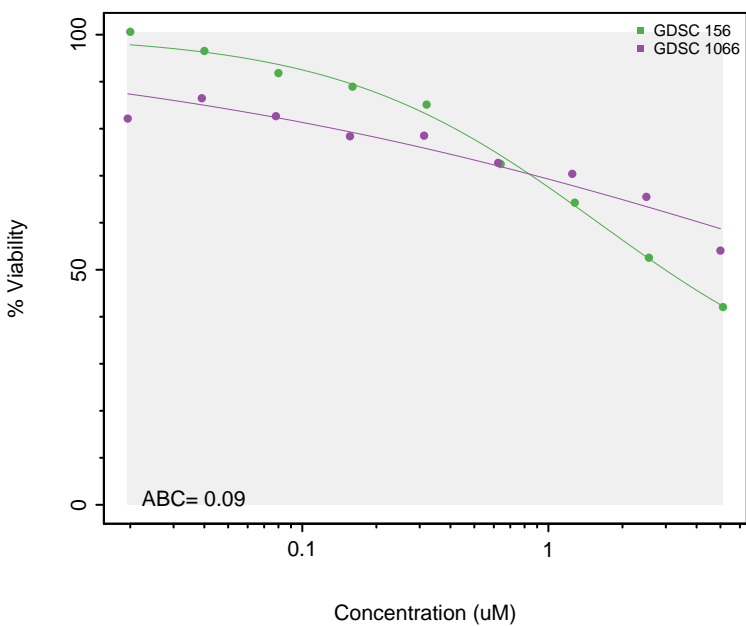

AZD6482:SW1463

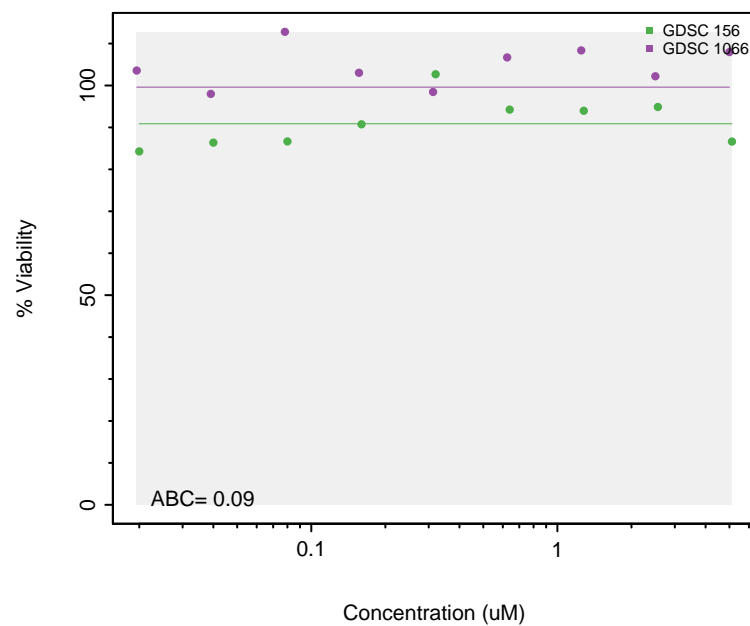

AZD6482:HD-MY-Z

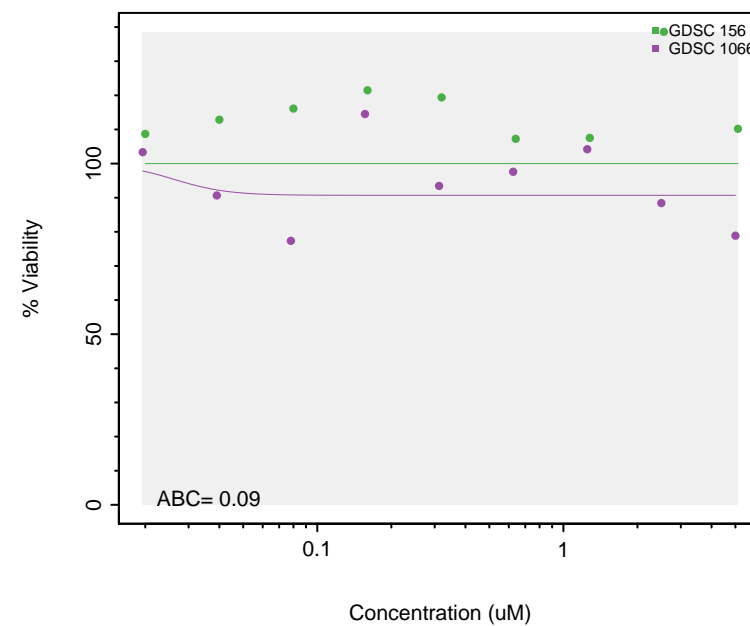

AZD6482:SUP-T1

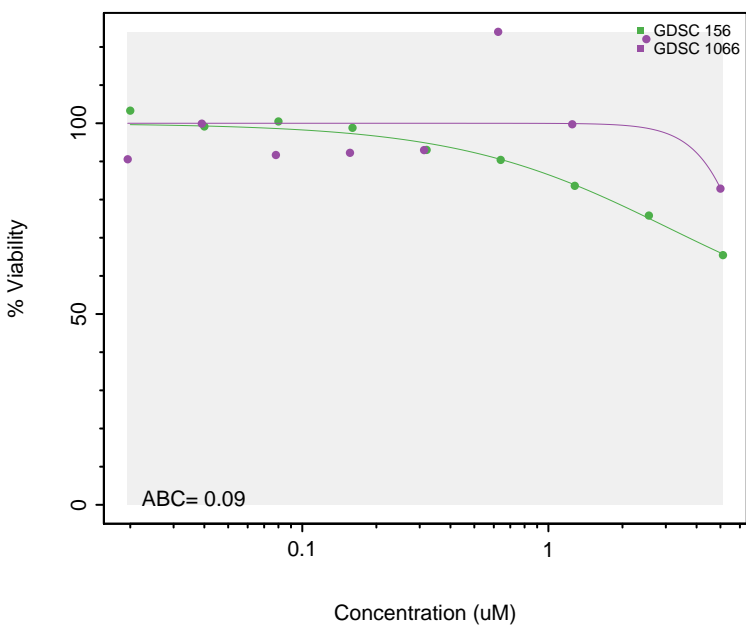

AZD6482:NCI-H1792

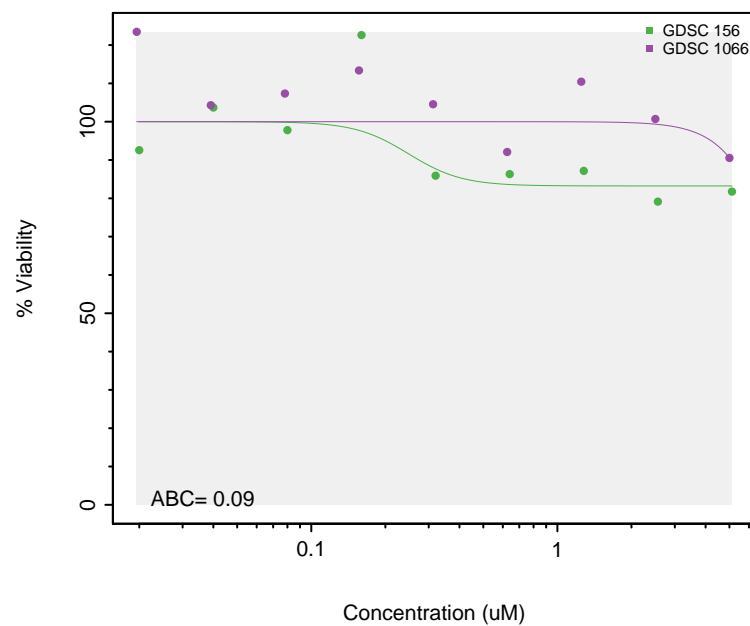

AZD6482:OCUB-M

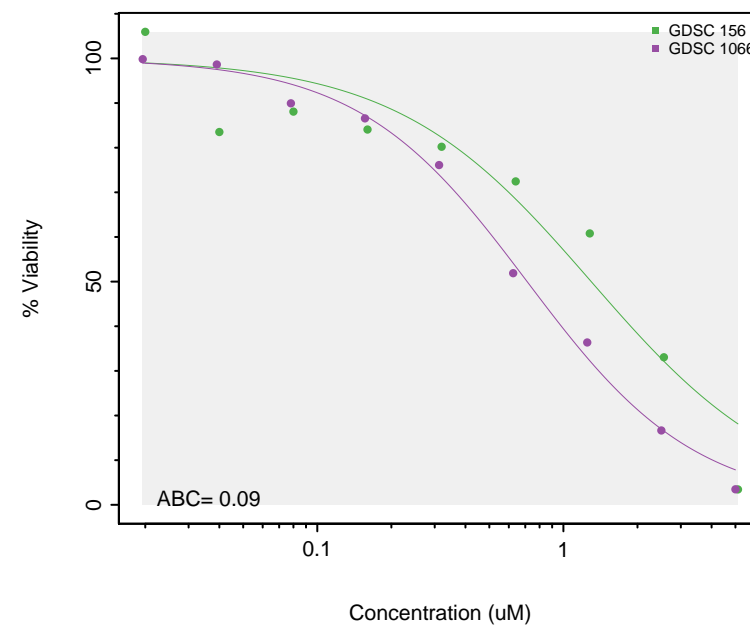

AZD6482:JiyoyeP-2003

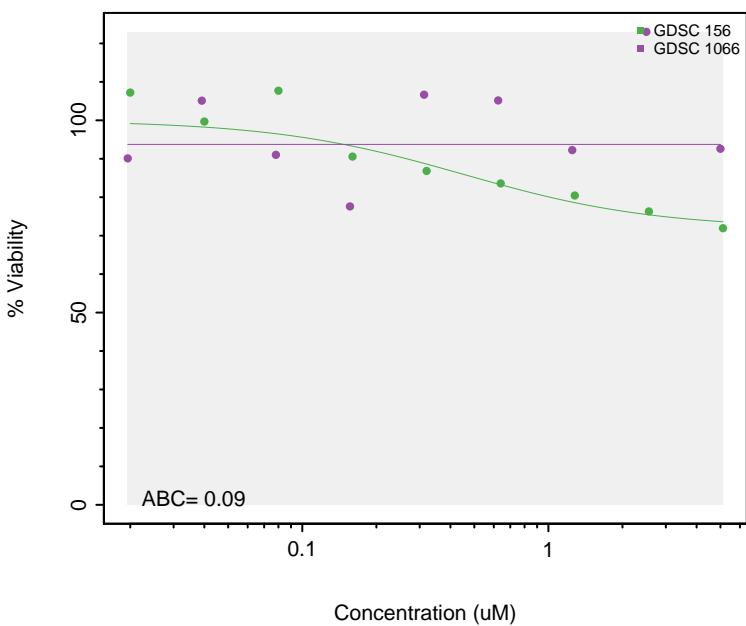

AZD6482:BF7C-909

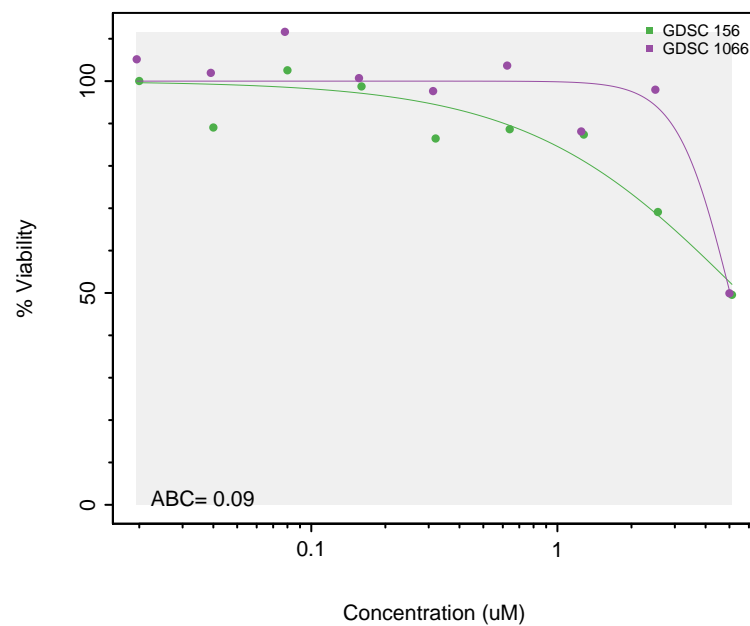

AZD6482:FTC-133

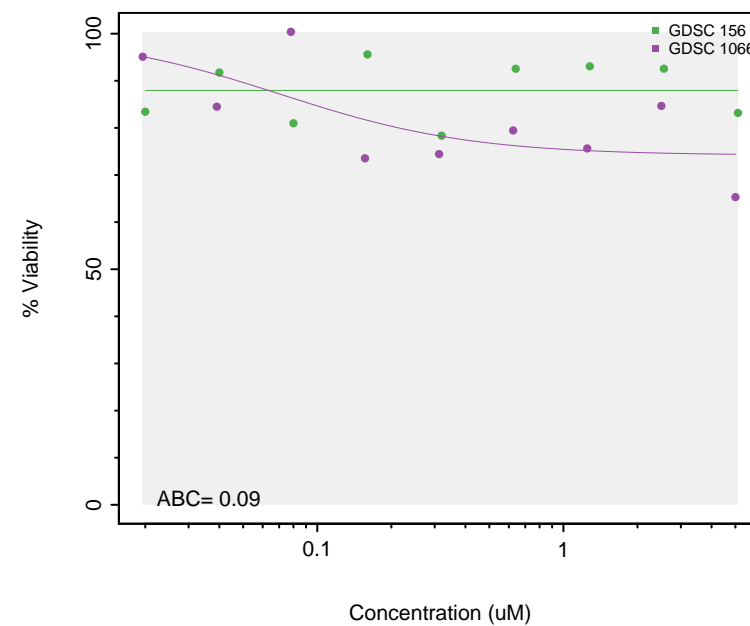

AZD6482:EW-3

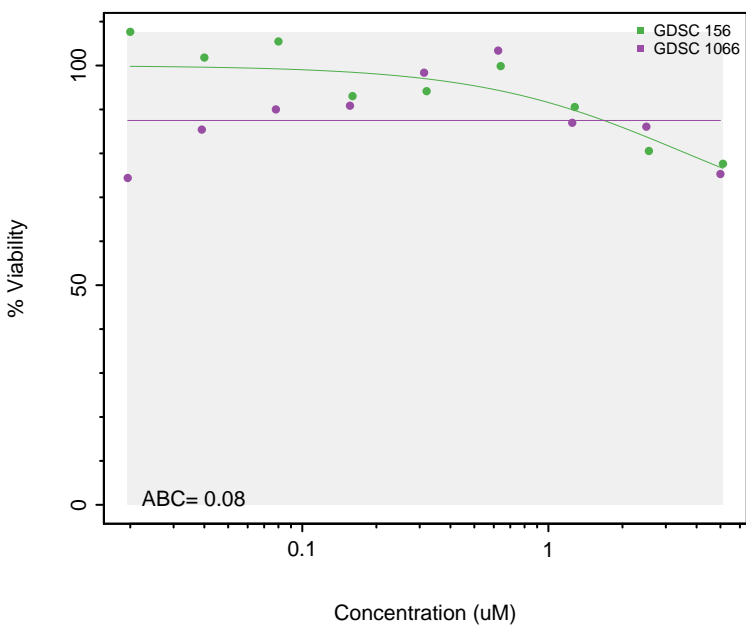

AZD6482:IMR-5

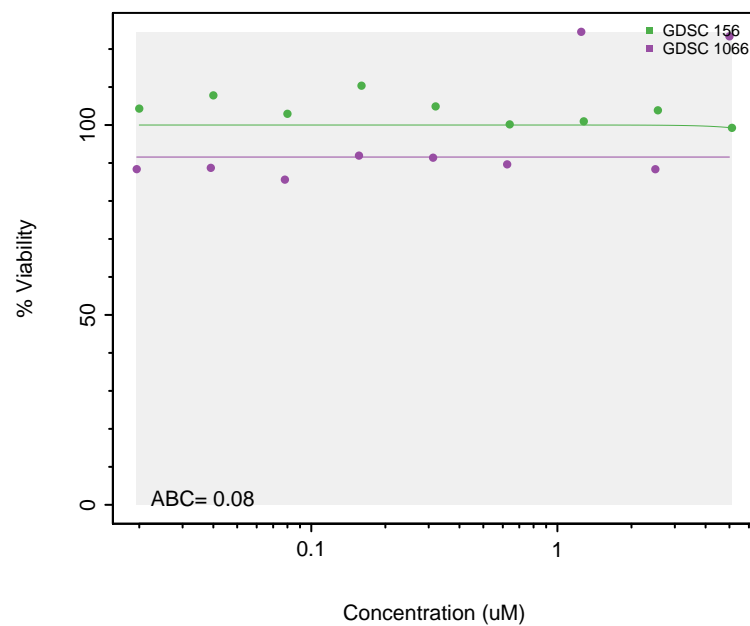

AZD6482:TE-10

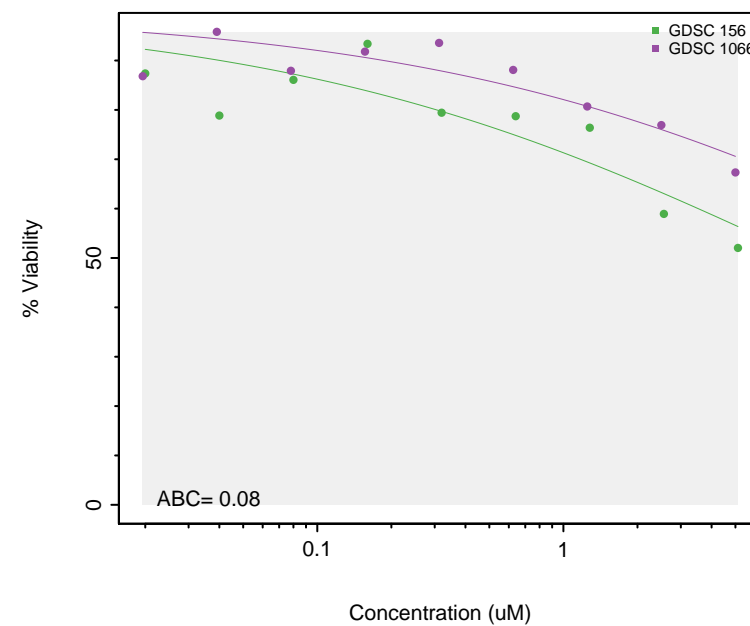

AZD6482:LS-1034

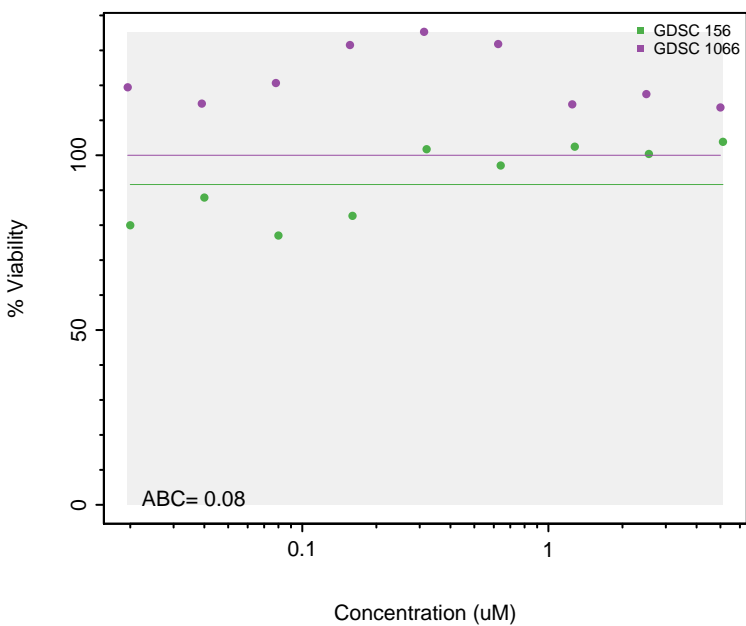

AZD6482:LC-2-ad

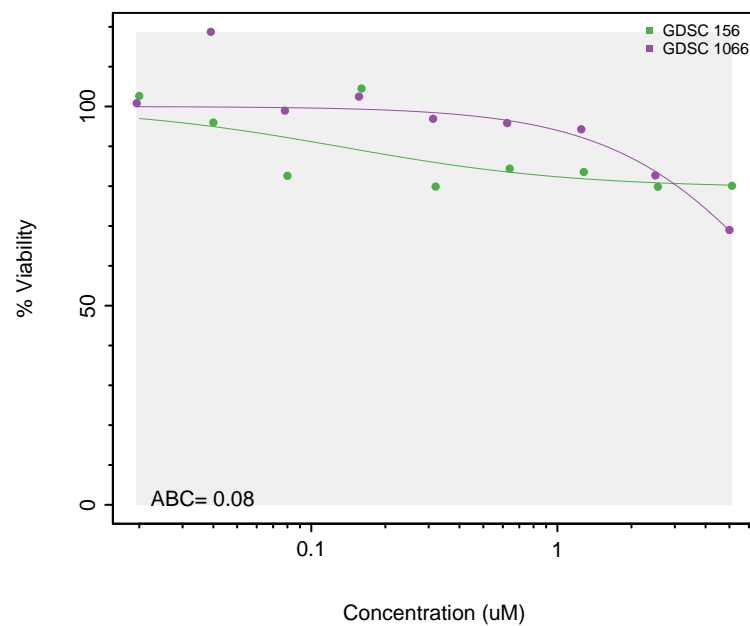

AZD6482:T98G

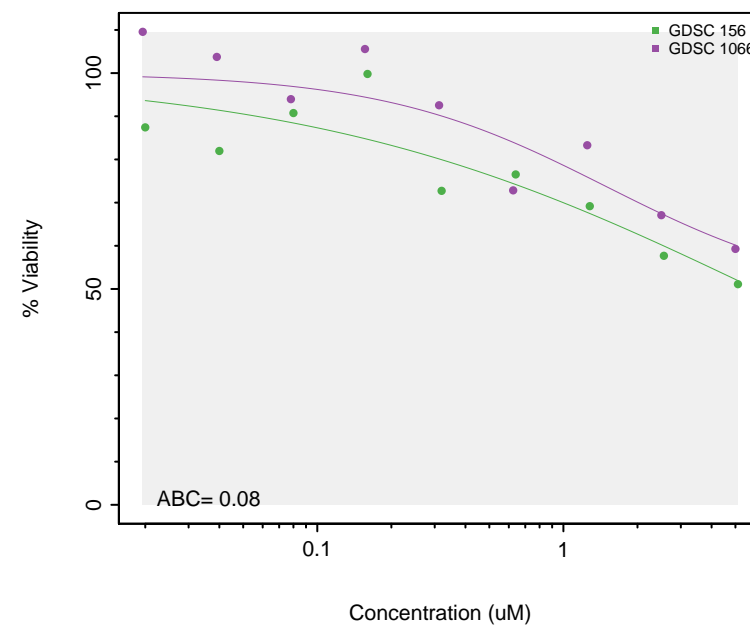

AZD6482:TE-8

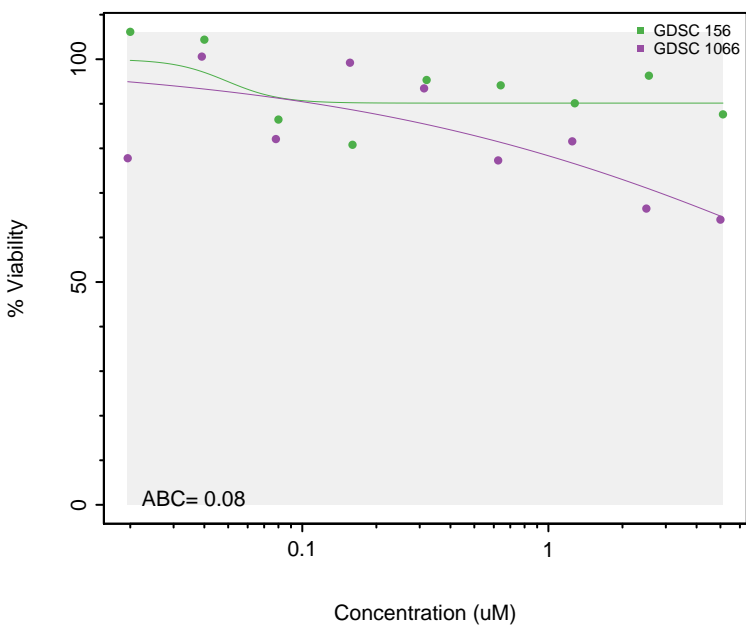

AZD6482:COLO-824

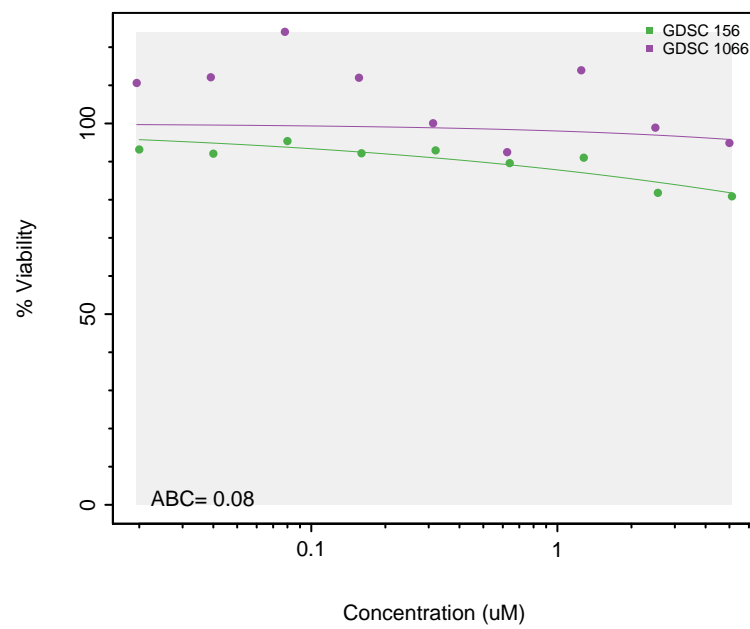

AZD6482:SW1573

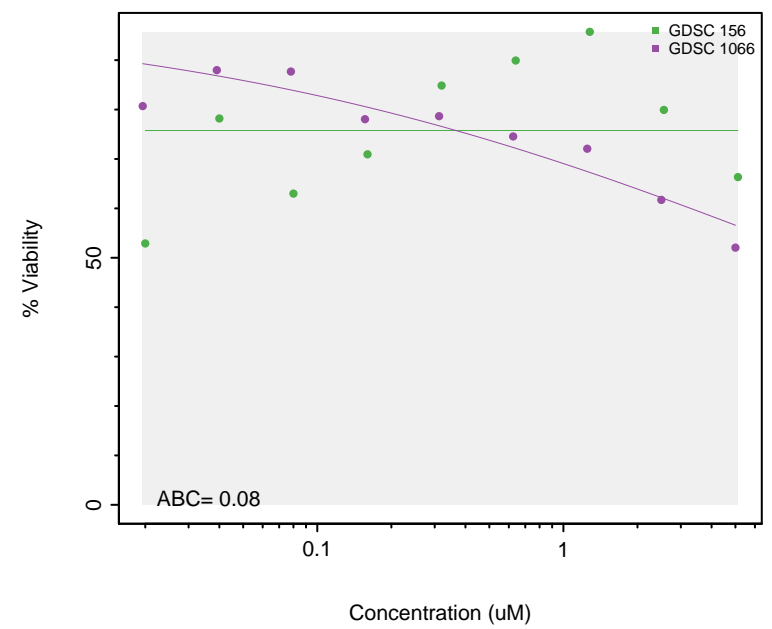

AZD6482:NB1

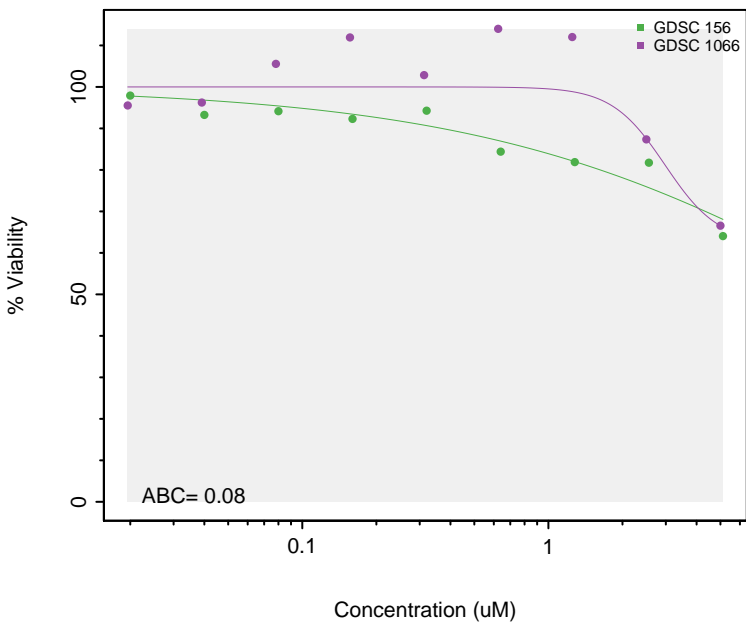

AZD6482:IM-9

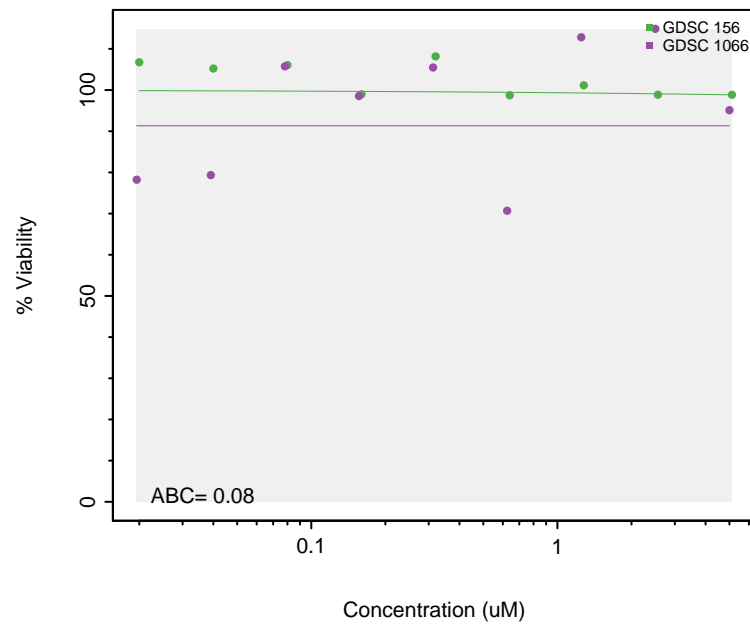

AZD6482:THP-1

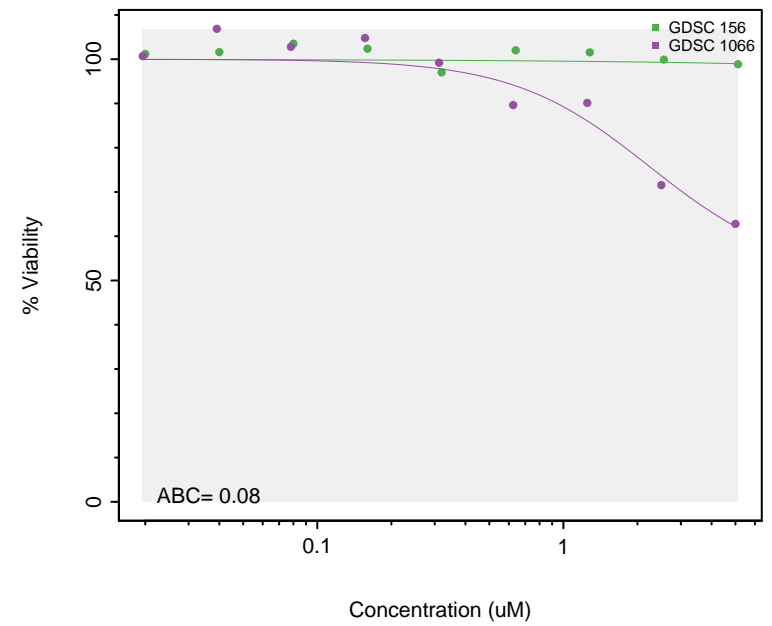

AZD6482:MFH-ino

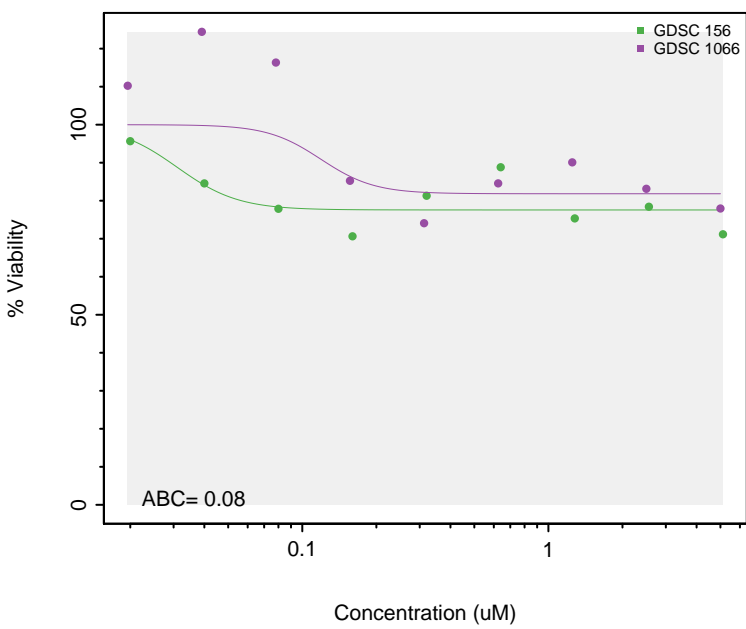

AZD6482:K5

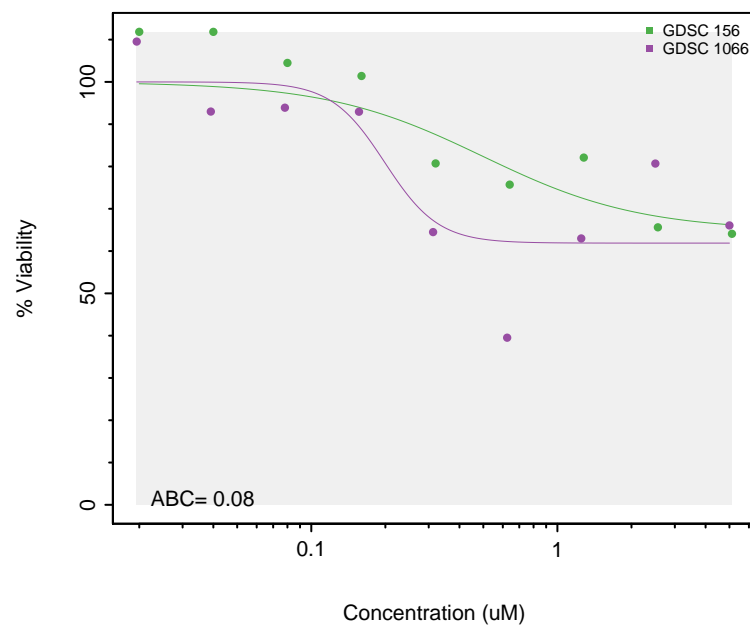

AZD6482:ES7

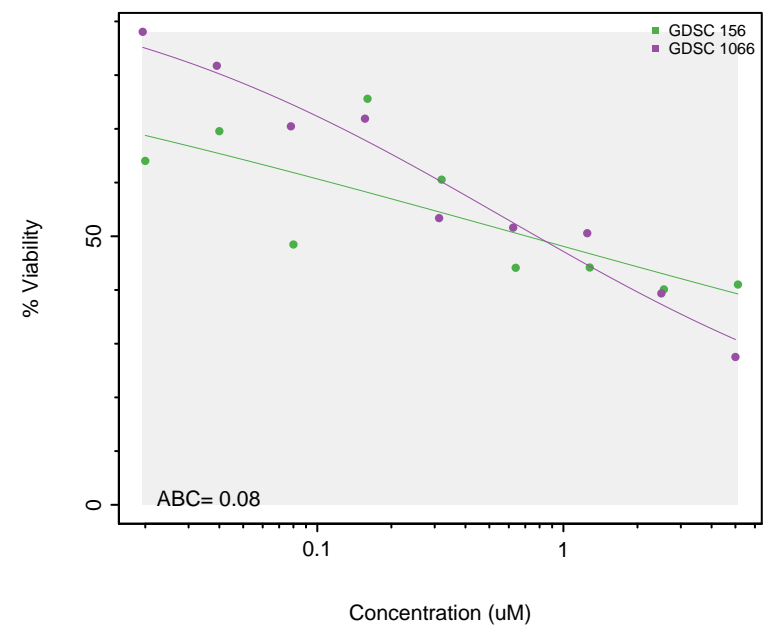

AZD6482:SW872

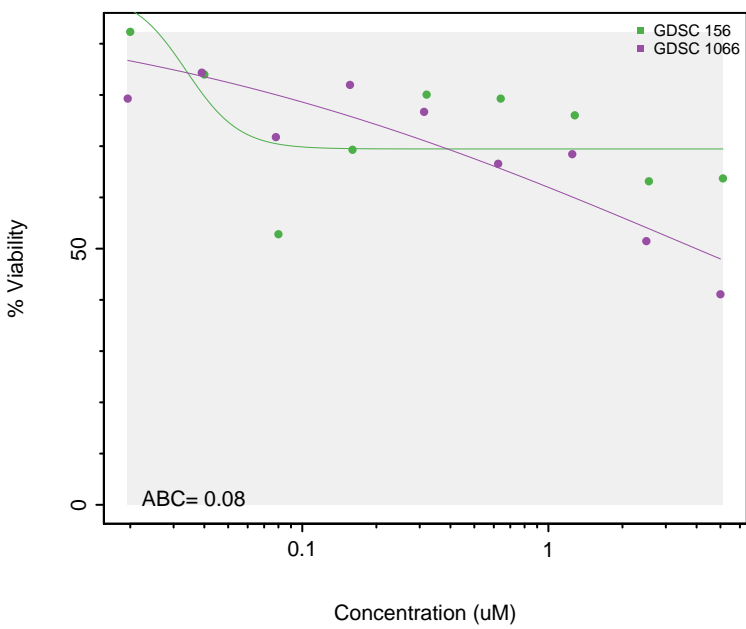

AZD6482:CP50-MEL-B

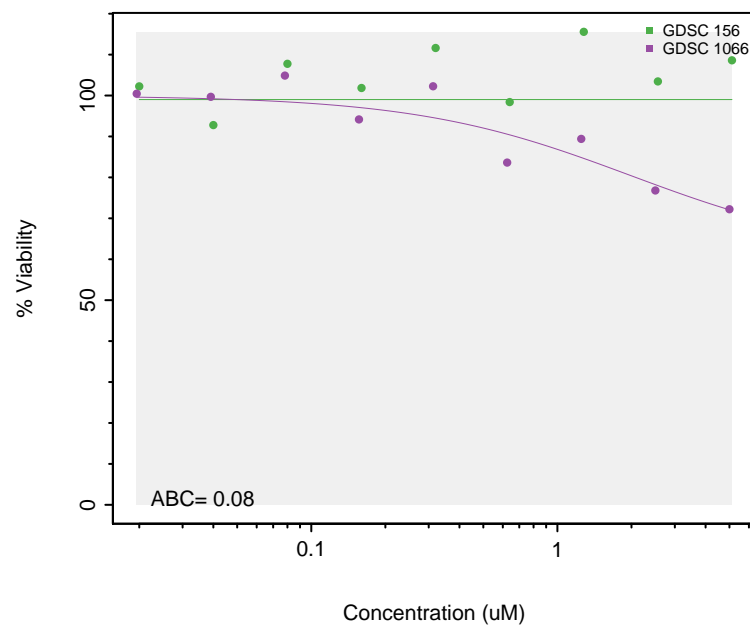

AZD6482:ES8

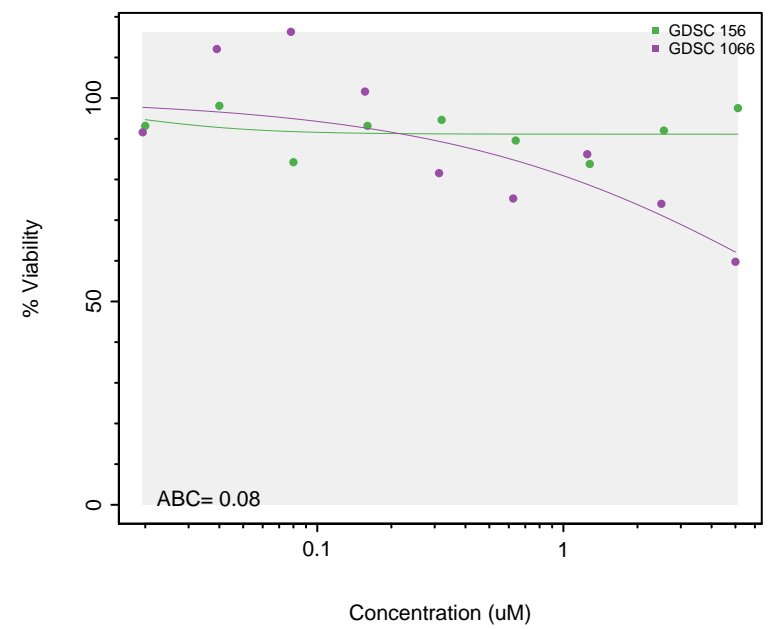

AZD6482:NCI-H524

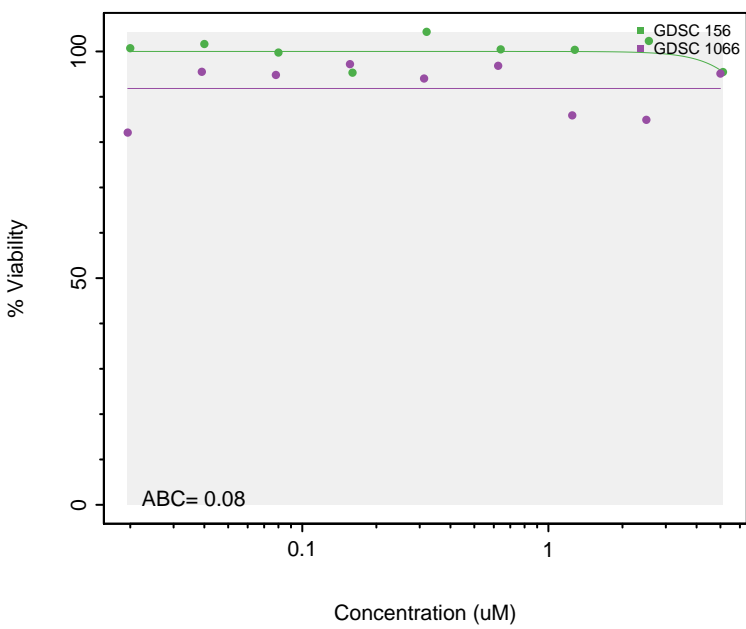

AZD6482:NMC-G1

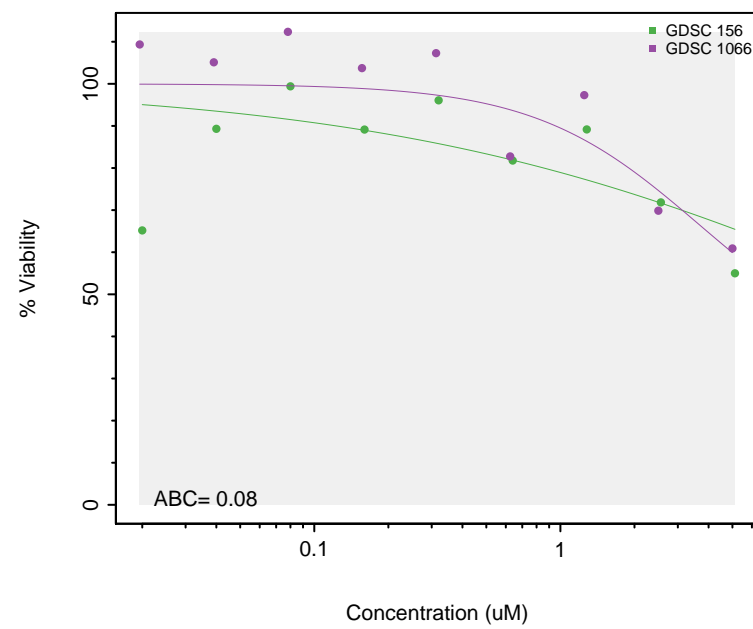

AZD6482:MES-SA

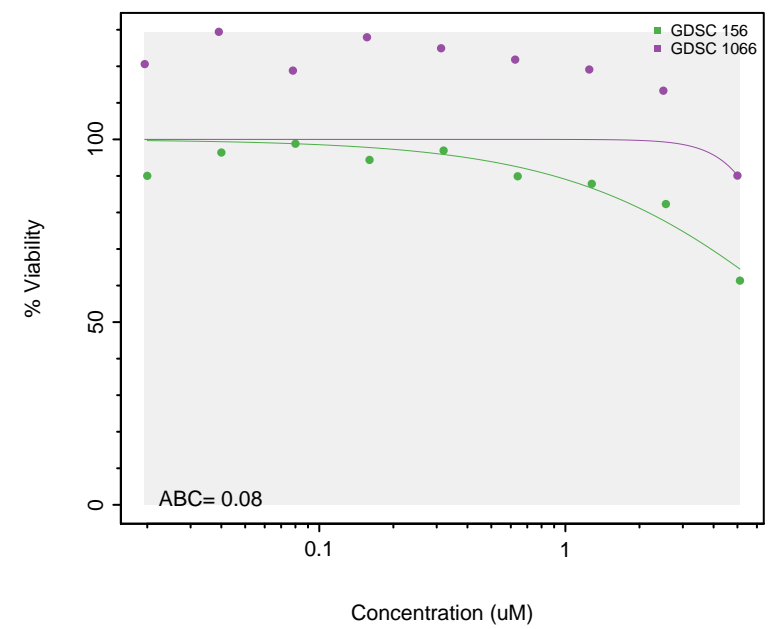

AZD6482:CAL-120

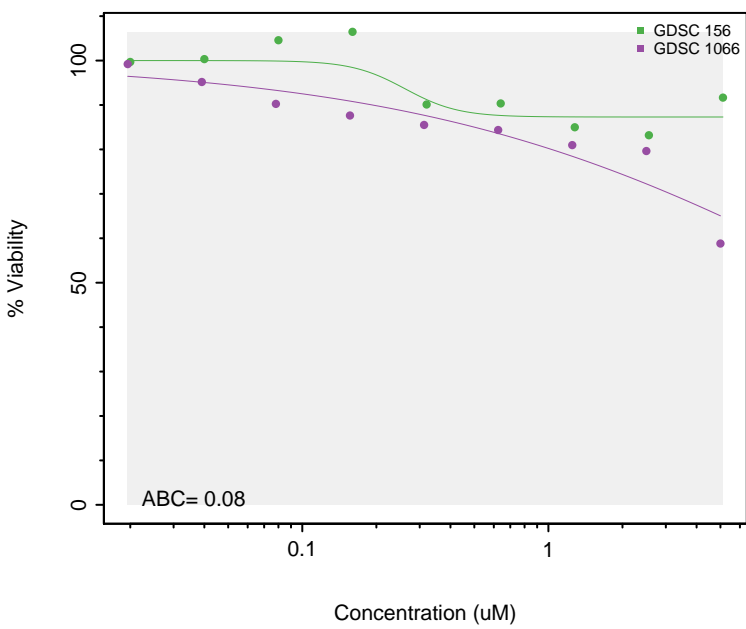

AZD6482:COLO-792

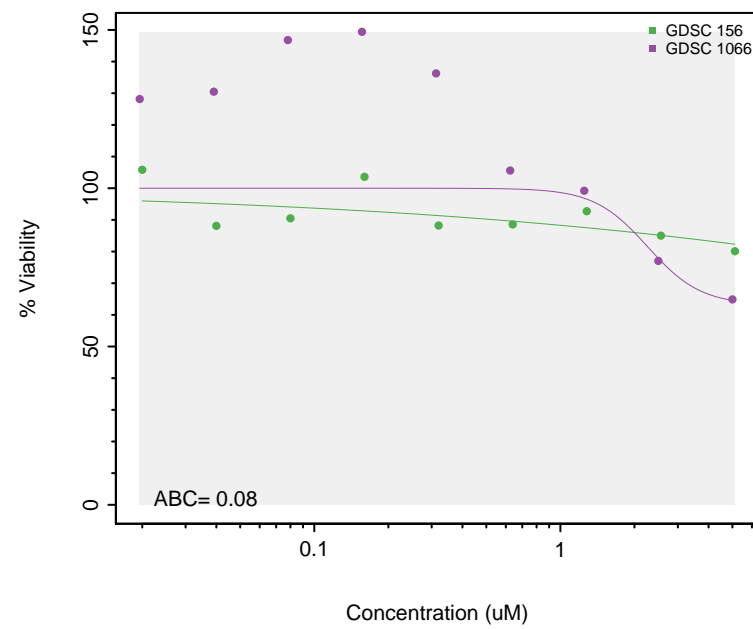

AZD6482:LS-123

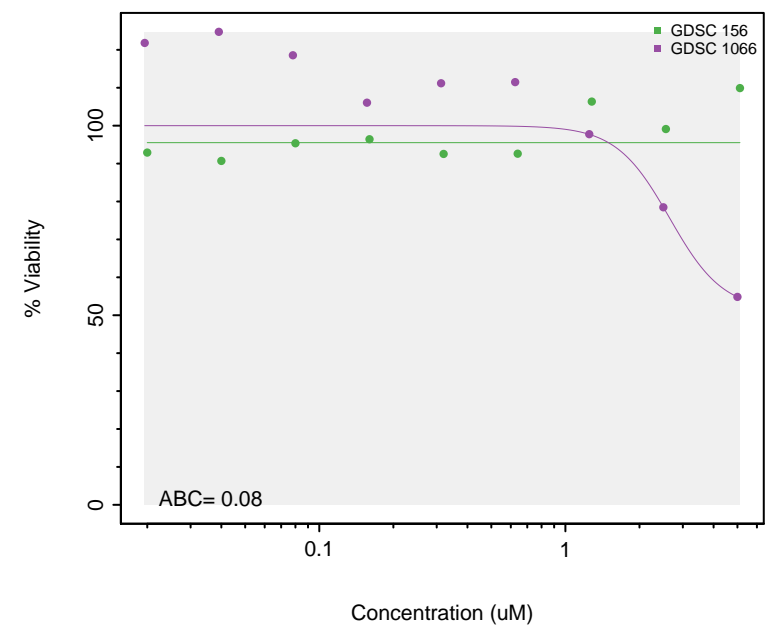

AZD6482:DoTc2-4510

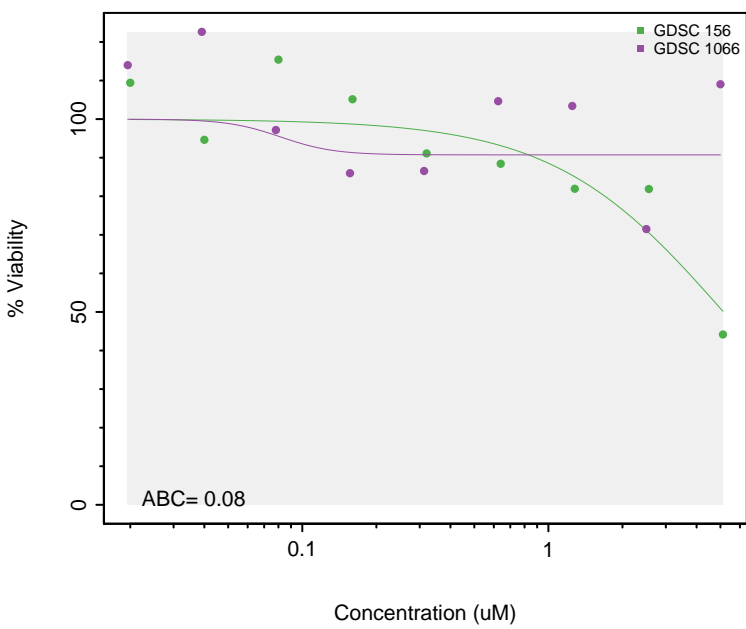

AZD6482:TK10

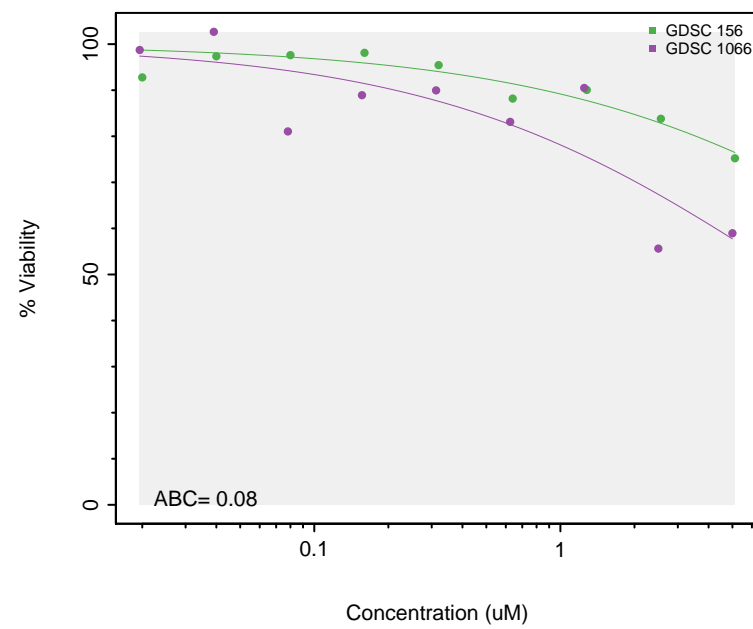

AZD6482:ETK-1

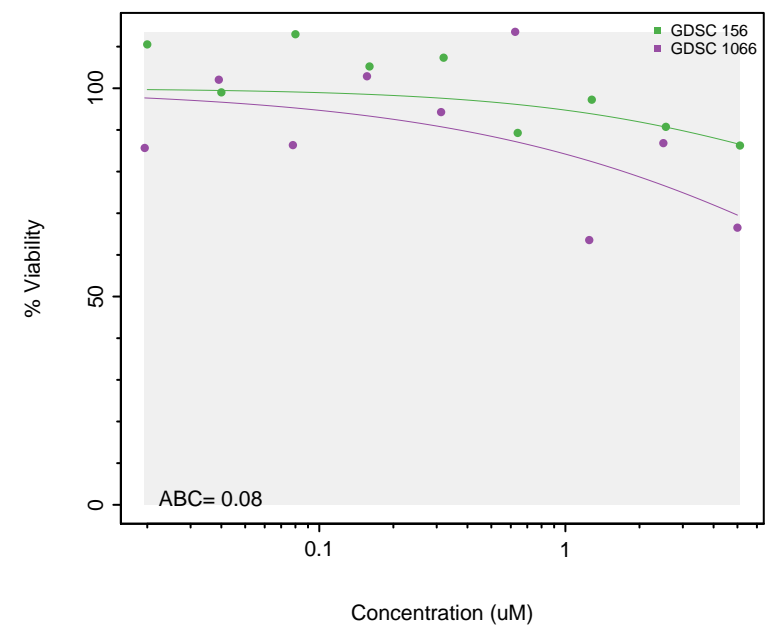

AZD6482:TE-6

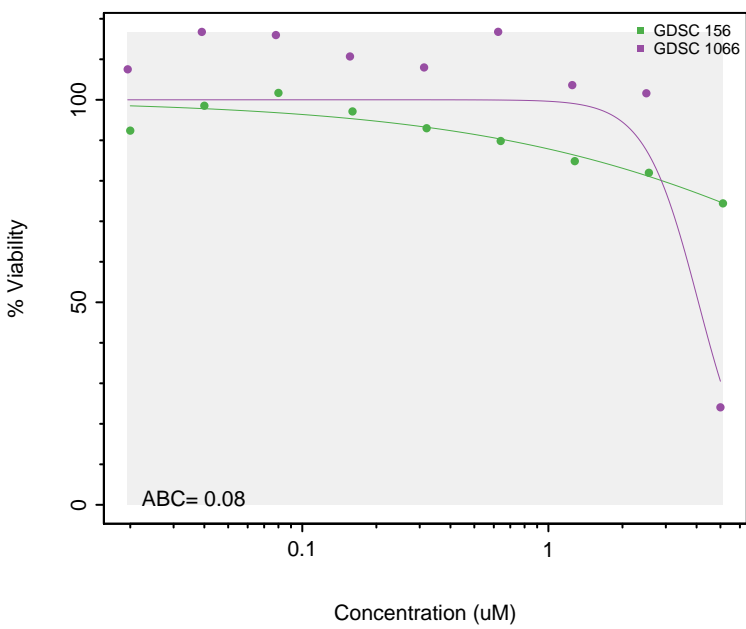

AZD6482:MEG-01

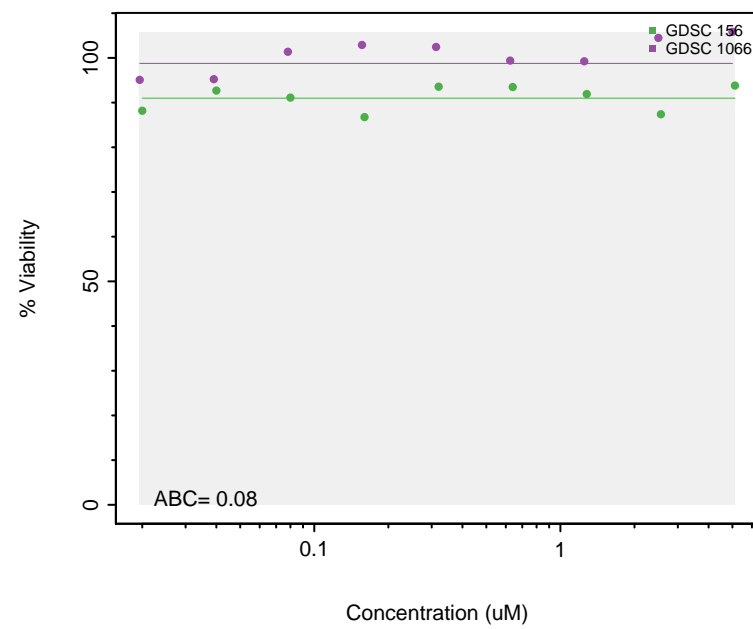

AZD6482:TCCSUP

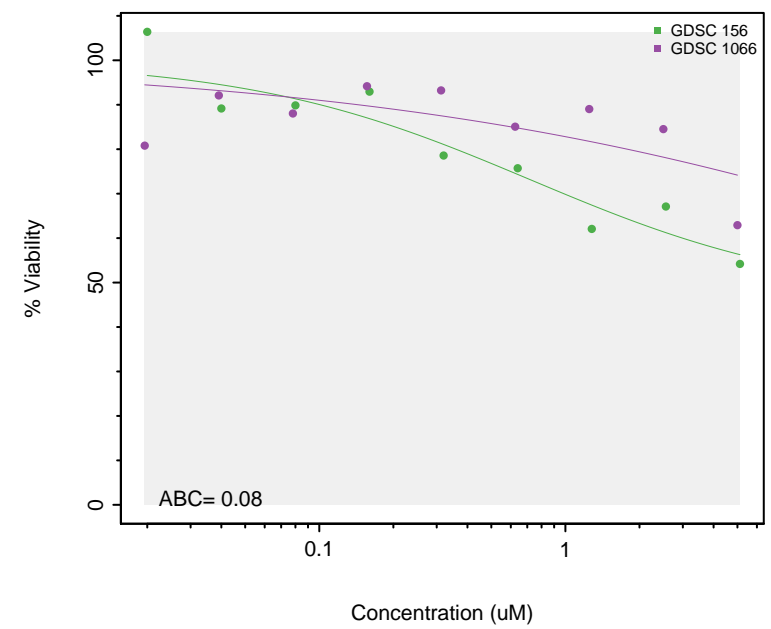

AZD6482:EW-7

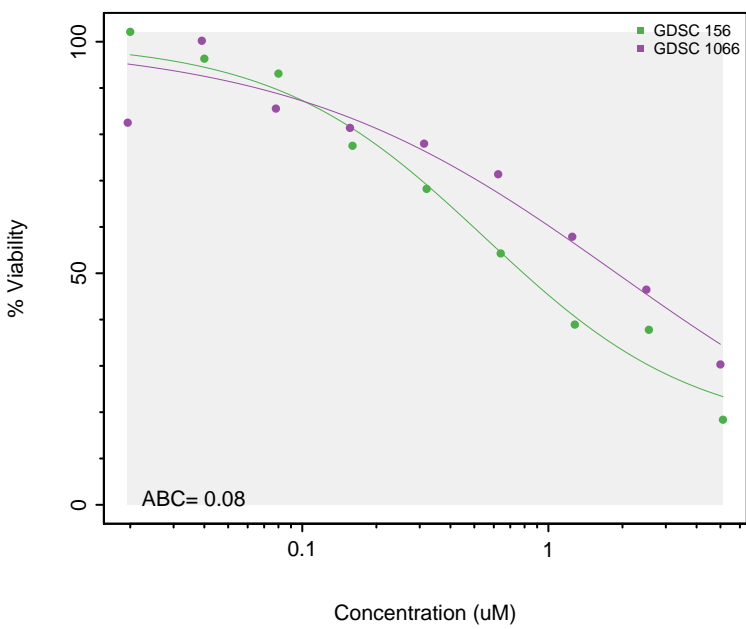

AZD6482:KYSE-520

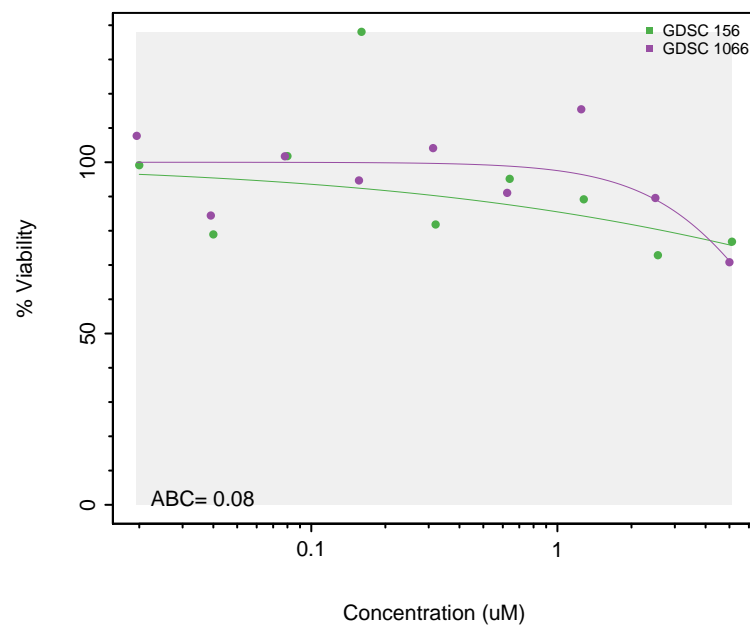

AZD6482:OPM-2

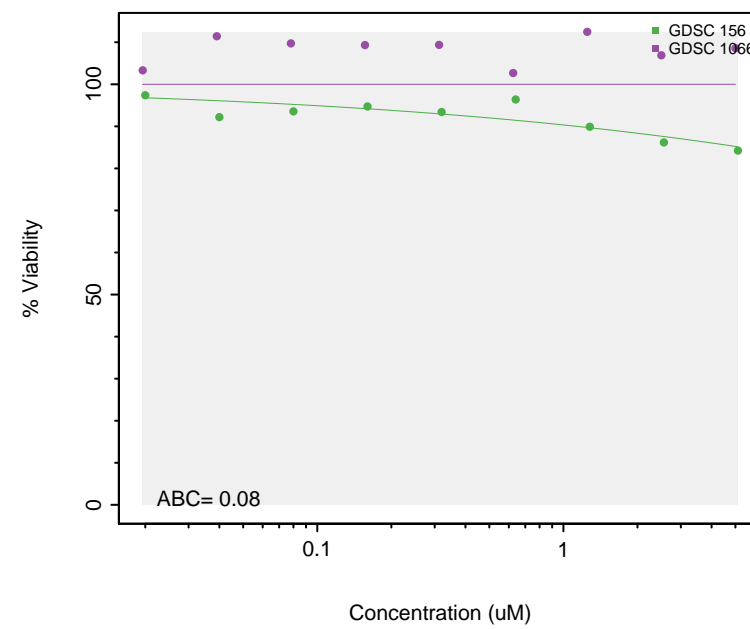

AZD6482:SNU-C2B

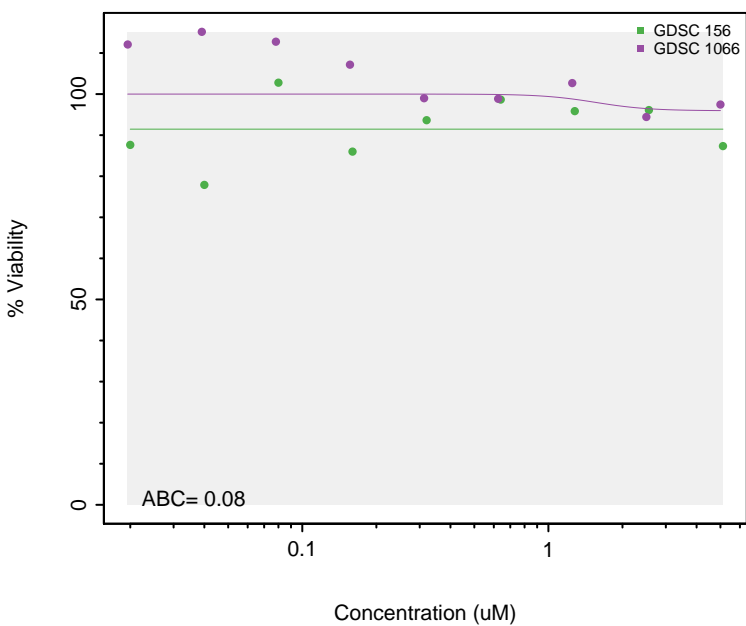

AZD6482:UACC-893

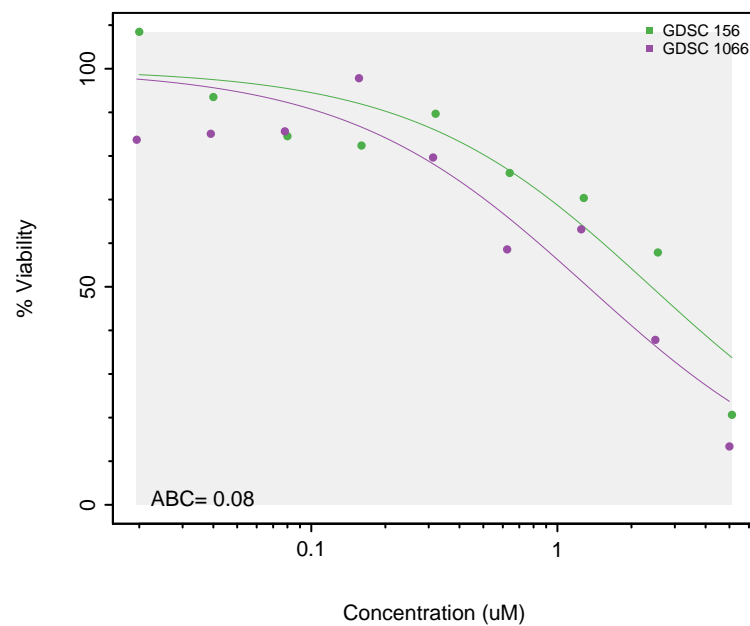

AZD6482:NCI-H1770

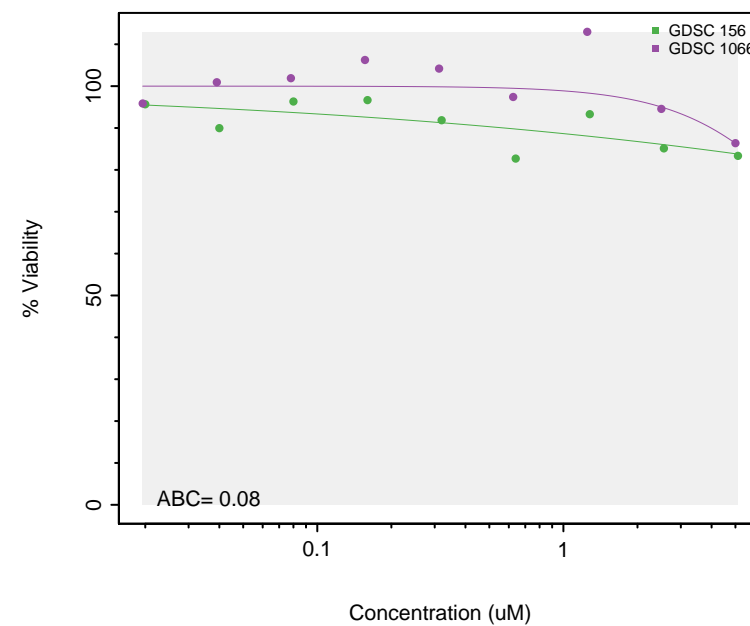

AZD6482:SF268

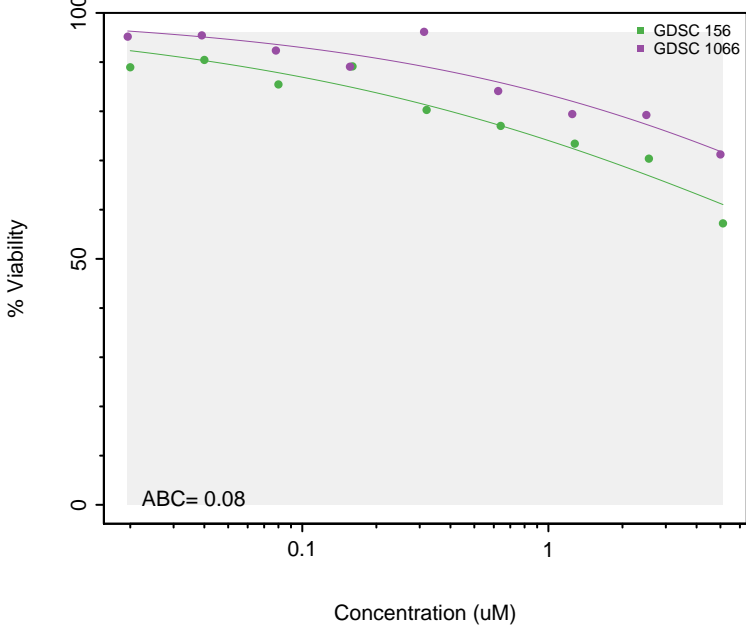

AZD6482:NCI-SNU-16

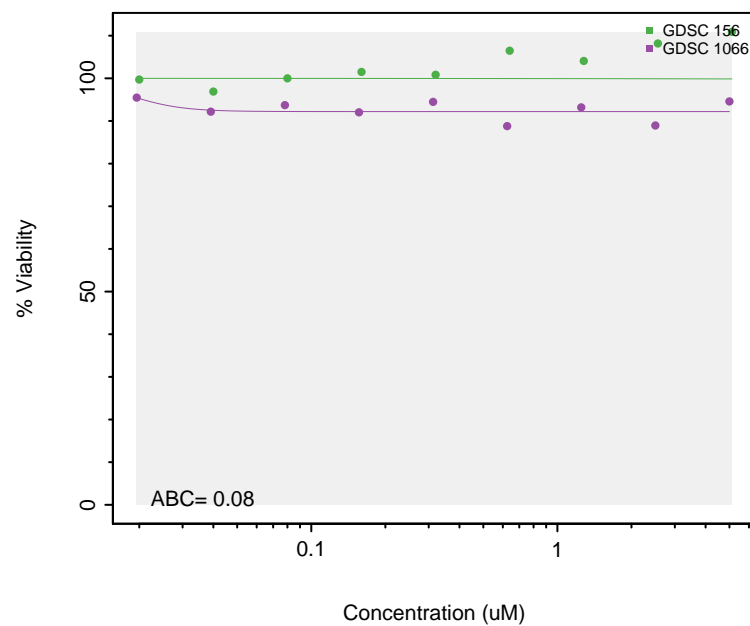

AZD6482:NCI-H650

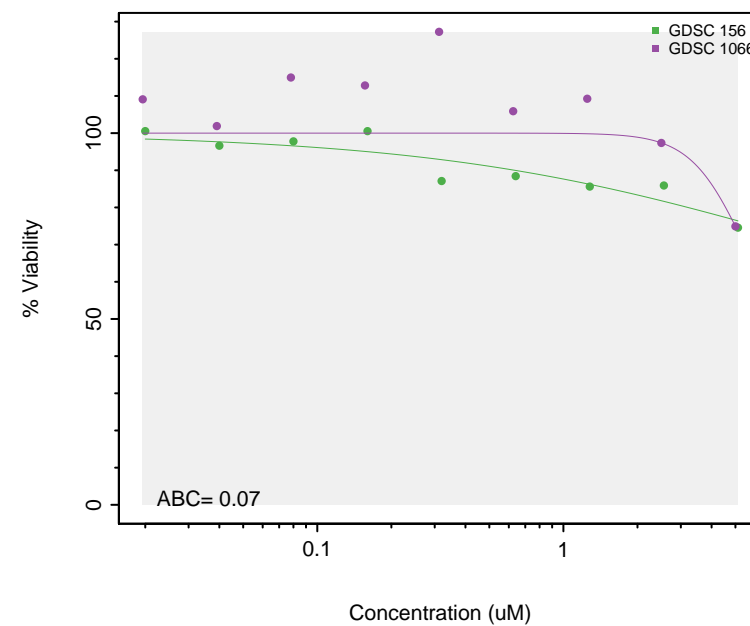

AZD6482:HLE

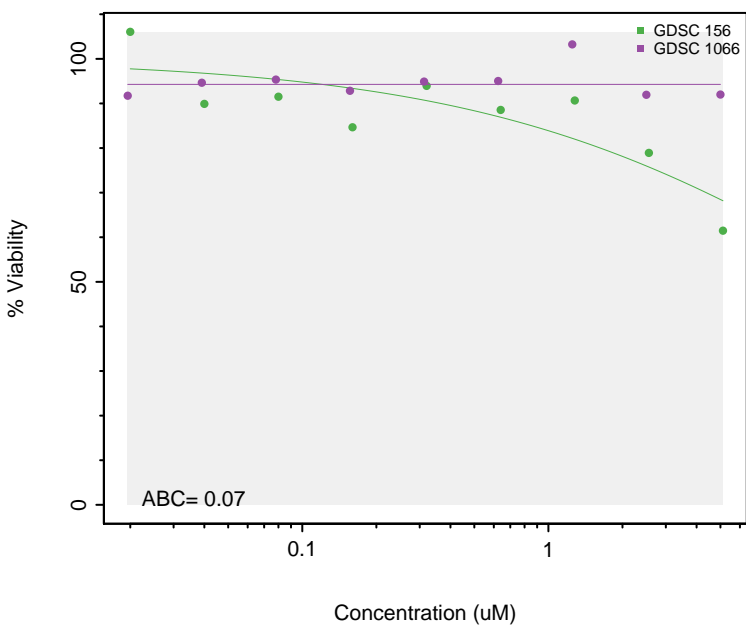

AZD6482:SW1710

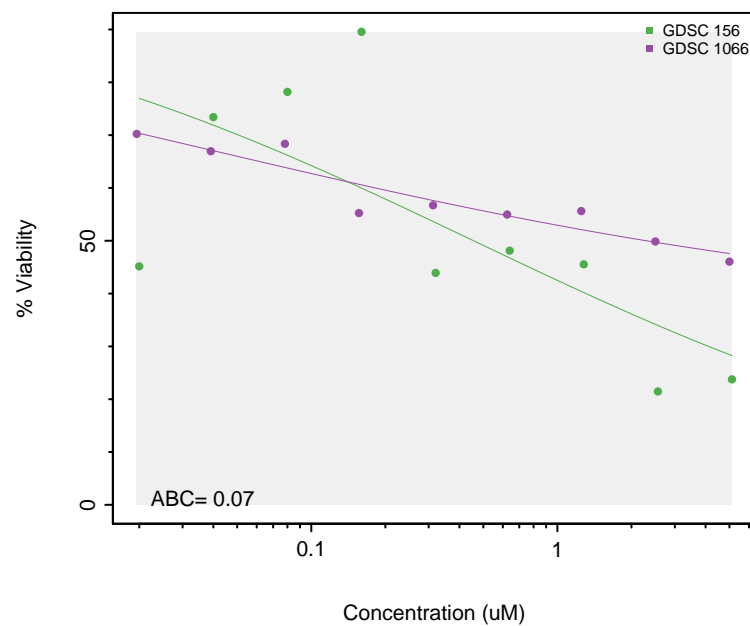

AZD6482:SK-LU-1

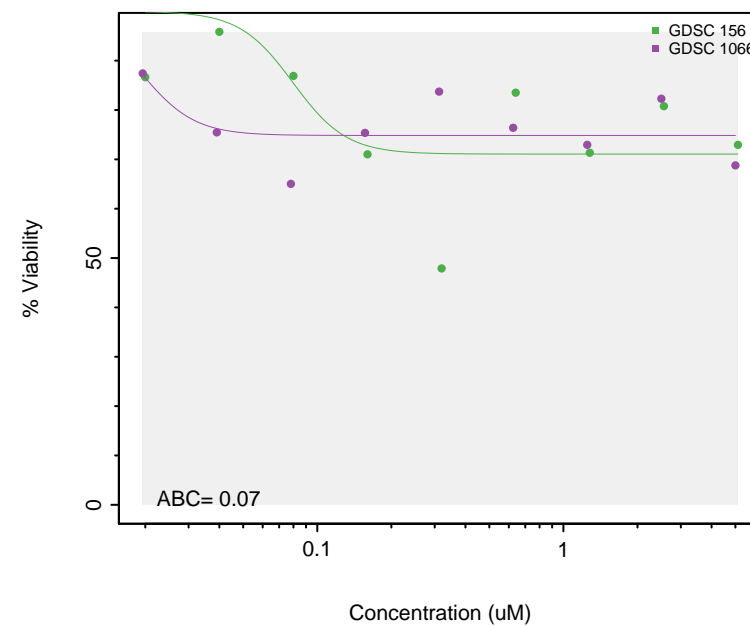

AZD6482:COR-L23

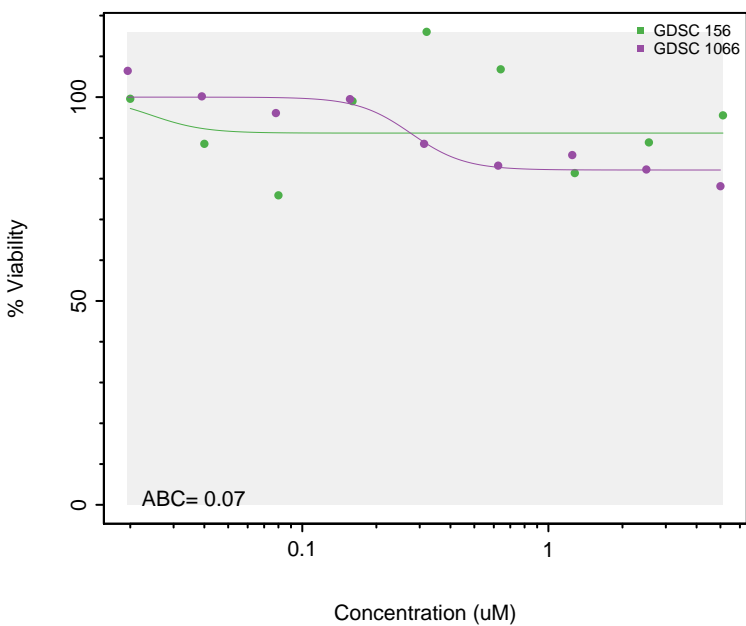

AZD6482:KM12

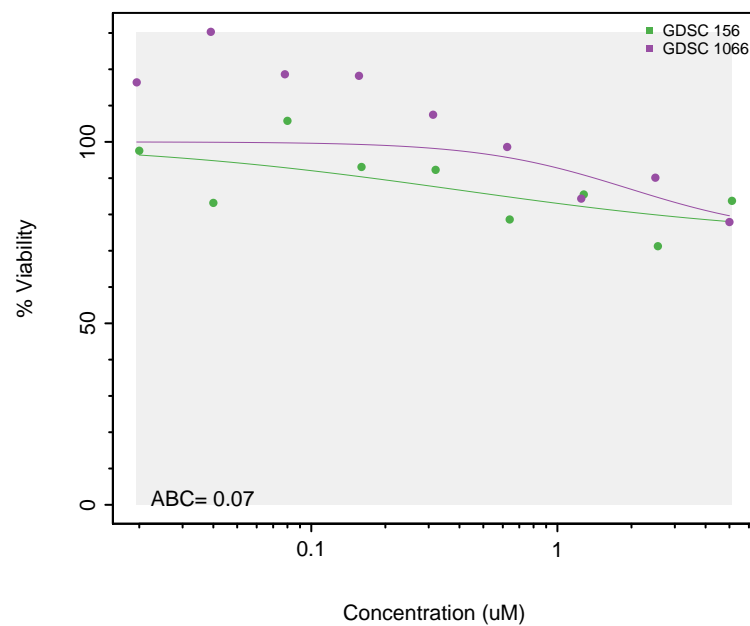

AZD6482:TT

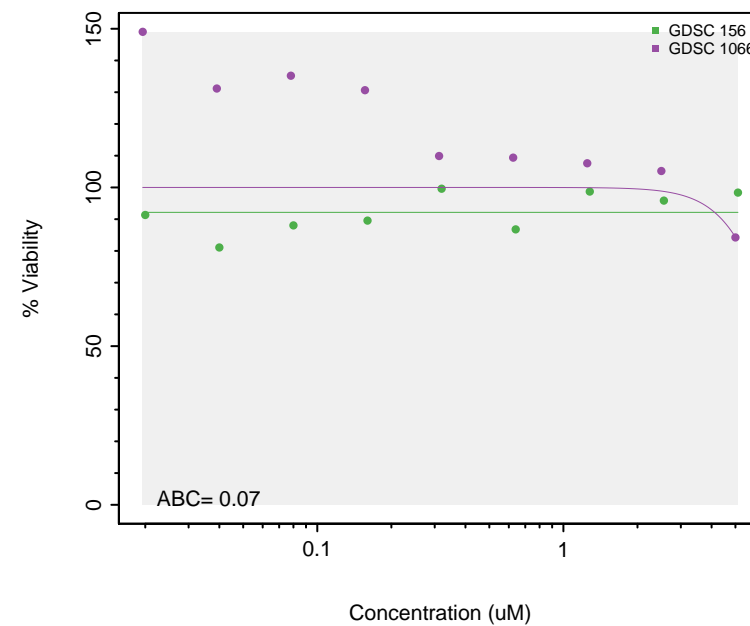

AZD6482:CP66-MEL

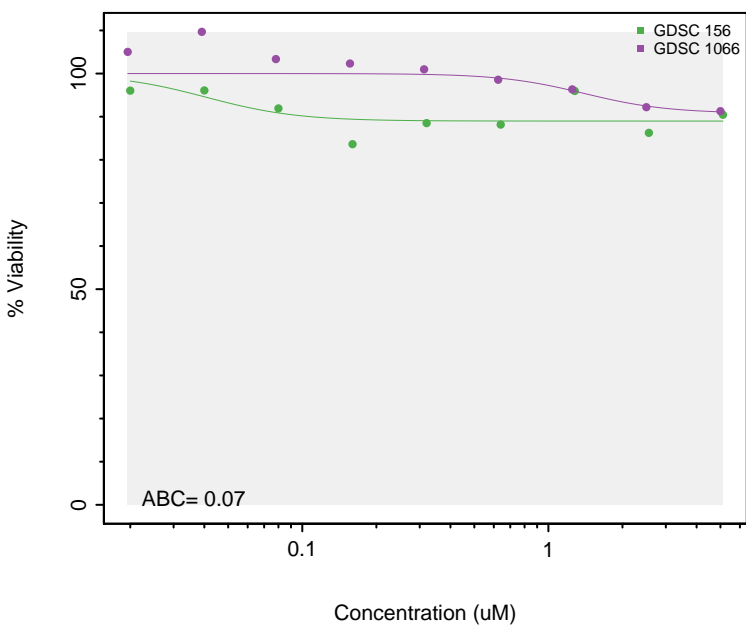

AZD6482:HO-1-N-1

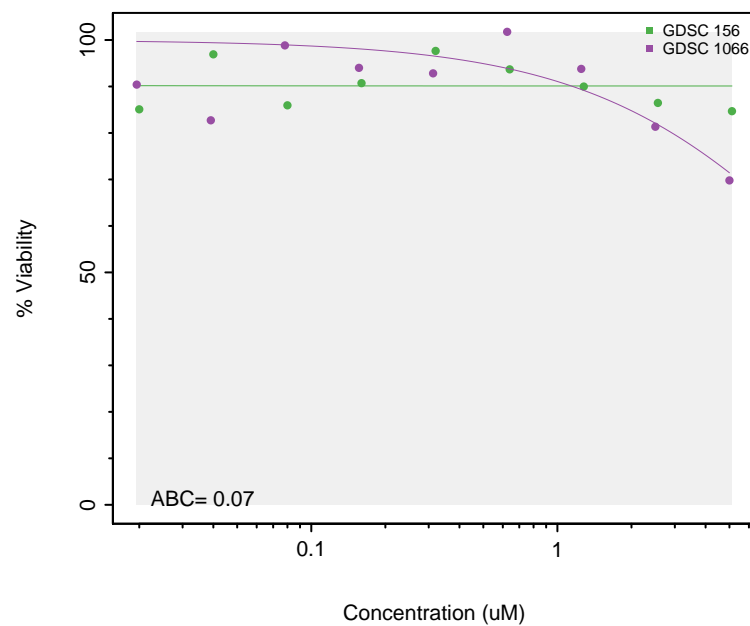

AZD6482:NCI-H1581

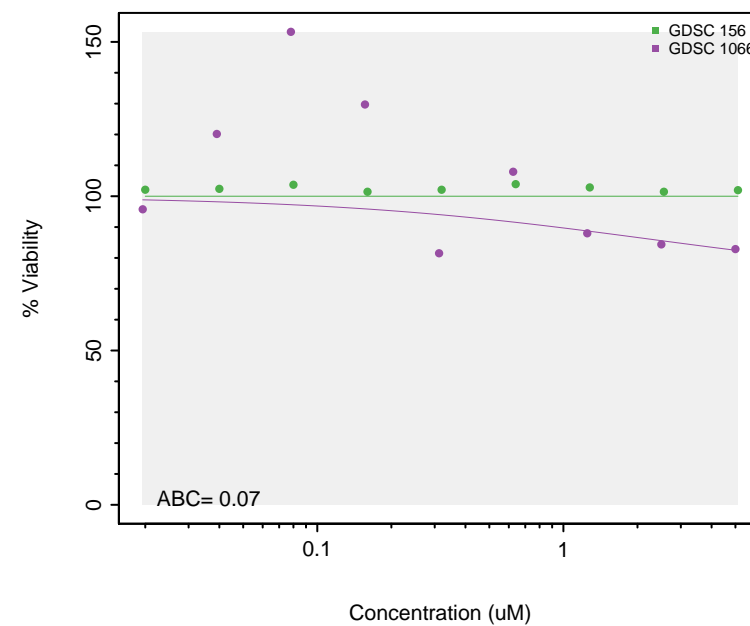

AZD6482:UACC-62

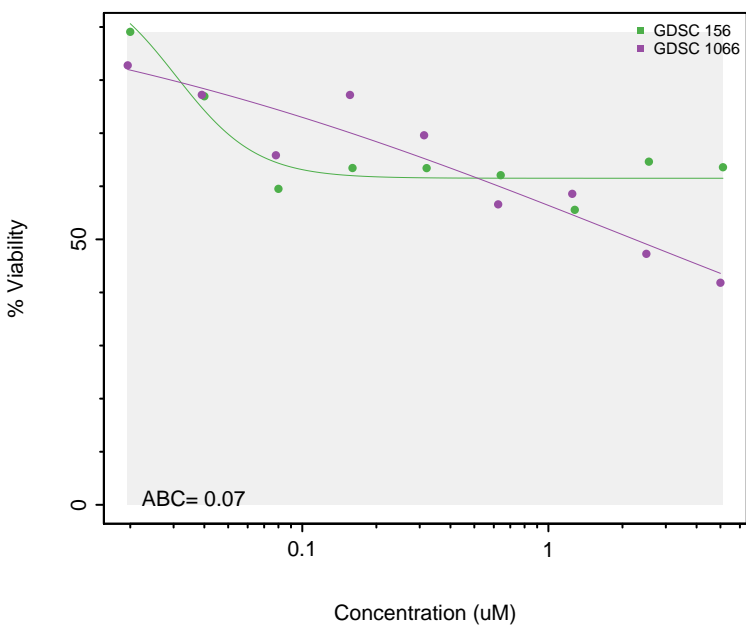

AZD6482:EW-1

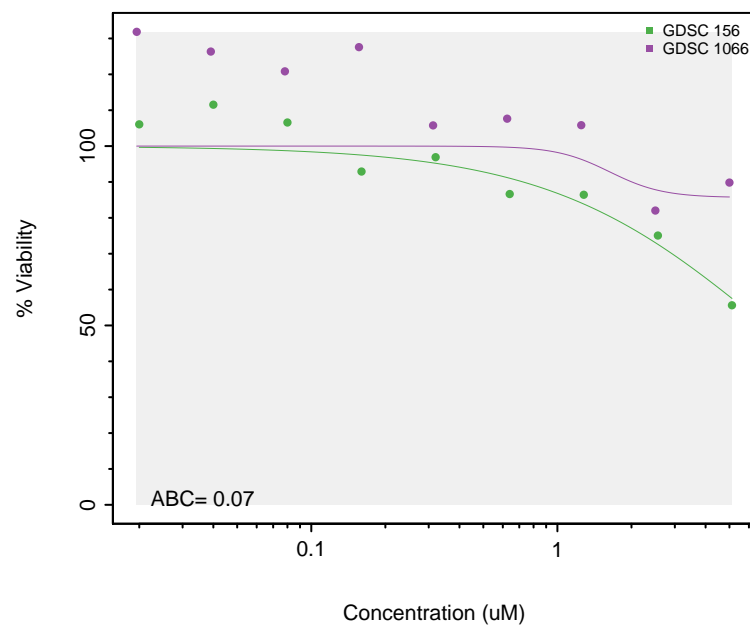

AZD6482:KASUMI-1

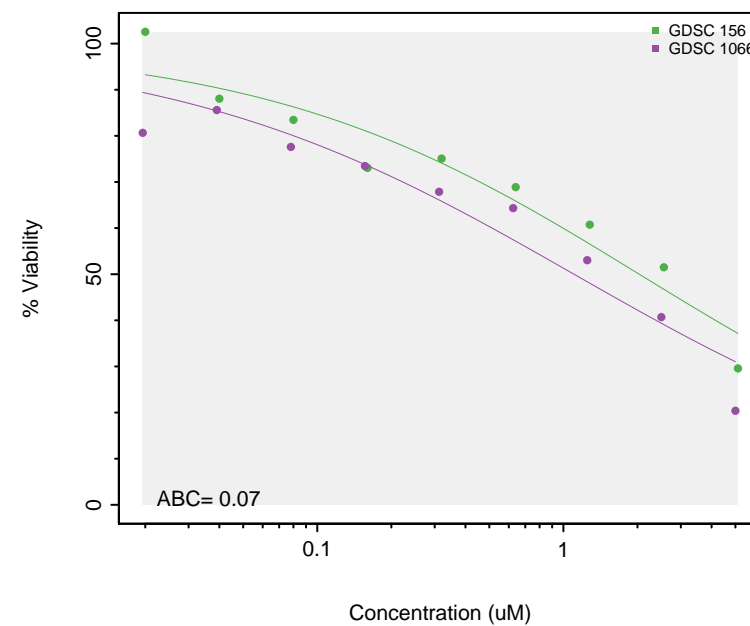

AZD6482:KG-1

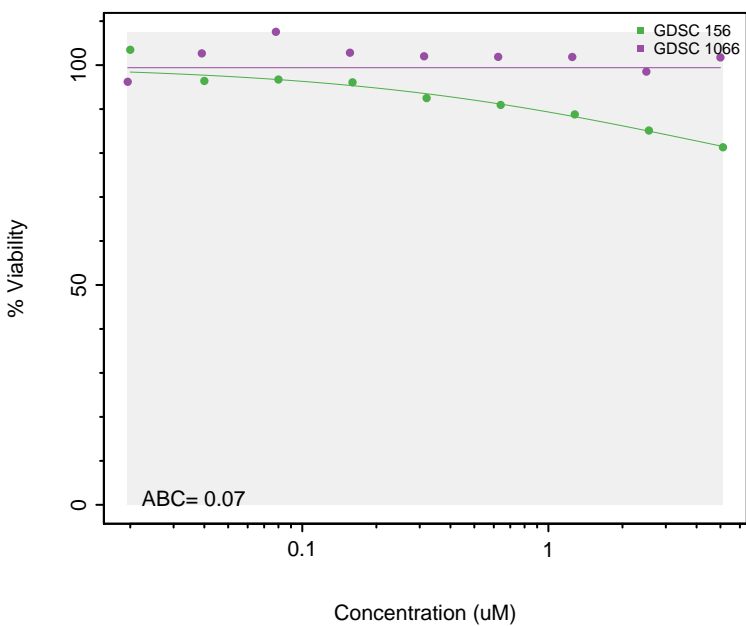

AZD6482:KOSC-2

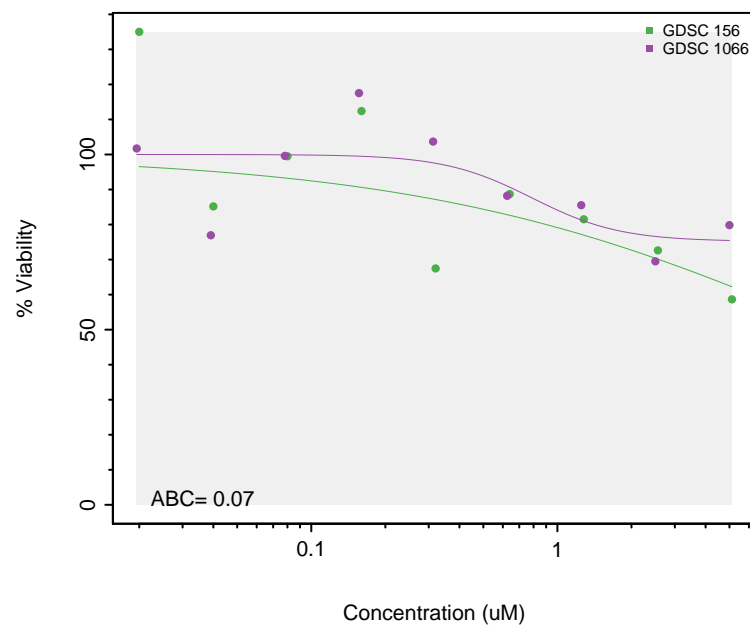

AZD6482:DOK

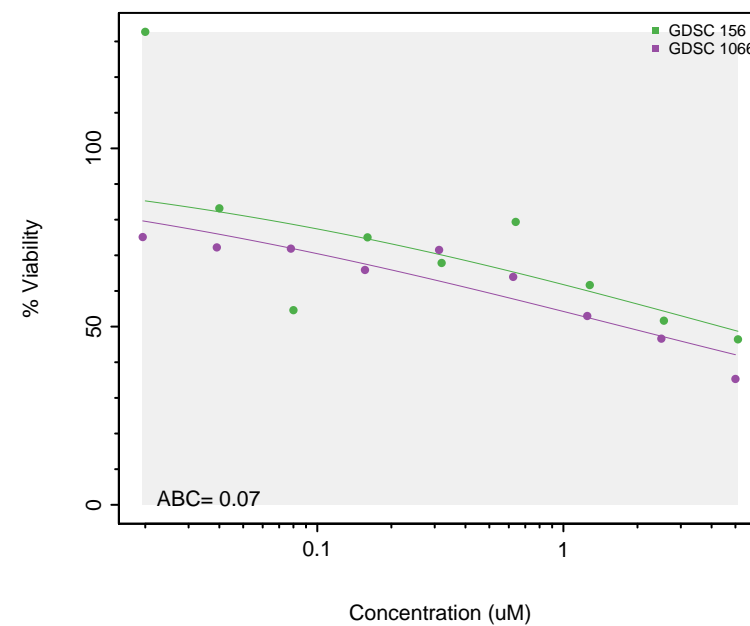

AZD6482:NTERA-S-cl-D1

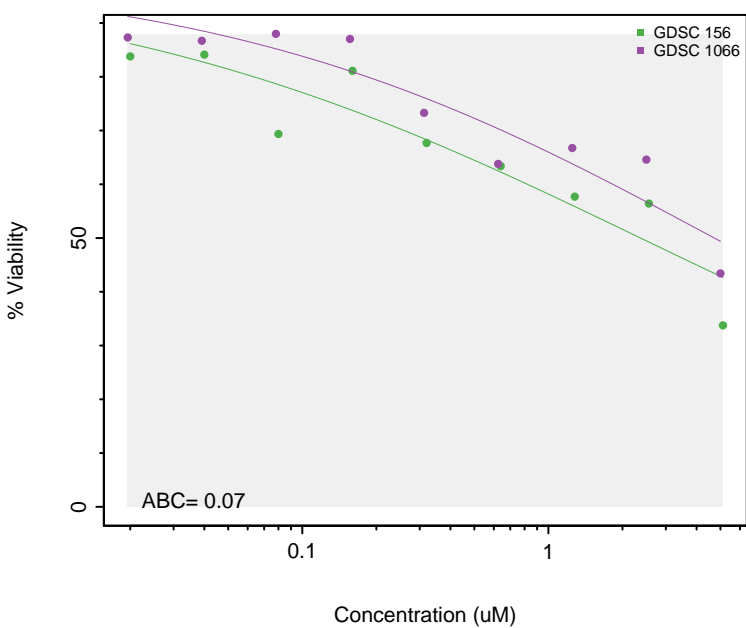

AZD6482:RS4;11

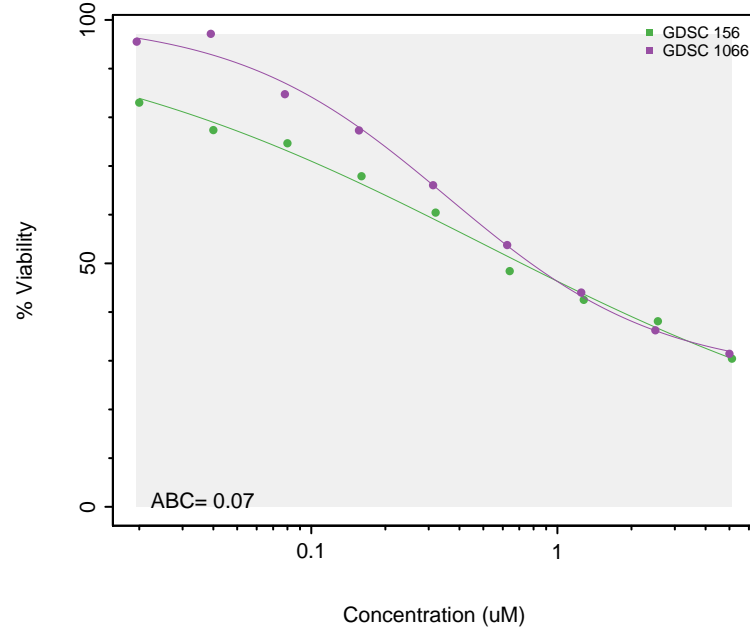

AZD6482:ME-180

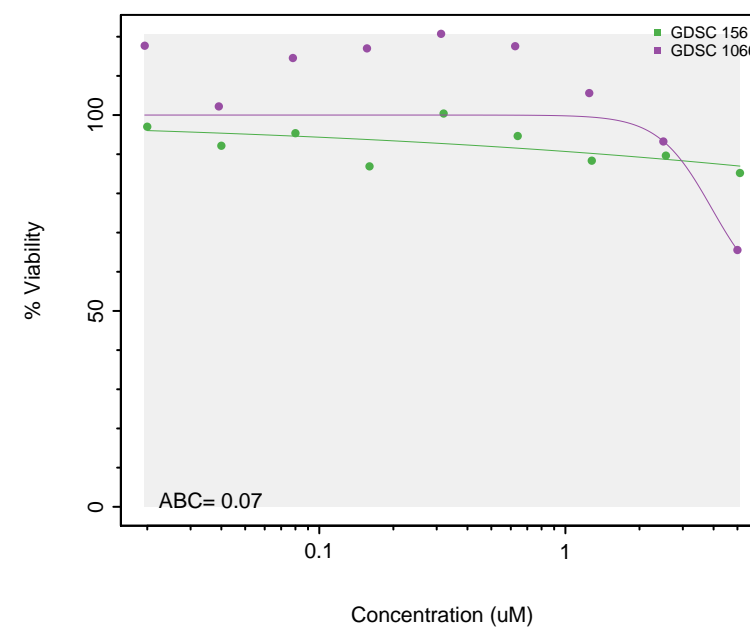

AZD6482:ST486

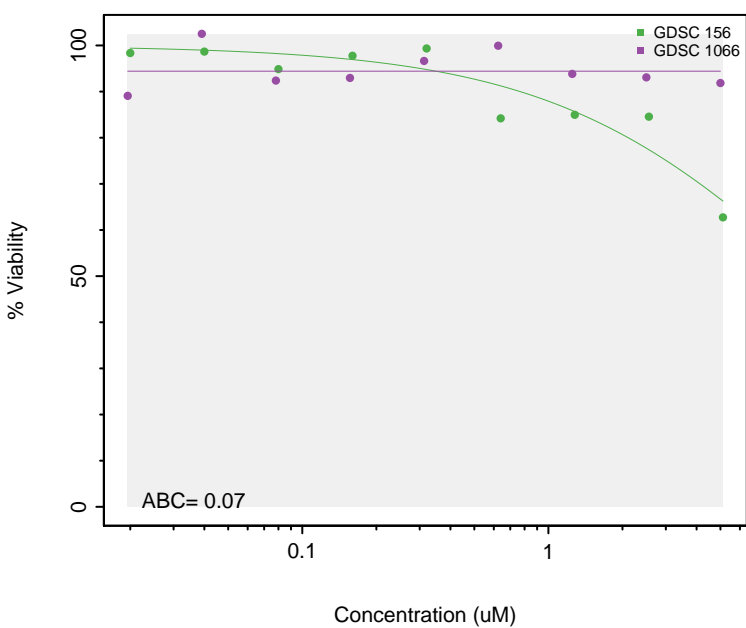

AZD6482:A673

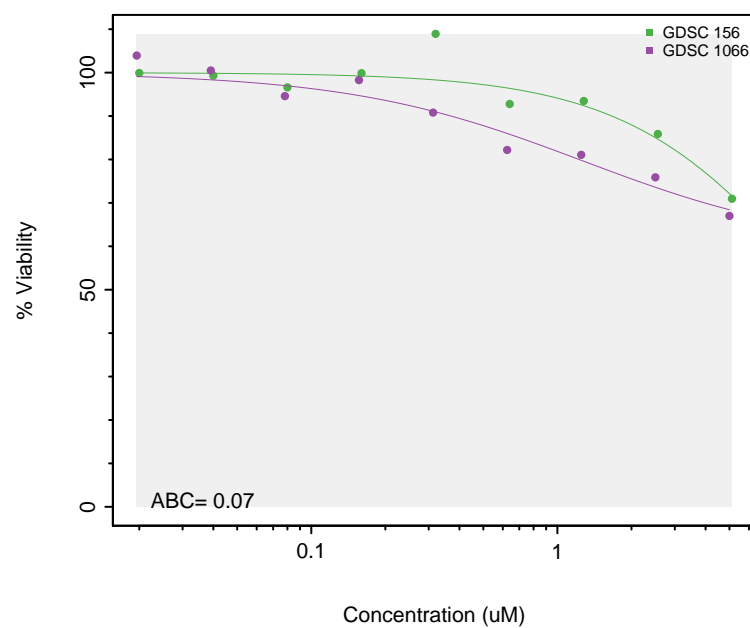

AZD6482:TE-11

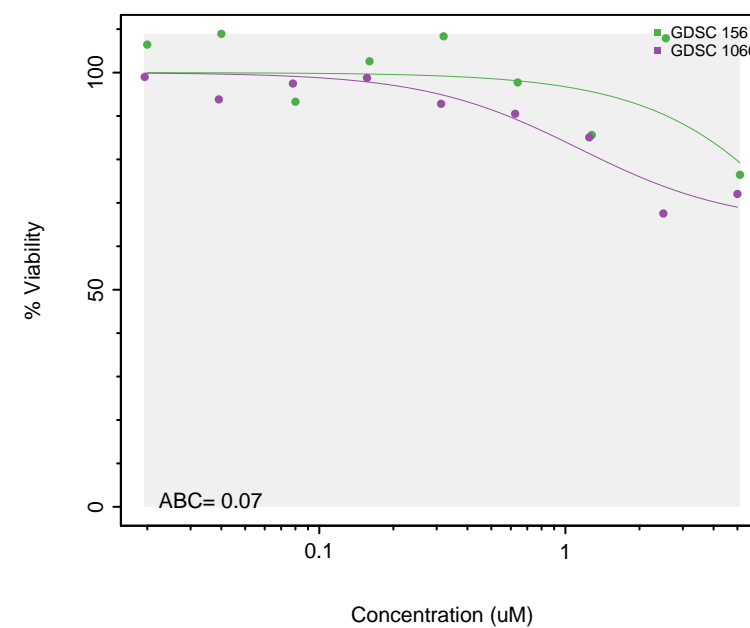

AZD6482:CPC-N

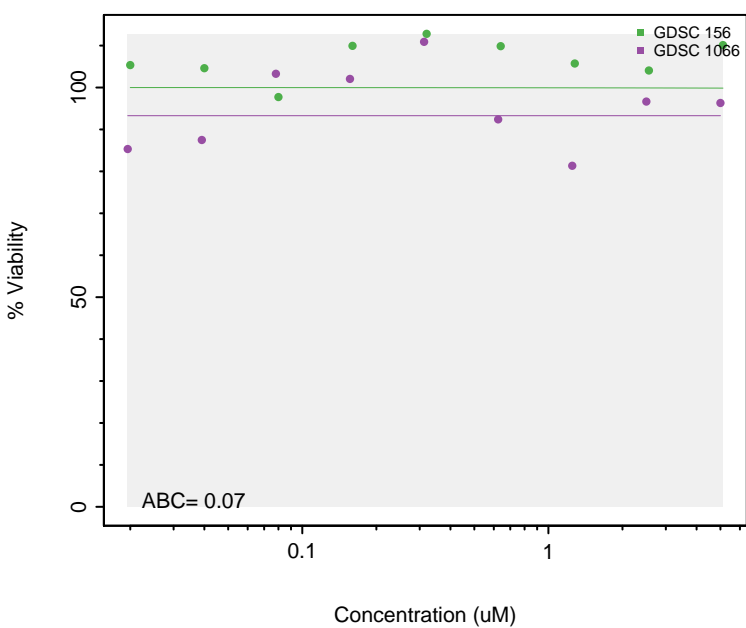

AZD6482:MZ7-mel

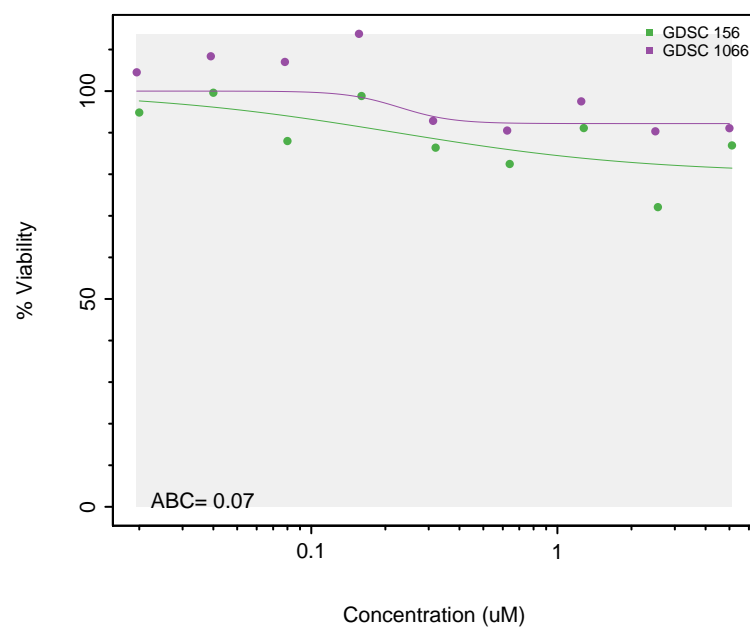

AZD6482:RVH-421

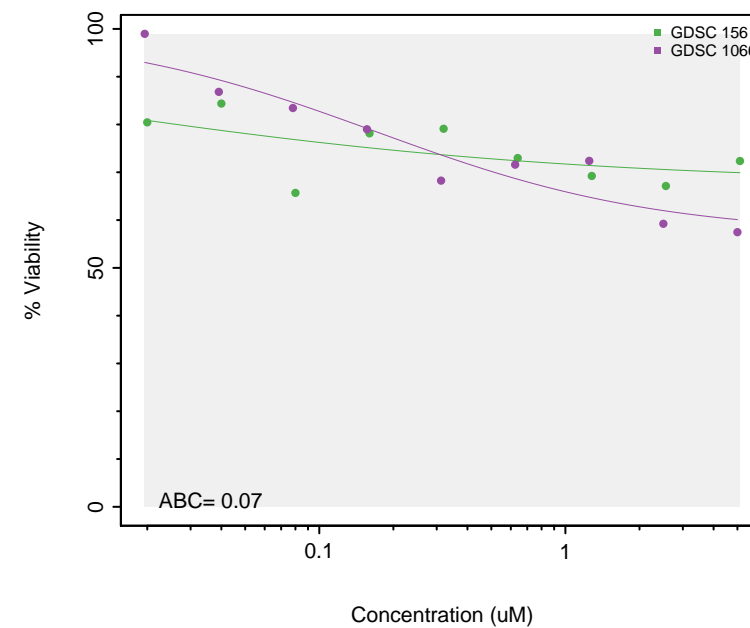

AZD6482:WM-115

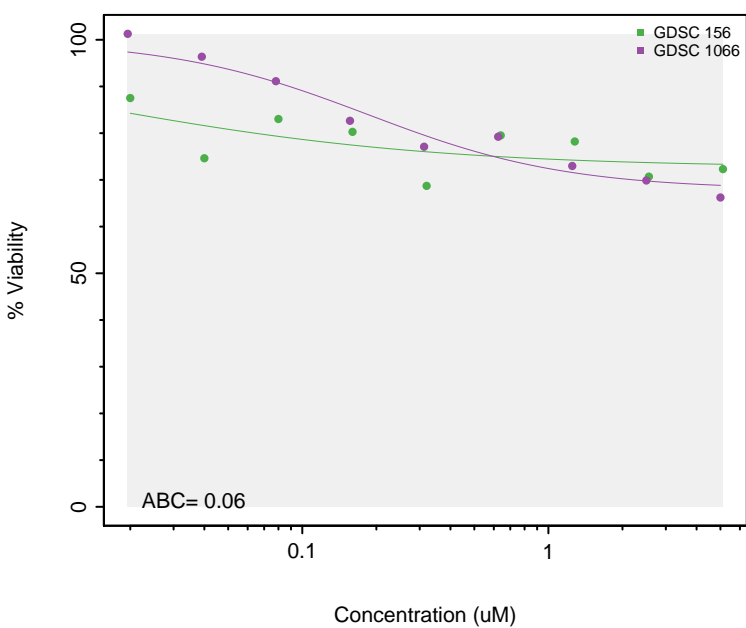

AZD6482:VM-CUB-1

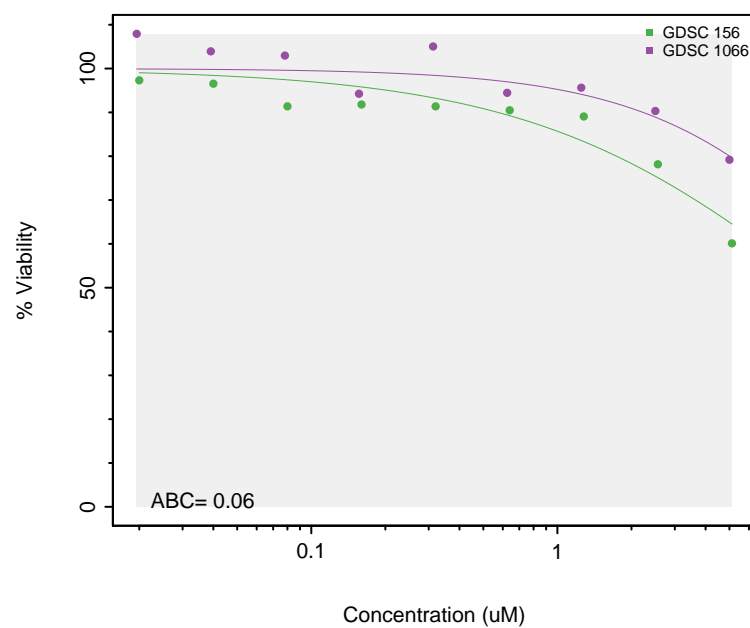

AZD6482:KARPAS-299

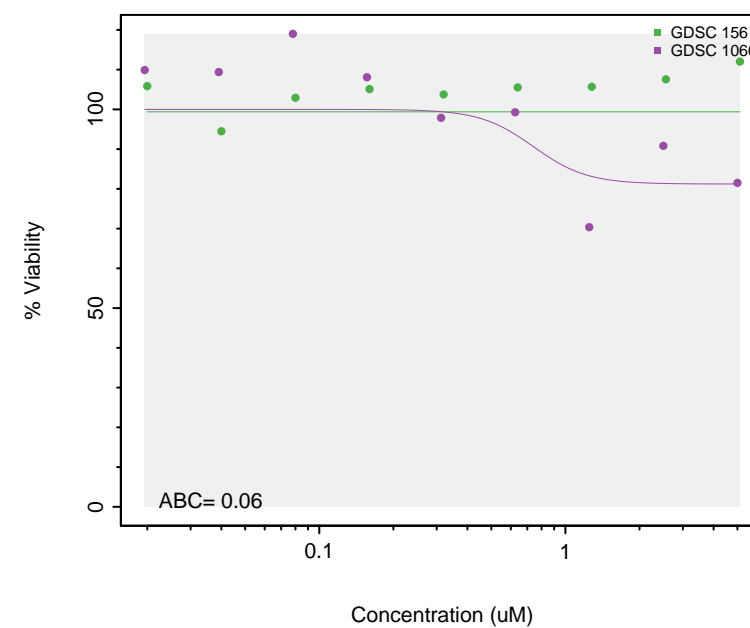

AZD6482:HCE-4

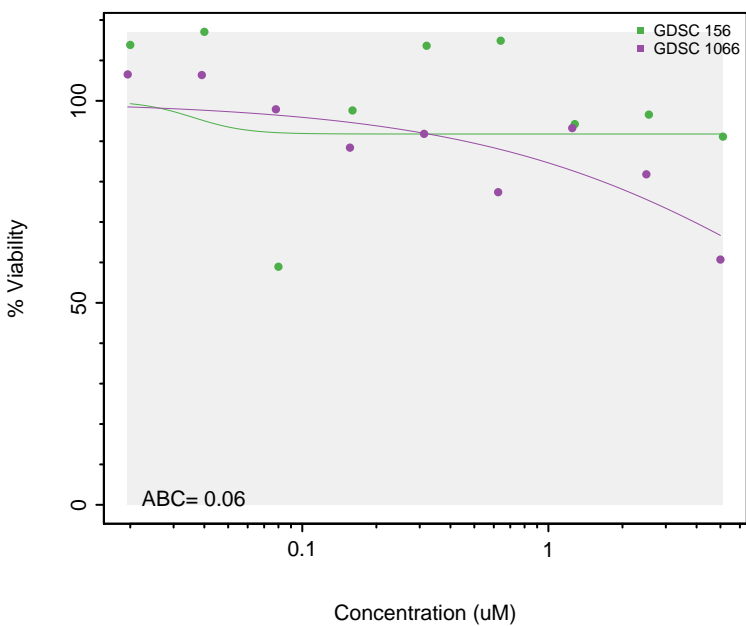

AZD6482:COLO-679

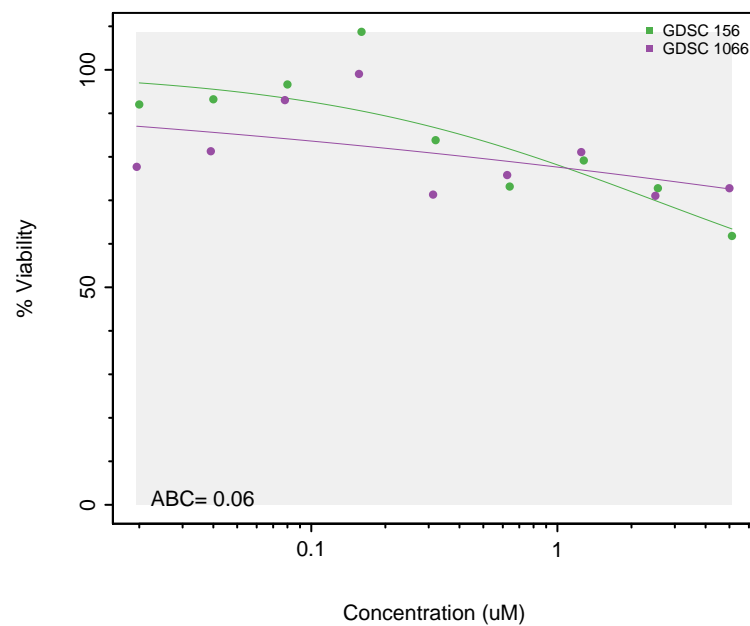

AZD6482:HSC-2

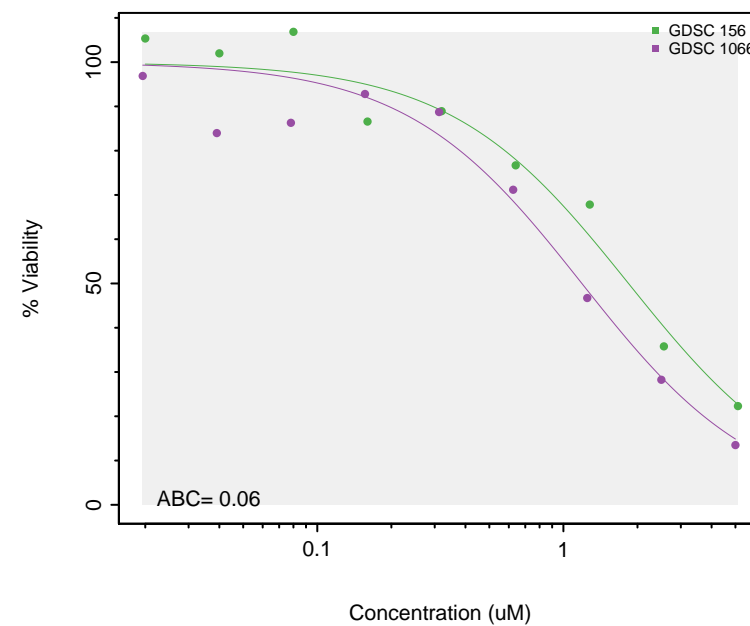

AZD6482:NCI-H1734

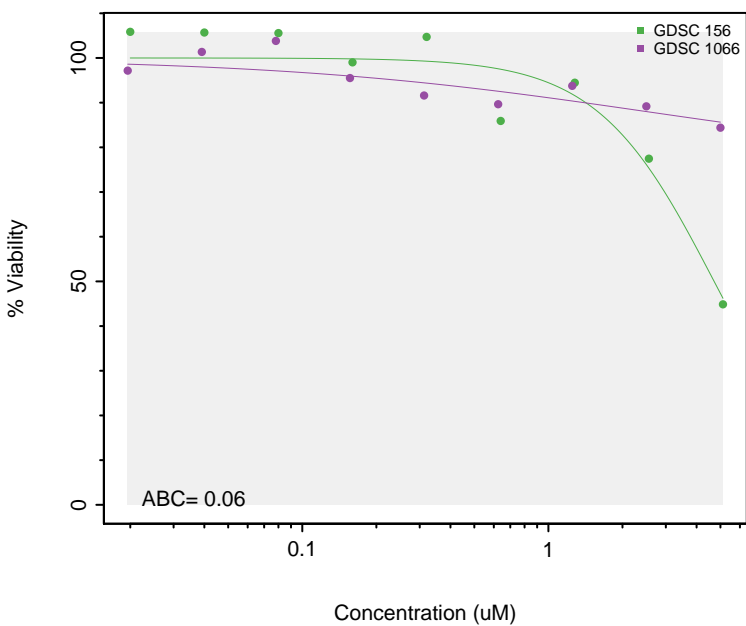

AZD6482:C-33-A

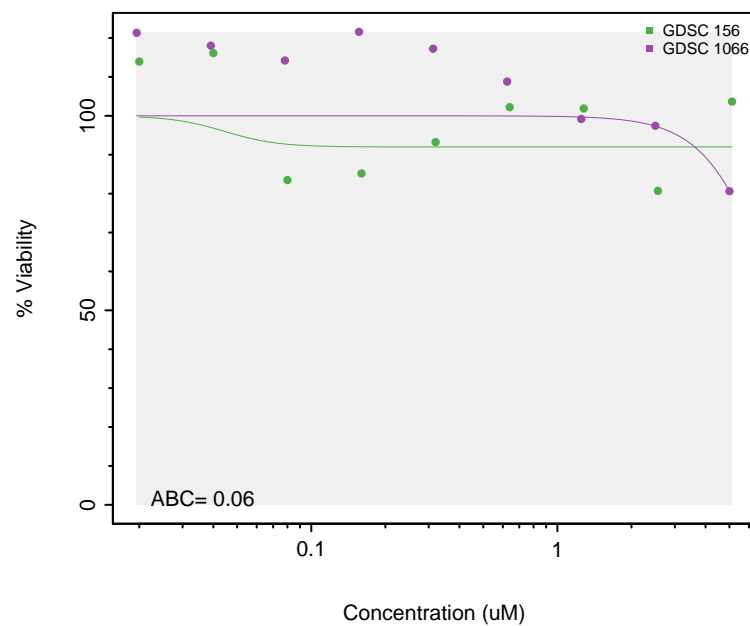

AZD6482:HEC-1

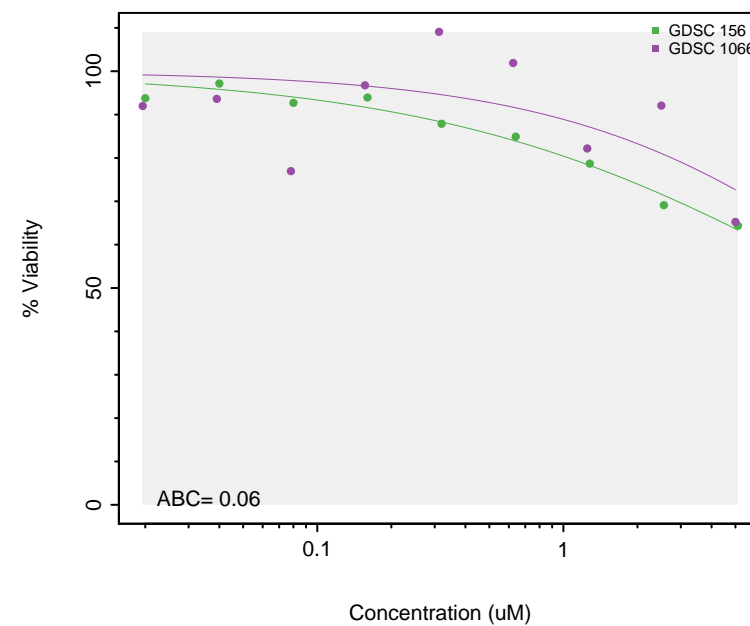

AZD6482:NCI-H1048

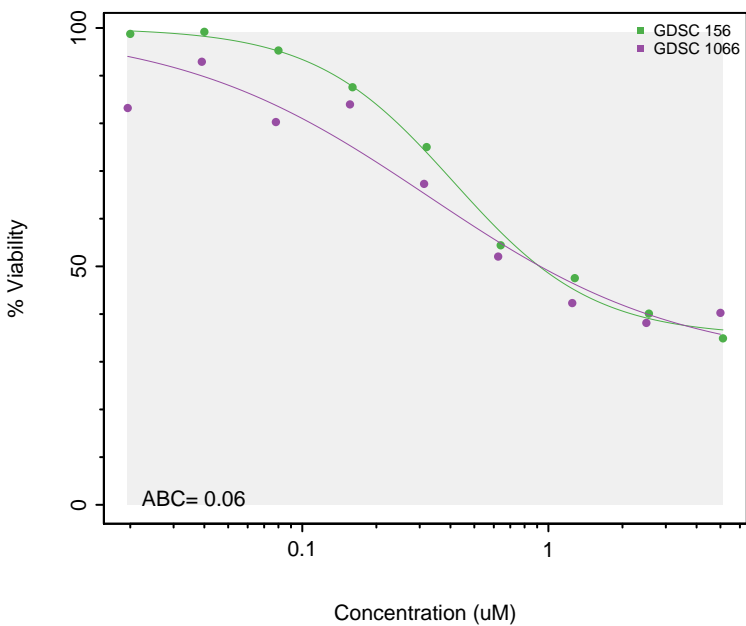

AZD6482:L-428

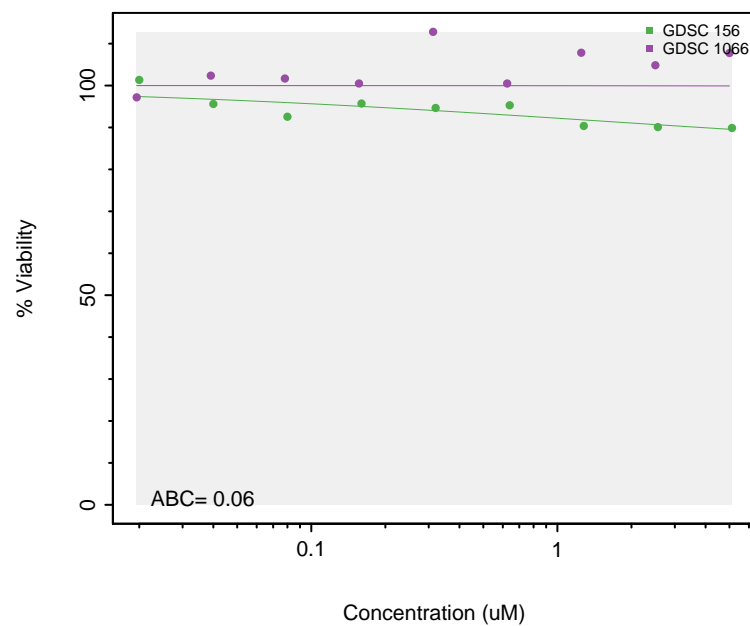

AZD6482:LS-411N

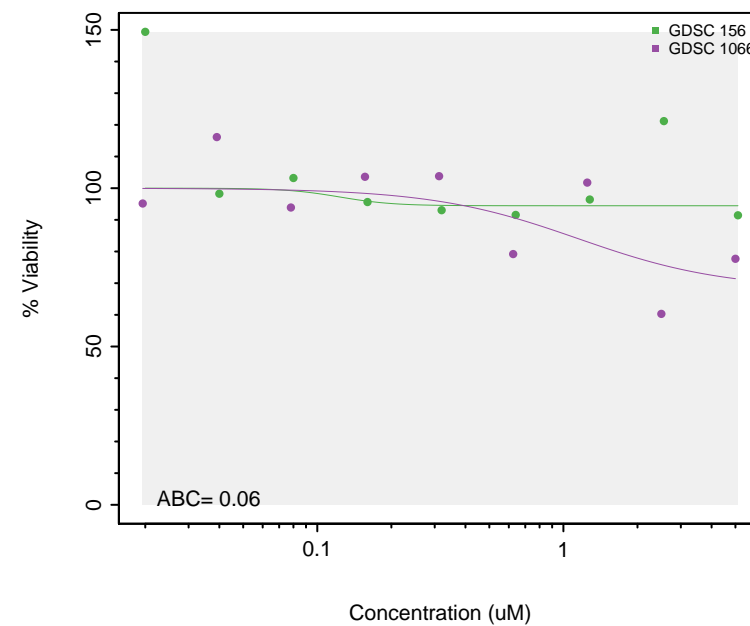

AZD6482:NCI-H322M

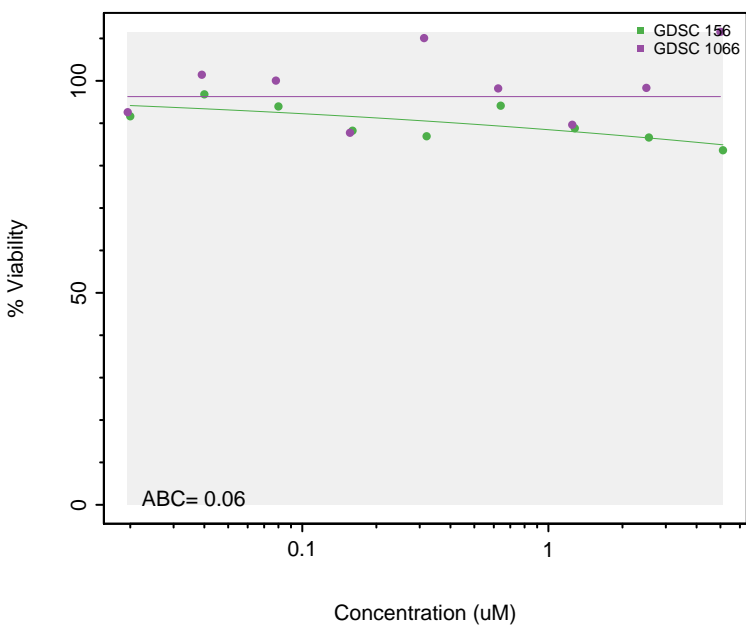

AZD6482:HT-29

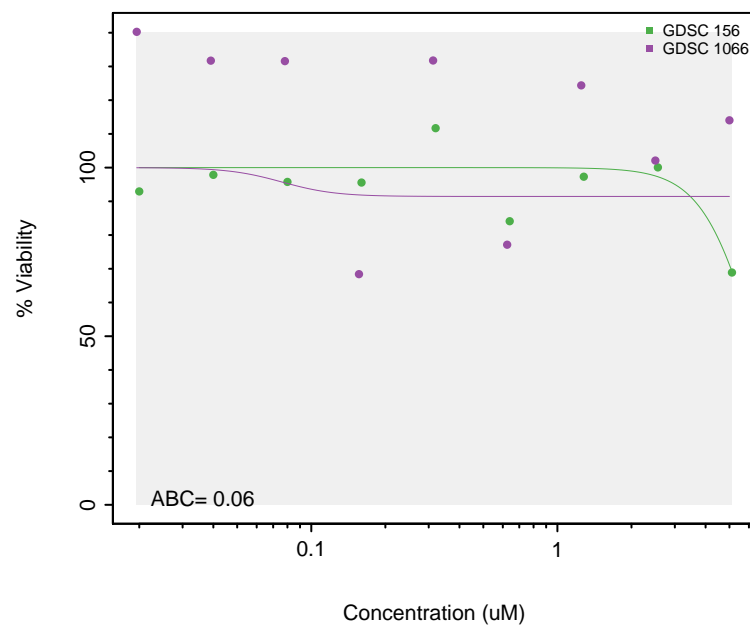

AZD6482:SW1417

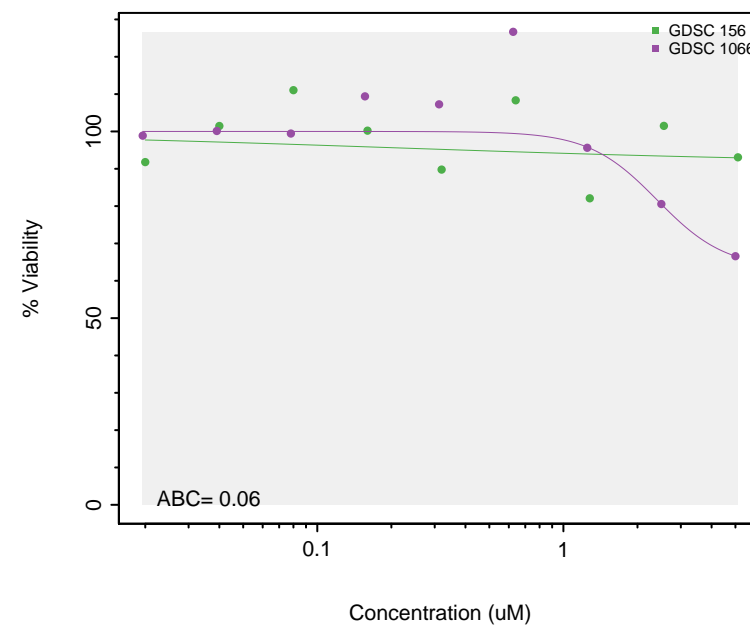



AZD6482:L-540

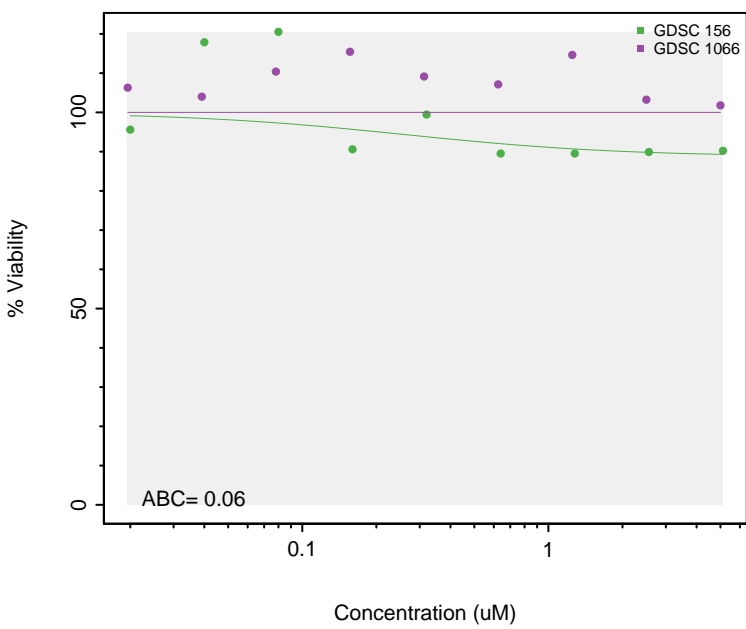

AZD6482:CAL-62

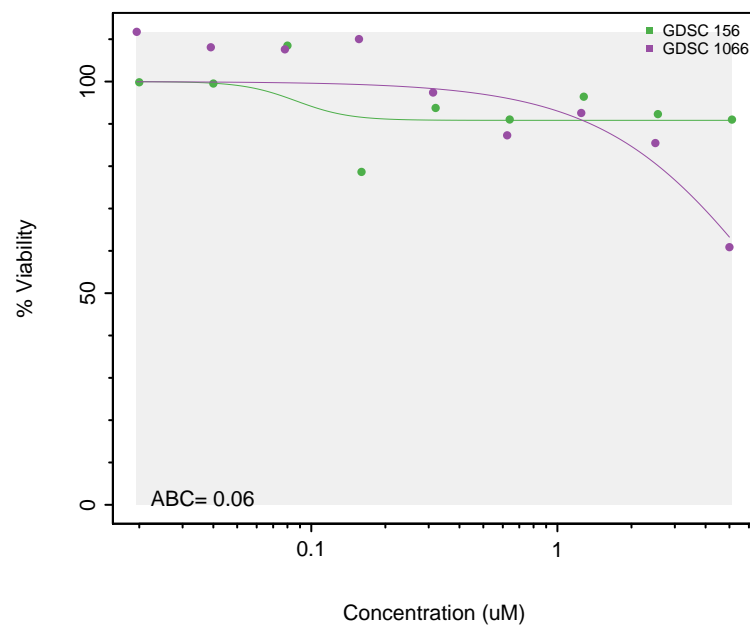

AZD6482:T-24

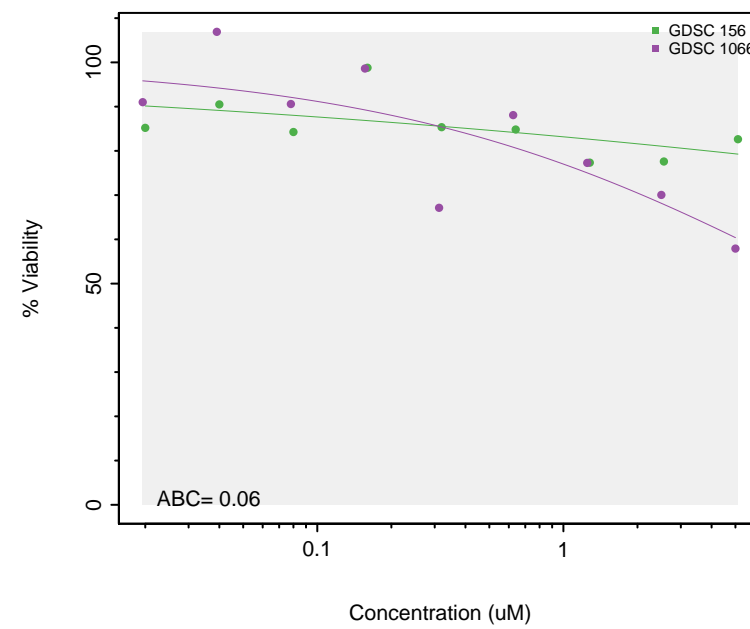

AZD6482:OMC-1

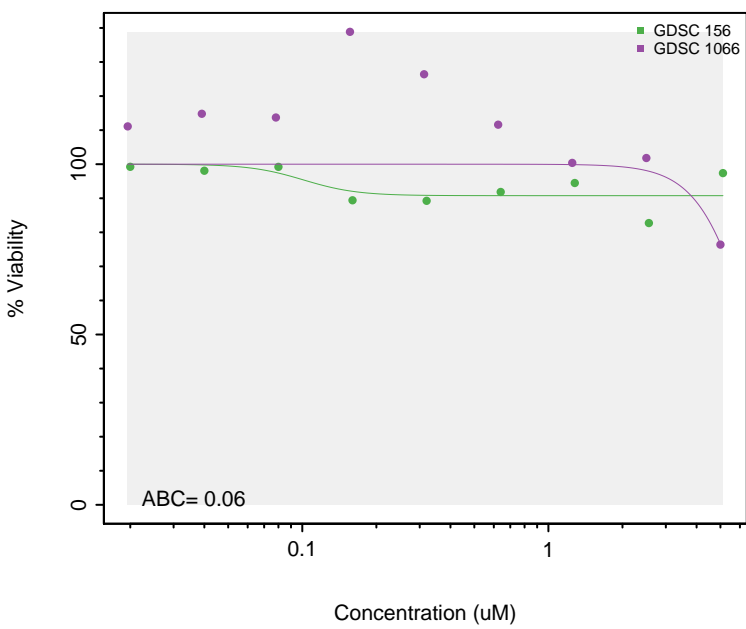

AZD6482:COR-L279

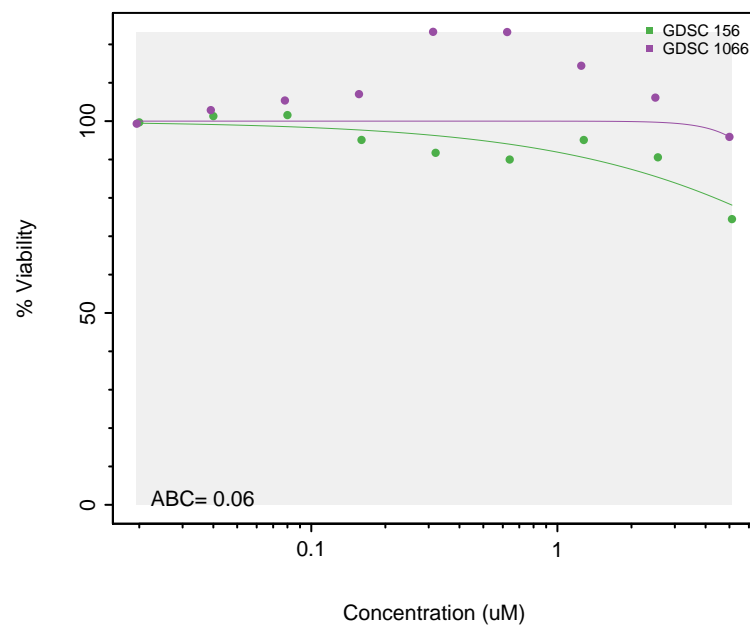

AZD6482:HuH-7

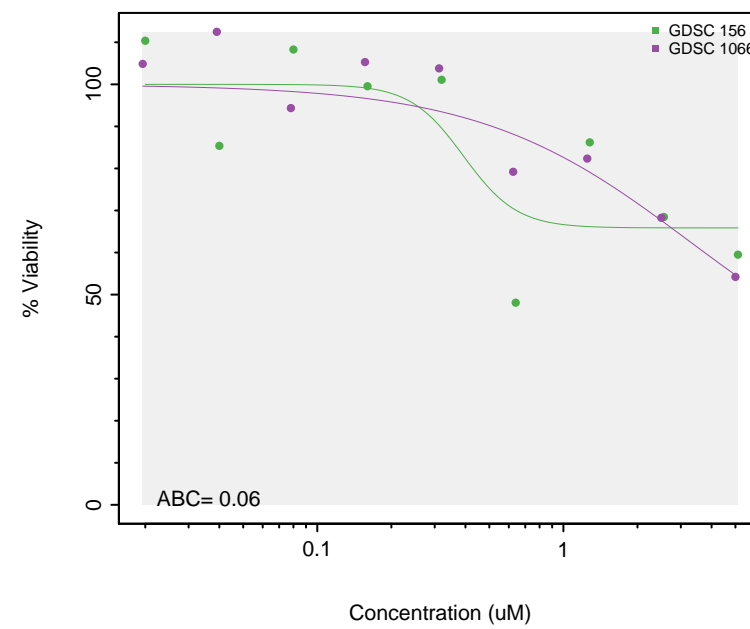

AZD6482:HCC1937

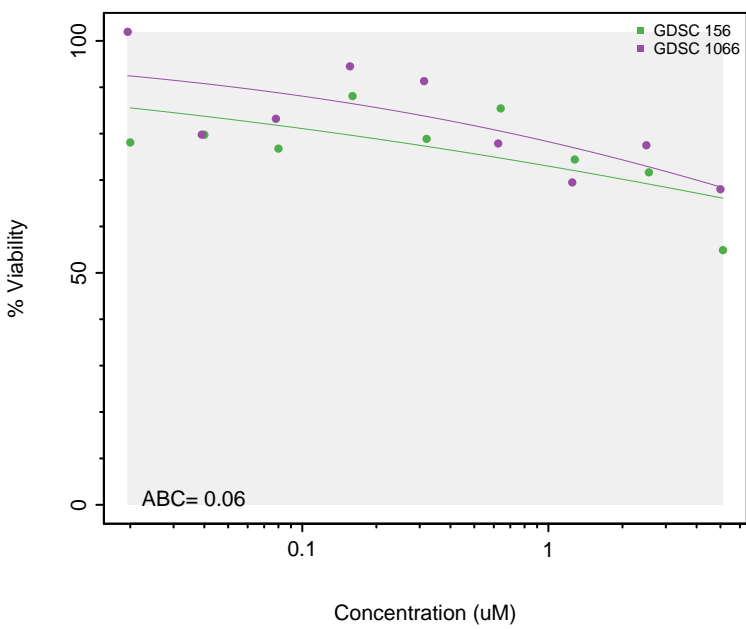

AZD6482:OVCAR-4

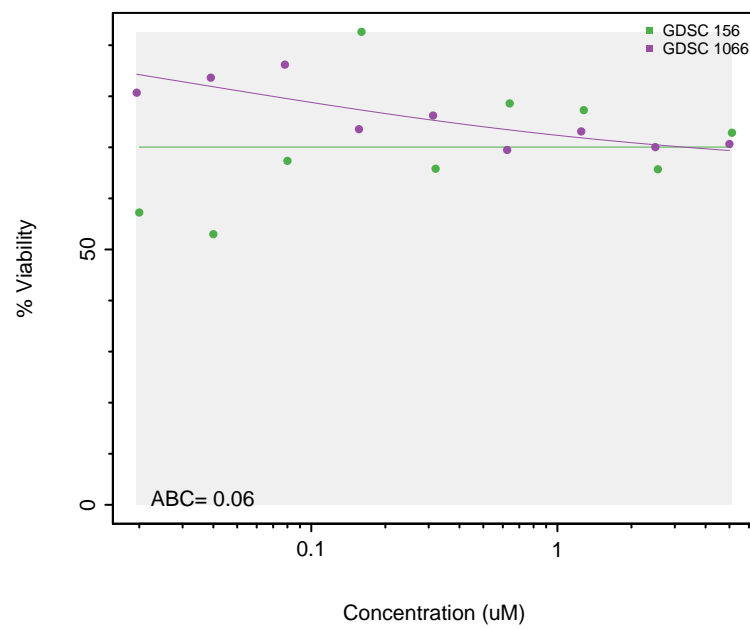

AZD6482:K-562

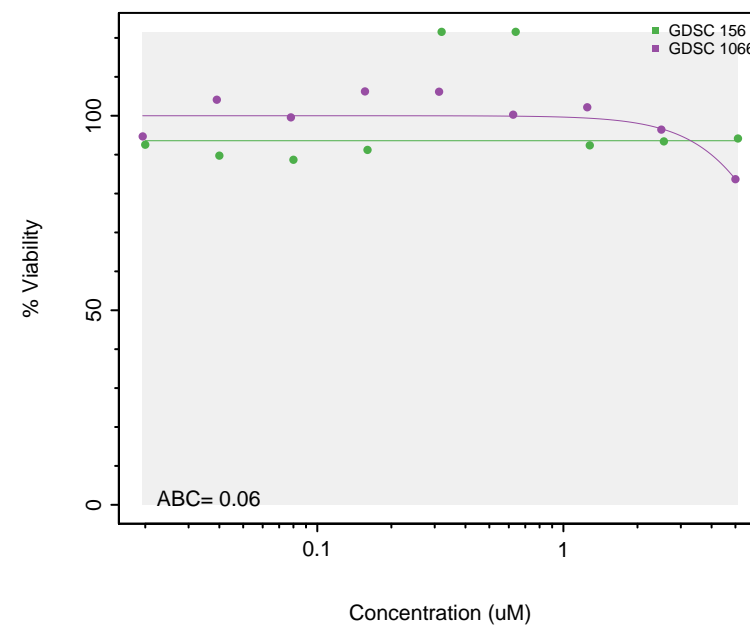

AZD6482:SK-HEP-1

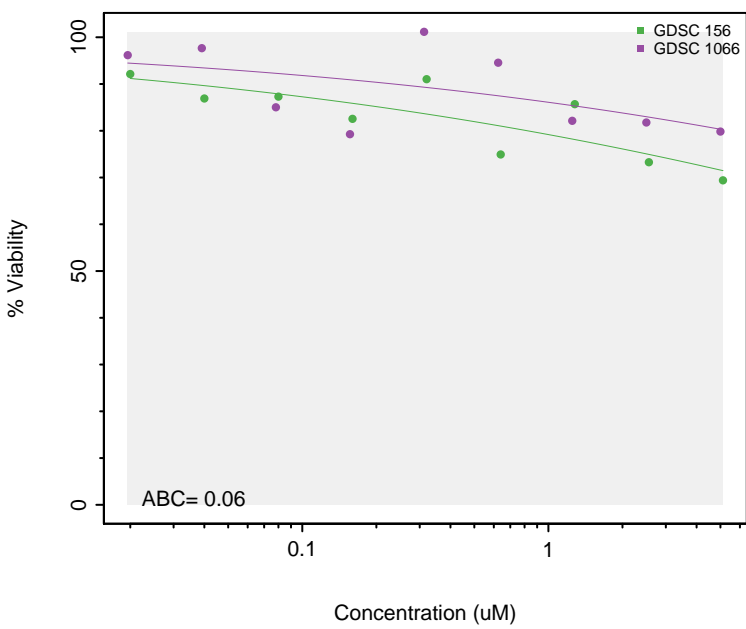

AZD6482:RD

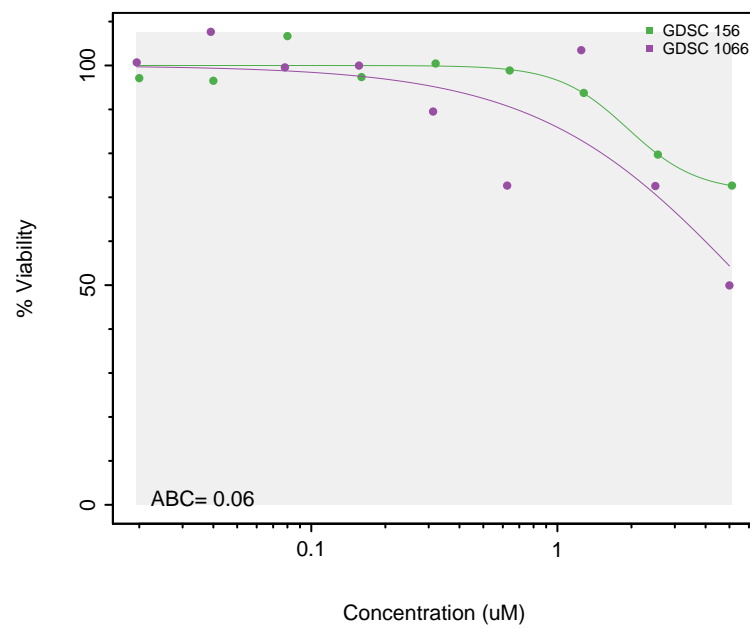

AZD6482:P30-OHK

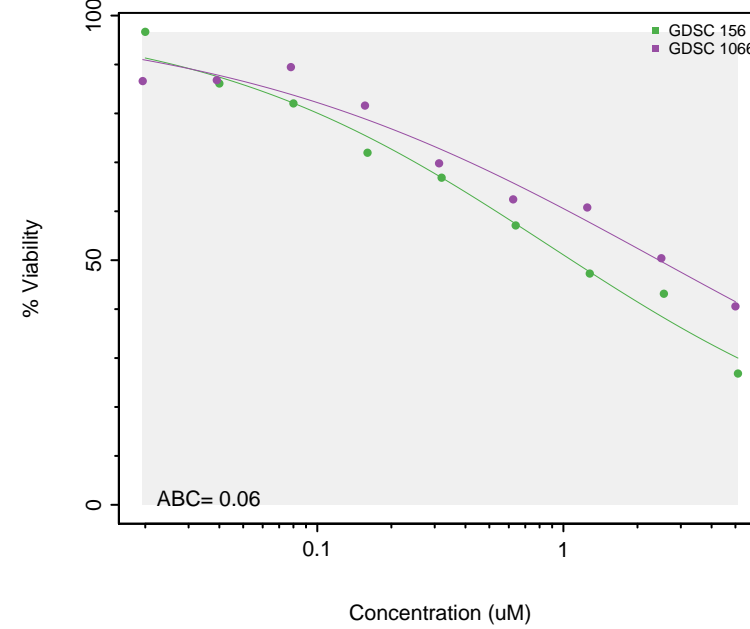

AZD6482:HOP-92

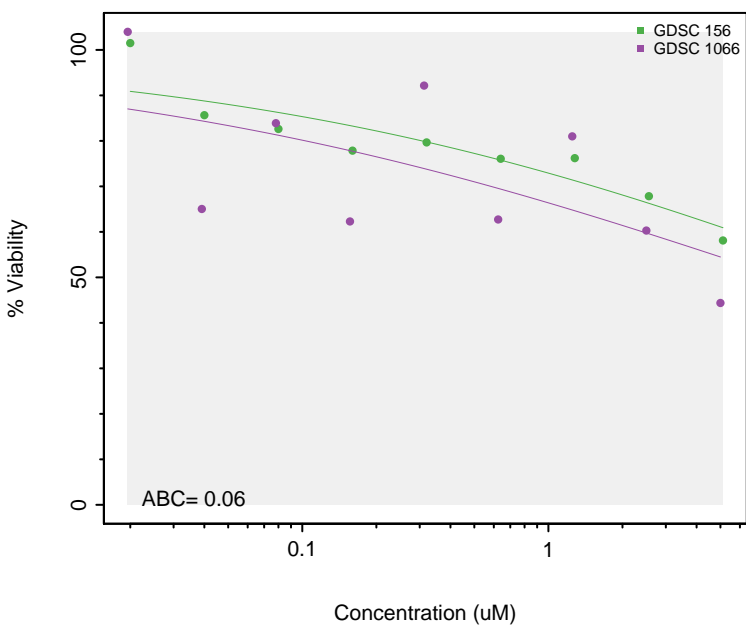

AZD6482:NCI-H28

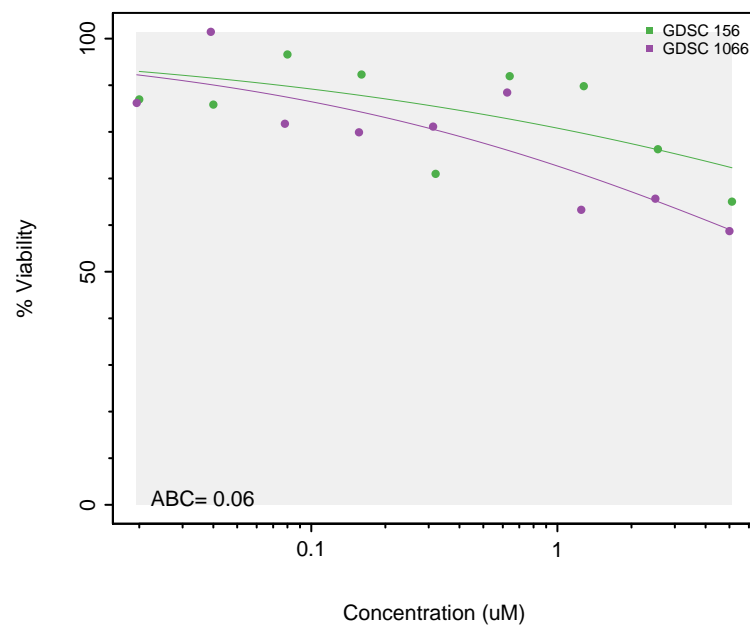

AZD6482:SW780

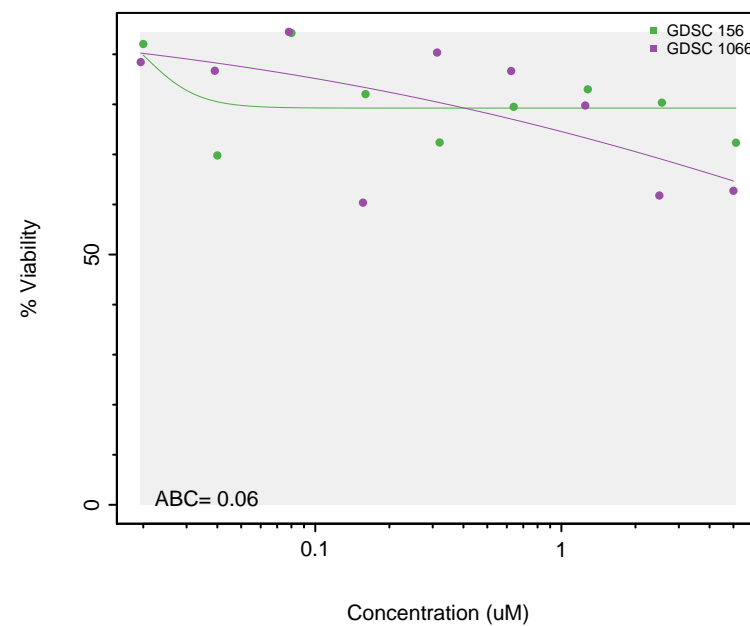

AZD6482:UM-UC-3

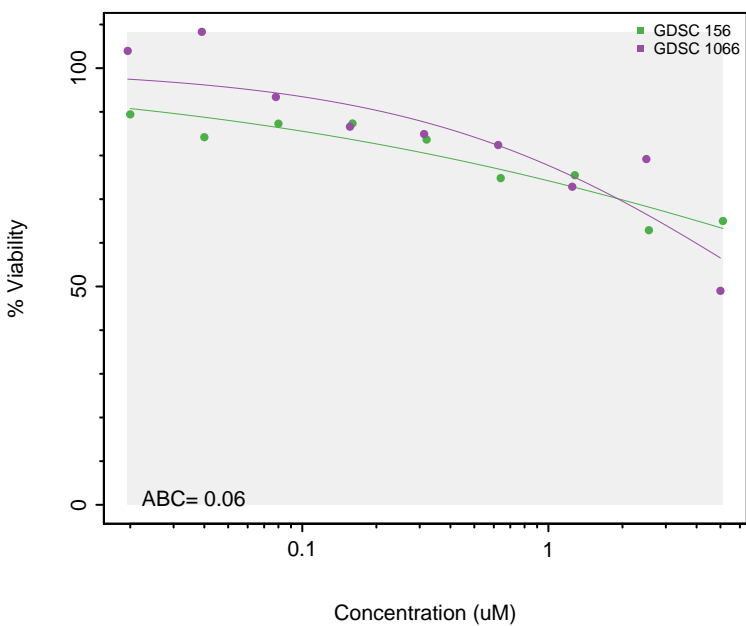

AZD6482:LP-1

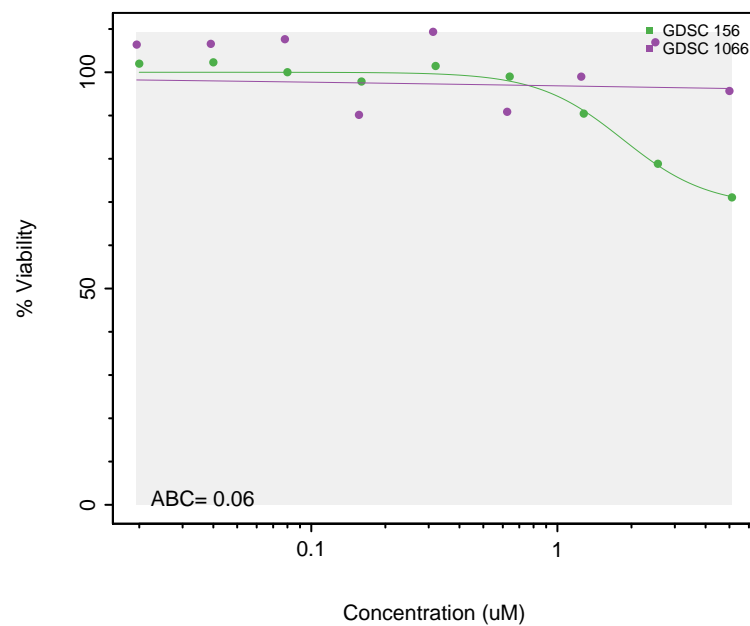

AZD6482:KYSE-150

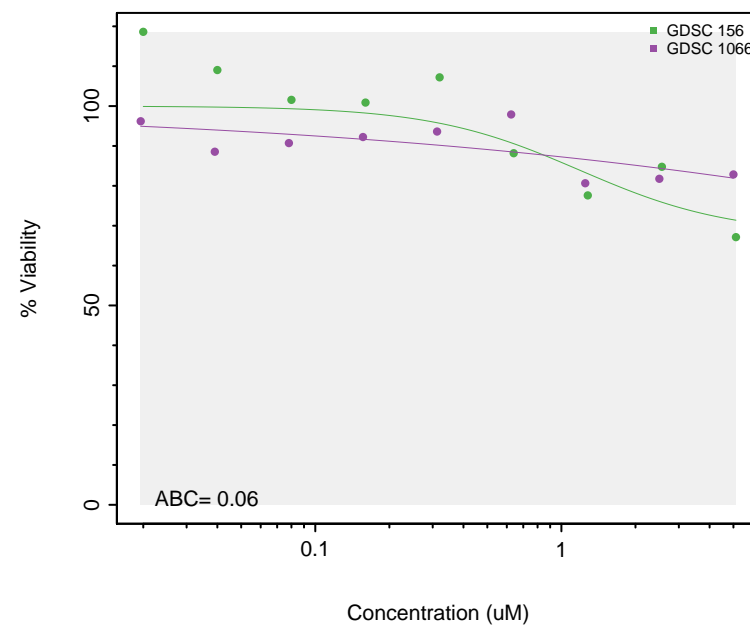

AZD6482:GCT

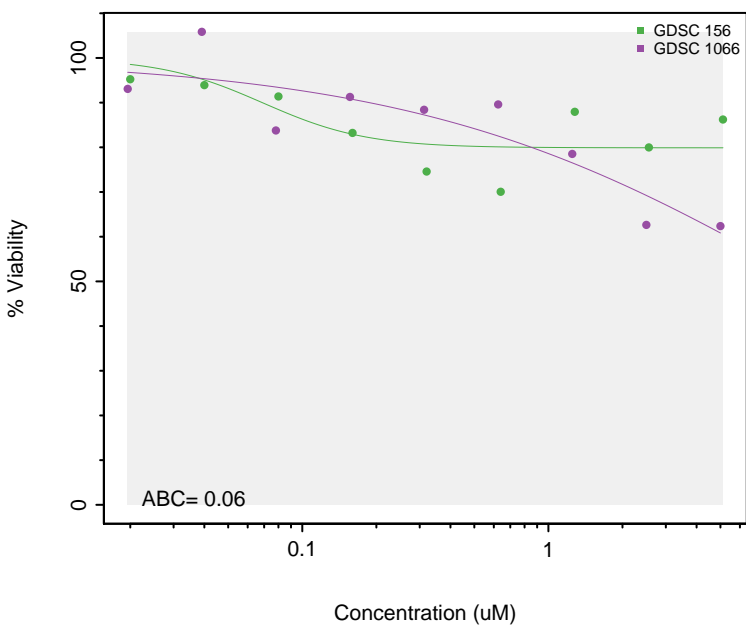

AZD6482:KM-H2

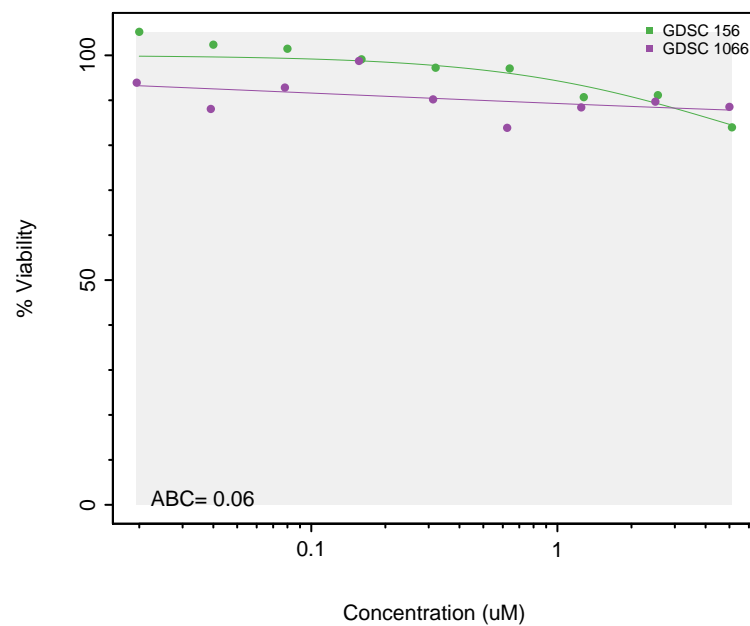

AZD6482:A388

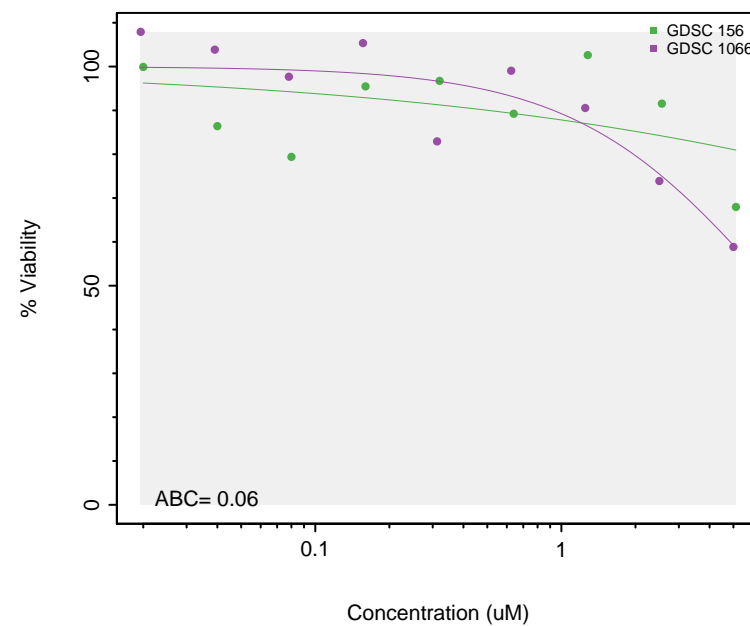

AZD6482:HUTU-80

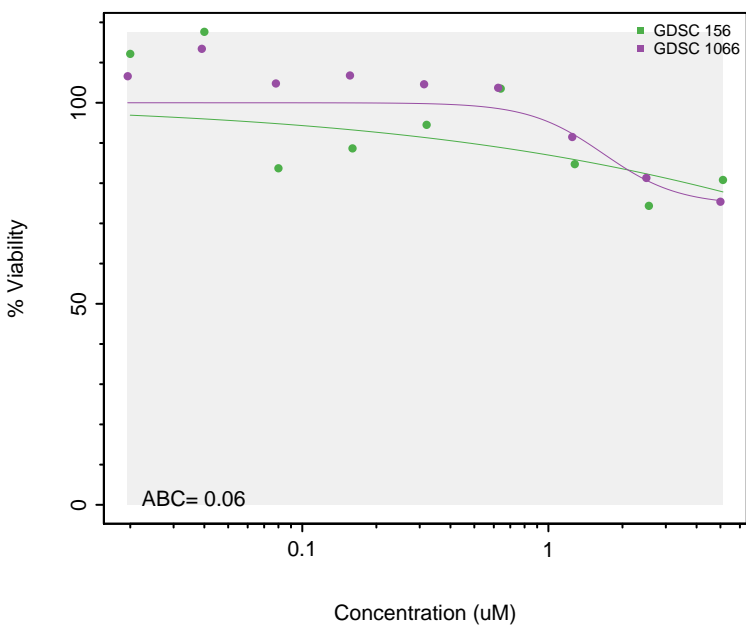

AZD6482:HT

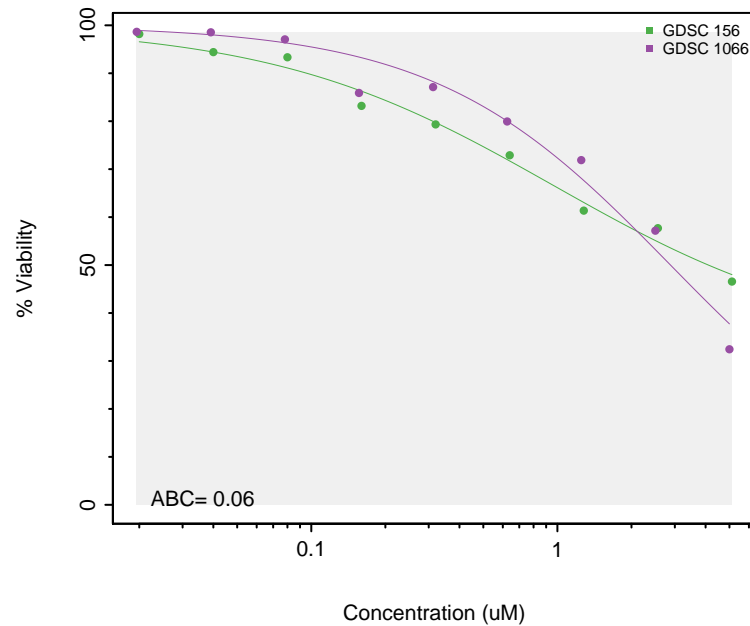

AZD6482:ES5

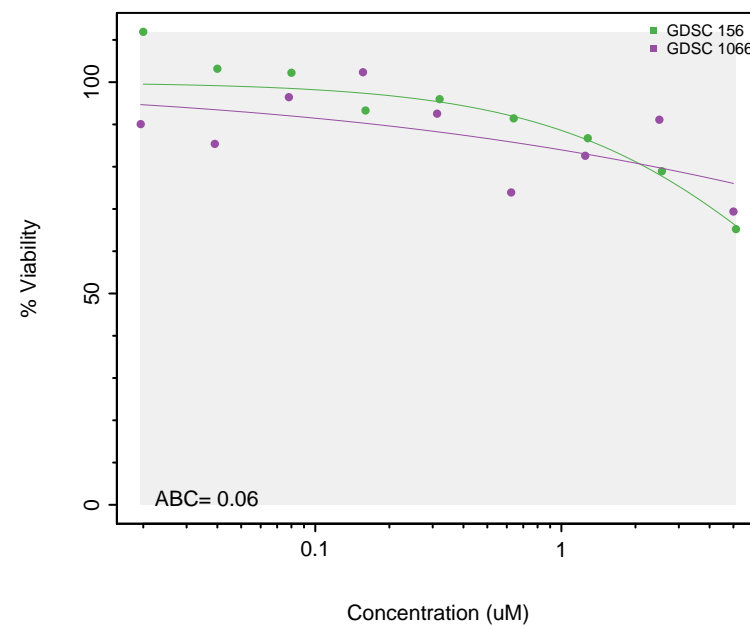

AZD6482:ABC-1

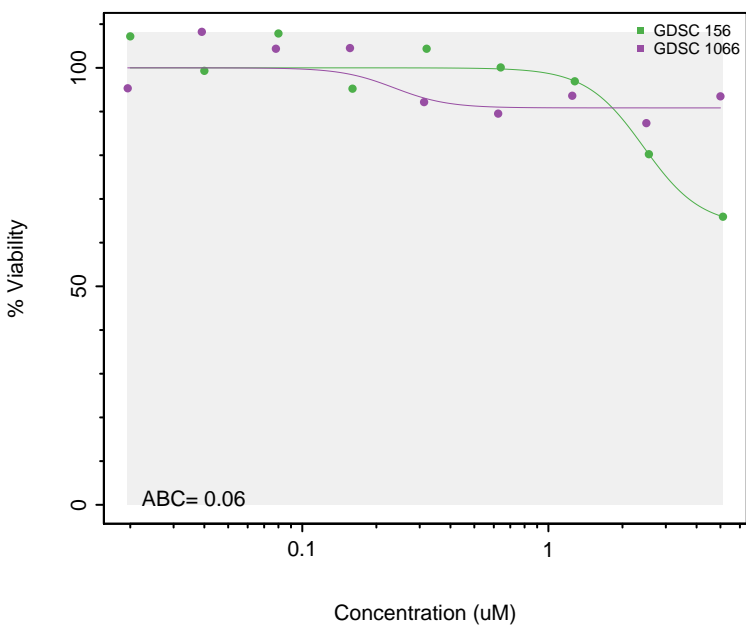

AZD6482:ES4

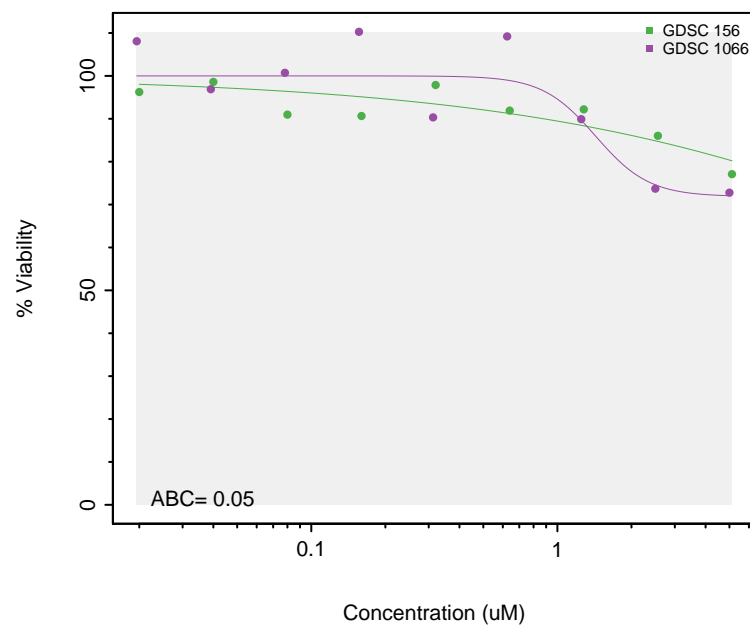

AZD6482:NCI-H2170

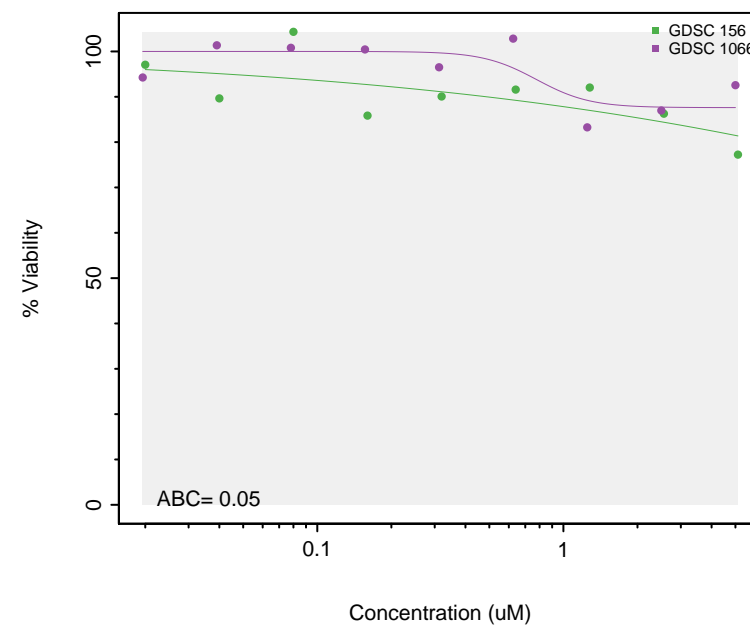

AZD6482:EM-2

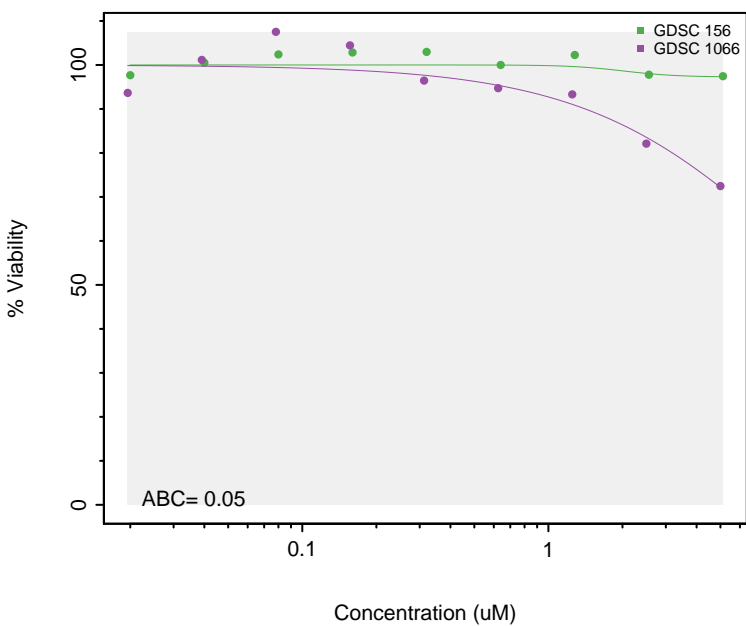

AZD6482:LB771-HNC

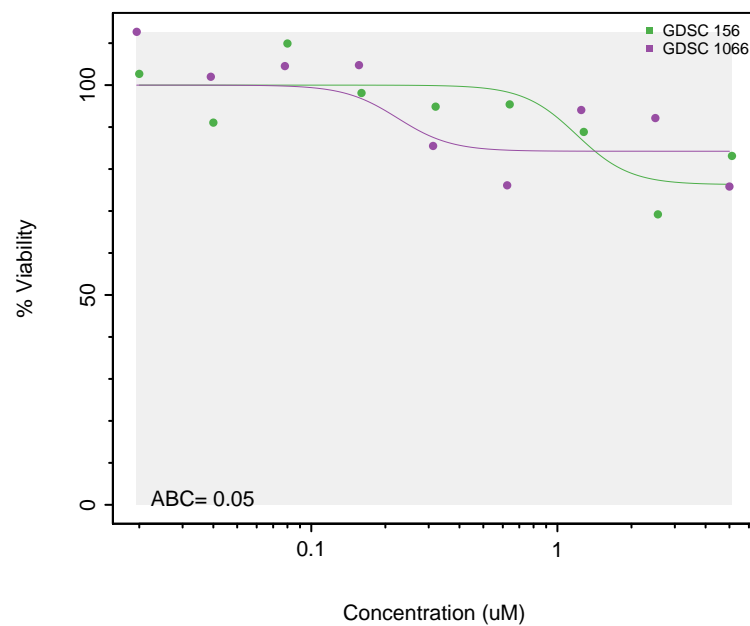

AZD6482:SW620

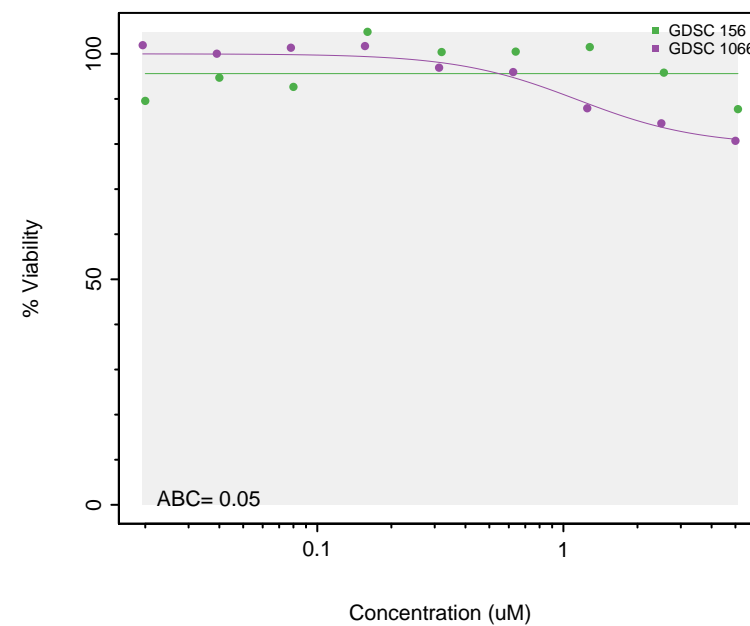

AZD6482:GMS-10

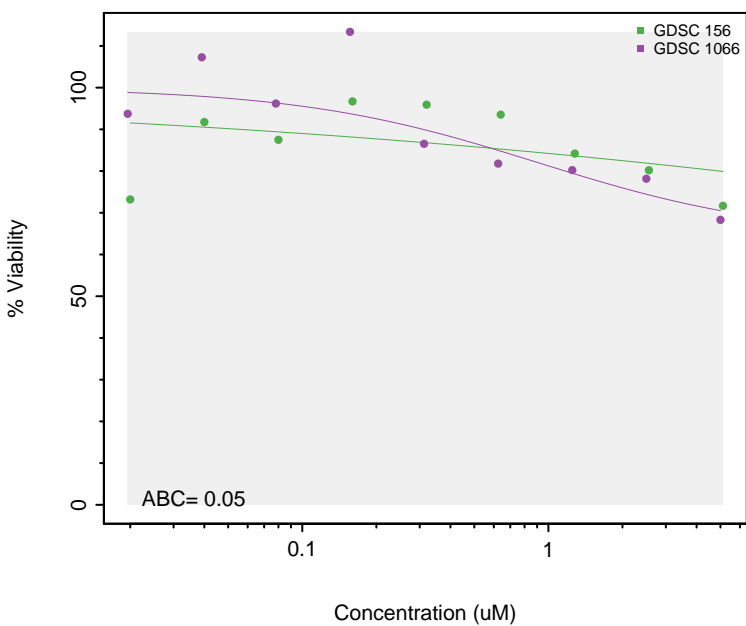

AZD6482:HCC2218

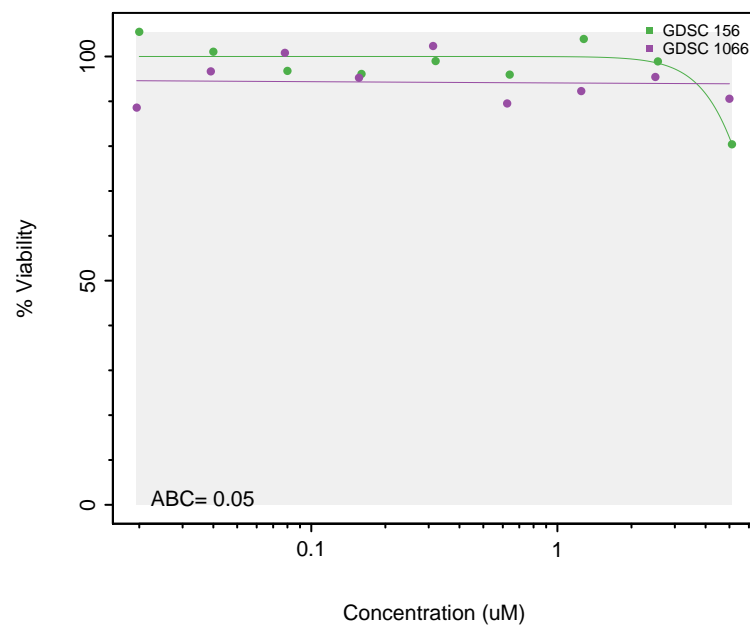

AZD6482:HDLM-2

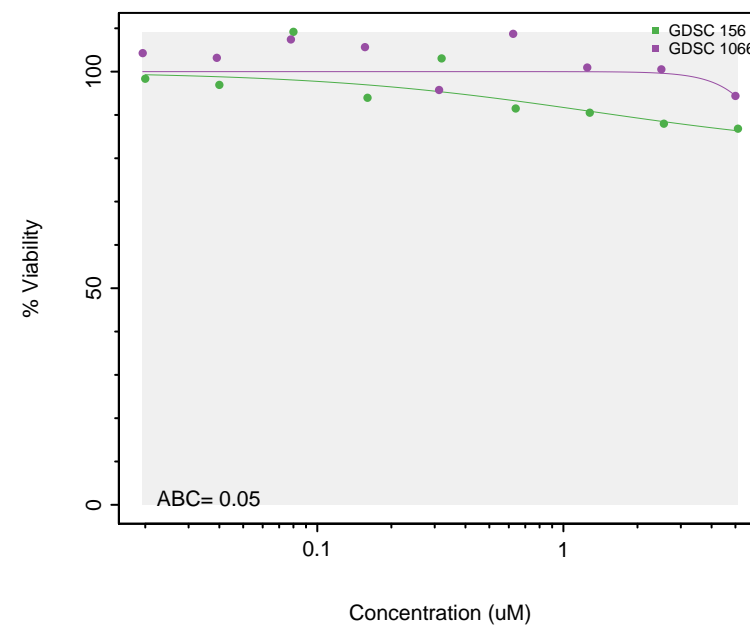

AZD6482:SK-MEL-3

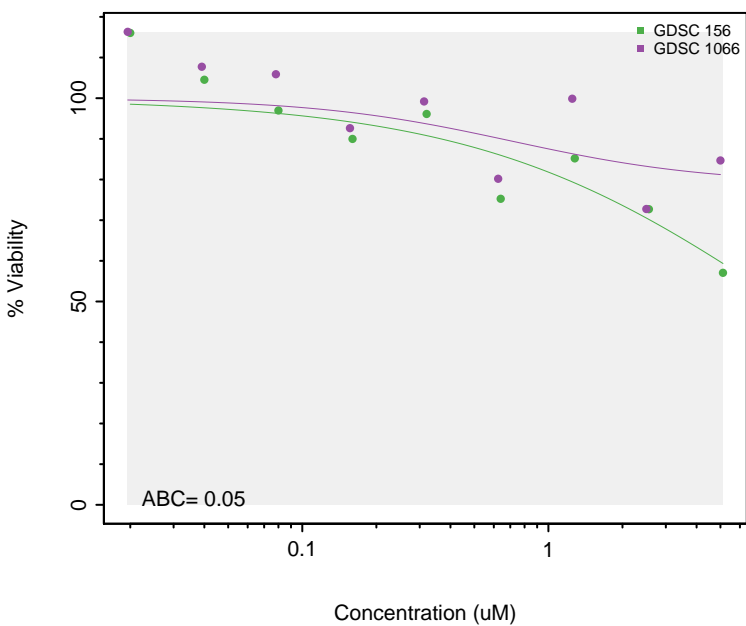

AZD6482:HT-1376

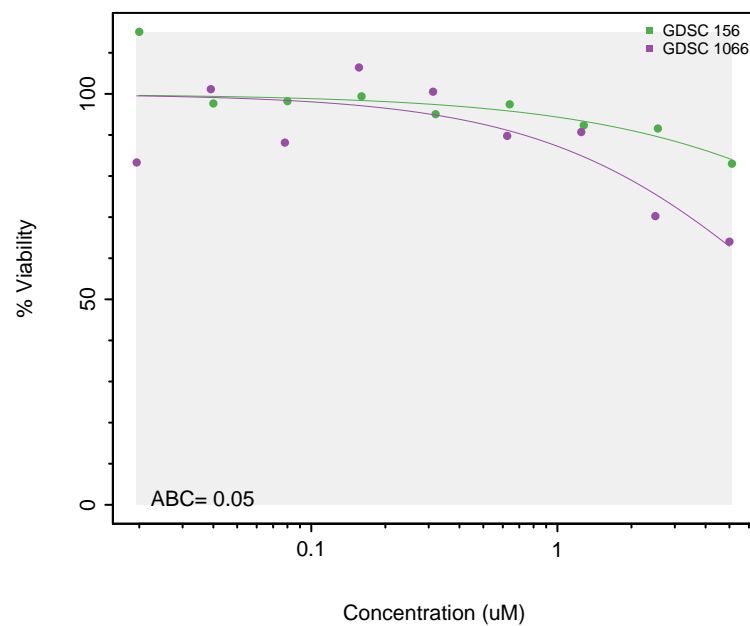

AZD6482:NCI-H1651

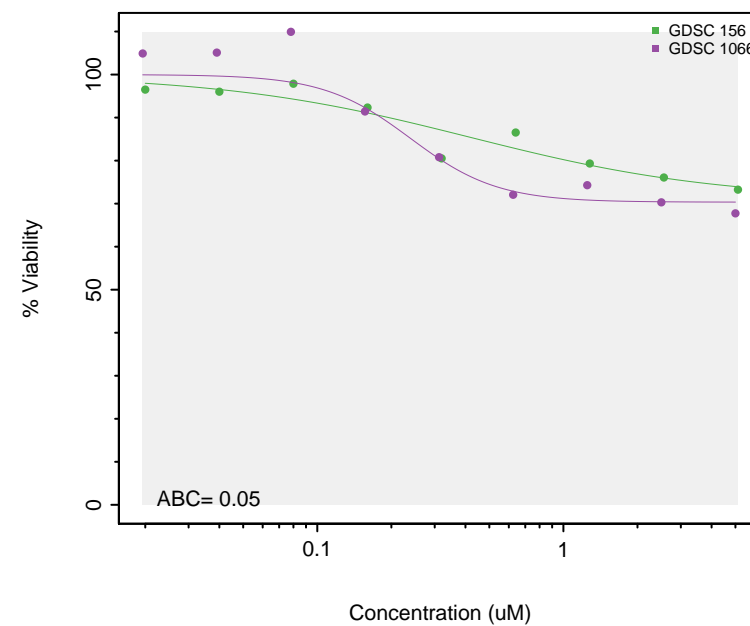

AZD6482:DEL

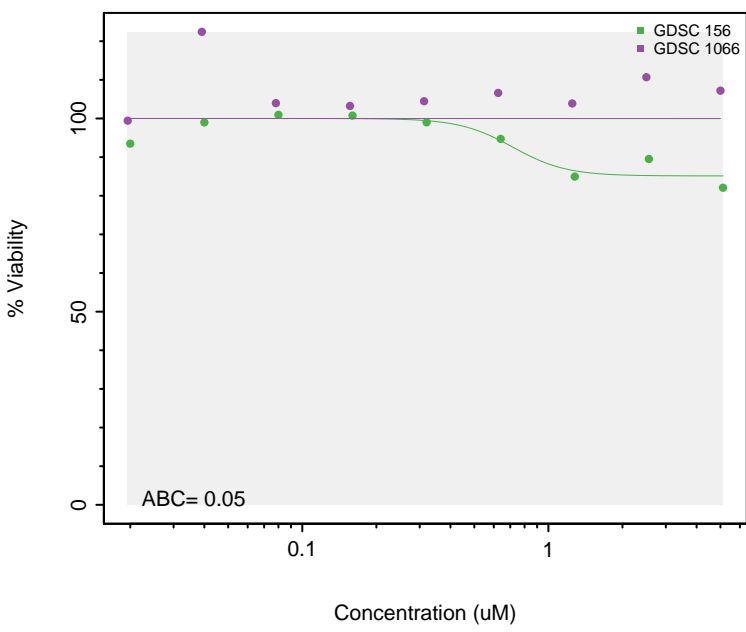

AZD6482:COLO-678

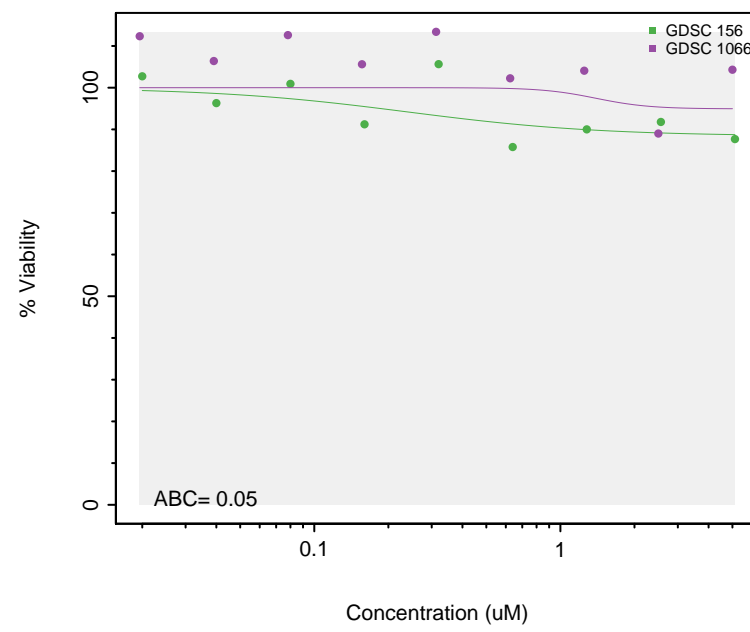

AZD6482:HCC2998

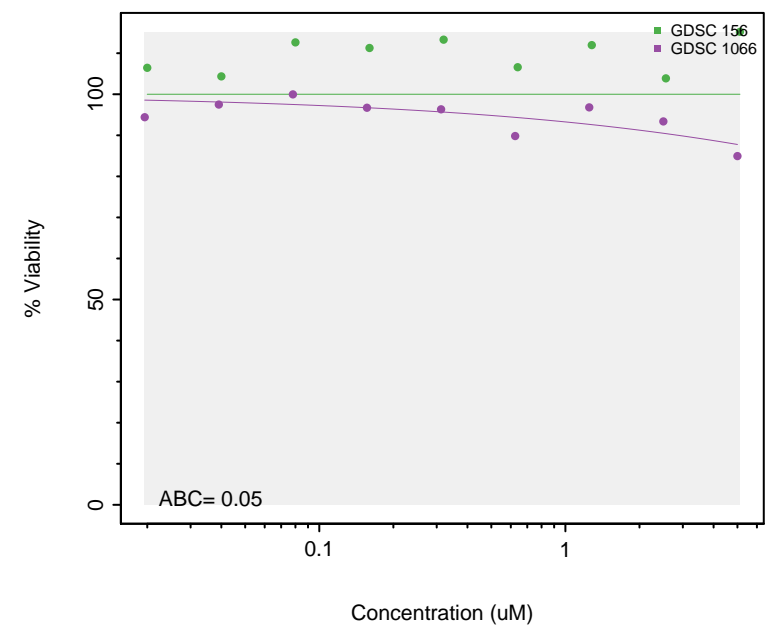

AZD6482:LAN-6

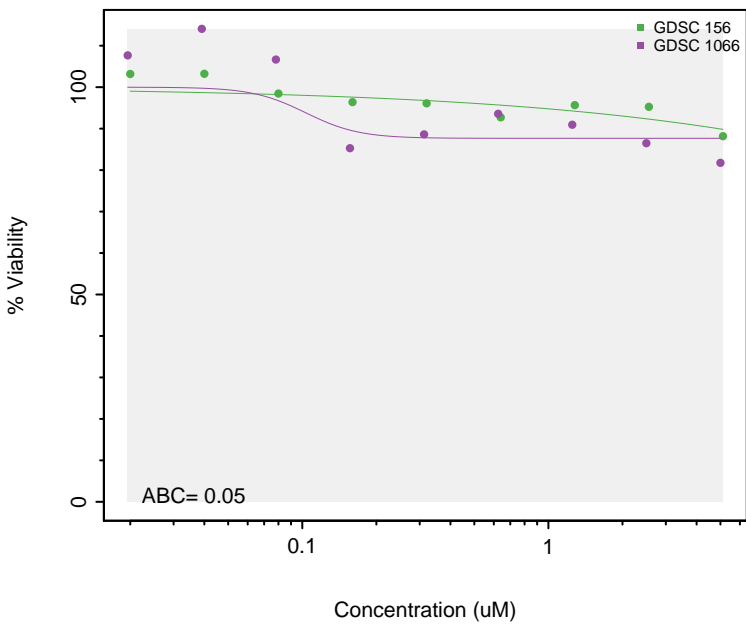

AZD6482:YT

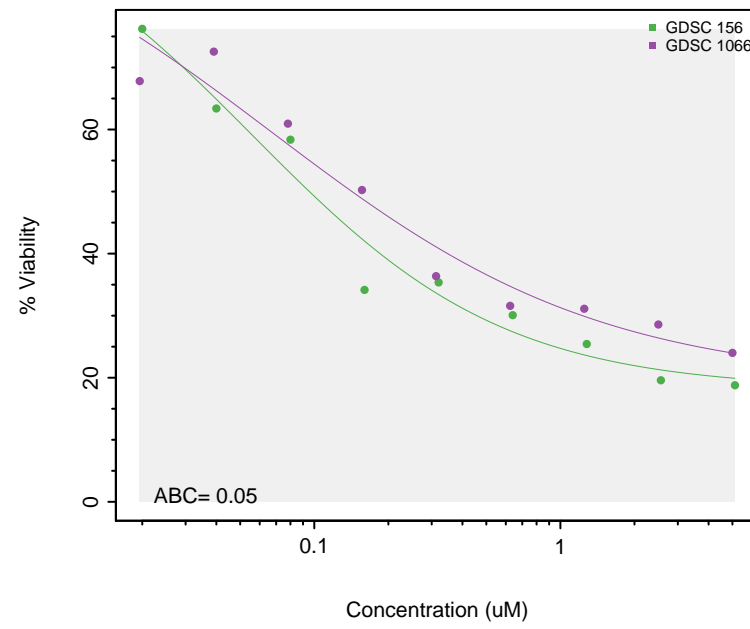

AZD6482:SW756

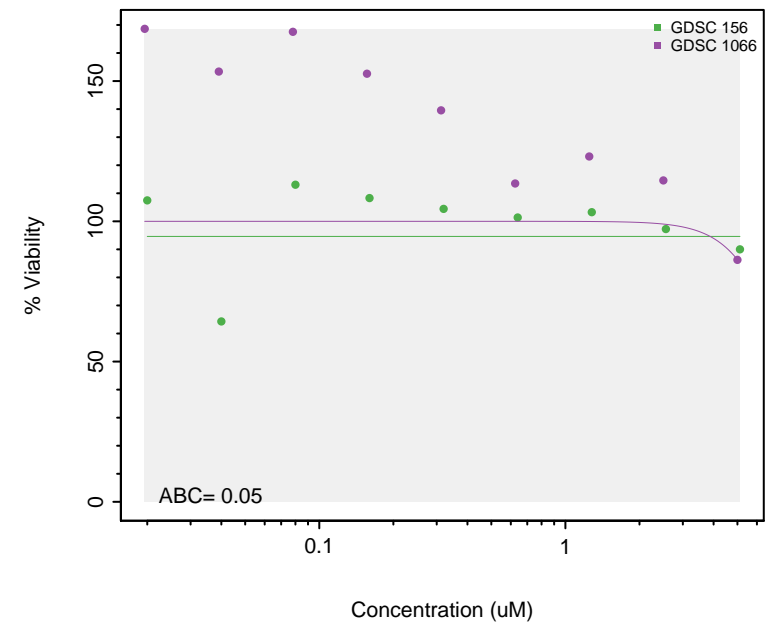

AZD6482:A172

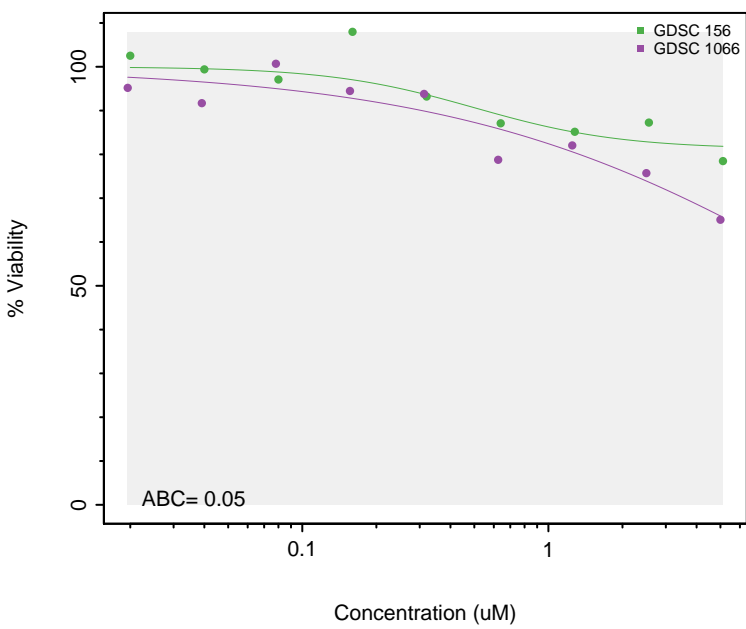

AZD6482:QIMR-WIL

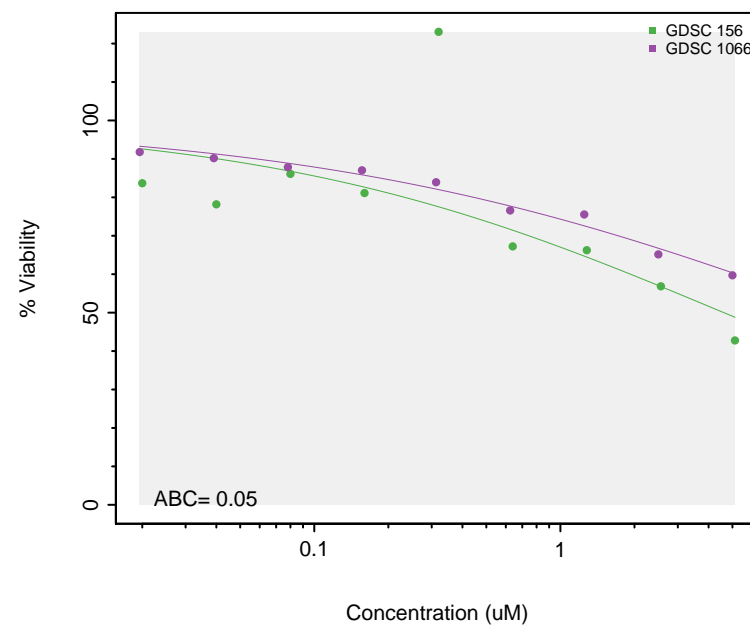

AZD6482:ES3

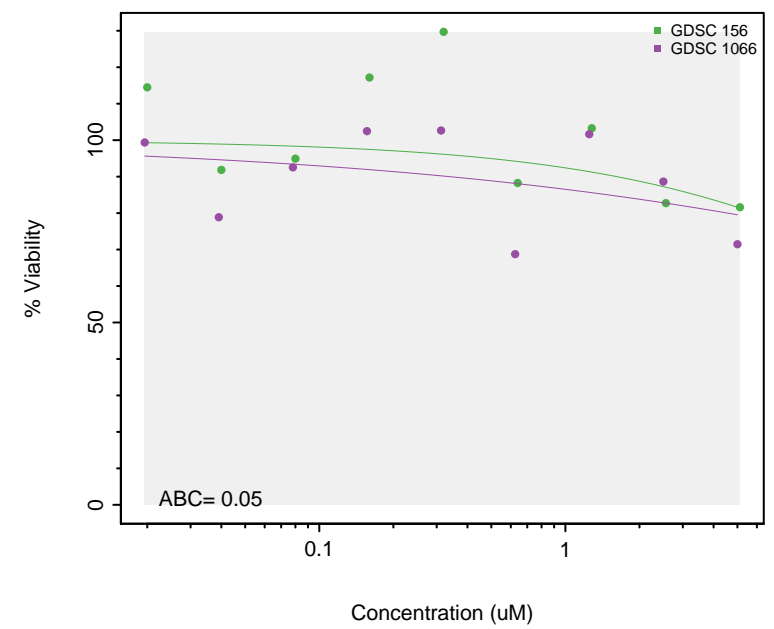

AZD6482:COR-L105

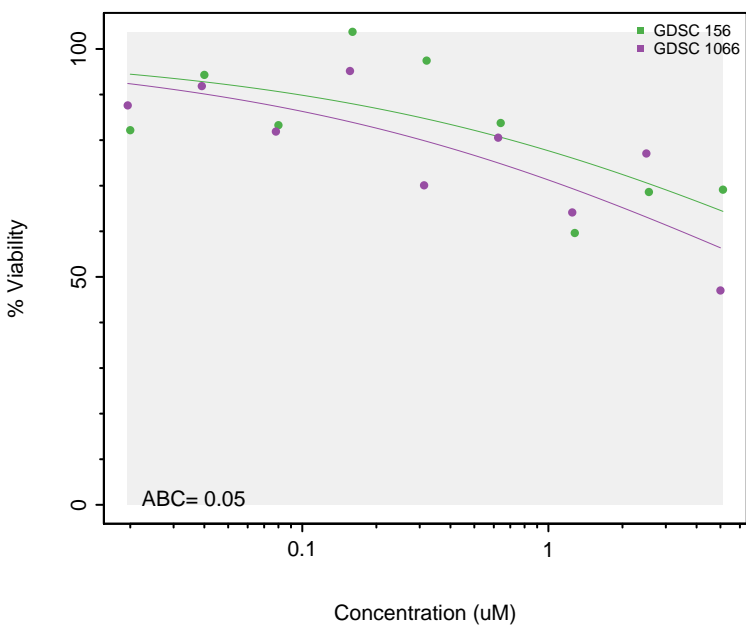

AZD6482:P12-ICHIKAWA

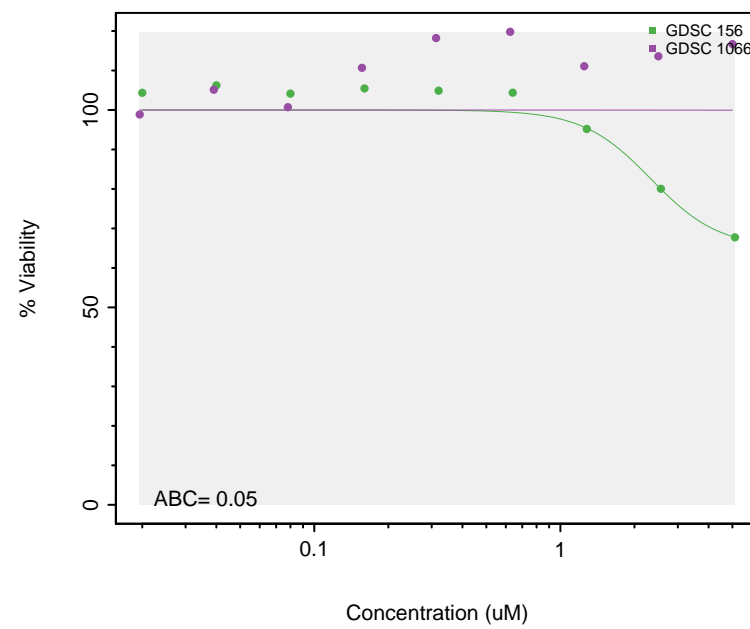

AZD6482:TGW

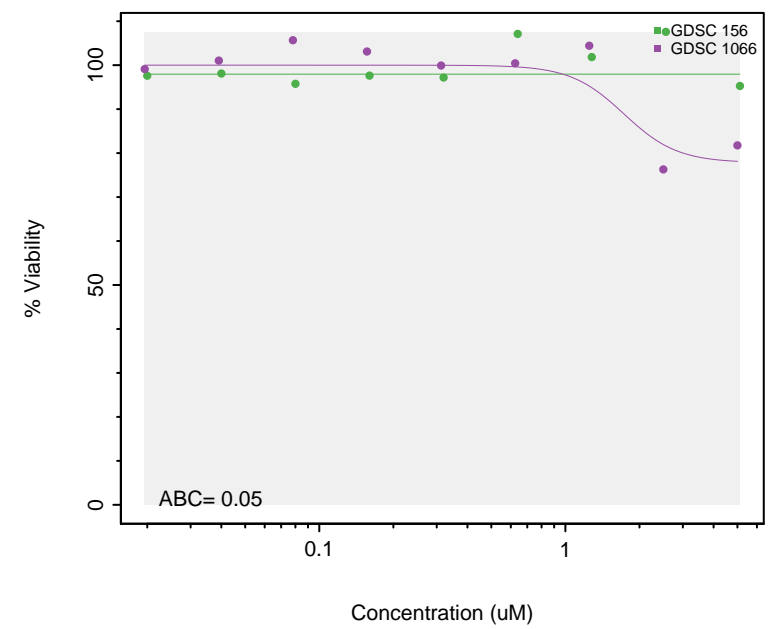

AZD6482:SIMA

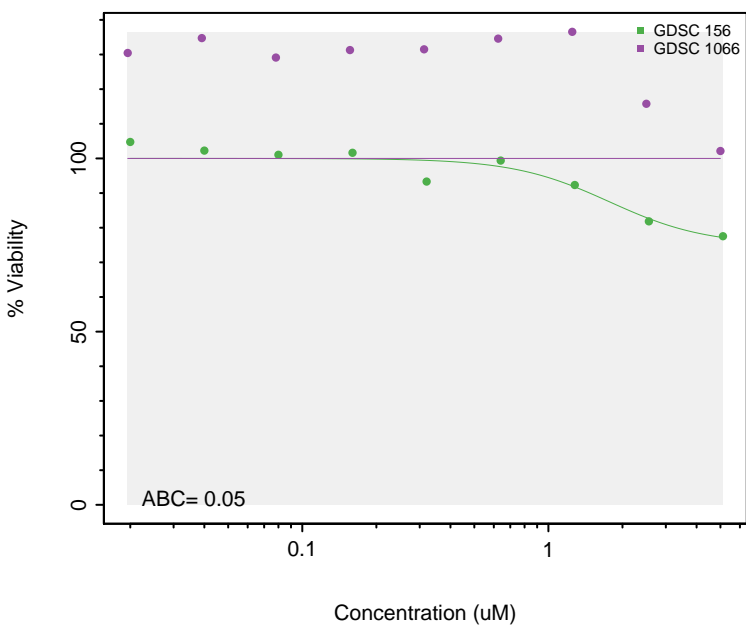

AZD6482:SW837

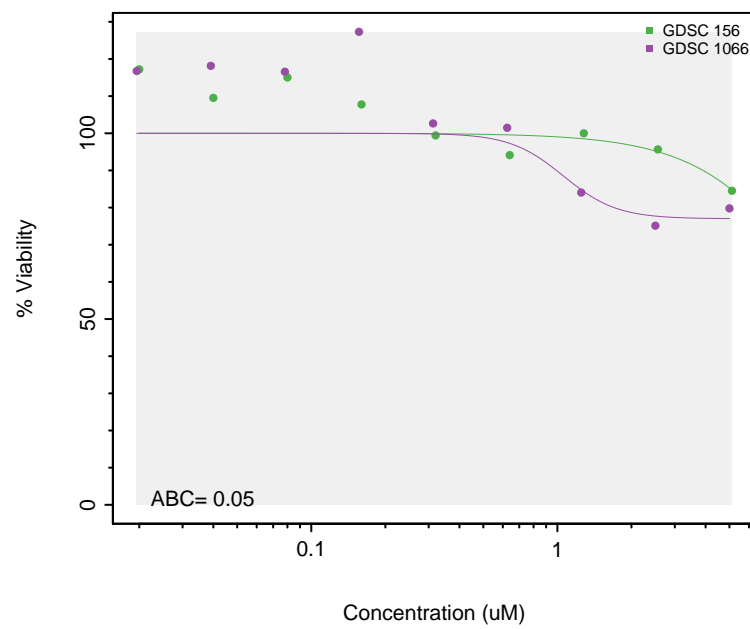

AZD6482:LOUCY

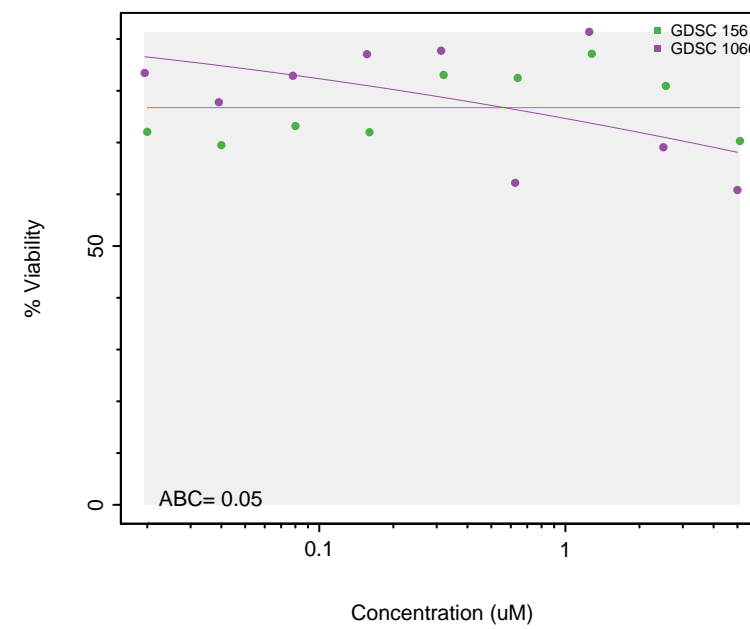

AZD6482:S-117

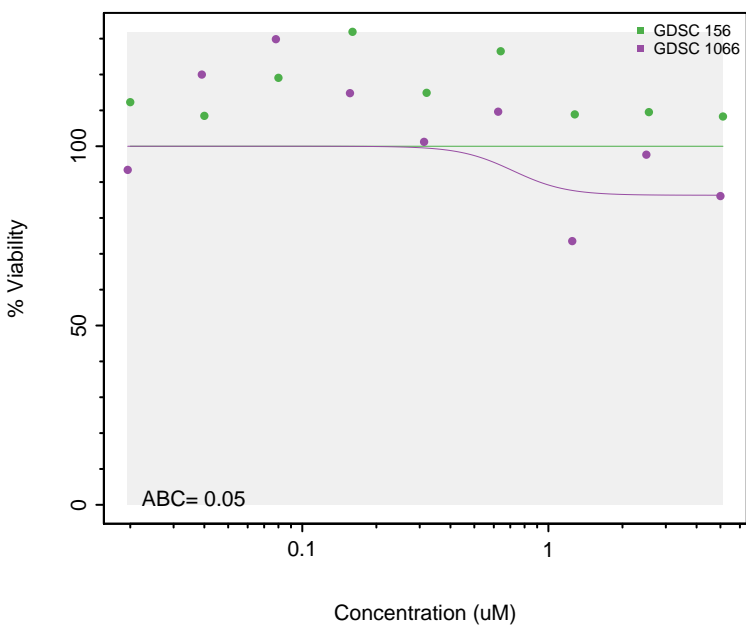

AZD6482:CCRF-CEM

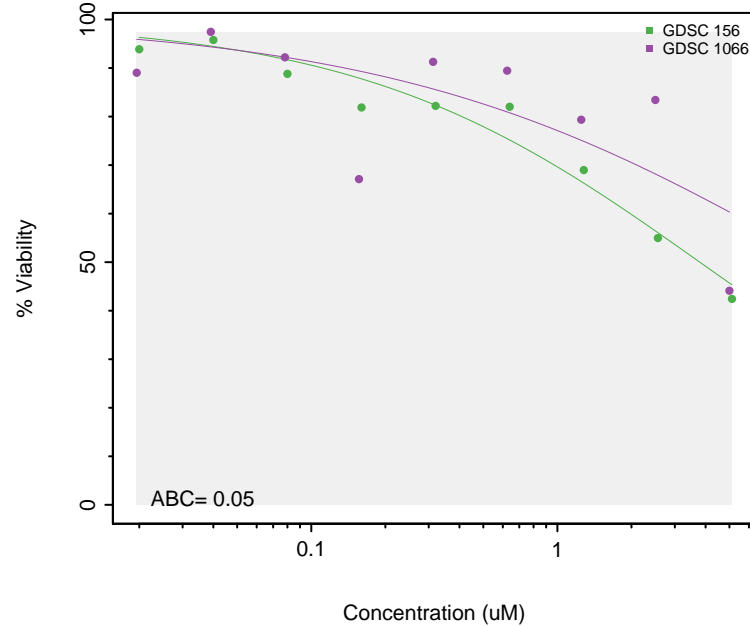

AZD6482:NB69

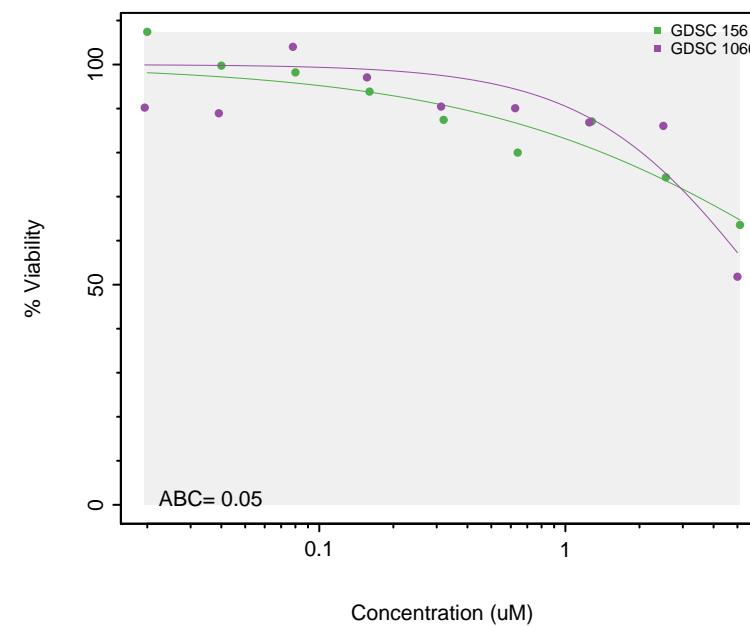

AZD6482:M059J

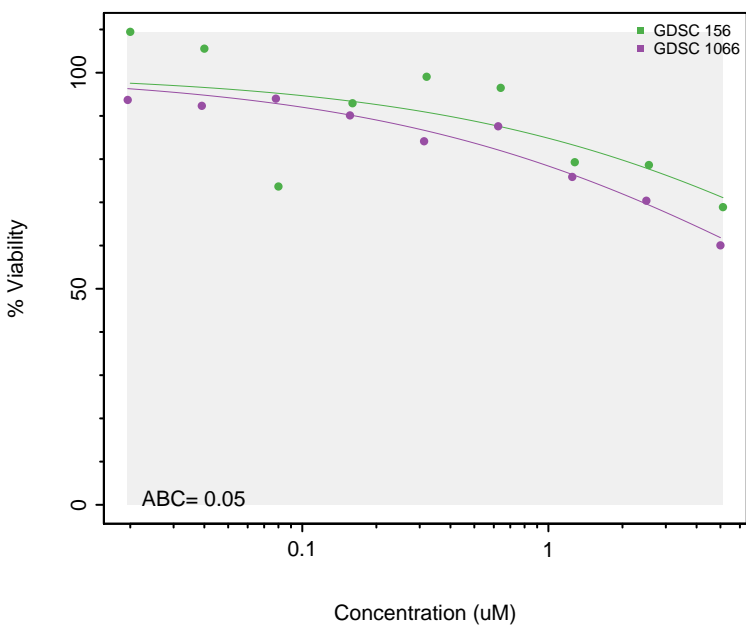

AZD6482:KYSE-410

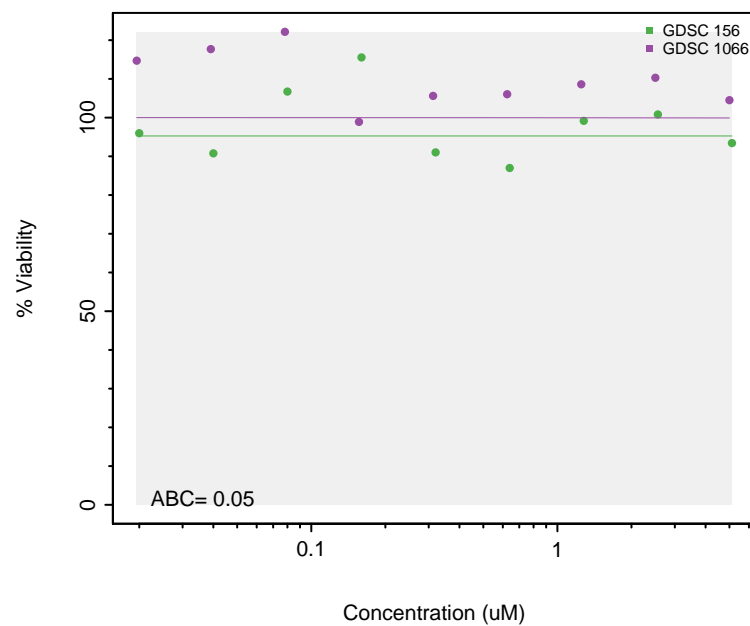

AZD6482:UMC-11

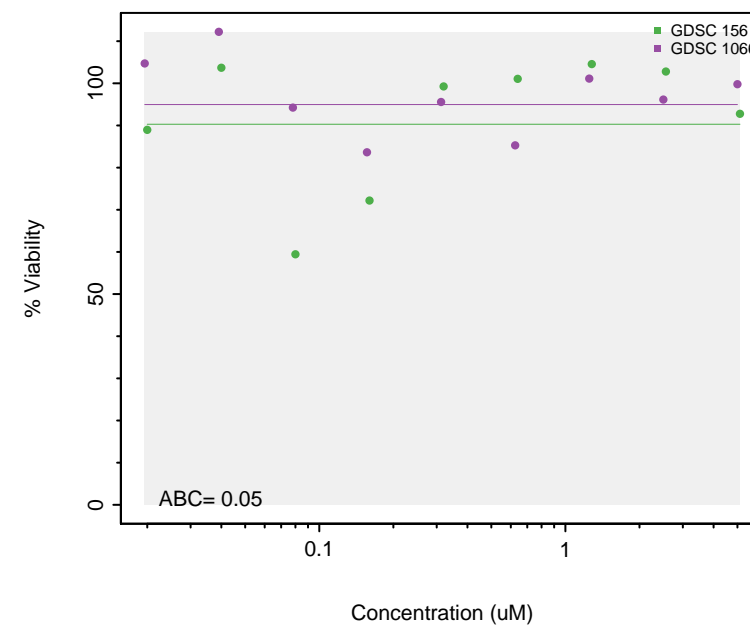

AZD6482:BEN

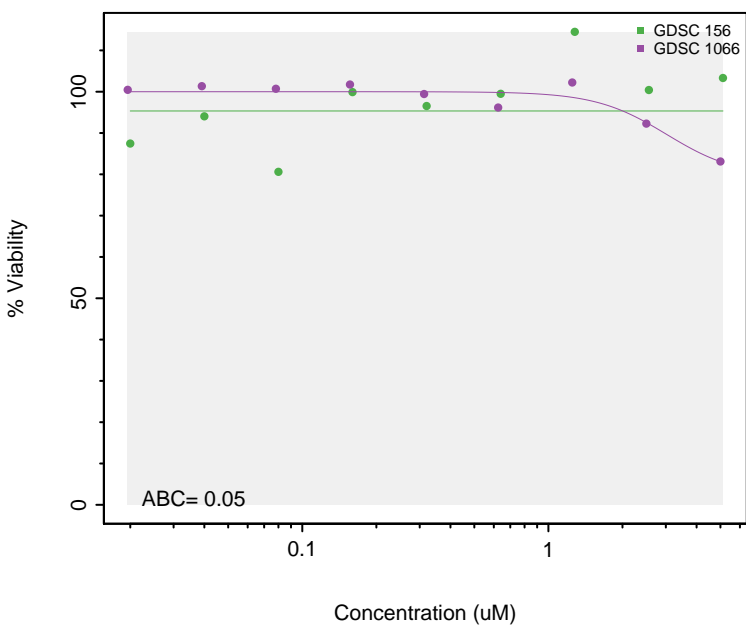

AZD6482:U-698-M

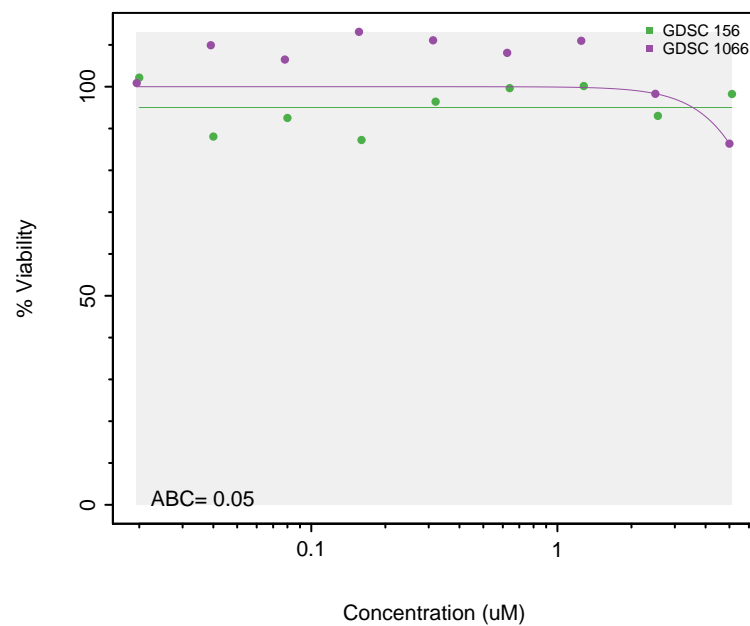

AZD6482:SCC-15

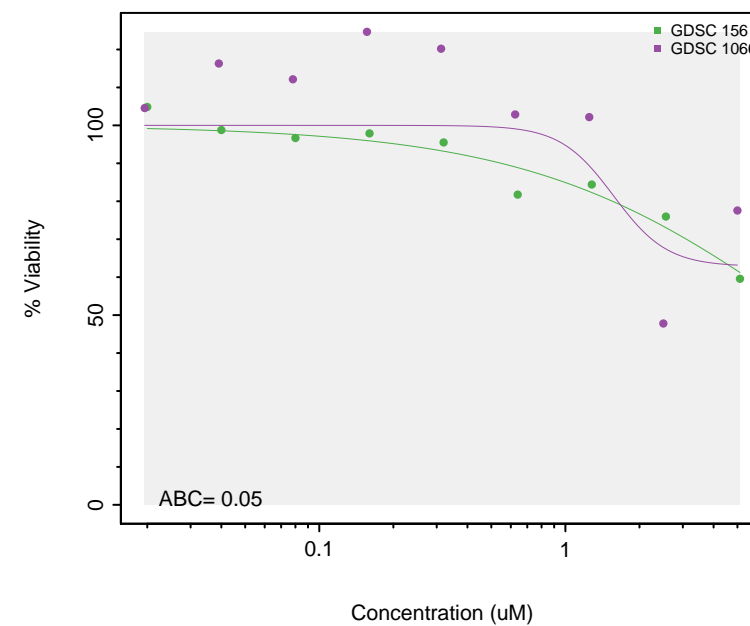

AZD6482:YAPC

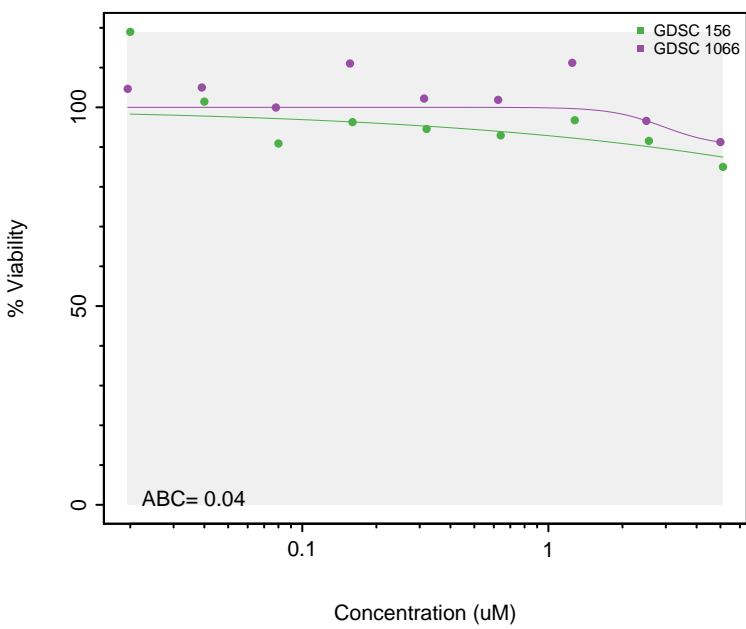

AZD6482:SF539

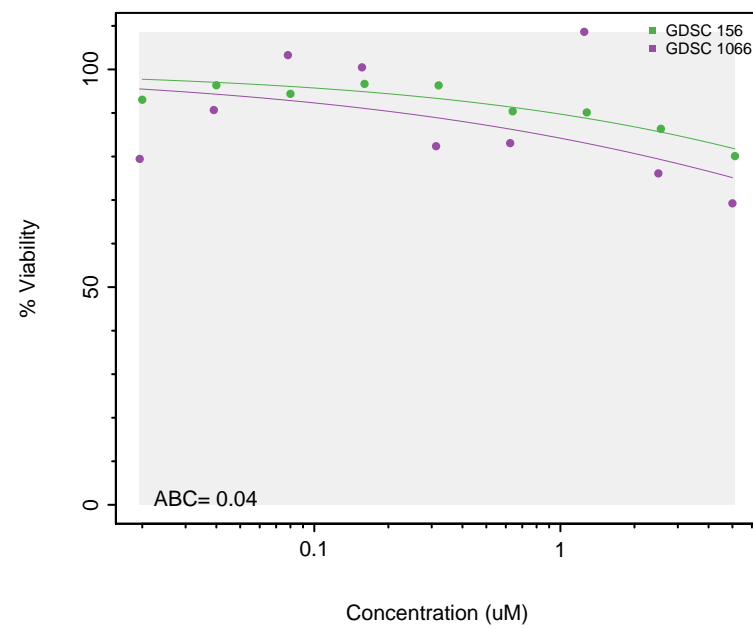

AZD6482:D-392MG

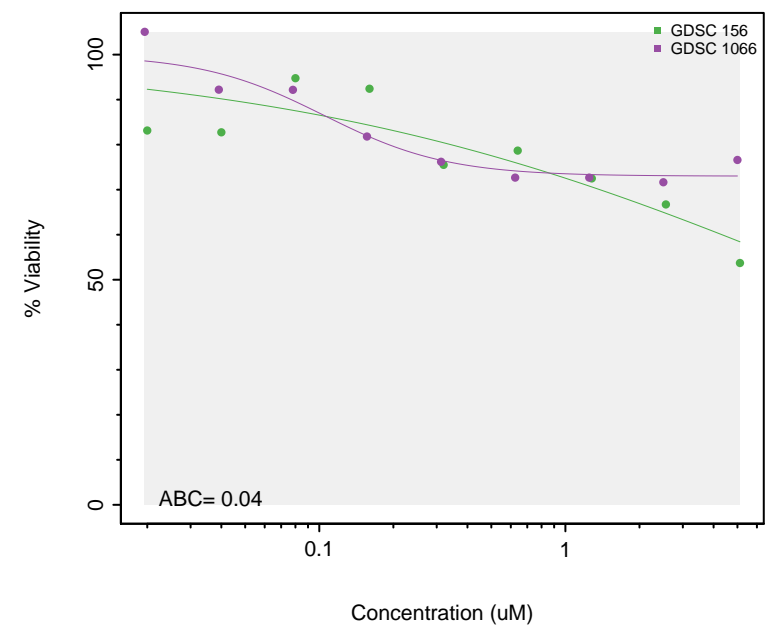

AZD6482:OAW-28

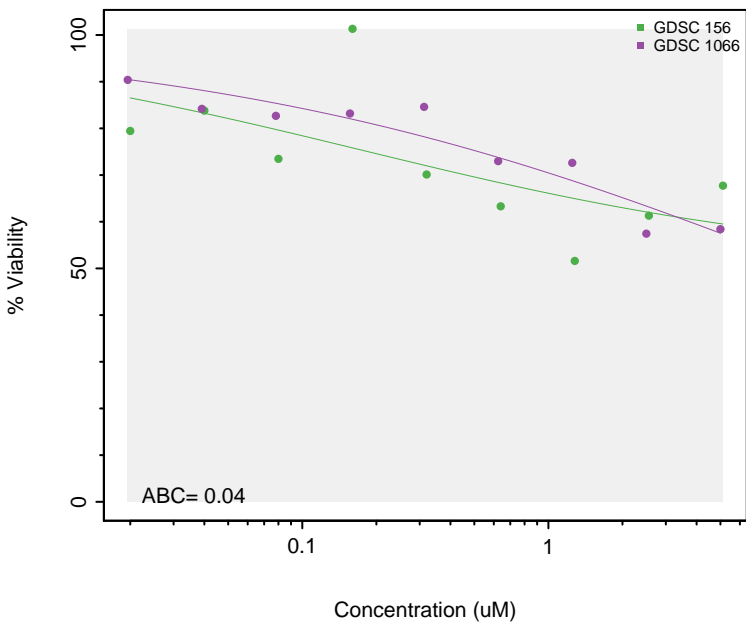

AZD6482:A3-KAW

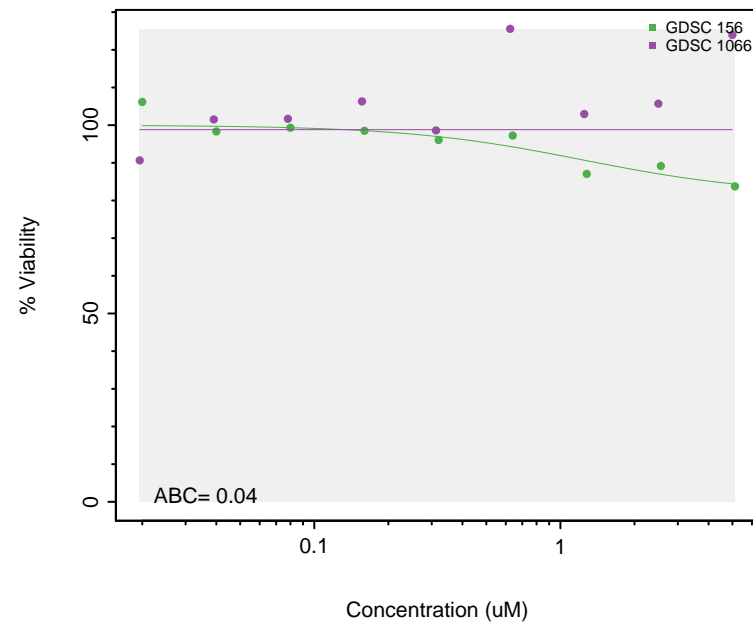

AZD6482:SW48

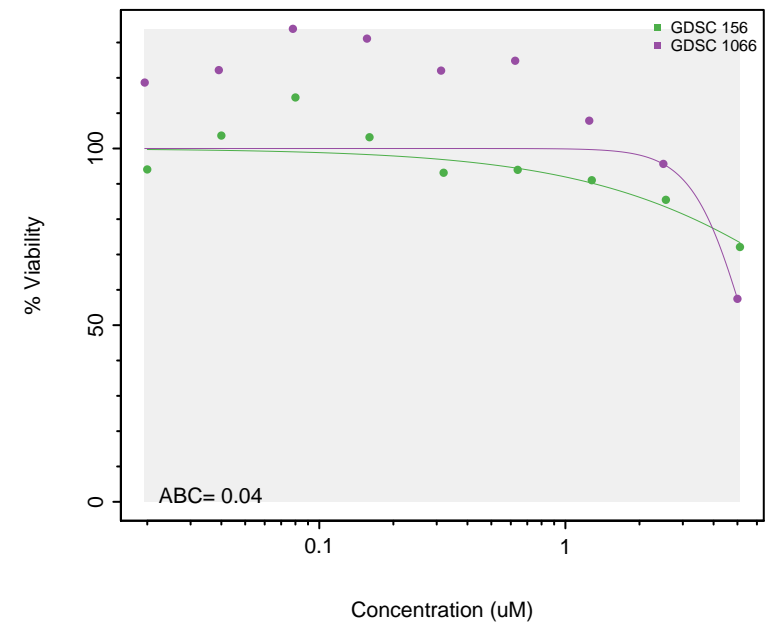

AZD6482:NCI-H1437

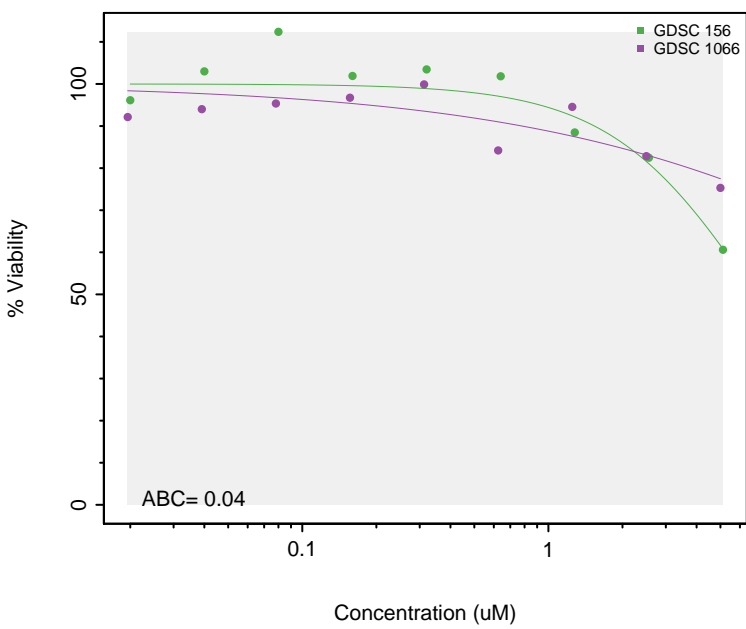

AZD6482:NCI-SNU-1

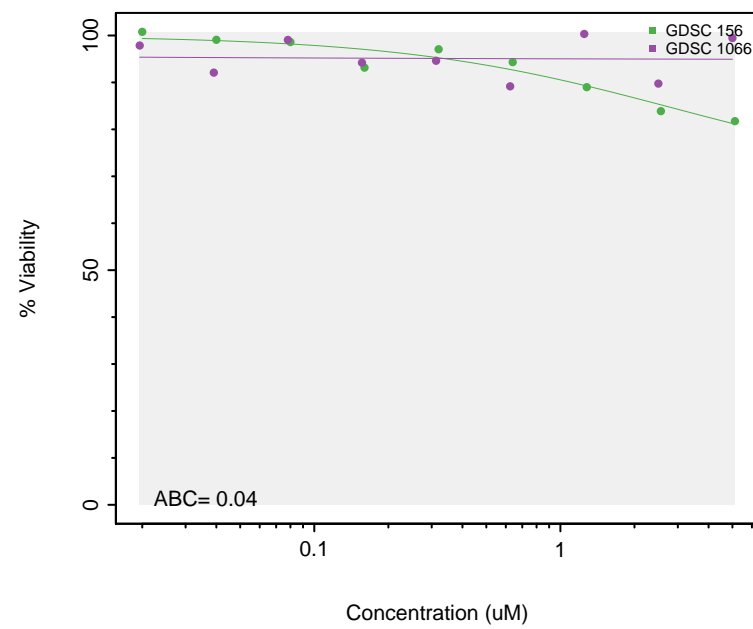

AZD6482:SKG-IIIa

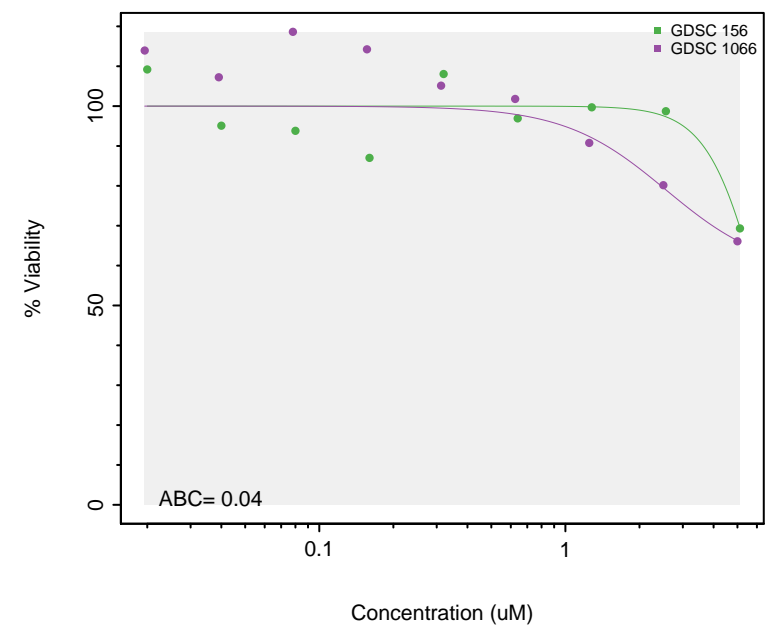

AZD6482:BB30-HNC

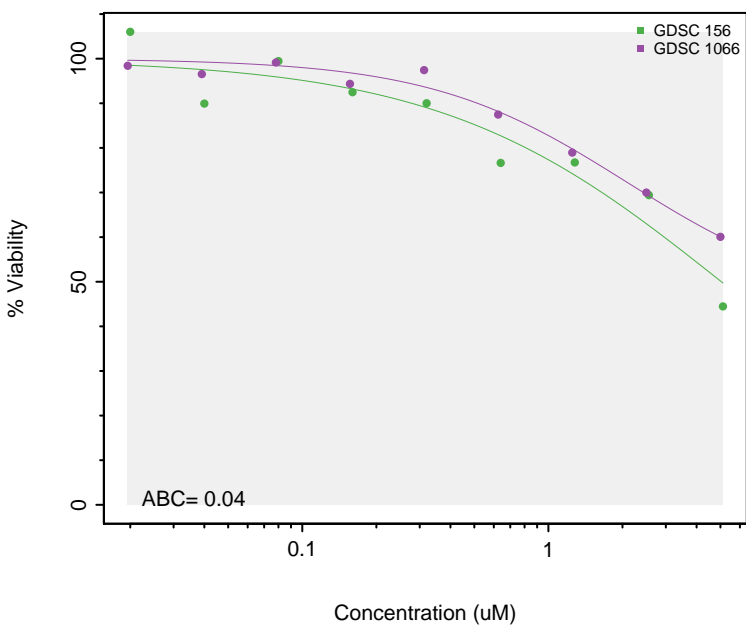

AZD6482:IA-LM

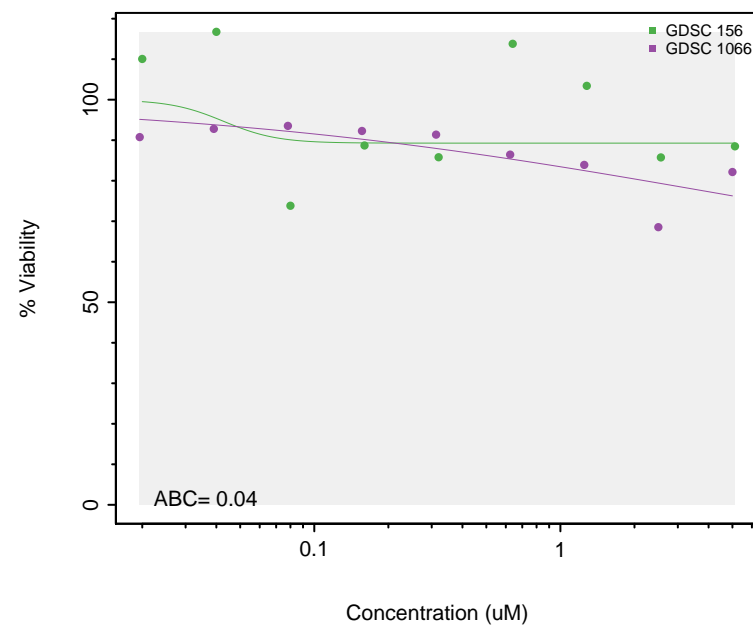

AZD6482:H9

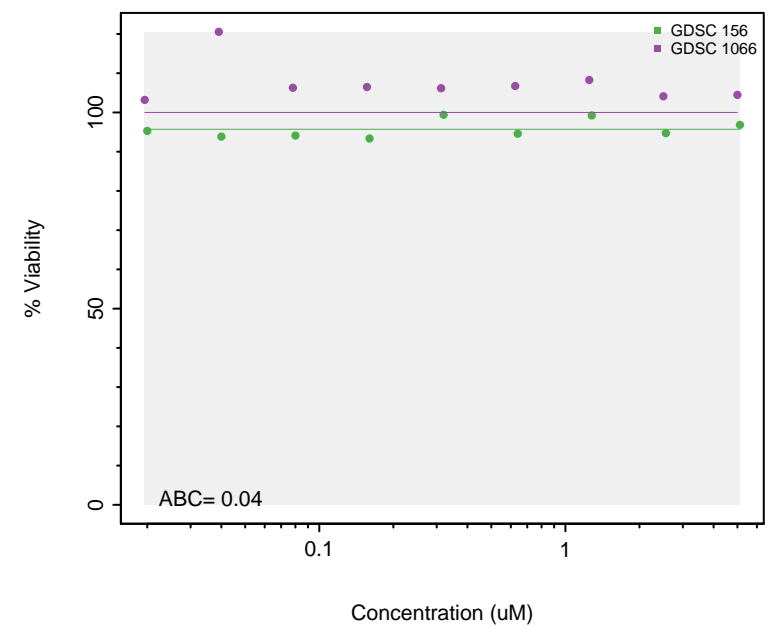



AZD6482:EPLC-272H

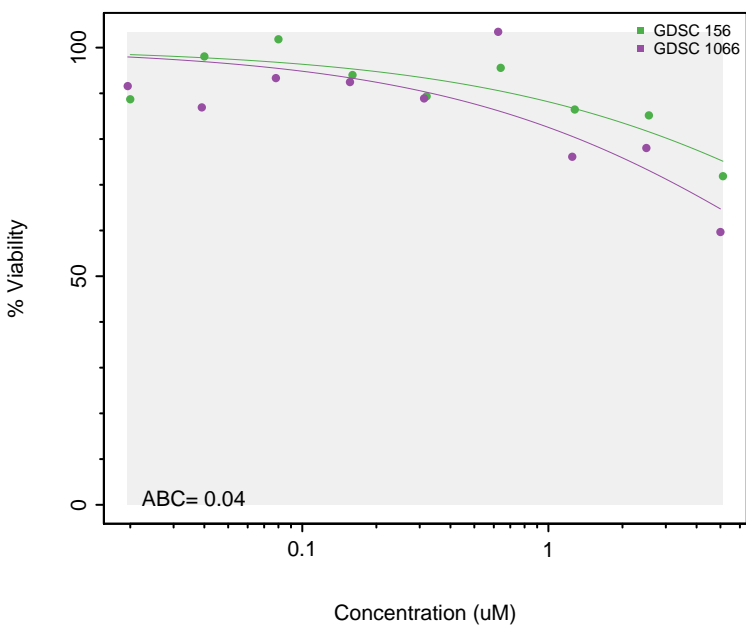

AZD6482:C2BBe1

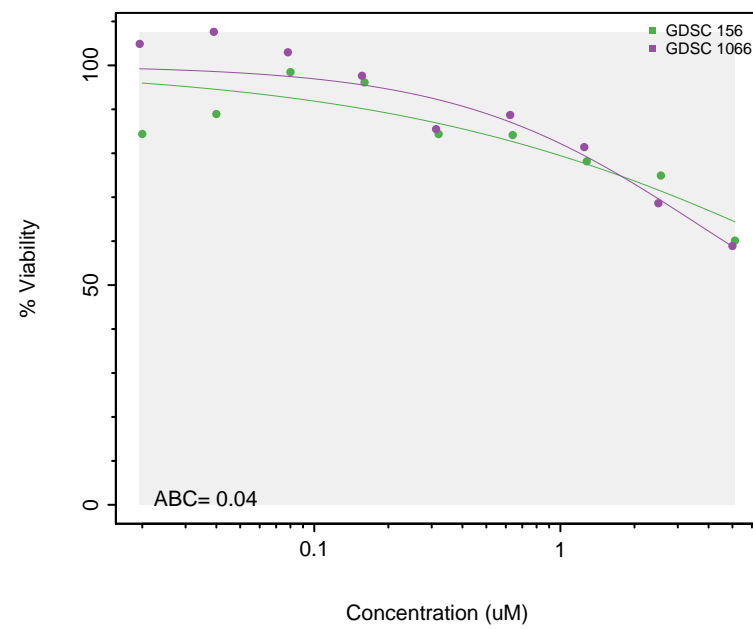

AZD6482:HSC-3

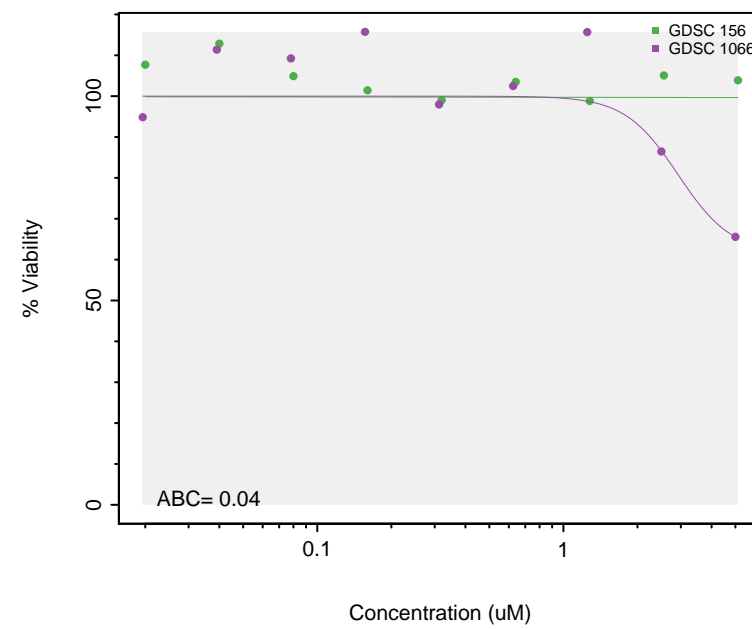

AZD6482:PFSK-1

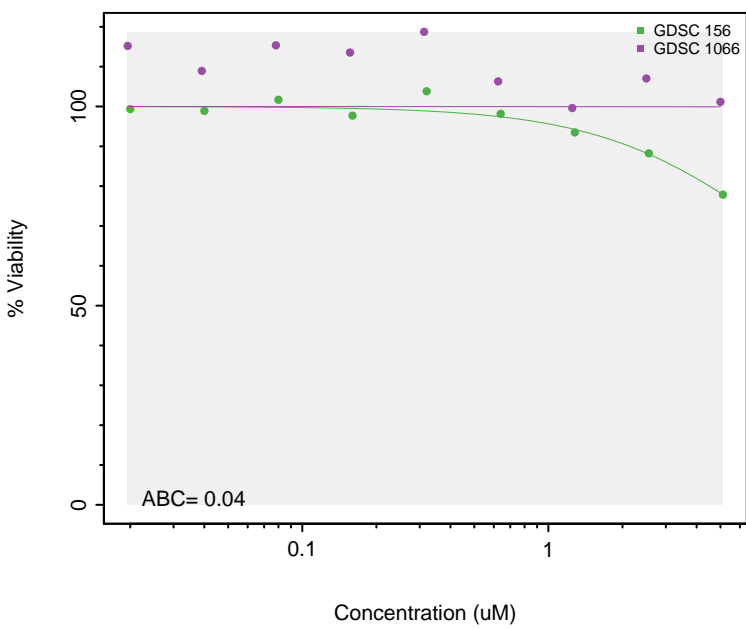

AZD6482:NCI-H1666

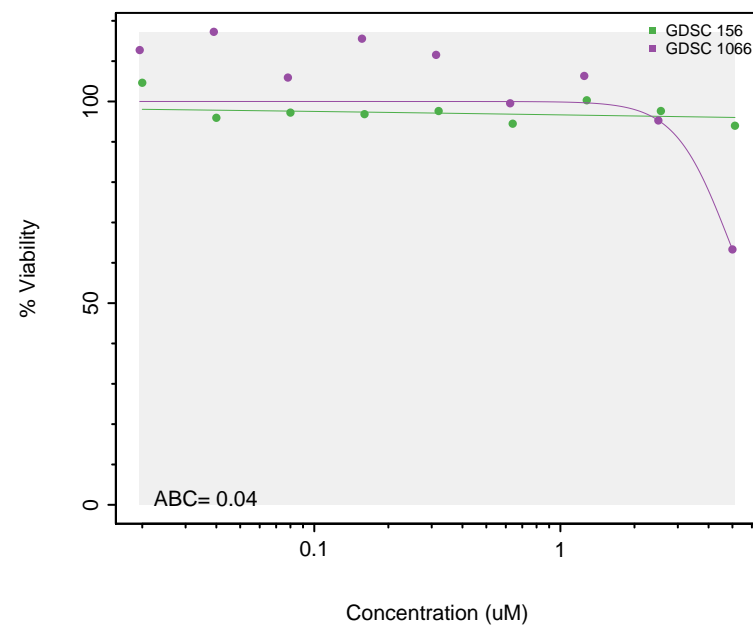

AZD6482:NCI-H1563

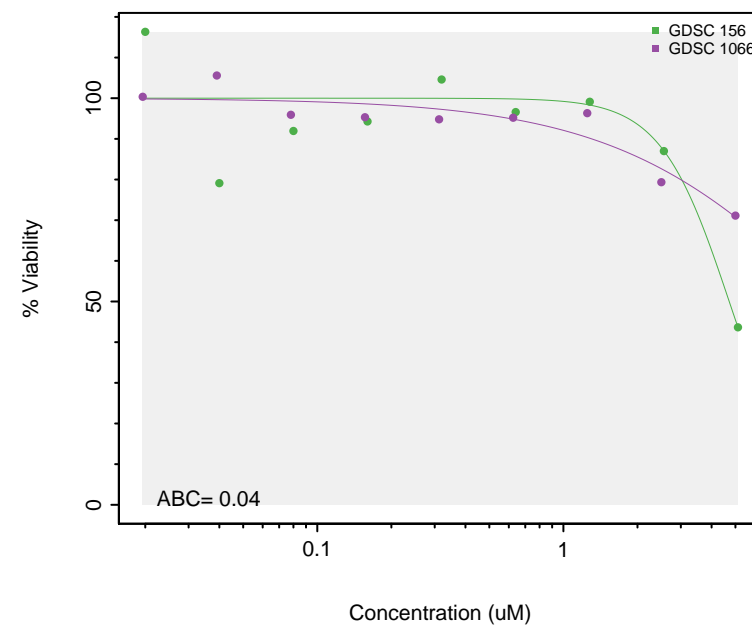

AZD6482:KYSE-70

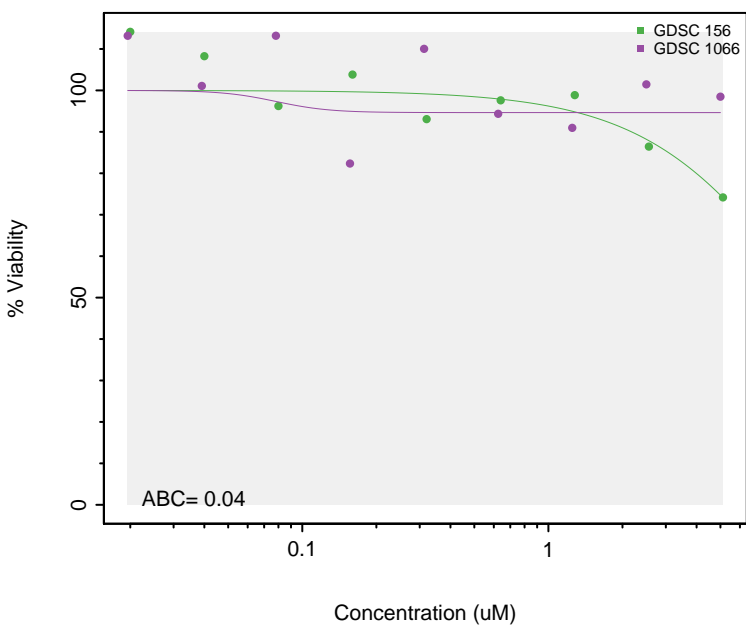

AZD6482:KYSE-140

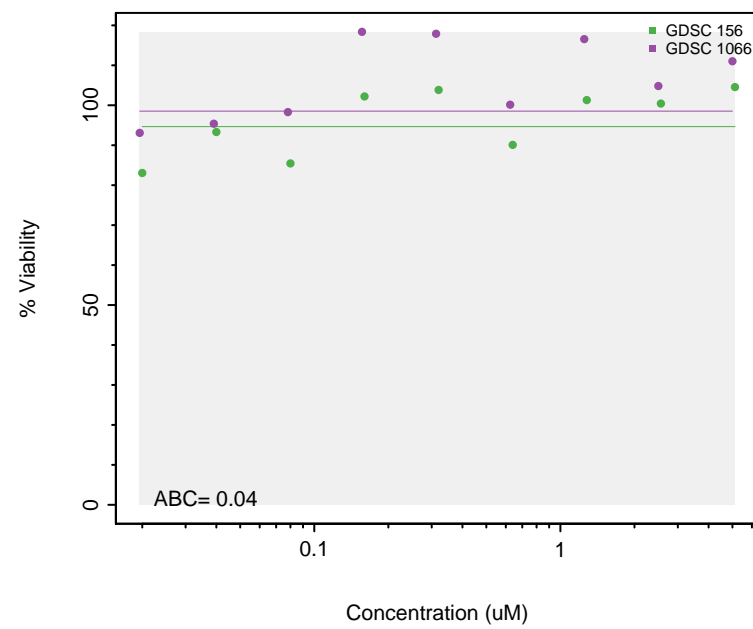

AZD6482:MIA-PaCa-2

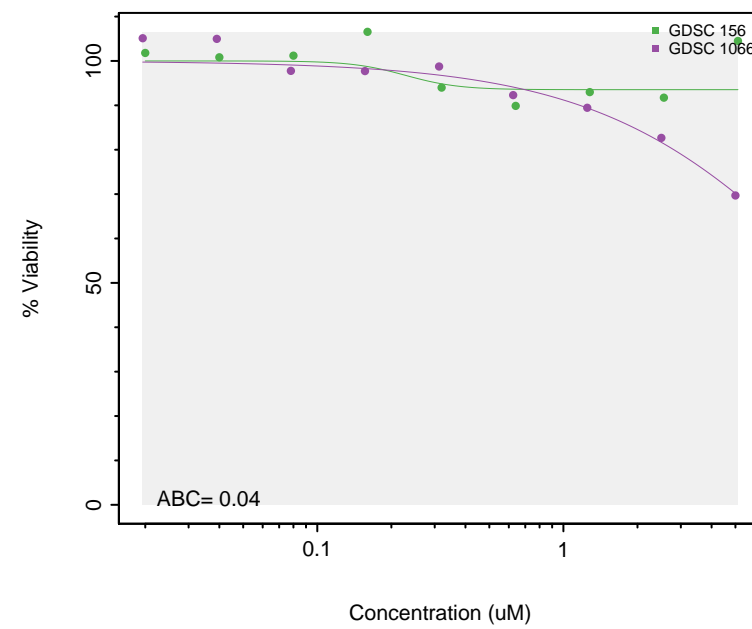

AZD6482:NCI-H2029

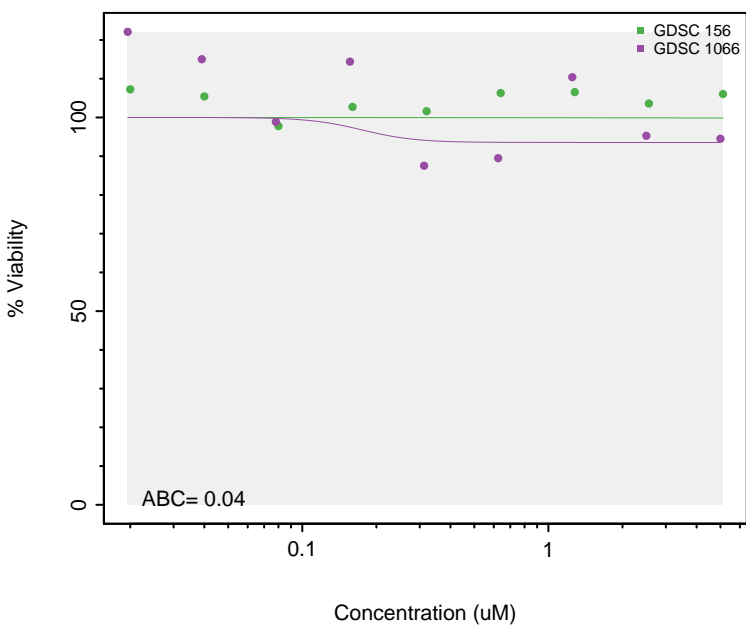

AZD6482:MMAC-SF

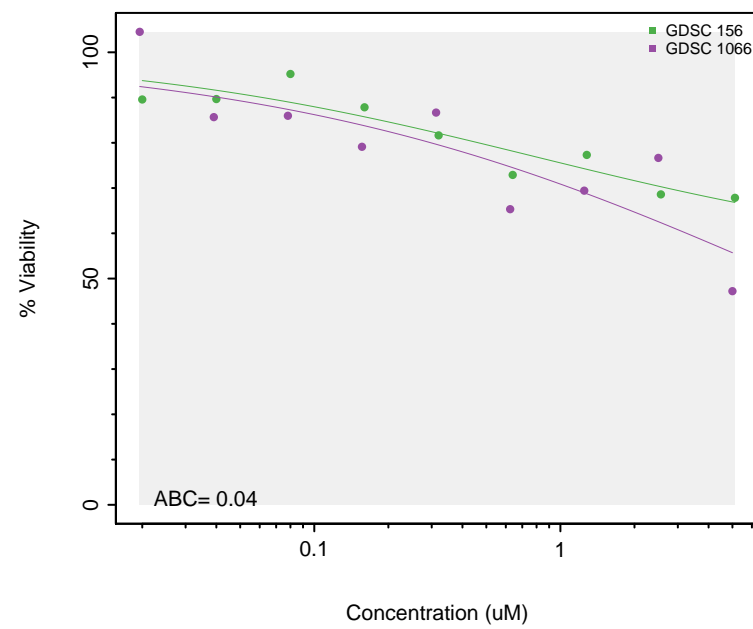

AZD6482:IST-SL1

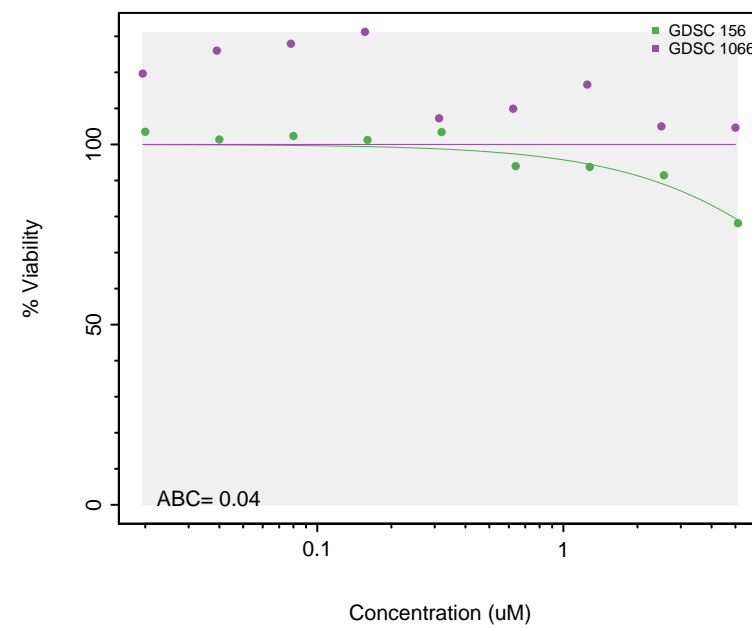



AZD6482:MS-1

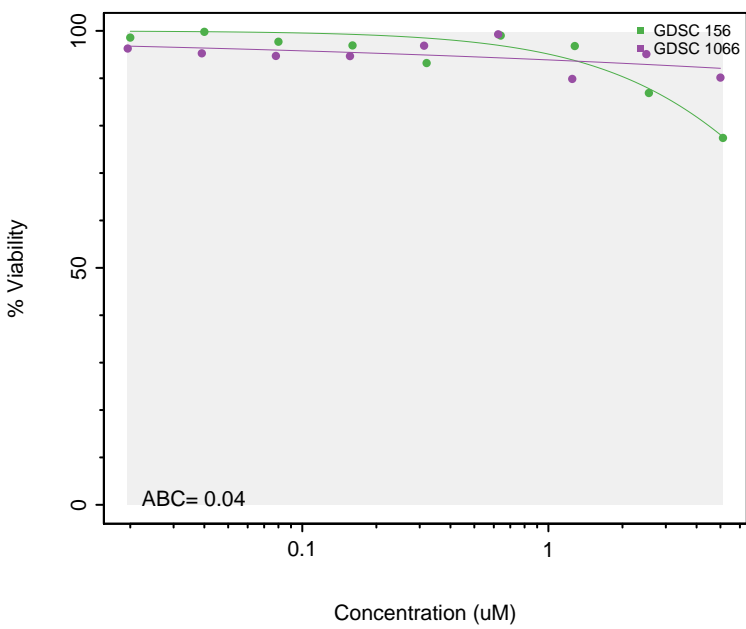

AZD6482:SK-N-AS

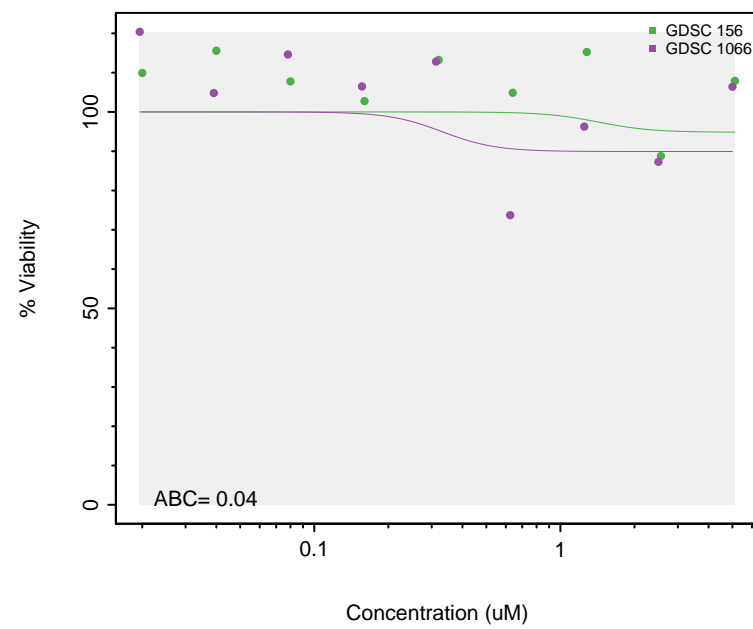

AZD6482:5637

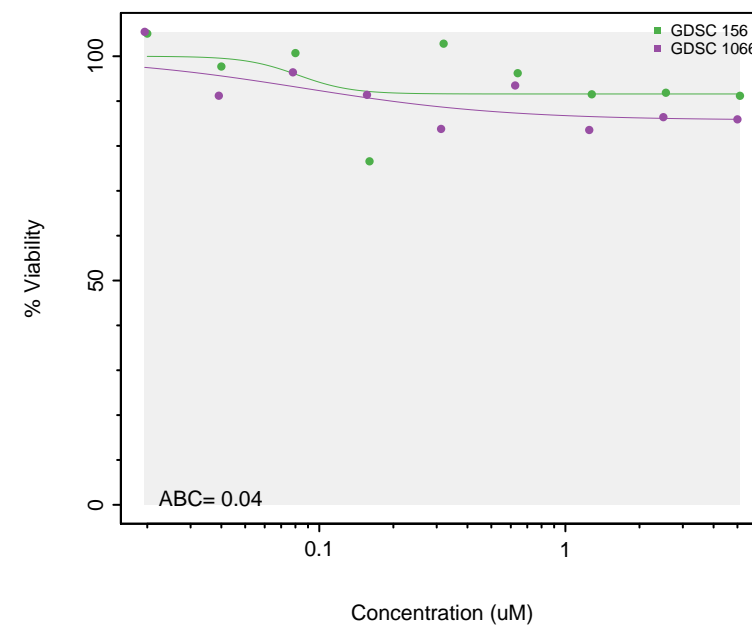

AZD6482:LCLC-97TM1

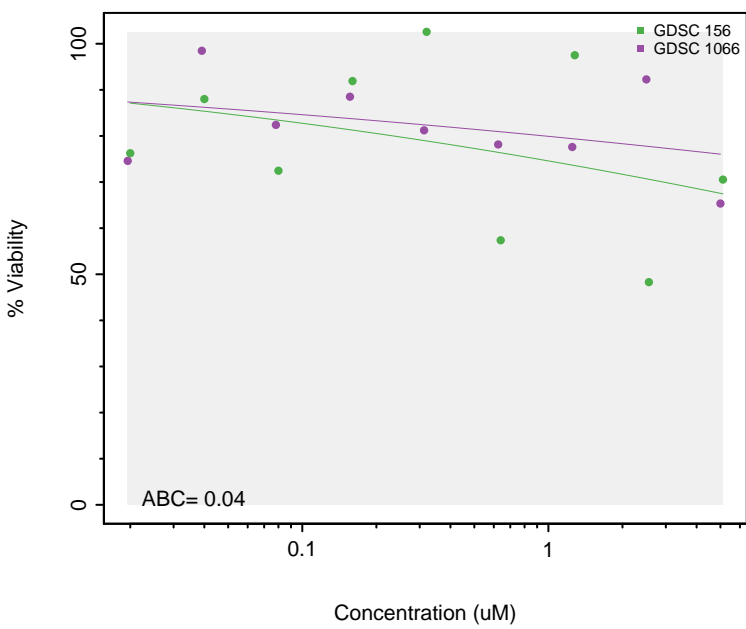

AZD6482:KARPAS-422

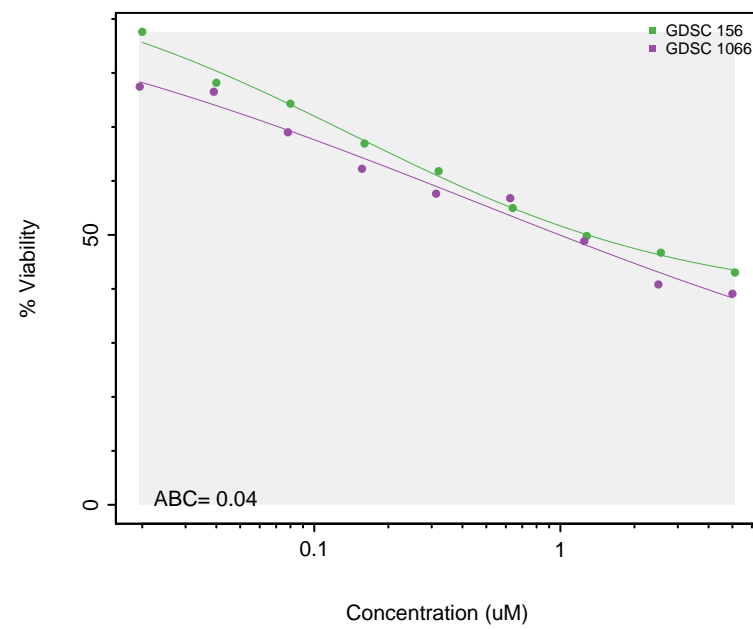

AZD6482:NCI-H1694

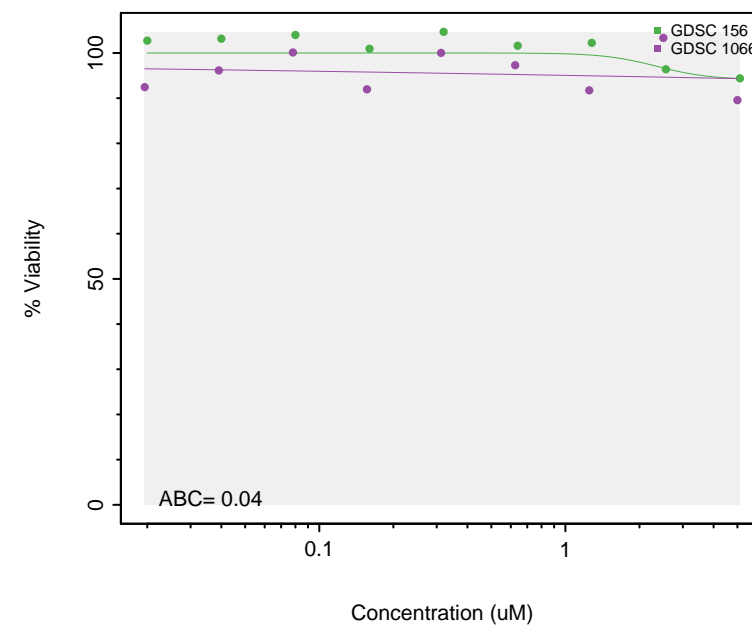

AZD6482:NCI-H596

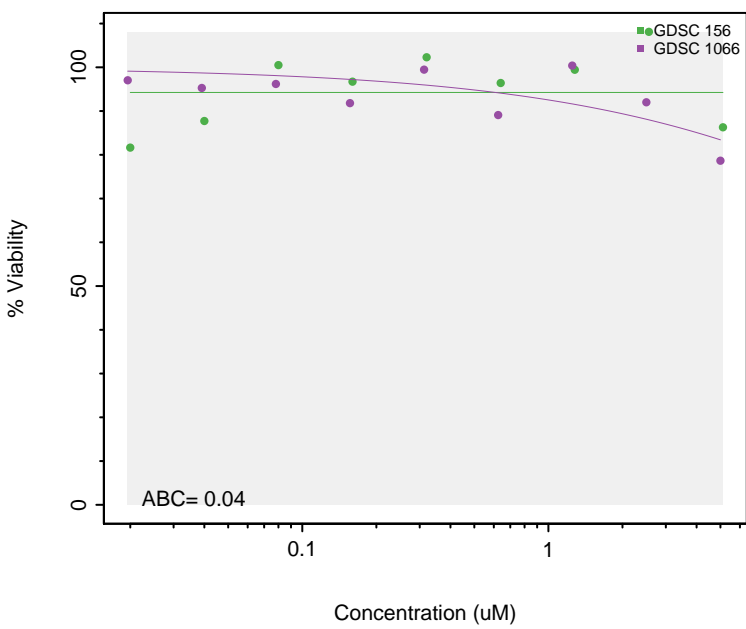

AZD6482:697

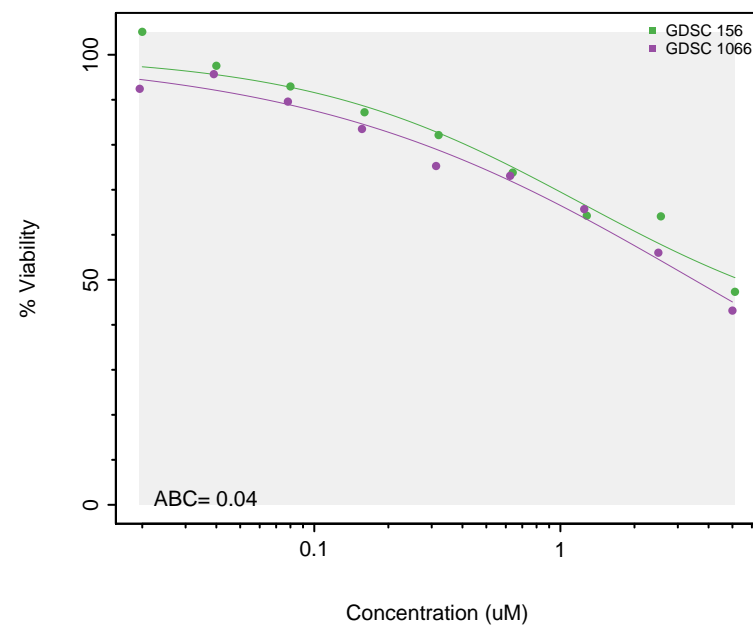

AZD6482:SK-MM-2

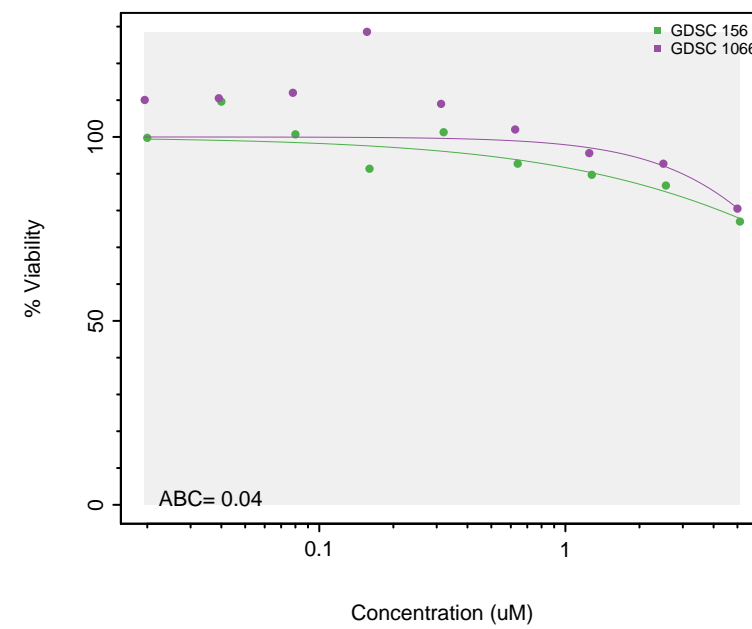

AZD6482:22RV1

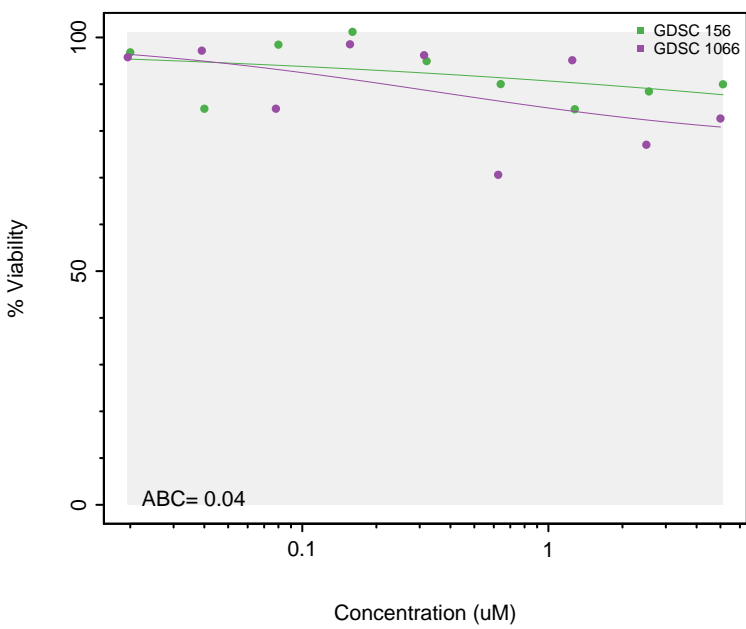

AZD6482:UACC-257

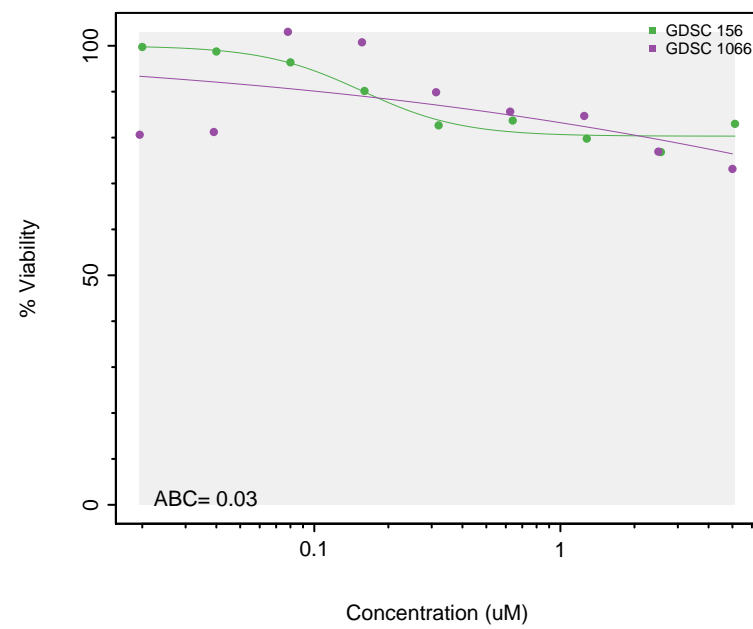

AZD6482:NBsusSR

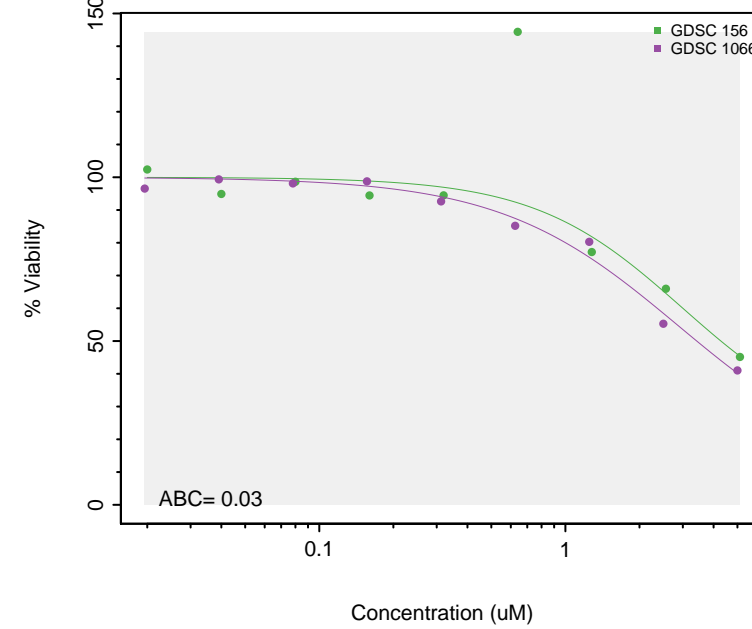

AZD6482:SW948

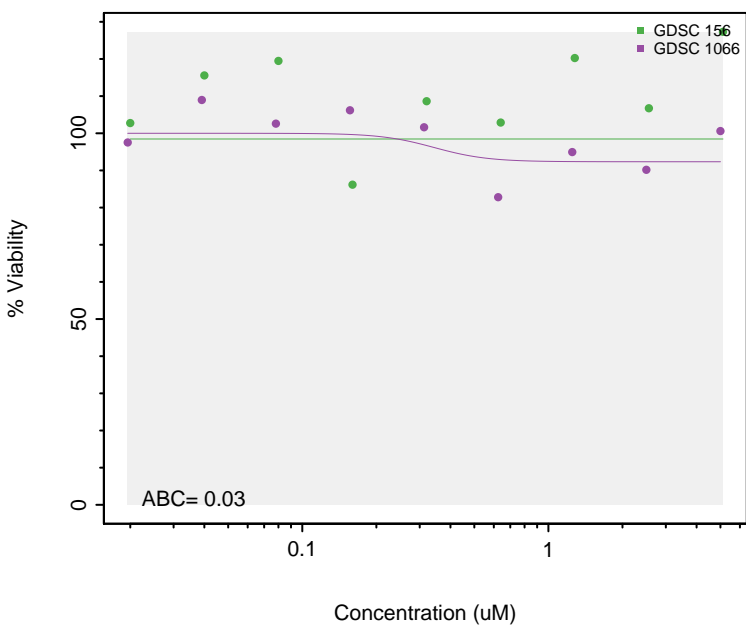

AZD6482:DMS-114

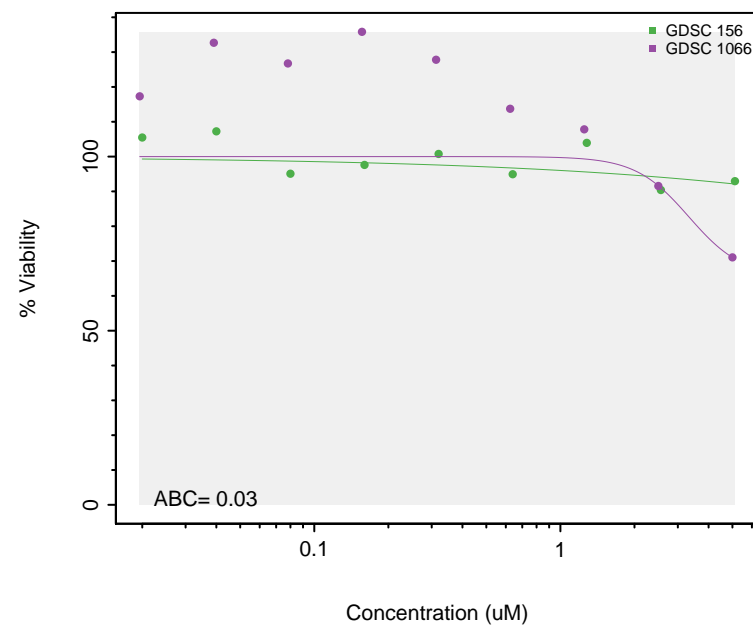

AZD6482:NCI-H226

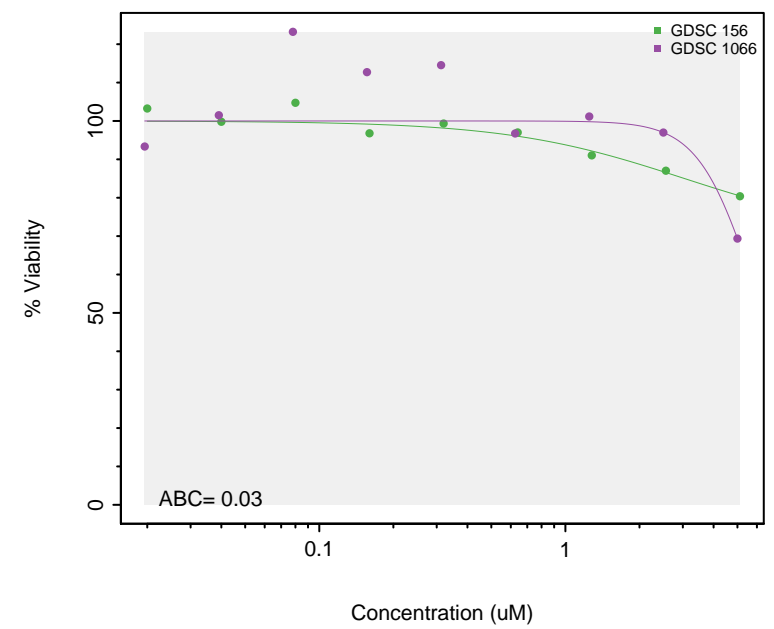

AZD6482:NCI-H1693

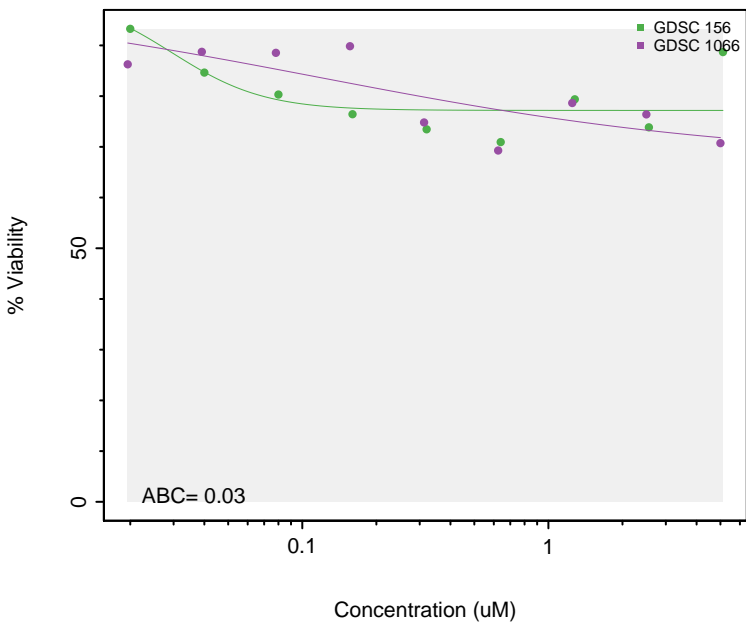

AZD6482:MDA-MB-361

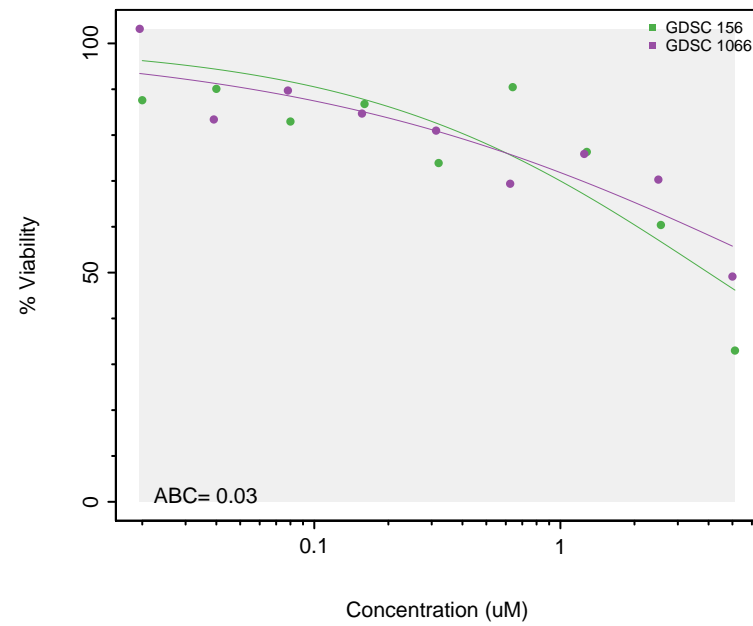

AZD6482:CW-2

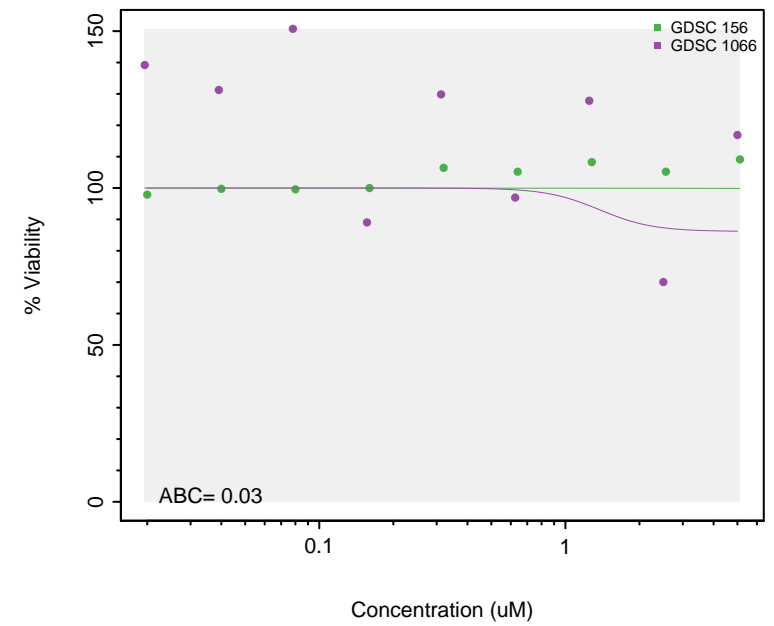

AZD6482:REH

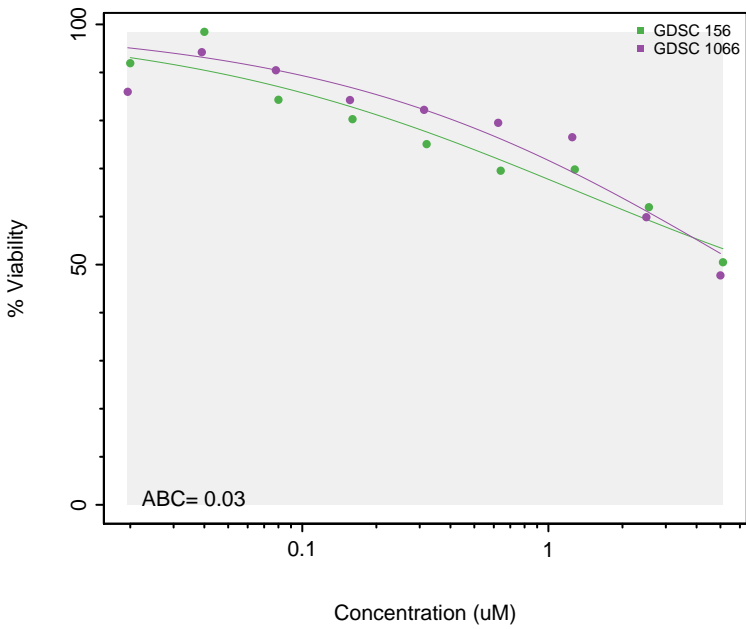

AZD6482:TE-5

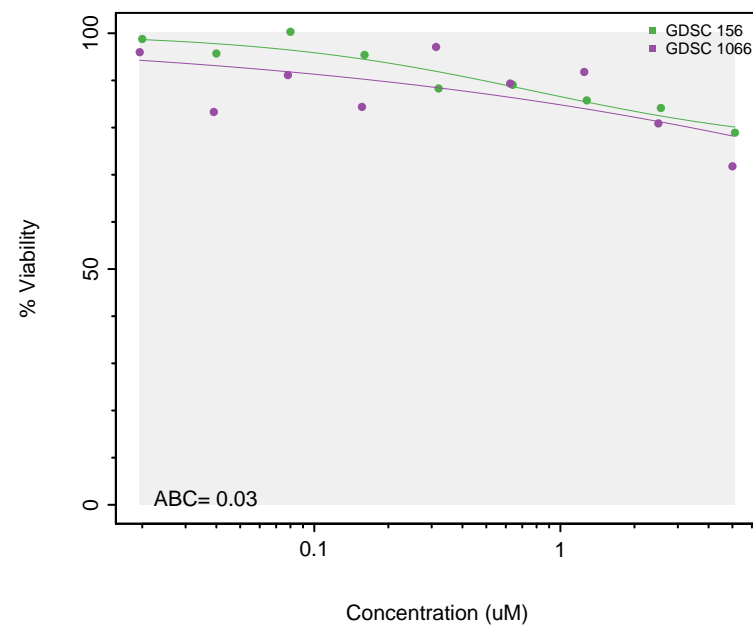

AZD6482:CHP-212

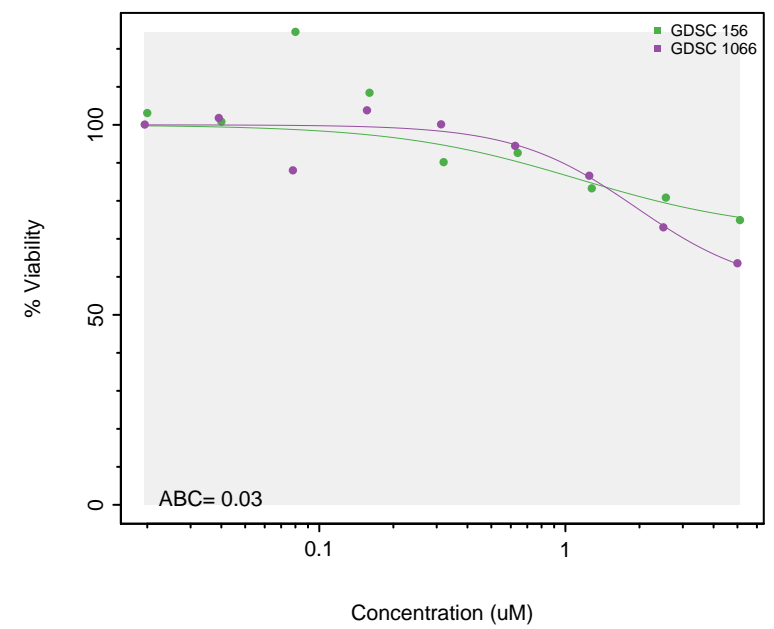

AZD6482:AU565

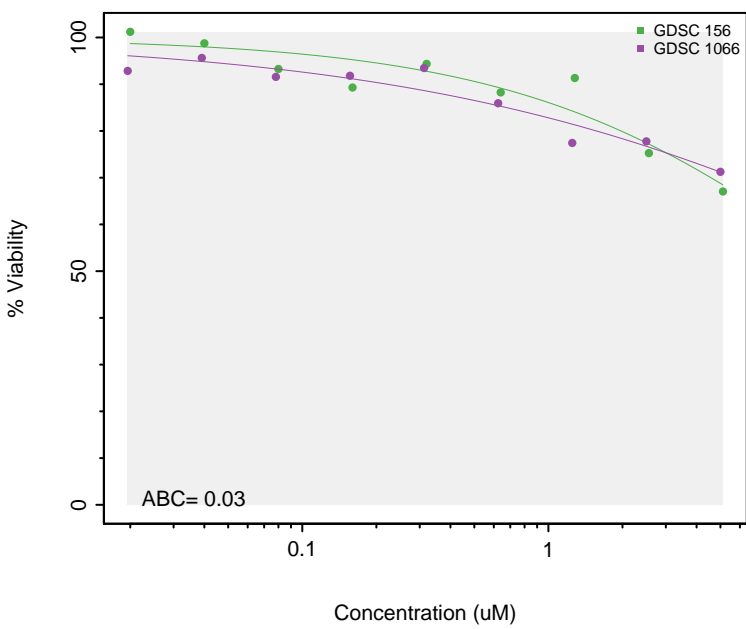

AZD6482:Raji

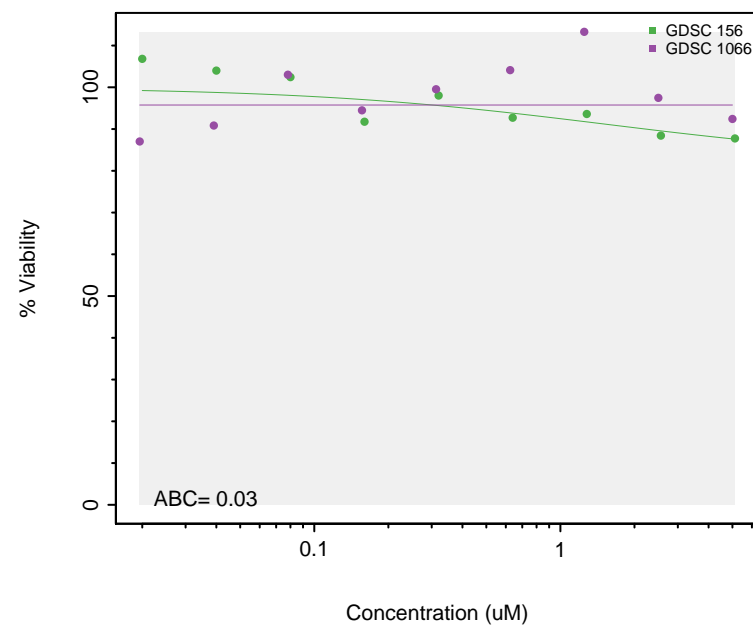

AZD6482:RL

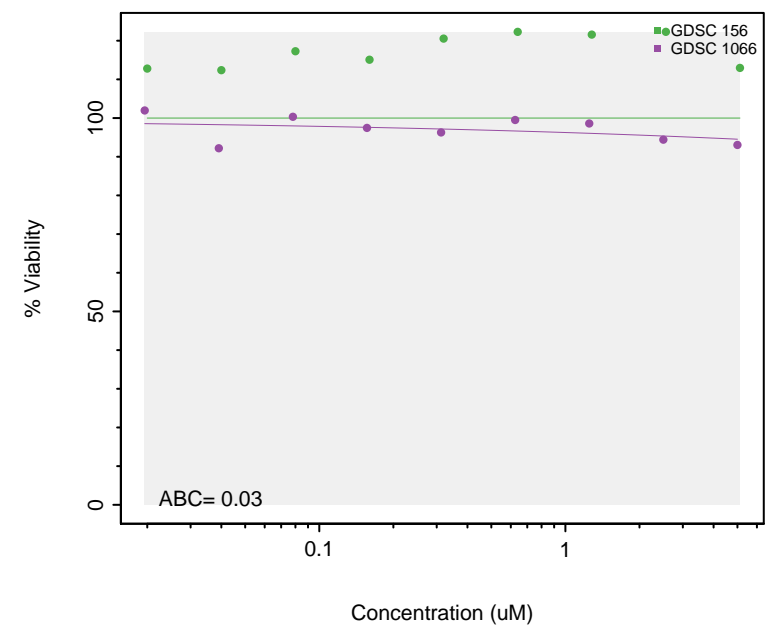

AZD6482:NCI-H2122

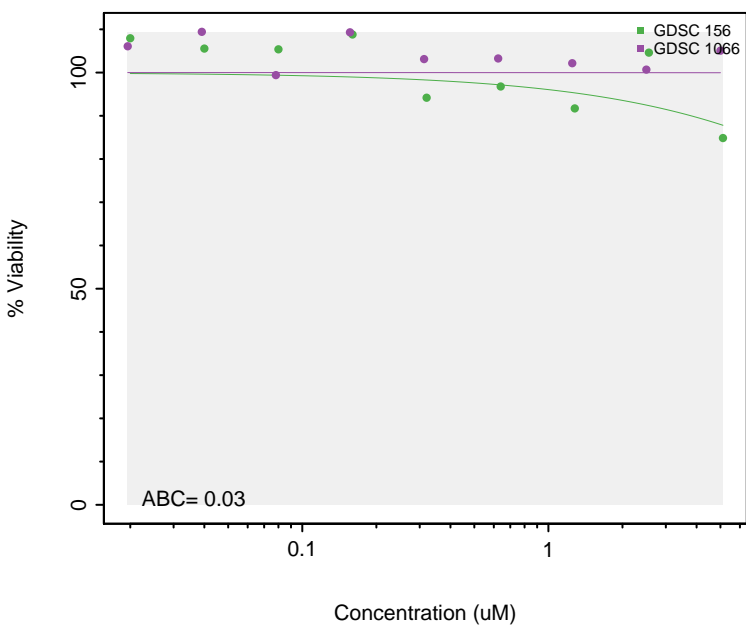

AZD6482:NCI-H2141

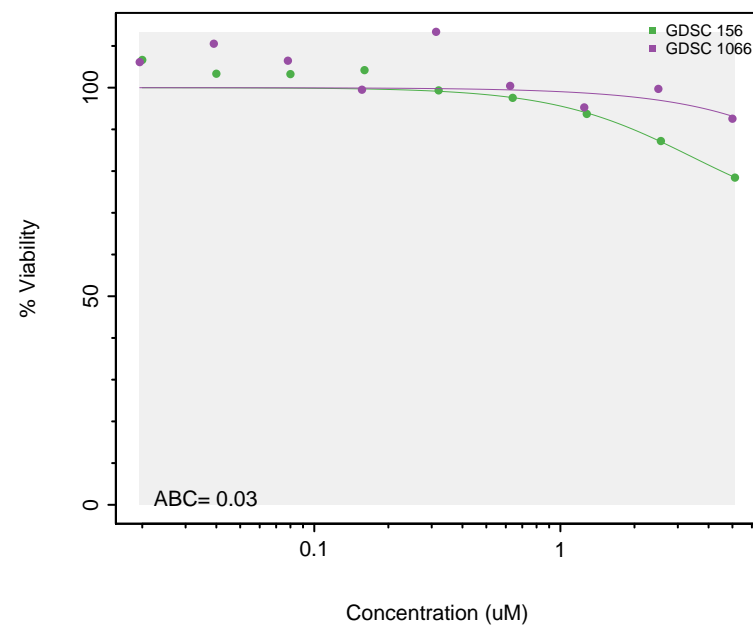

AZD6482:MEL-JUSO

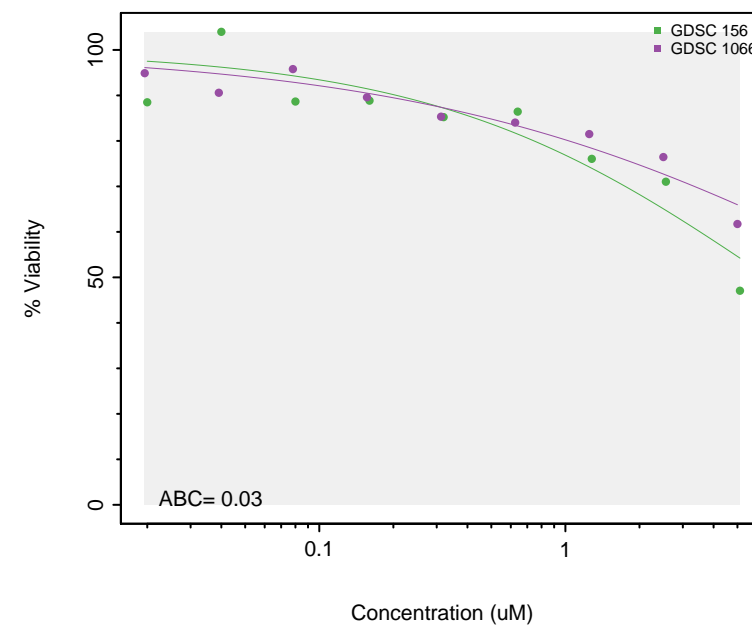

AZD6482:MKN28

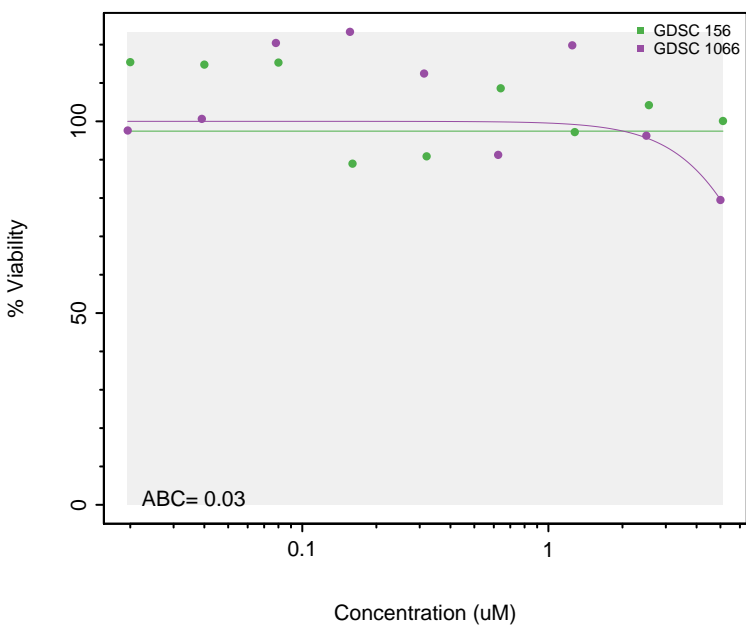

AZD6482:NB10

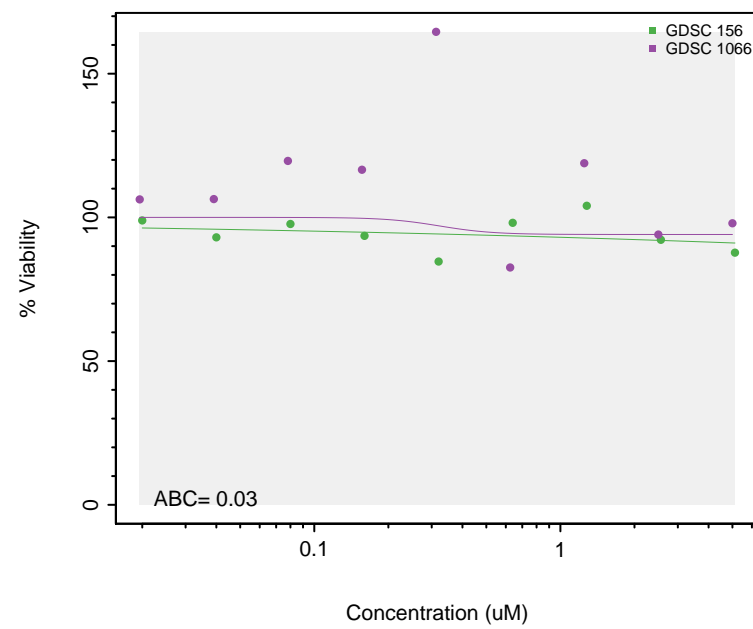

AZD6482:HEL

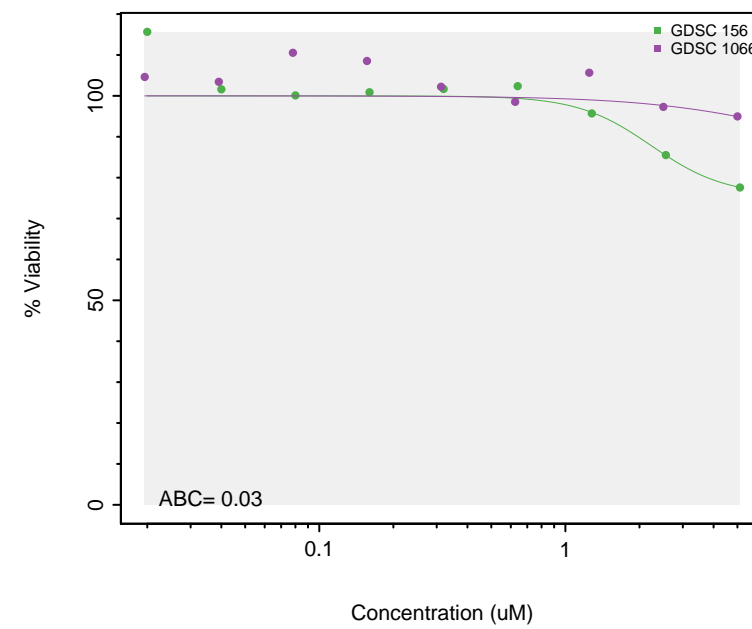

AZD6482:NCI-H1092

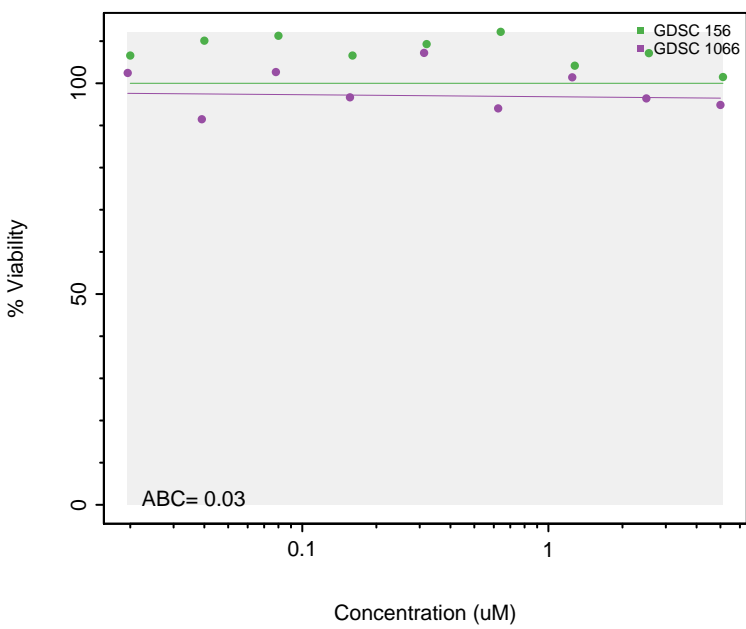

AZD6482:NCI-H23

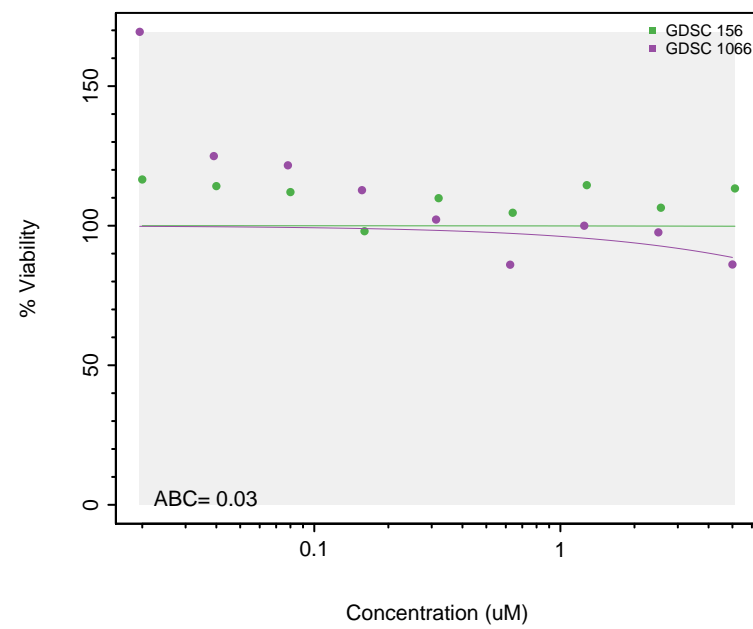

AZD6482:DMS-79

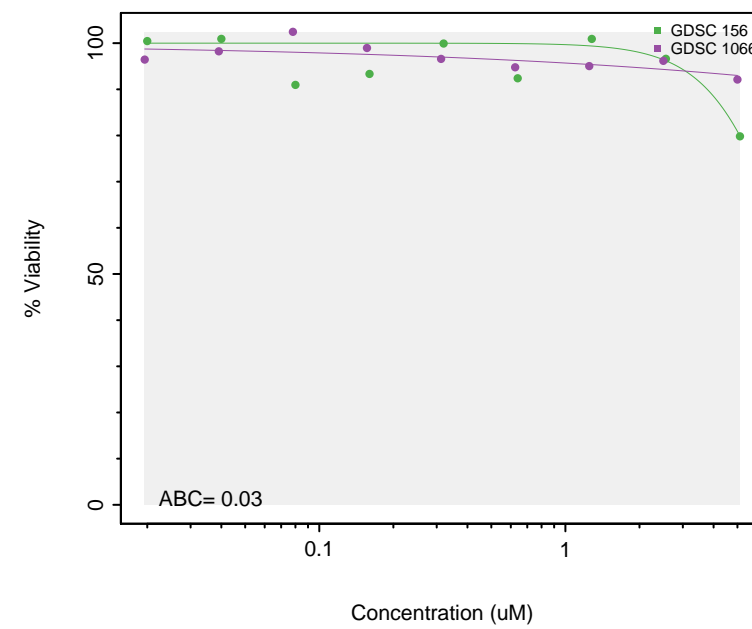

AZD6482:Caov-4

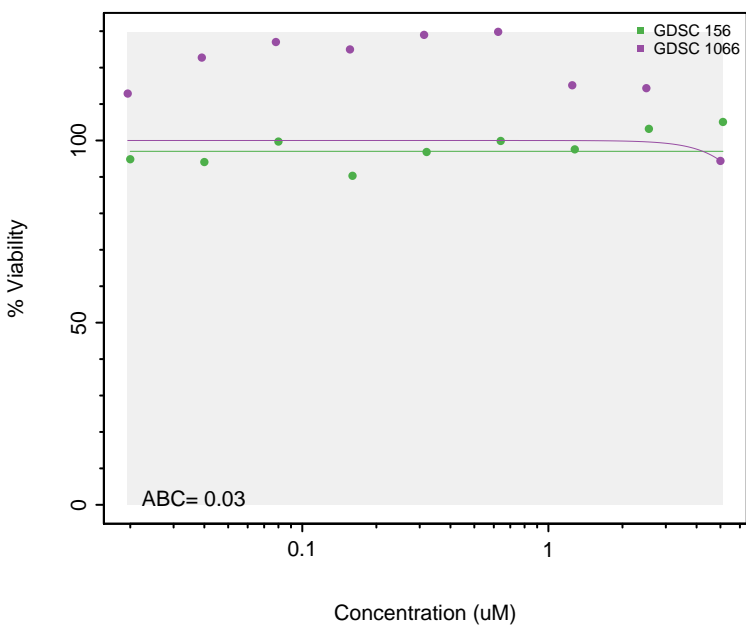

AZD6482:NCI-H1355

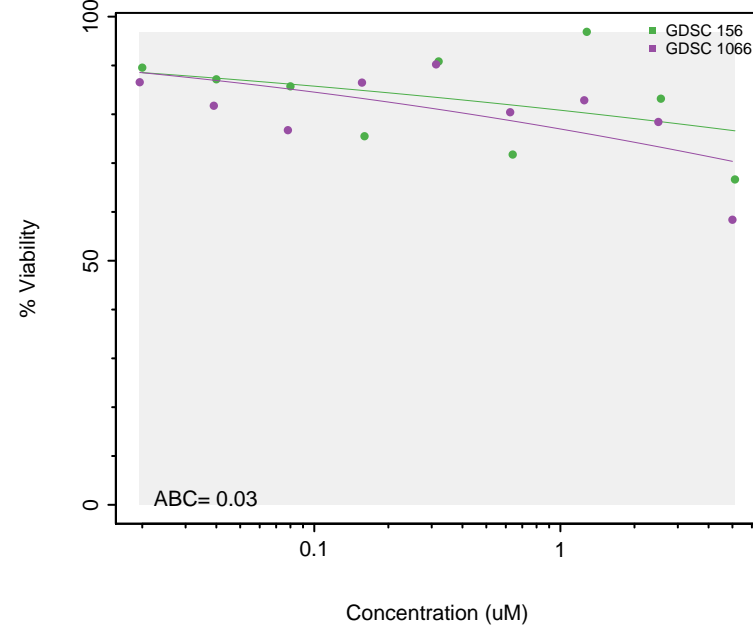

AZD6482:H-EMC-SS

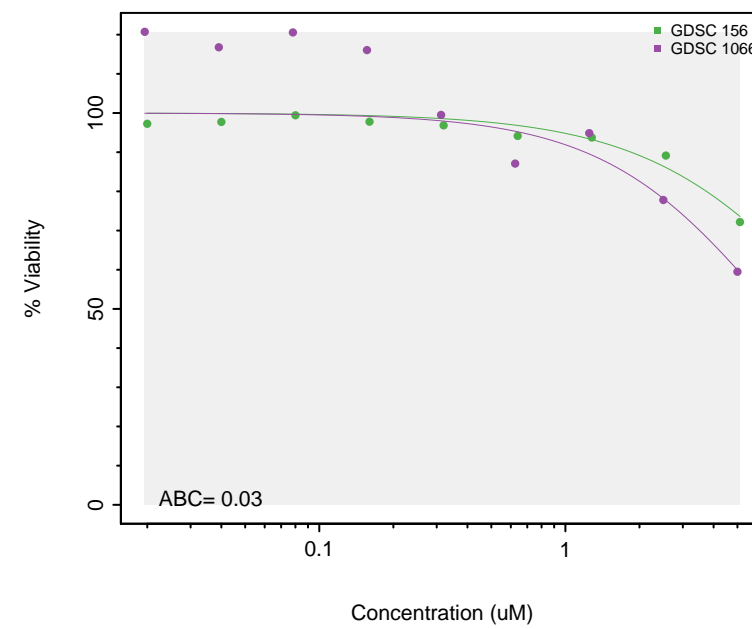

AZD6482:PSN1

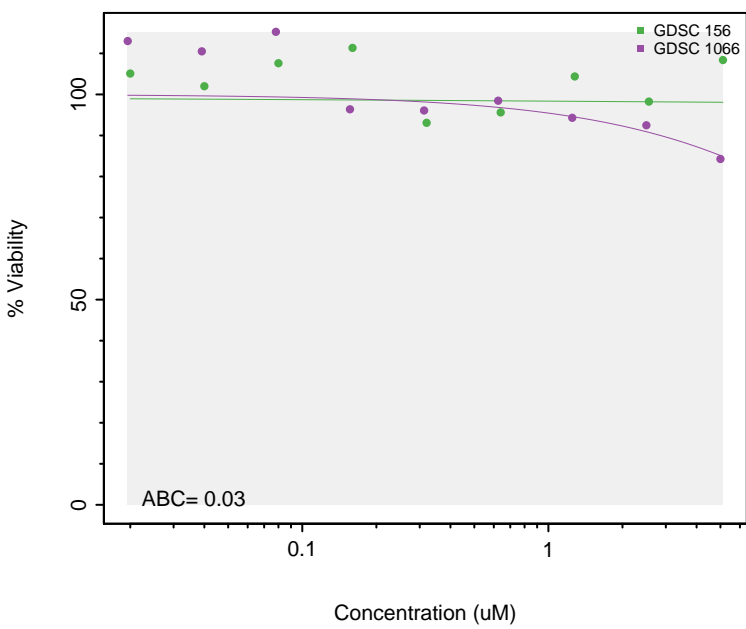

AZD6482:NB13

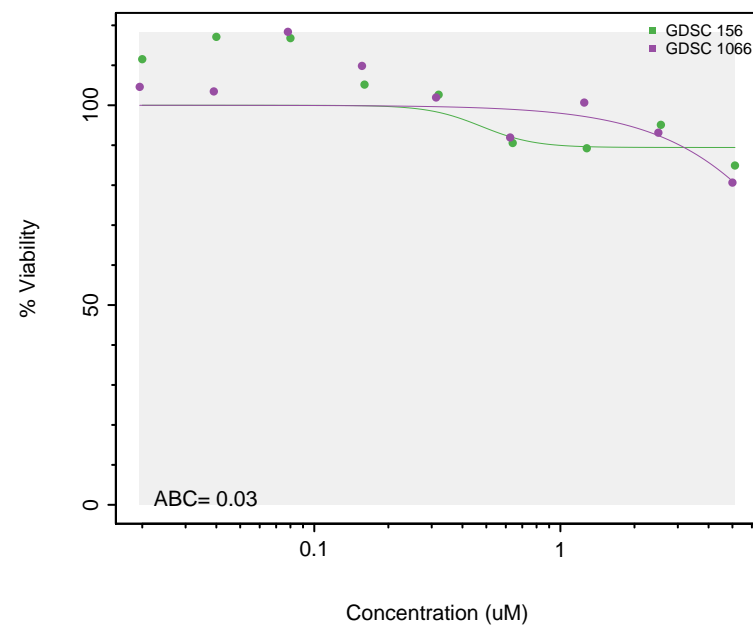

AZD6482:BT-474

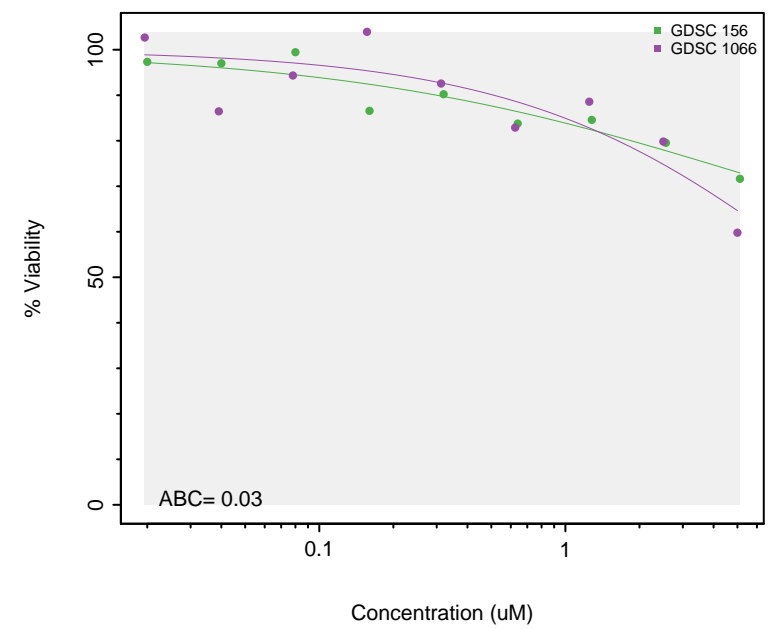

AZD6482:KINGS-1

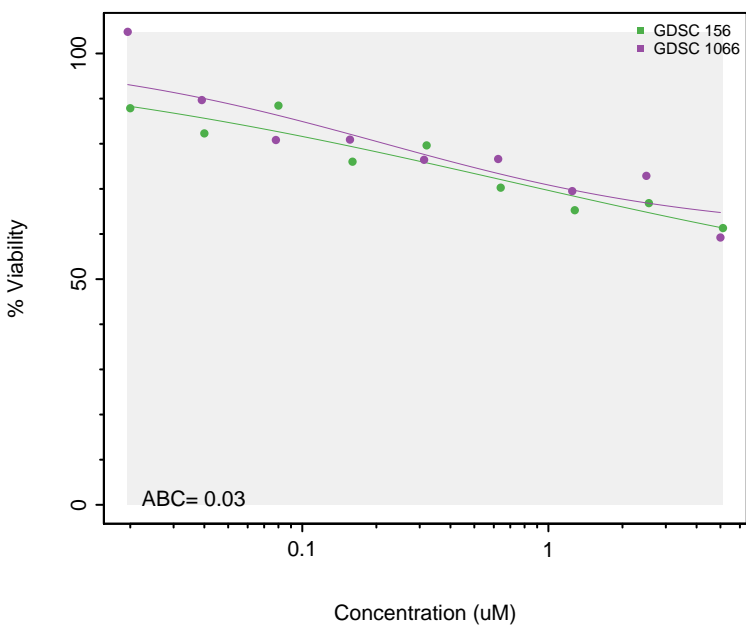

AZD6482:MV-4-11

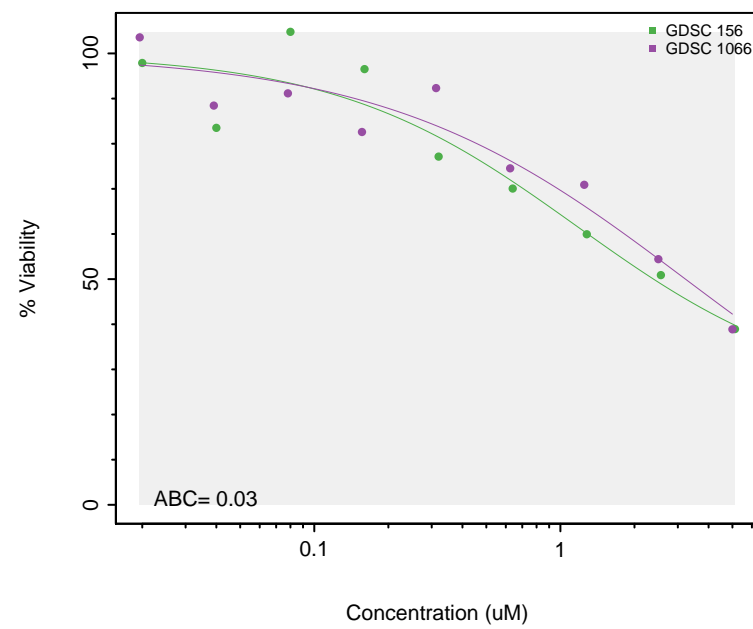

AZD6482:RH-1

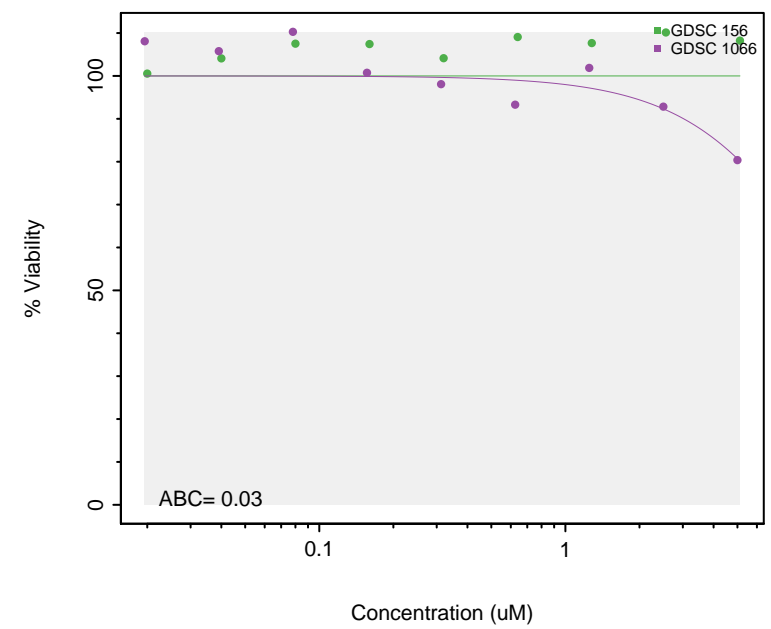

AZD6482:DJM-1

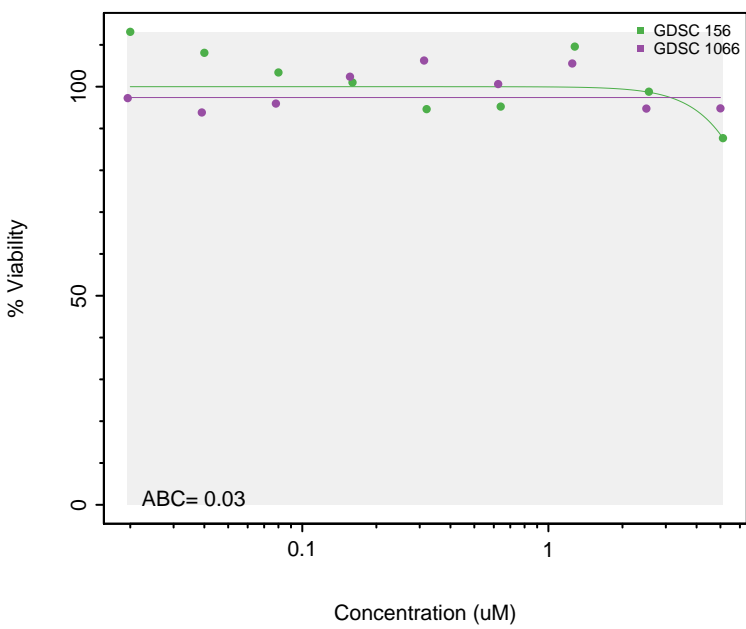

AZD6482:HCC1395

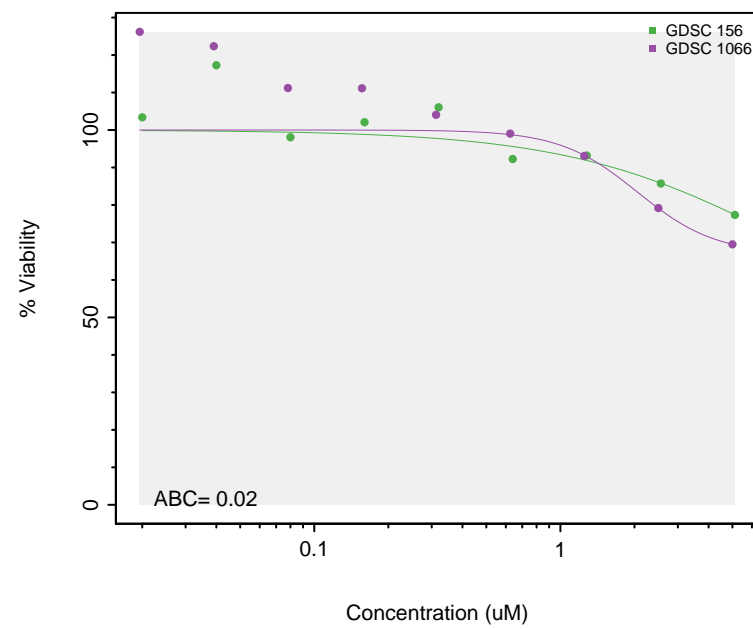

AZD6482:Capan-2

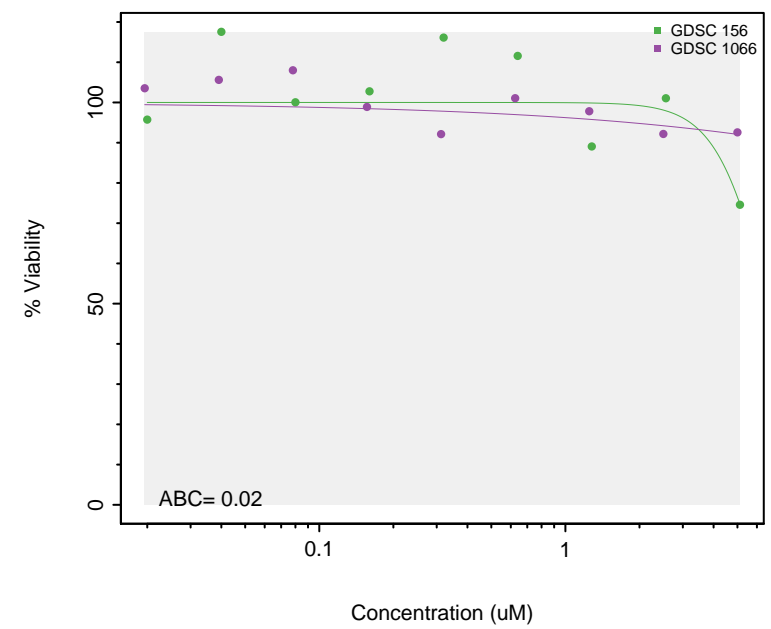

AZD6482:TE-1

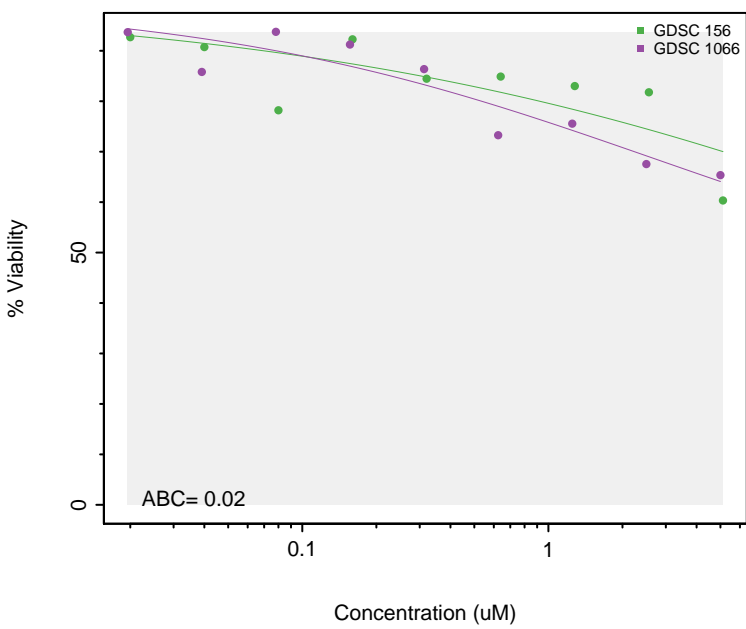

AZD6482:EW-24

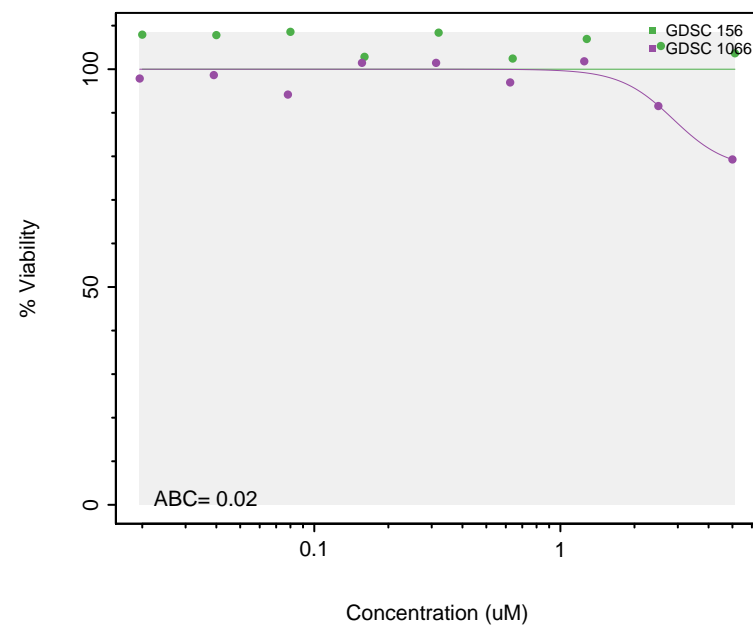

AZD6482:MLMA

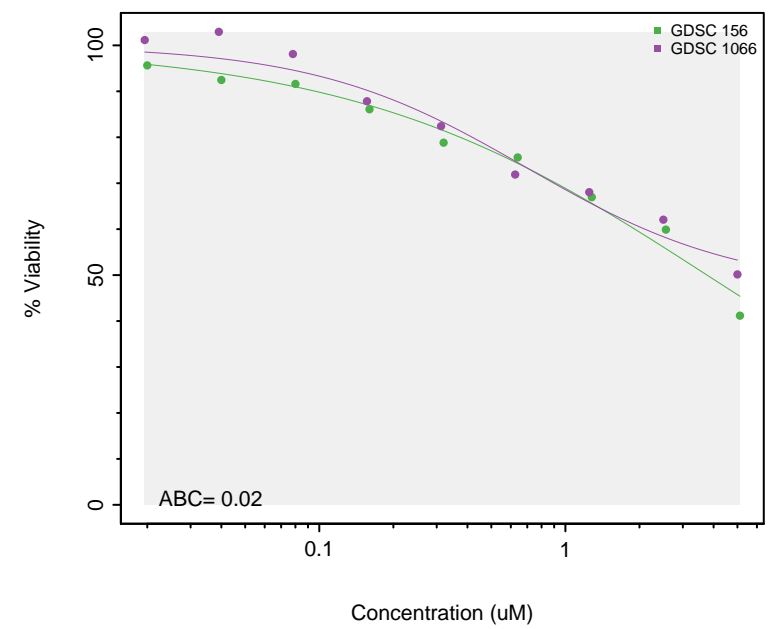

AZD6482:SHp-77

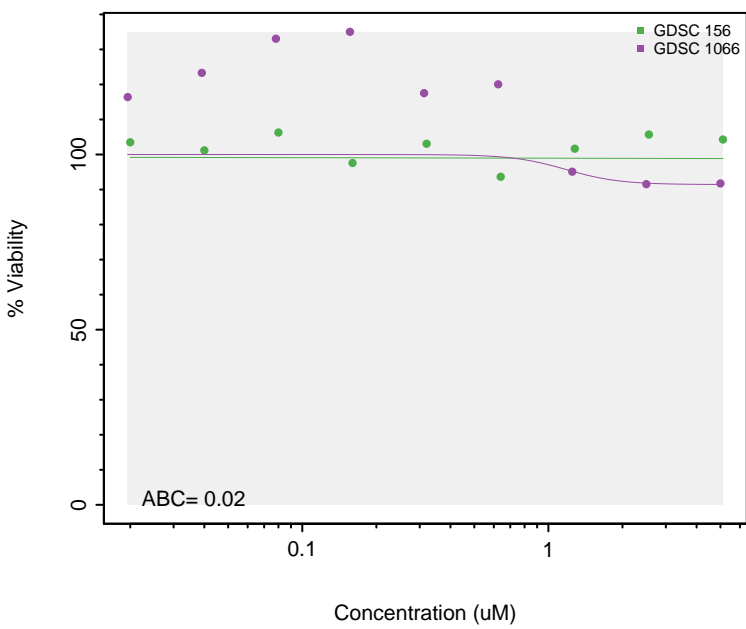

AZD6482:BL-41

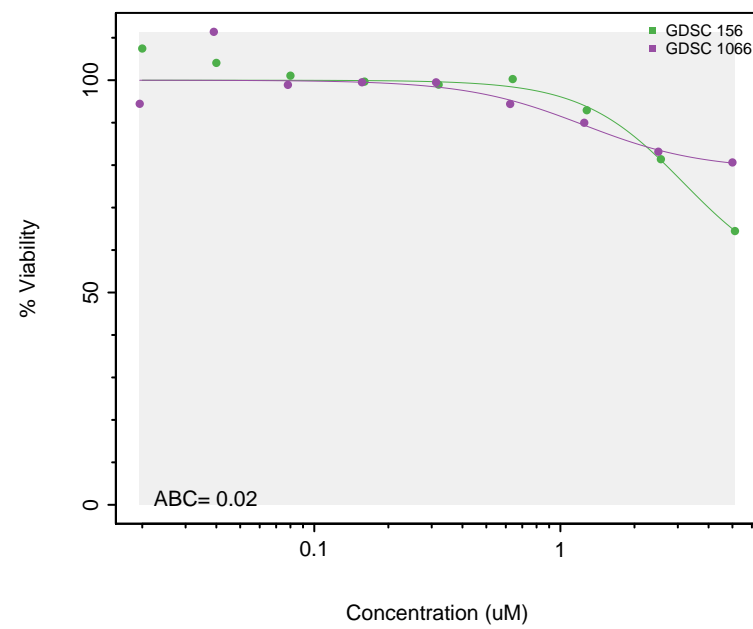

AZD6482:CTV-1

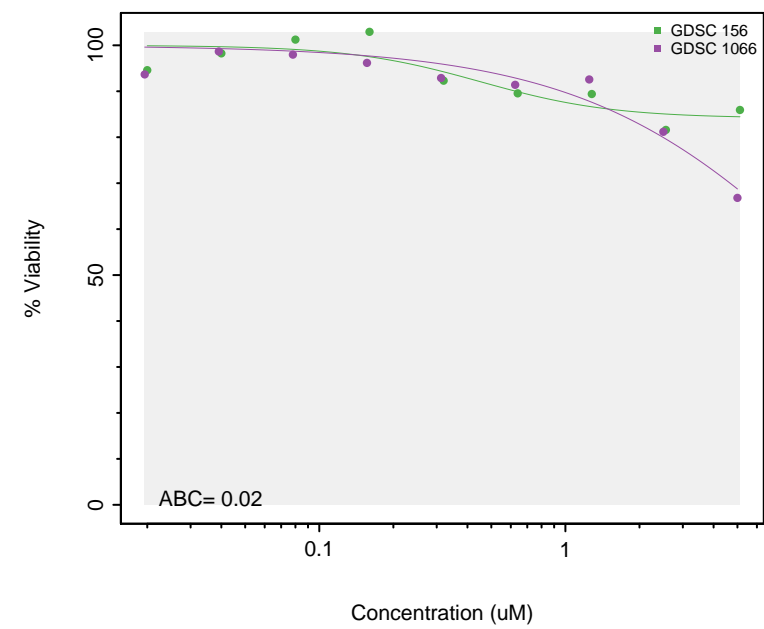

AZD6482:MHH-NB-11

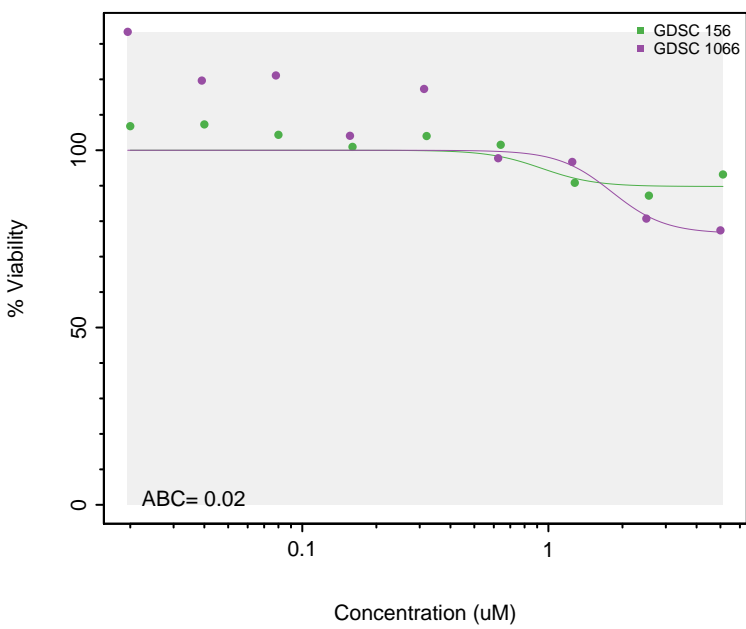

AZD6482:TGBC11TKB

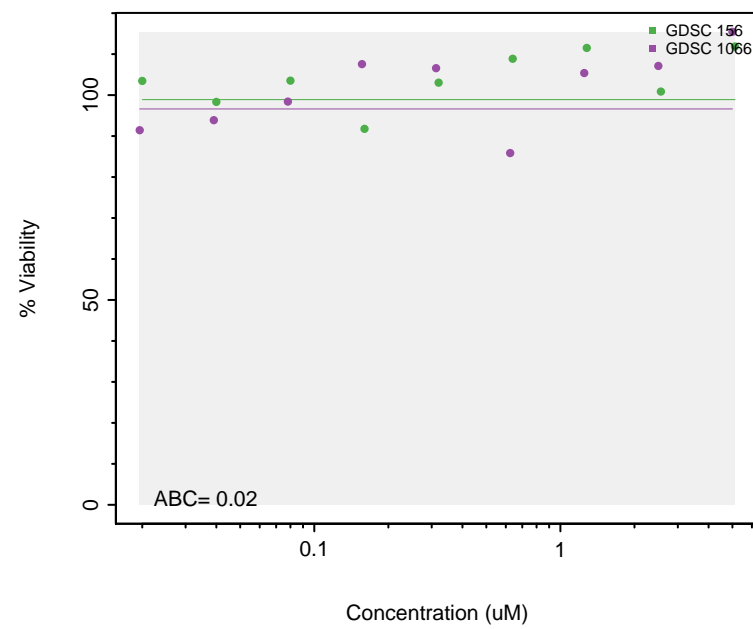

AZD6482:COLO-668

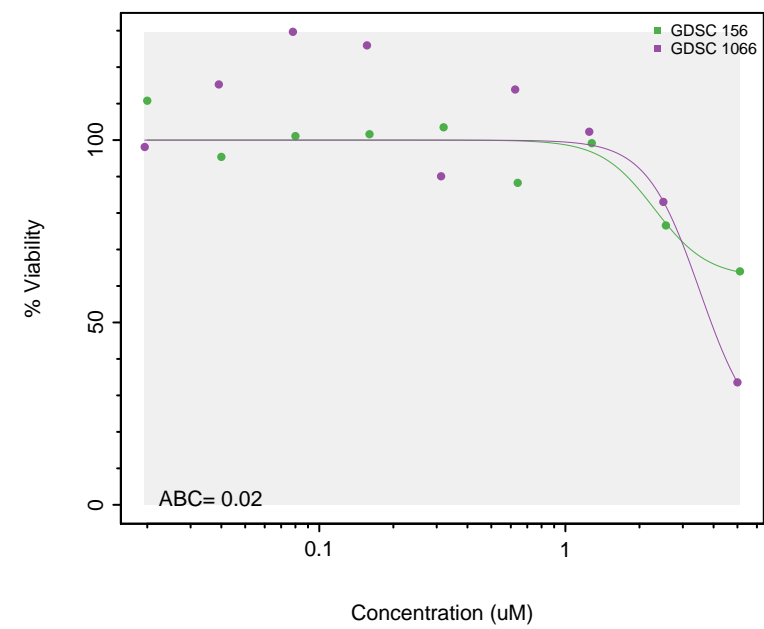

AZD6482:RPMI-7951

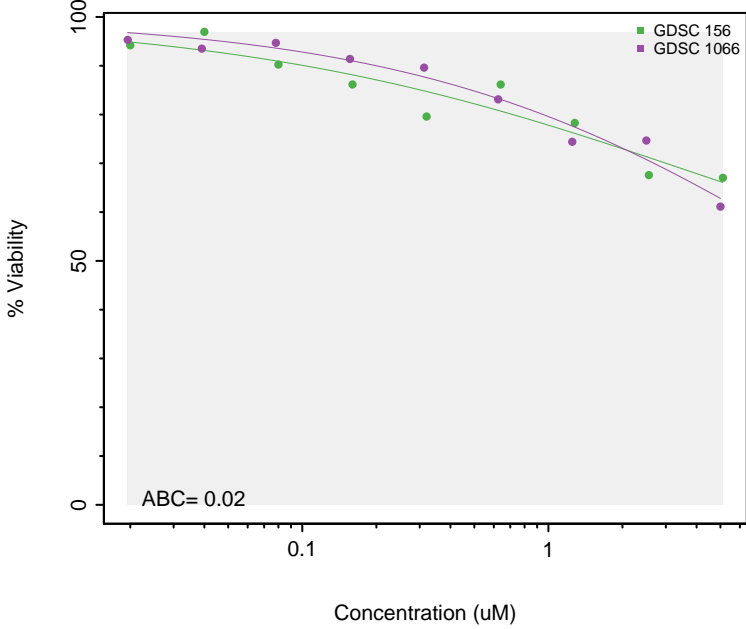

AZD6482:BCPAP

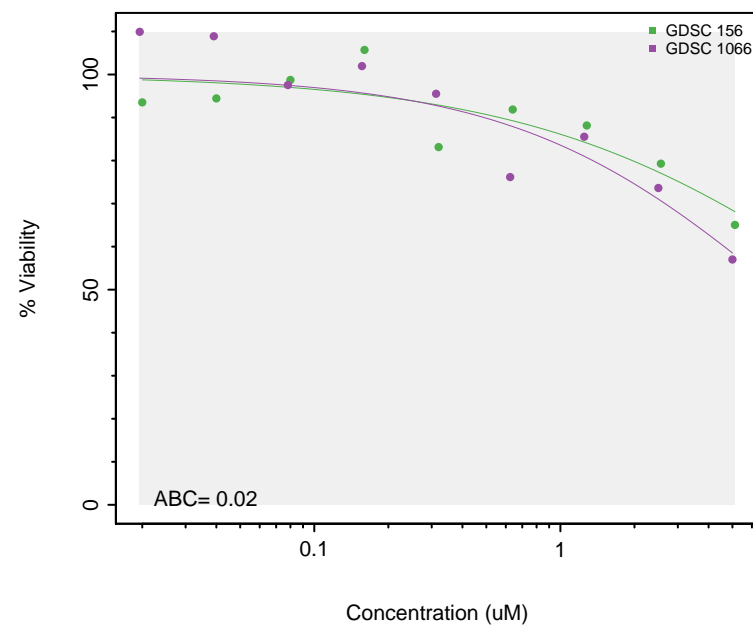

AZD6482:Daoy

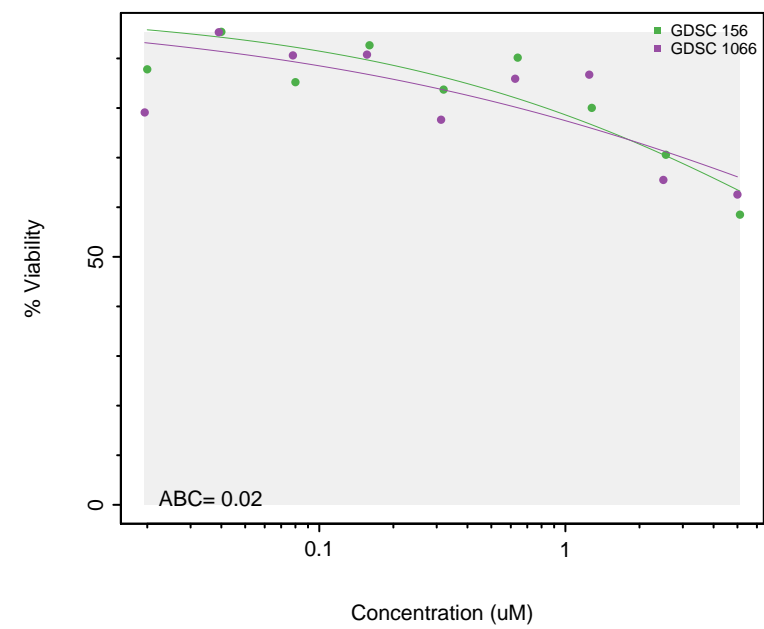

AZD6482:FADU

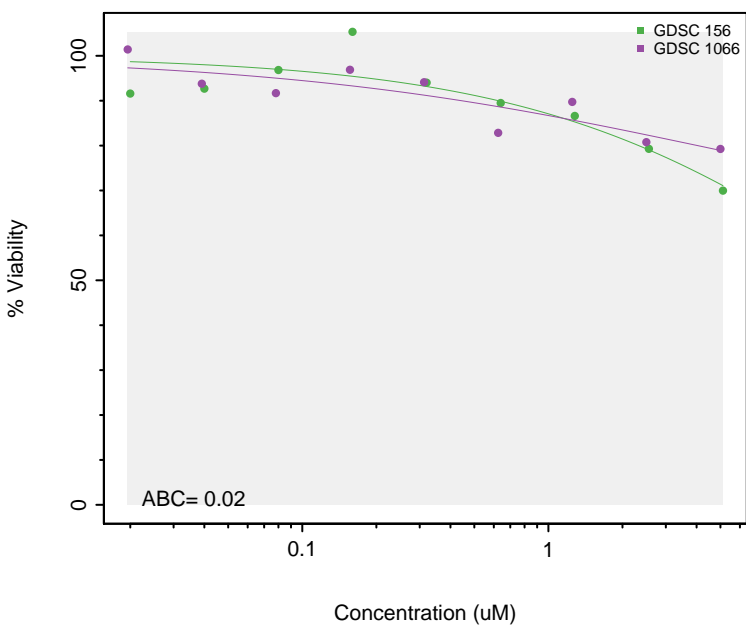

AZD6482:MKN45

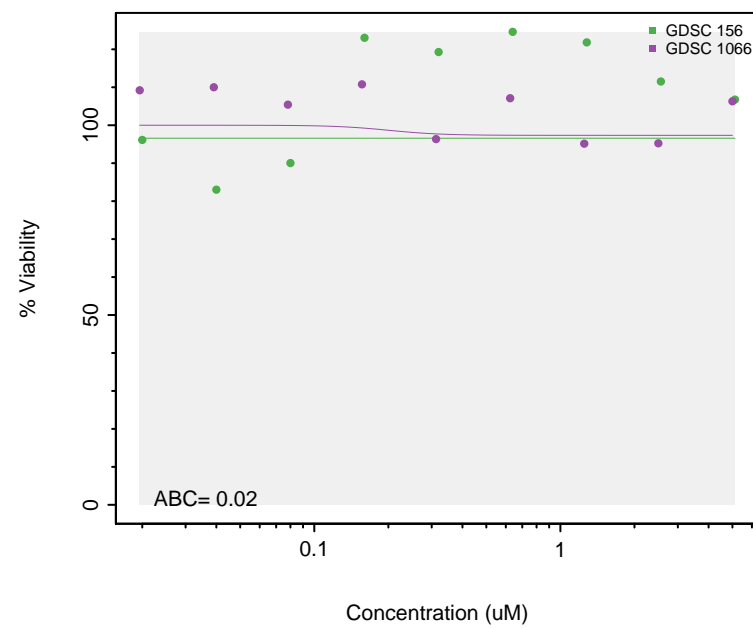

AZD6482:SK-N-FI

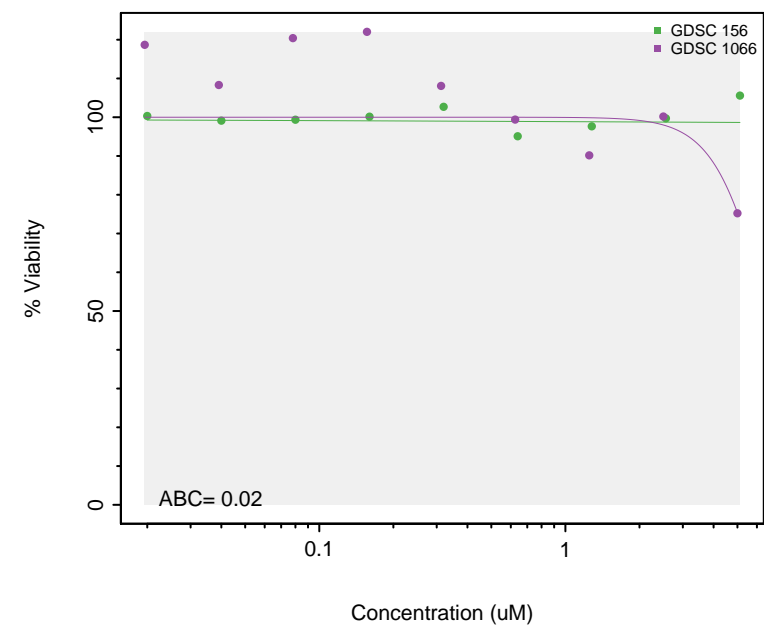

AZD6482:8505C

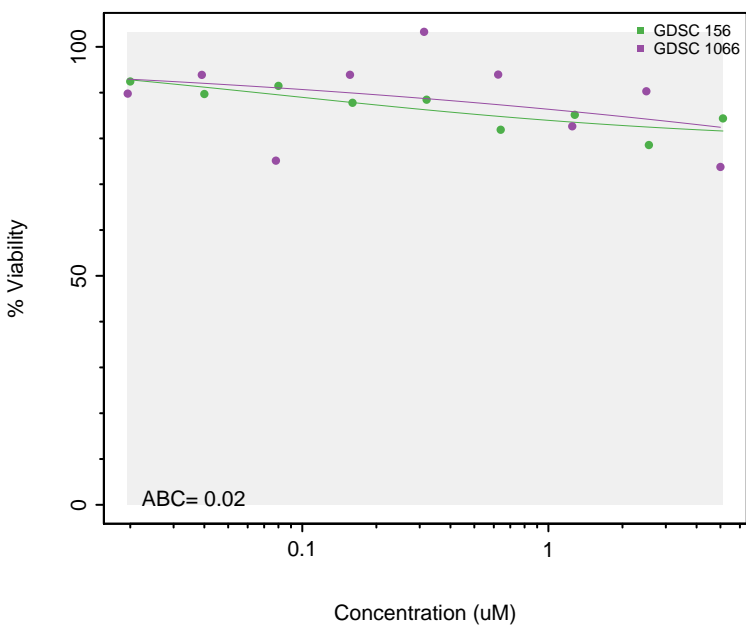

AZD6482:LN-405

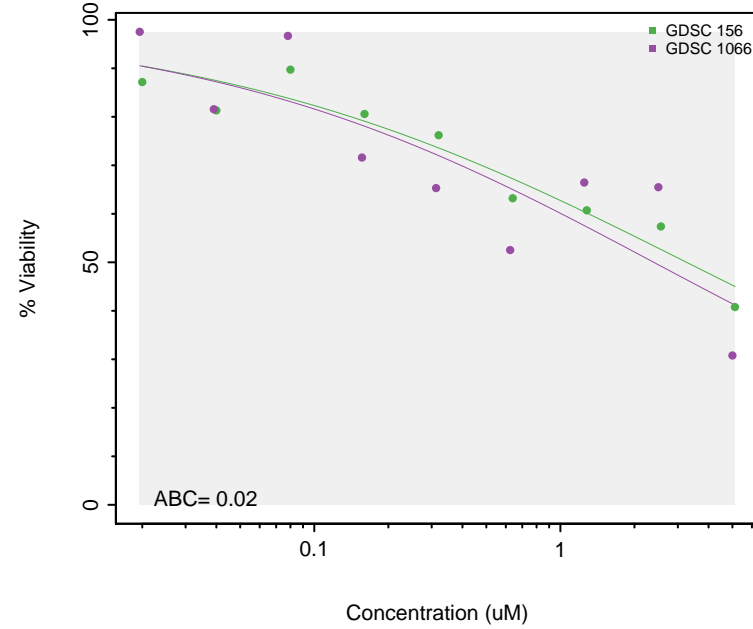

AZD6482:NCI-H187

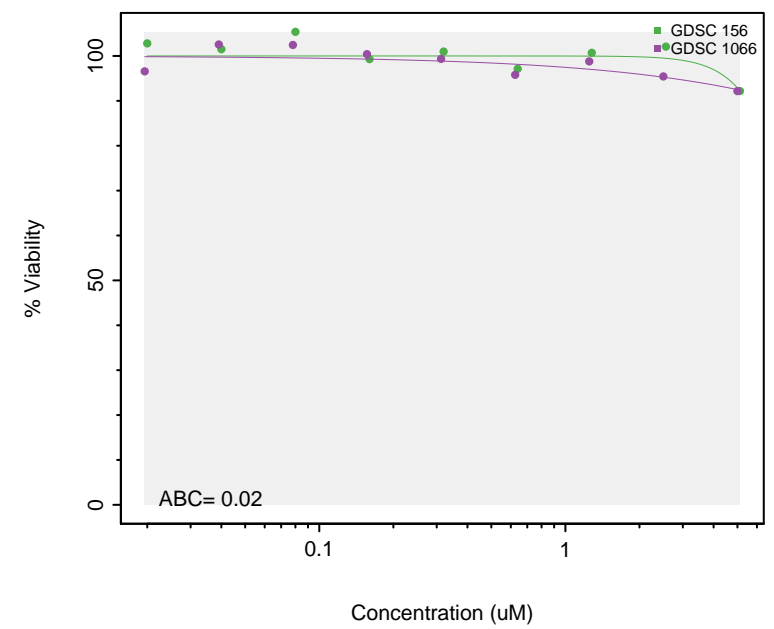

AZD6482:BPH-1

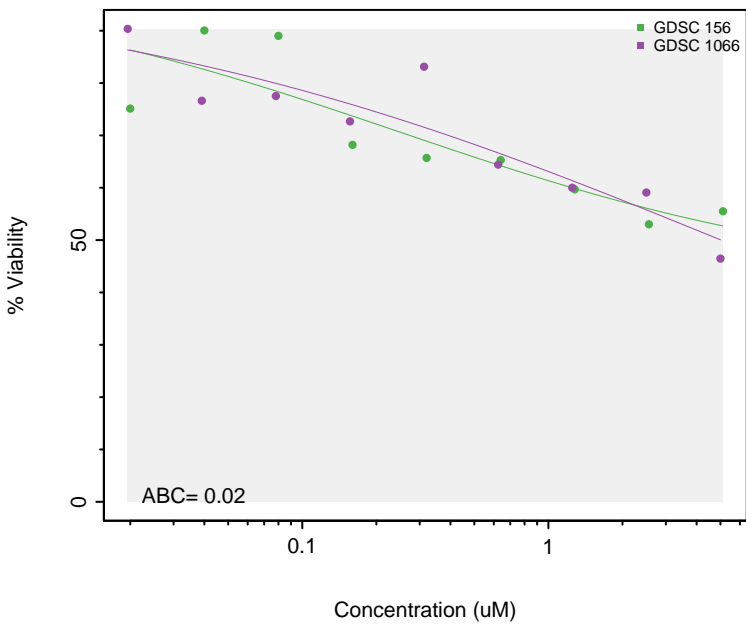

AZD6482:AGS

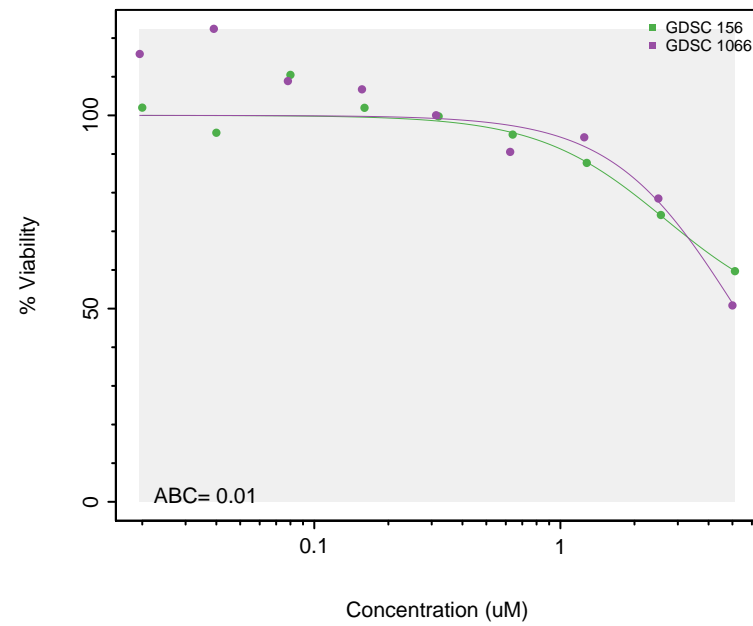

AZD6482:NCI-H1573

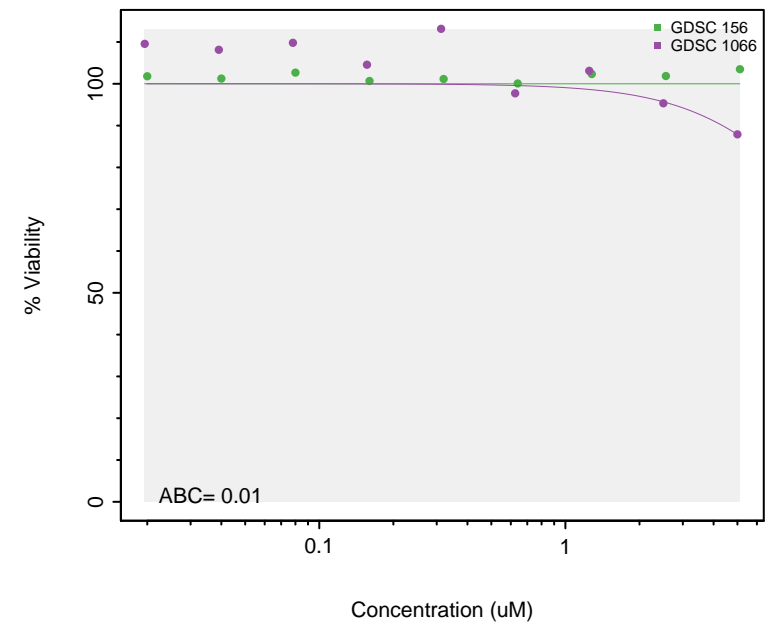

AZD6482:COLO-800

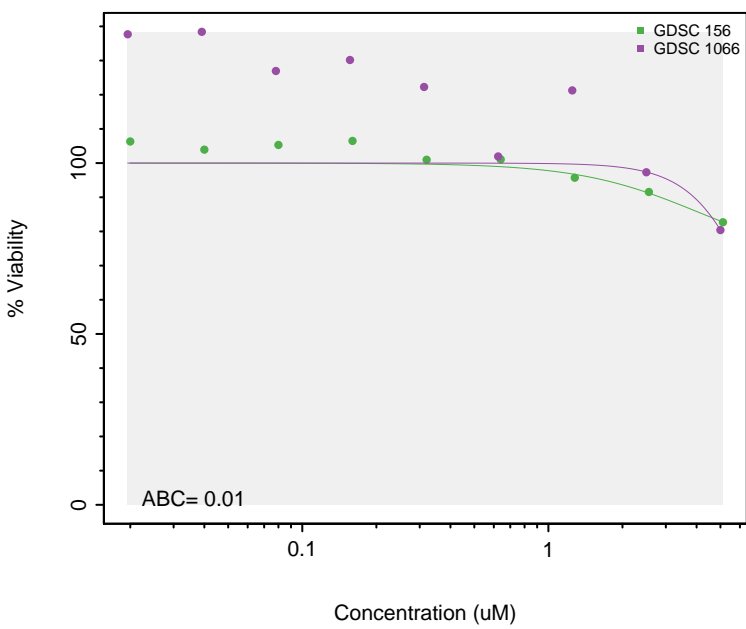

AZD6482:MDA-MB-231

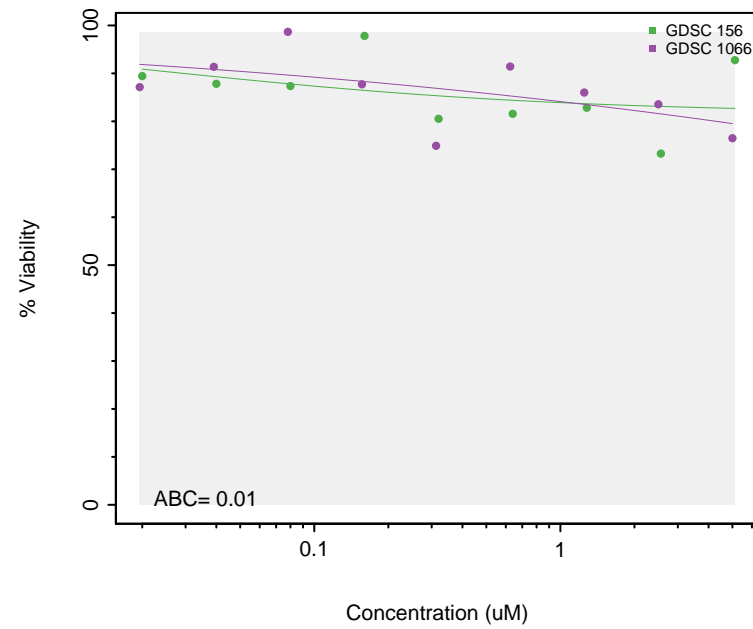

AZD6482:NCI-H1304

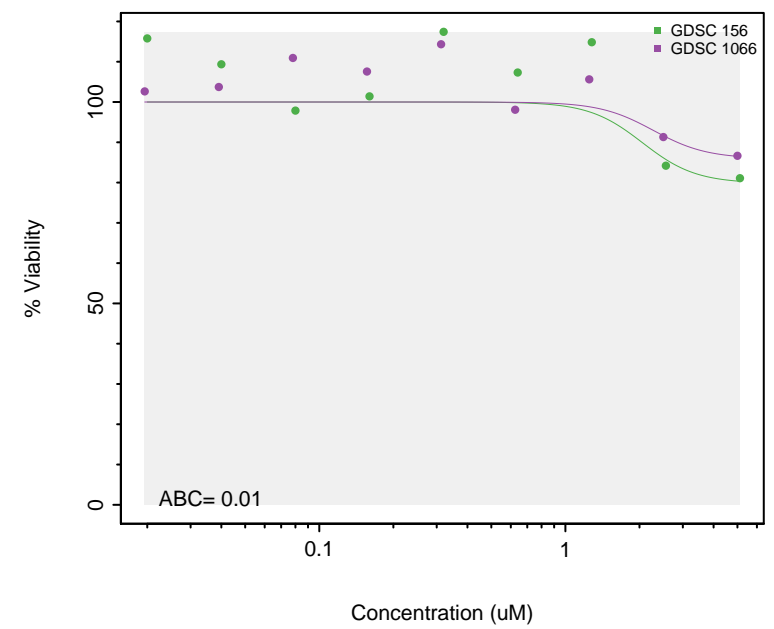

AZD6482:LU-134-A

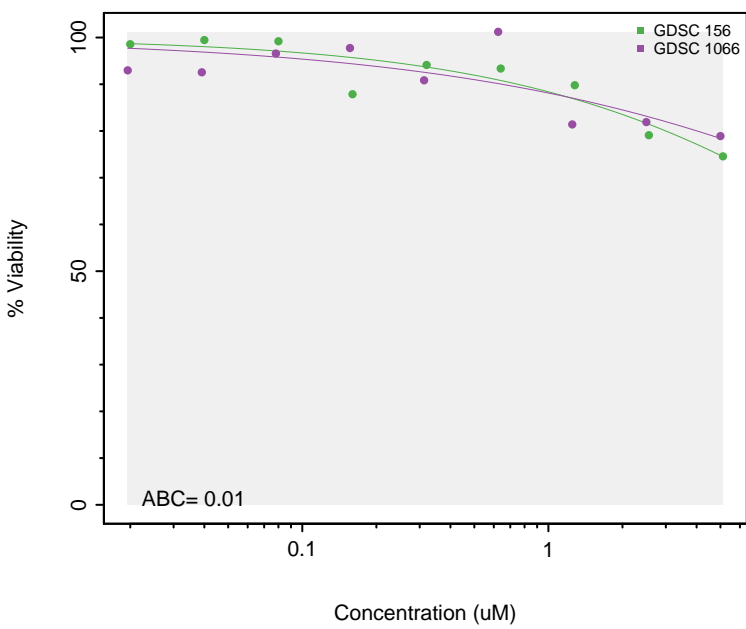

AZD6482:SW1990

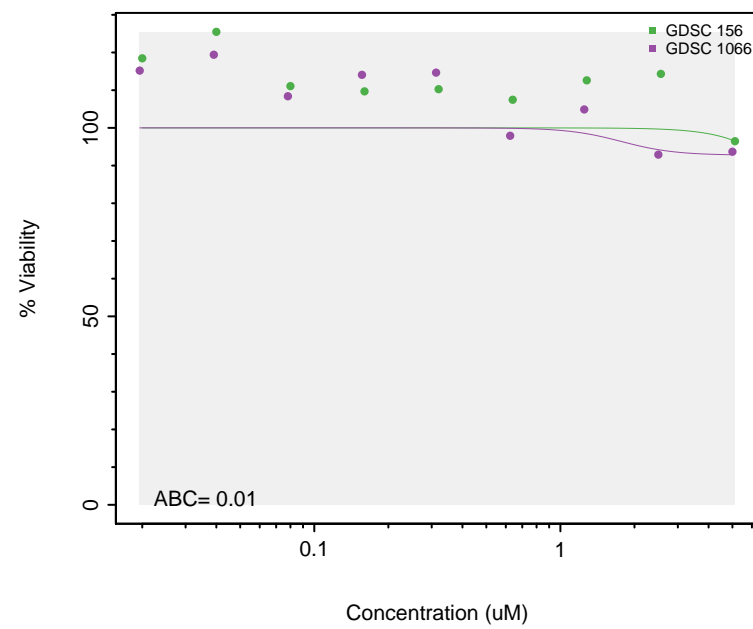

AZD6482:NCI-H69

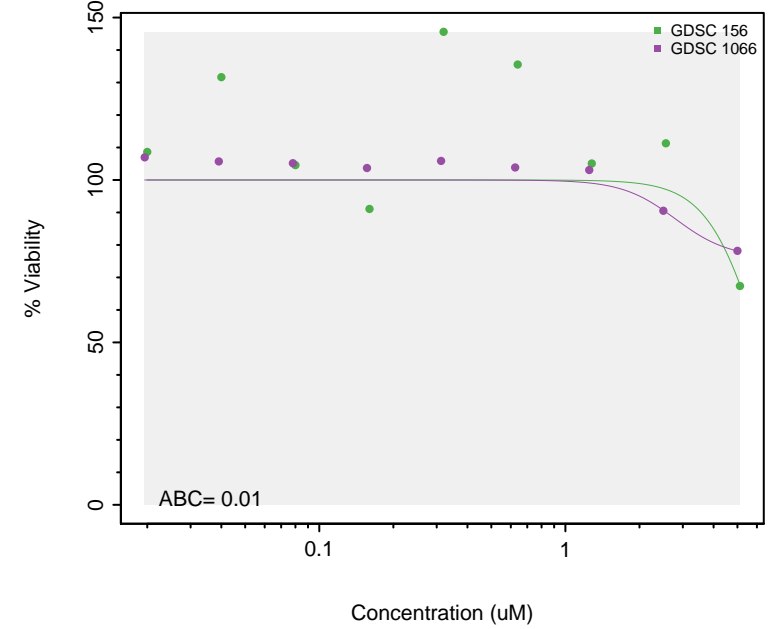

AZD6482:NCI-H1703

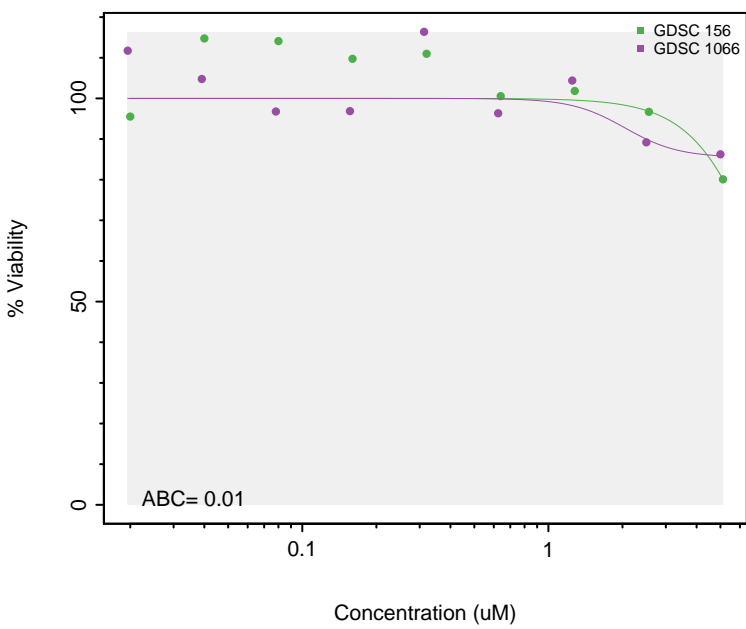

AZD6482:NCI-H1963

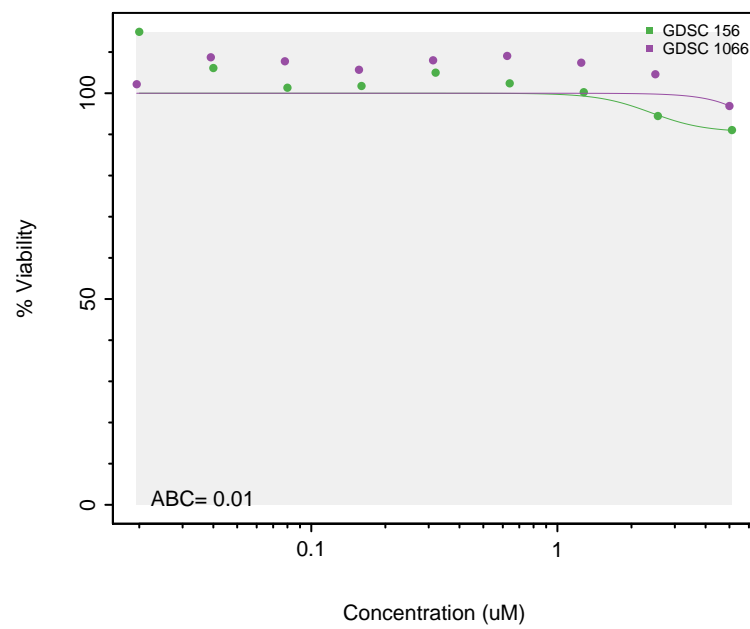

AZD6482:SBC-1

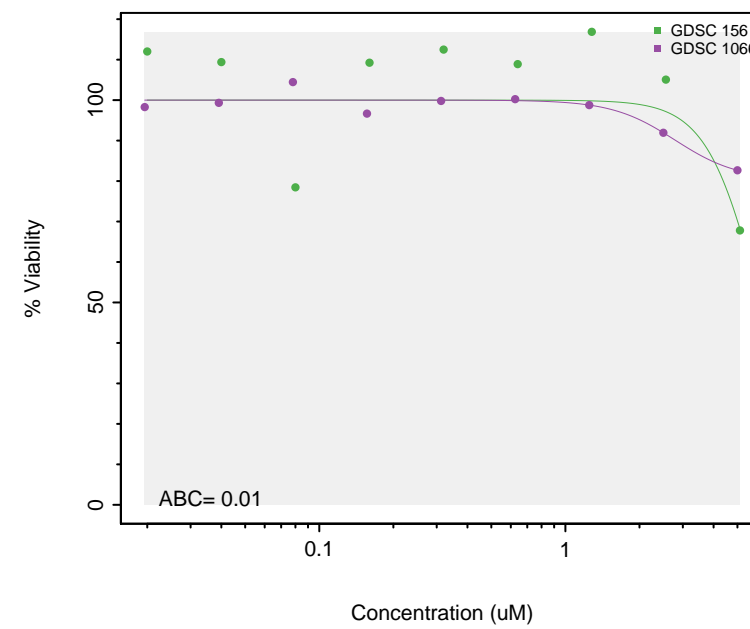

AZD6482:NCI-H2227

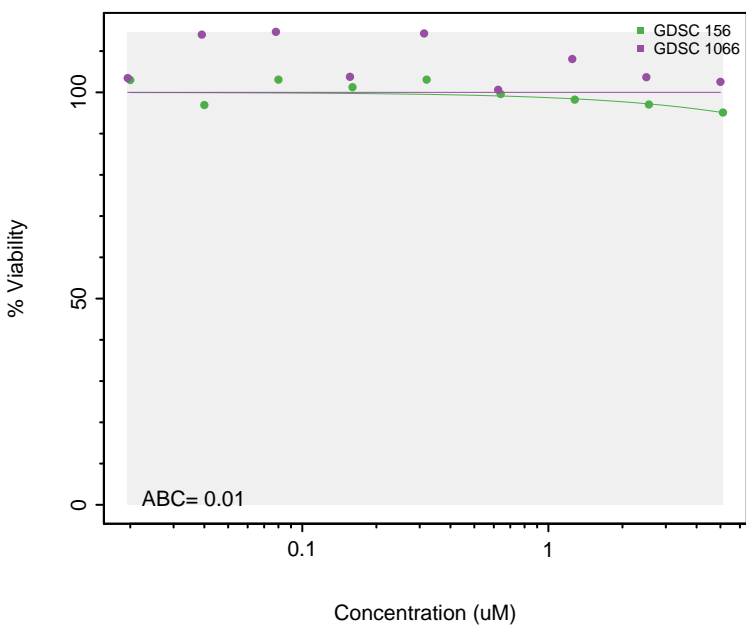

AZD6482:COLO-741

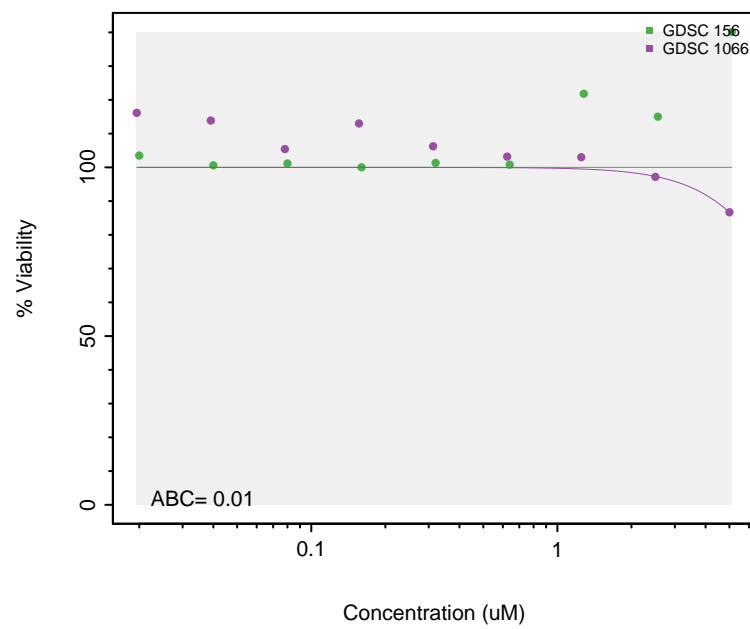

AZD6482:Saos-2

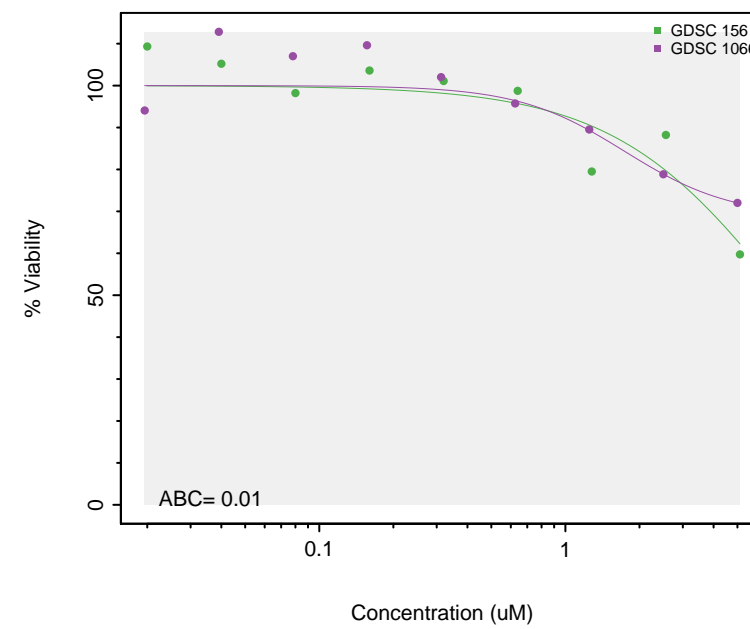

AZD6482:OCI-AML2

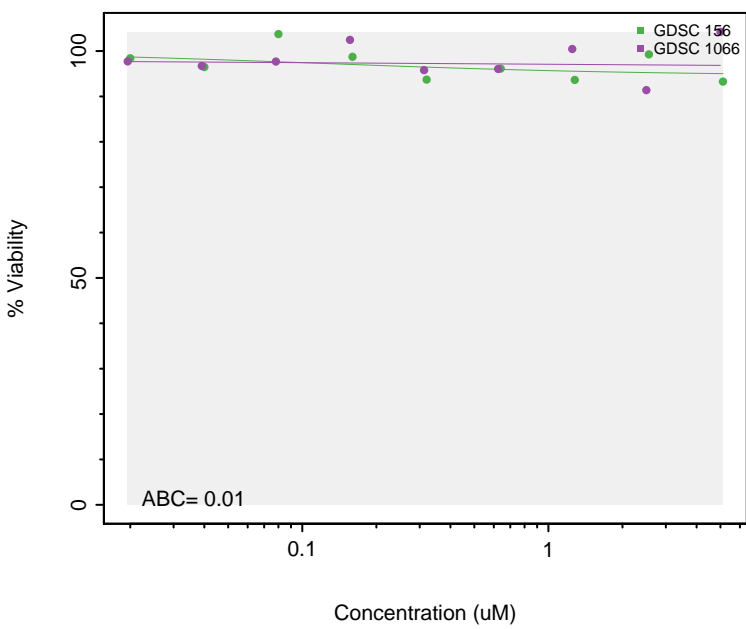

AZD6482:LU-135

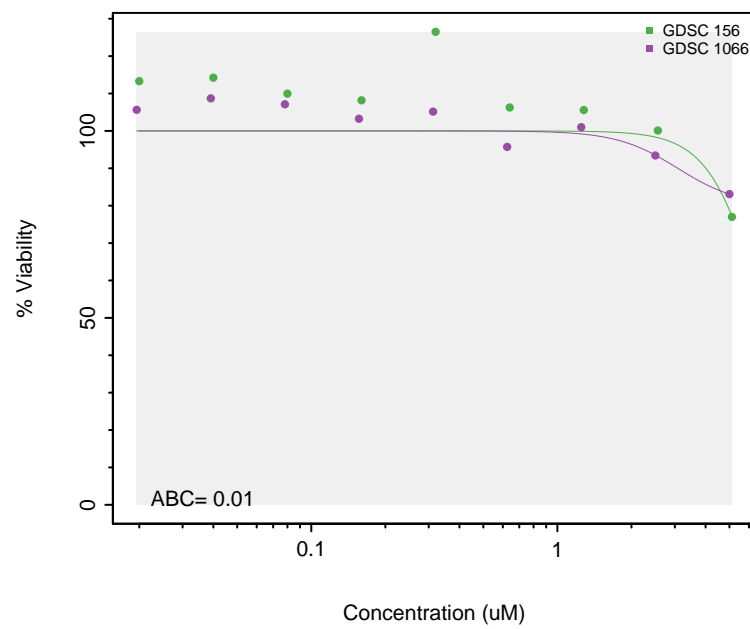

AZD6482:P31-FUJ

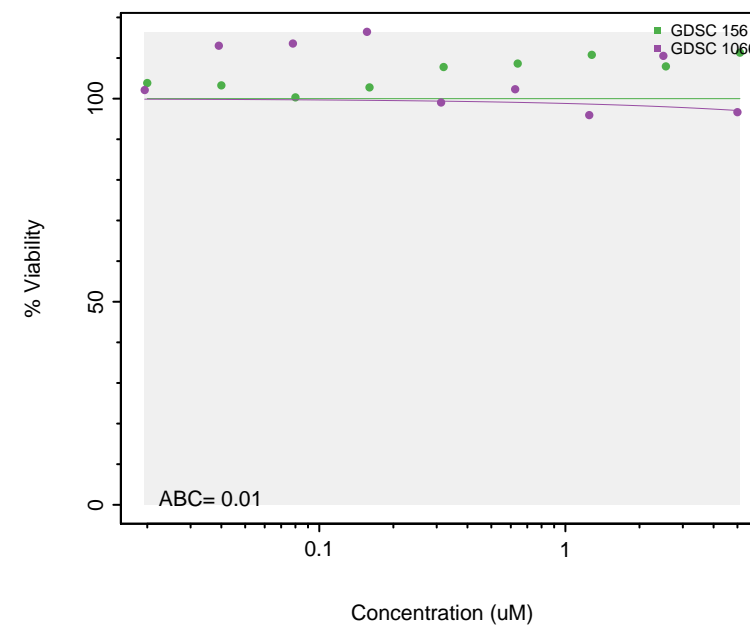

AZD6482:NCI-H720

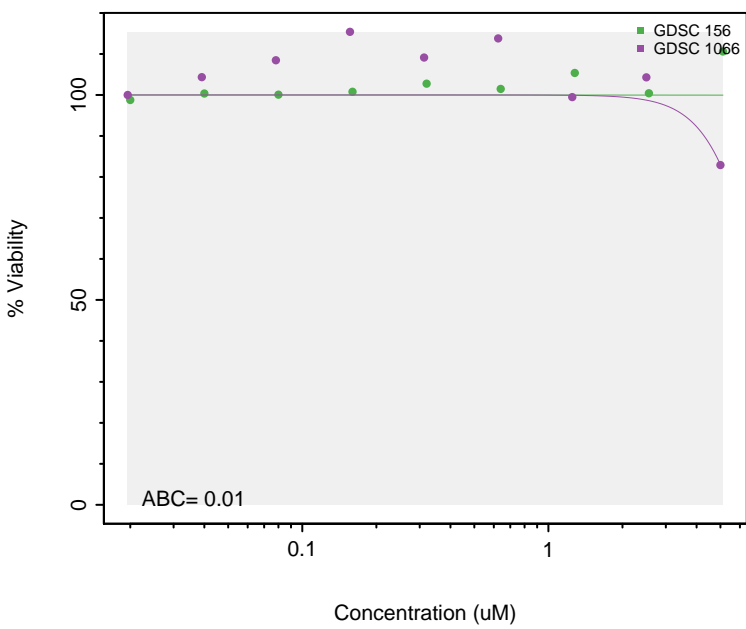

AZD6482:LU-99A

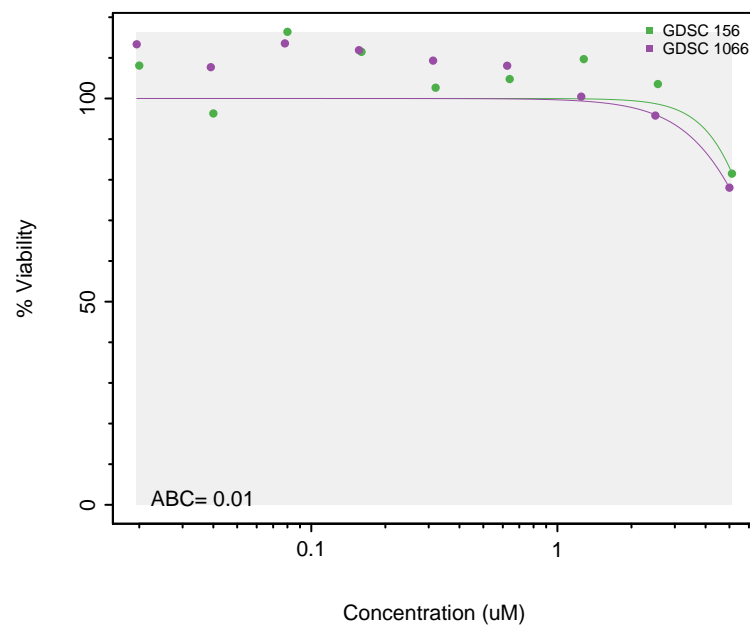

AZD6482:BOKU

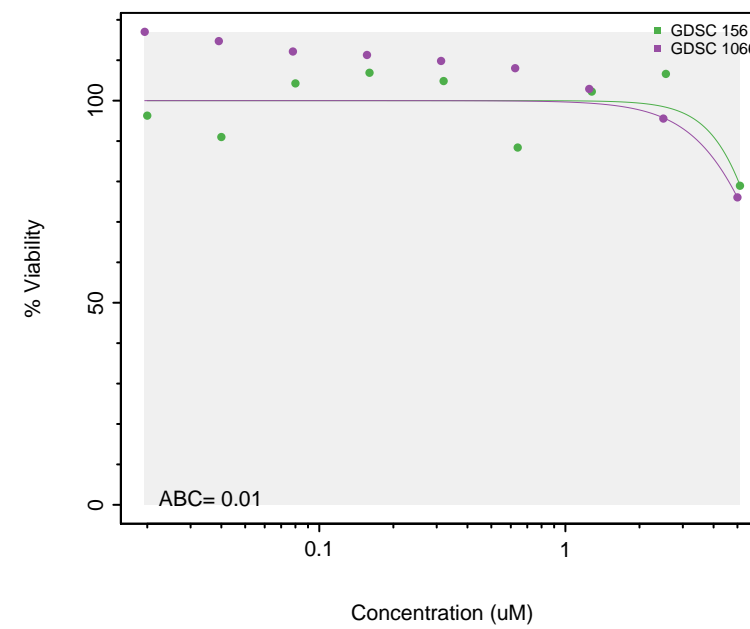

AZD6482:RT4

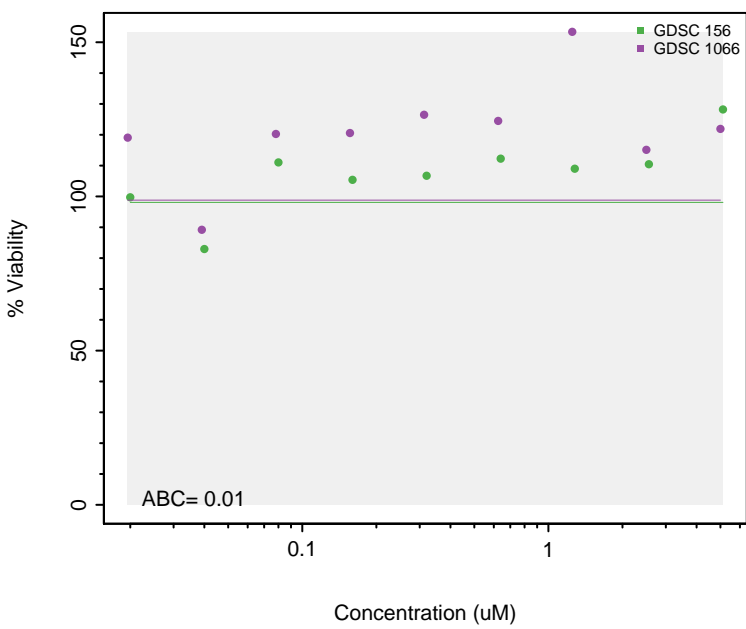

AZD6482:SK-MEL-1

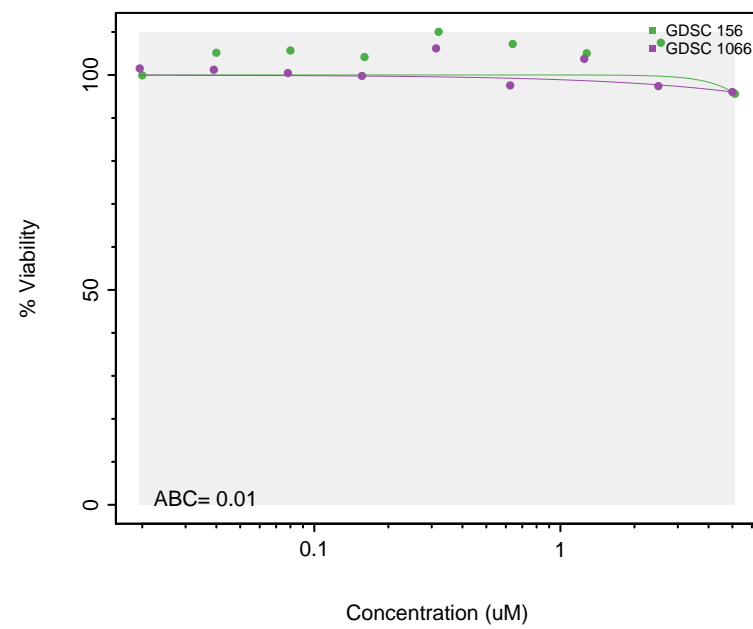

AZD6482:DU-4475

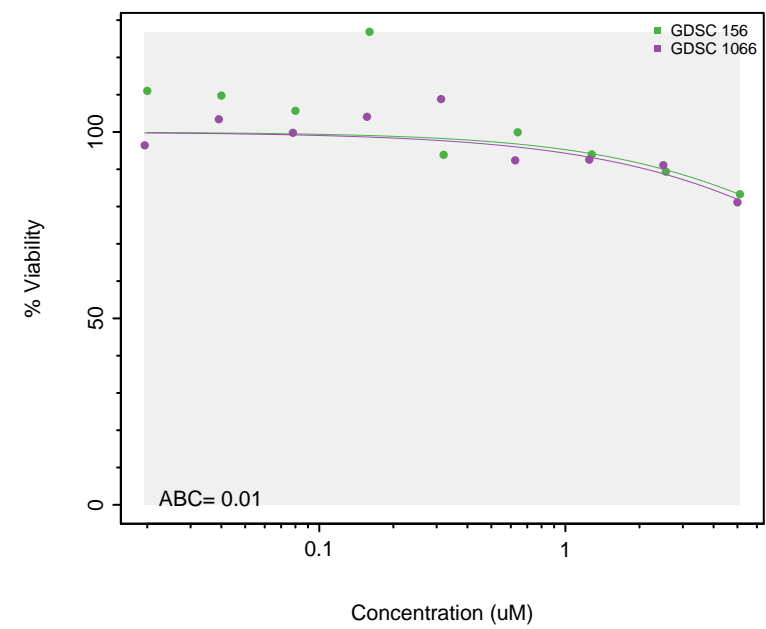

AZD6482:LS-513

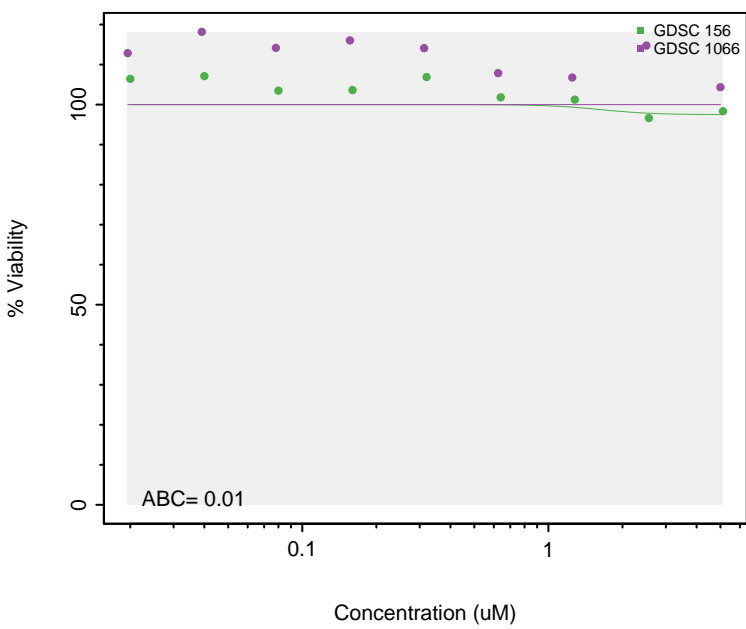

AZD6482:MSTO-211H

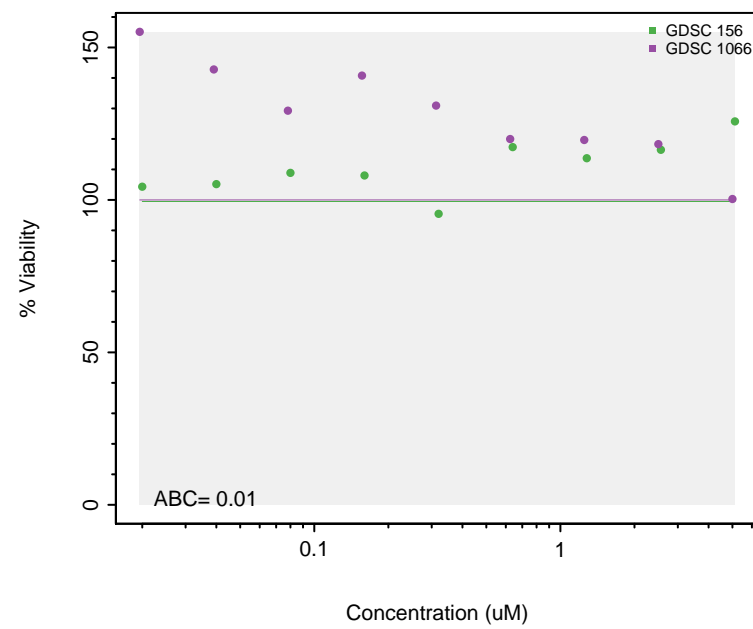

AZD6482:NCI-H510A

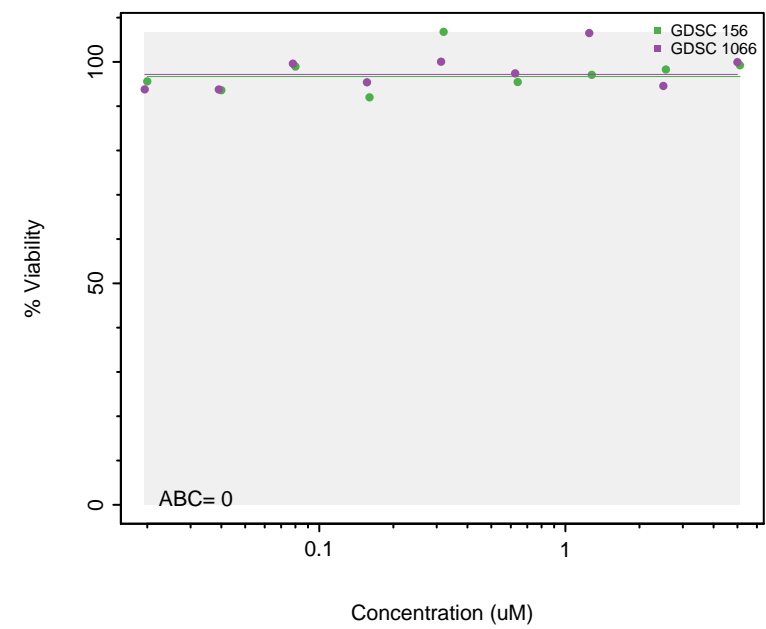

AZD6482:NCI-H1838

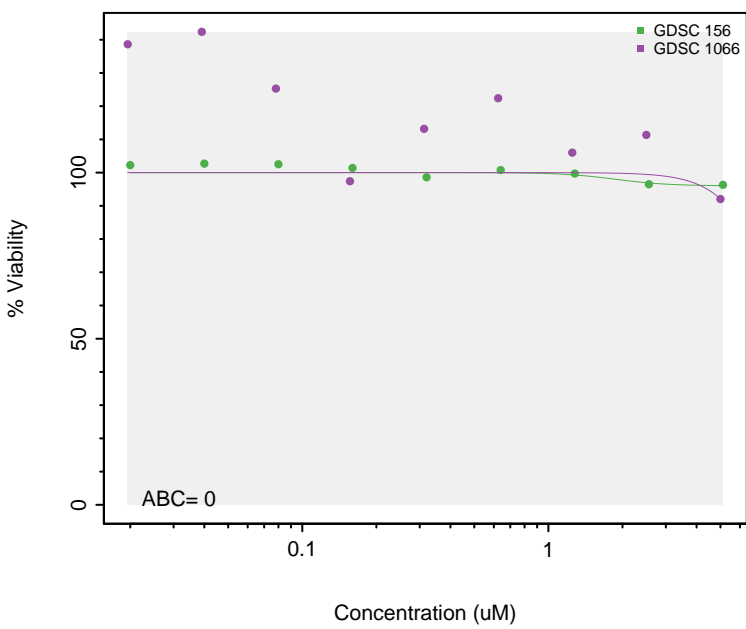

AZD6482:MRK-nu-1

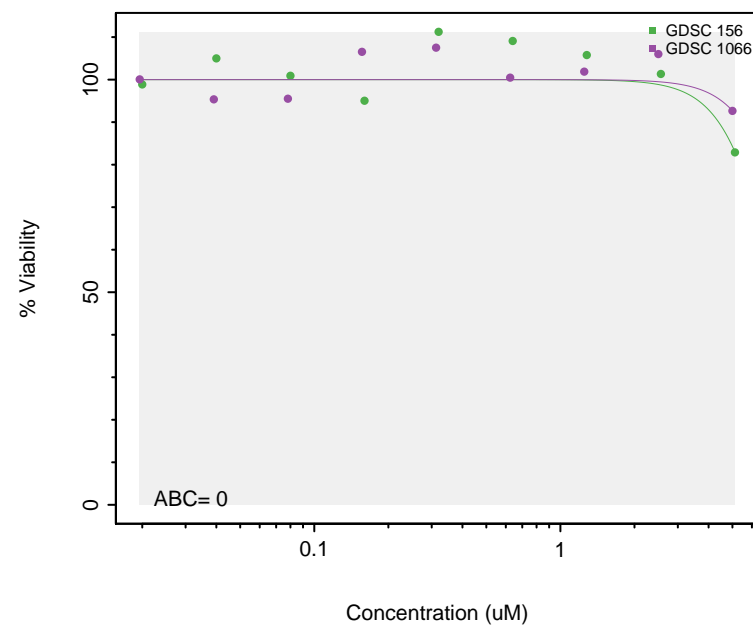

AZD6482:COLO-320-HSR

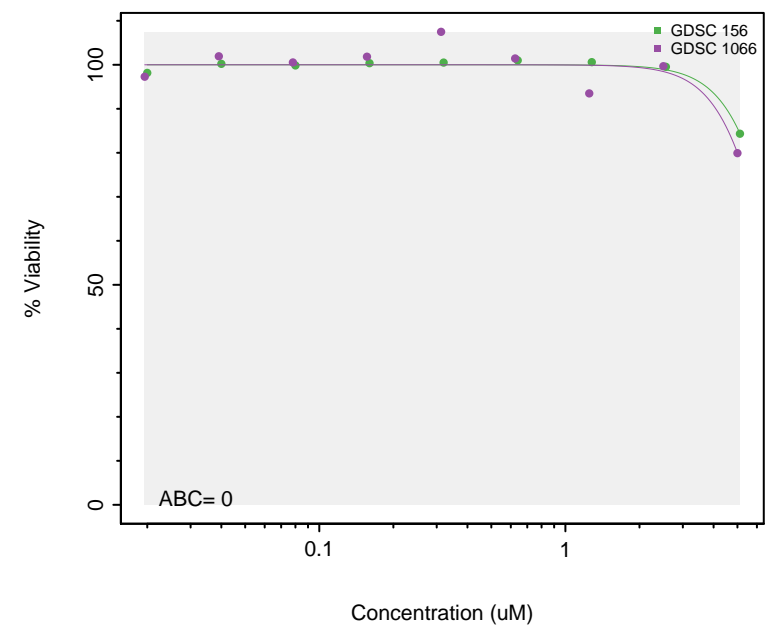

AZD6482:NCI-H345

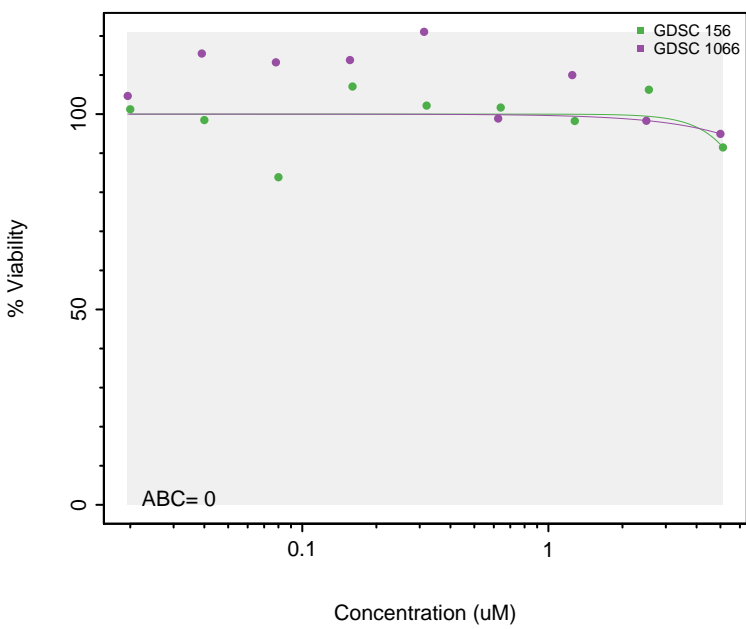

AZD6482:LU-65

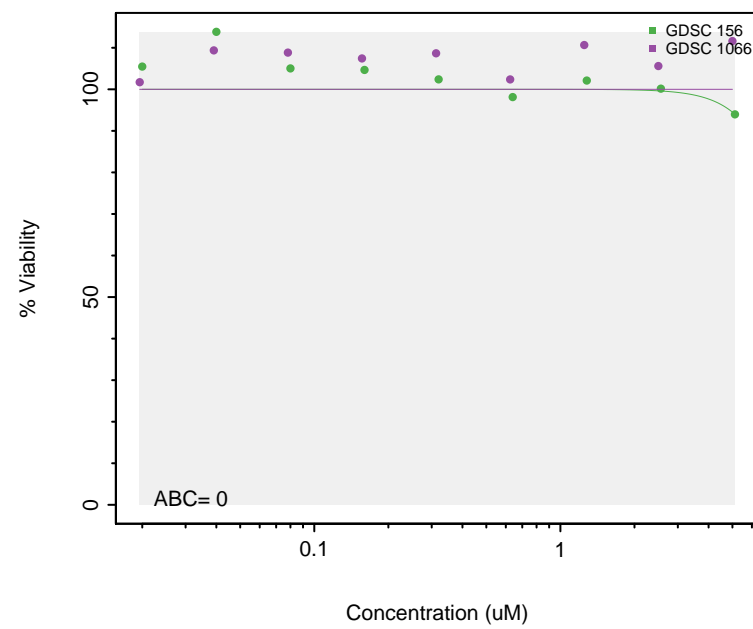

AZD6482:HCC1187

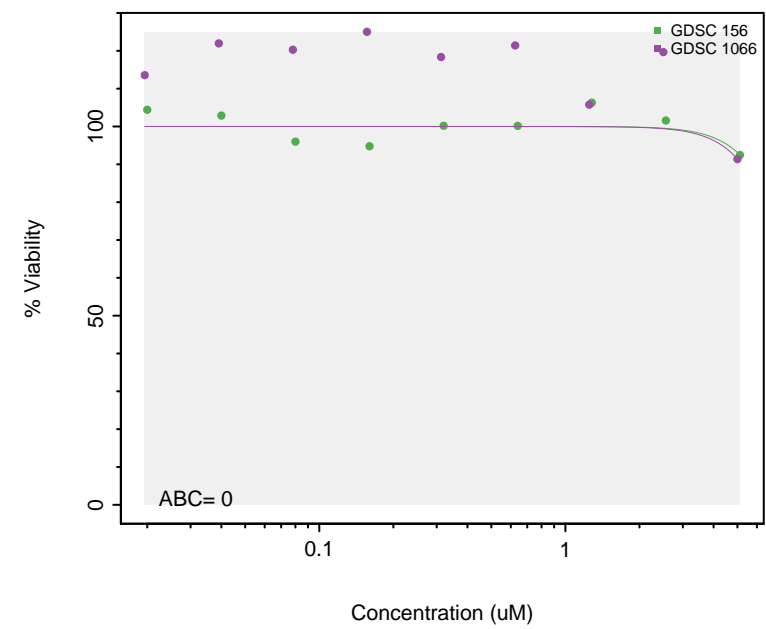



AZD6482:GP5d

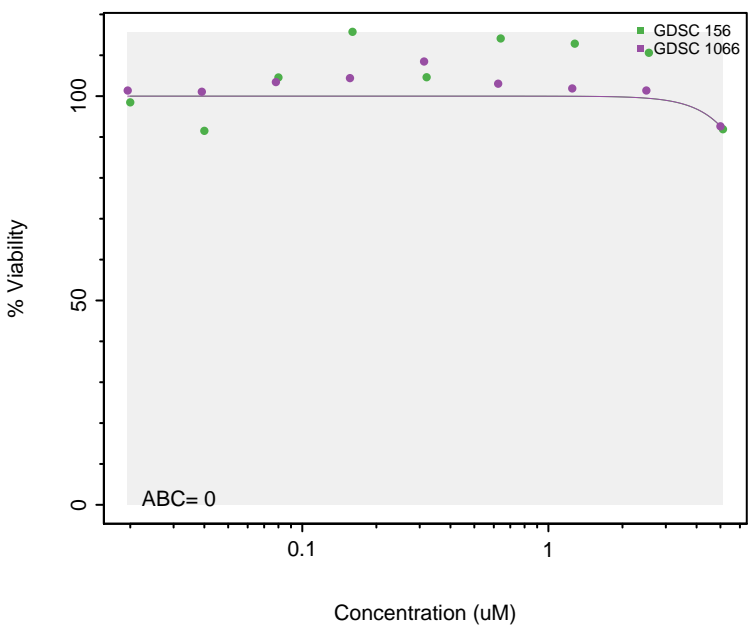

Supplement: Supplementary file [file 026153-4.pdf]
